# Supplementary material
Source: PubMed Central journal article supplement (PMC4526682)
Supplement: NIHMS636735-supplement-1.pdf [file NIHMS636735-supplement-1.pdf]

Table S1. Meta-analysis and per-cohort association results

| Meta-analysis results using a random-effects model |           |                   |                |                                  |                                   |                      | Cohort 1:<br>Illumina<br>317K |         |          |                     |         | Cohort 2:<br>Perlegen<br>400K |          |                     |         | Cohort 3:<br>Illumina<br>550K |          |                     |         | Cohort 4:<br>Illumina<br>GoldenGate |         |                     |         | Cohort 5:<br>Illumina<br>660Quad/<br>1.2M Duo |           |                     |         |  |
|----------------------------------------------------|-----------|-------------------|----------------|----------------------------------|-----------------------------------|----------------------|-------------------------------|---------|----------|---------------------|---------|-------------------------------|----------|---------------------|---------|-------------------------------|----------|---------------------|---------|-------------------------------------|---------|---------------------|---------|-----------------------------------------------|-----------|---------------------|---------|--|
| CHR                                                | (b37)     | SNP               | N <sup>1</sup> | P <sub>random</sub> <sup>2</sup> | OR <sub>random</sub> <sup>3</sup> | p-value <sup>4</sup> | OR_1                          | SE_1    | P_1      | info_1 <sup>5</sup> | OR_2    | SE_2                          | P_2      | info_2 <sup>6</sup> | OR_3    | SE_3                          | P_3      | info_3 <sup>7</sup> | OR_4    | SE_4                                | P_4     | info_4 <sup>8</sup> | OR_5    | SE_5                                          | P_5       | info_5 <sup>9</sup> |         |  |
| 6                                                  | 137900027 | rs79689527        | 5              | 0.2303                           | 0.8908                            | 0.7186               | 0.94476                       | 0.48981 | 0.99334  | 0.67056             | 0.69491 | 0.22251                       | 0.012651 | 0.63712             | 1.0672  | 0.25244                       | 0.72623  | 0.80942             | 1.1736  | 0.49459                             | 0.52424 | 0.52559             | 0.90222 | 0.12552                                       | 0.16735   | 0.74673             |         |  |
| 6                                                  | 137900288 | rs78874416        | 3              | 0.3183                           | 2.2897                            | 0.2151               | --                            | --      | --       | --                  | 1.4212  | 1.1382                        | 0.53082  | 0.44852             | 17.783  | 1.4082                        | 0.23294  | 0.72484             | --      | --                                  | --      | --                  | 0.94476 | 0.98664                                       | 0.94161   | 0.40121             |         |  |
| 6                                                  | 137900426 | rs6940377         | 5              | 0.6044                           | 0.9812                            | 0.5996               | 0.76654                       | 0.15845 | 0.12845  | 0.98436             | 0.98473 | 0.075479                      | 0.86577  | 0.85444             | 0.98083 | 0.11049                       | 0.79944  | 0.98319             | 1.0821  | 0.21568                             | 0.4512  | 0.44744             | 0.99777 | 0.048519                                      | 0.59036   | 0.97887             |         |  |
| 6                                                  | 137900507 | rs592179          | 5              | 0.3051                           | 0.9686                            | 0.7439               | 0.98552                       | 0.12963 | 0.74556  | 1                   | 0.98467 | 0.065149                      | 0.74373  | 0.88717             | 0.85779 | 0.099233                      | 0.07654  | 1                   | 0.88621 | 0.19131                             | 0.12192 | 0.40935             | 0.98439 | 0.041545                                      | 0.75566   | 1                   |         |  |
| 6                                                  | 137900707 | rs591796          | 5              | 0.1433                           | 0.9592                            | 0.7688               | 0.86734                       | 0.11968 | 0.30009  | 1                   | 0.93754 | 0.055728                      | 0.23688  | 0.95849             | 0.91207 | 0.087732                      | 0.24492  | 1                   | 0.99026 | 0.16723                             | 0.8489  | 0.45061             | 0.98765 | 0.038426                                      | 0.53234   | 1                   |         |  |
| 6                                                  | 137900749 | rs7758499         | 5              | 0.01303                          | 0.9152                            | 0.6209               | 0.79561                       | 0.15827 | 0.21333  | 0.90552             | 0.96679 | 0.071511                      | 0.61897  | 0.96606             | 0.91845 | 0.10476                       | 0.40466  | 0.98212             | 1.1236  | 0.20407                             | 0.18296 | 0.44374             | 0.89346 | 0.048021                                      | 0.055409  | 0.97834             |         |  |
| 6                                                  | 137900781 | rs187994982       | 4              | 0.4786                           | 0.7424                            | 0.2931               | --                            | --      | --       | --                  | 1.918   | 0.66113                       | 0.28573  | 0.8847              | 0.91038 | 0.93568                       | 0.85609  | 0.99091             | 0.28956 | 1.2199                              | 0.32466 | 0.70254             | 0.43281 | 0.53436                                       | 0.29493   | 0.94723             |         |  |
| 6                                                  | 137900923 | rs6570176         | 5              | 0.535                            | 0.9553                            | 0.4638               | 0.88922                       | 0.29996 | 0.38629  | 0.97302             | 1.1832  | 0.14915                       | 0.15532  | 0.77857             | 0.7209  | 0.24495                       | 0.083099 | 0.9676              | 0.94413 | 0.38038                             | 0.74697 | 0.48331             | 0.91899 | 0.097848                                      | 0.26062   | 0.95192             |         |  |
| 6                                                  | 137900971 | rs72975338        | 4              | 0.4573                           | 0.9011                            | 0.3669               | 0.95375                       | 0.67475 | 0.96211  | 0.50973             | 0.80034 | 0.28395                       | 0.11989  | 0.50967             | 1.6372  | 0.36791                       | 0.08415  | 0.68937             | --      | --                                  | --      | --                  | 0.81556 | 0.16782                                       | 0.064702  | 0.59179             |         |  |
| 6                                                  | 137901004 | rs76508093        | 5              | 0.8984                           | 1.0478                            | 0.9775               | 0.5494                        | 1.4138  | 0.54656  | 0.49246             | 1.2371  | 0.63285                       | 0.44941  | 0.42527             | 1.1446  | 1.0295                        | 0.93361  | 0.54048             | 1.3729  | 0.95108                             | 0.33547 | 0.35627             | 0.86315 | 0.63942                                       | 0.82481   | 0.38658             |         |  |
| 6                                                  | 137901158 | rs138824233       | 5              | 0.634                            | 1.0521                            | 0.7751               | 0.82292                       | 0.51952 | 0.69265  | 0.71691             | 1.0451  | 0.20057                       | 0.80326  | 0.82282             | 0.89764 | 0.332                         | 0.65673  | 0.78819             | 6.60057 | 0.57402                             | 0.07143 | 0.48691             | 1.1507  | 0.14569                                       | 0.53478   | 0.78496             |         |  |
| 6                                                  | 137901239 | rs117845581       | 5              | 0.2761                           | 1.1233                            | 0.7414               | 1.1892                        | 0.49083 | 0.40704  | 0.62808             | 0.94194 | 0.20864                       | 0.63695  | 0.65636             | 1.0389  | 0.6605                        | 0.89157  | 0.45909             | 1.9438  | 0.50778                             | 0.00589 | 0.51085             | 1.1623  | 0.13549                                       | 0.88158   | 0.72119             |         |  |
| 6                                                  | 137901254 | rs150905828       | 2              | 0.4185                           | 3.7462                            | 0.5162               | 0.7272                        | 1.9259  | 0.3342   | 0.70831             | --      | --                            | --       | --                  | --      | --                            | --       | --                  | --      | --                                  | --      | --                  | 0.68871 | 3.0774                                        | 0.68382   | 0.31073             |         |  |
| 6                                                  | 137901303 | rs13205789        | 5              | 0.004119                         | 1.1232                            | 0.7482               | 1.3181                        | 0.17791 | 0.096486 | 0.88999             | 1.1126  | 0.081829                      | 0.15494  | 0.92669             | 1.0711  | 0.11508                       | 0.54704  | 0.98379             | 0.86805 | 0.2709                              | 0.20071 | 0.396               | 1.1346  | 0.054225                                      | 0.0065888 | 0.97838             |         |  |
| 6                                                  | 137901438 | rs111417843       | 3              | 0.3259                           | 2.3486                            | 0.2154               | --                            | --      | --       | --                  | 1.4606  | 1.0111                        | 0.58877  | 0.61443             | 23.961  | 1.571                         | 0.31152  | 0.81408             | --      | --                                  | --      | --                  | 0.89729 | 1.1574                                        | 0.99734   | 0.59696             |         |  |
| 6                                                  | 137901443 | rs6570177         | 5              | 0.5226                           | 0.9536                            | 0.4032               | 0.91321                       | 0.31674 | 0.54055  | 1                   | 1.1973  | 0.1519                        | 0.14791  | 0.80282             | 0.70019 | 0.24459                       | 0.07222  | 1                   | 0.90054 | 0.40578                             | 0.57764 | 0.47482             | 0.91952 | 0.096241                                      | 0.25982   | 1                   |         |  |
| 6                                                  | 137901555 | chr6:137901555D:5 | 5              | 0.5002                           | 1.0825                            | 0.5599               | 2.2033                        | 0.52695 | 0.009798 | 0.65937             | 1.2223  | 0.23542                       | 0.21784  | 0.66946             | 0.81361 | 0.3303                        | 0.37423  | 0.85118             | 1.1805  | 0.66615                             | 0.51809 | 0.38247             | 1.0202  | 0.15943                                       | 0.87399   | 0.73222             |         |  |
| 6                                                  | 137901588 | rs78726182        | 3              | 0.3237                           | 2.3858                            | 0.2069               | --                            | --      | --       | --                  | 1.4606  | 1.0111                        | 0.58877  | 0.61443             | 24.939  | 1.5704                        | 0.31076  | 0.81484             | --      | --                                  | --      | --                  | 0.89743 | 1.1572                                        | 0.99751   | 0.59804             |         |  |
| 6                                                  | 137901724 | rs115126934       | 3              | 0.1371                           | 0.2206                            | 0.4139               | 0.0389                        | 1.9276  | 0.44117  | 0.71296             | --      | --                            | --       | --                  | 0.11242 | 0.2059                        | 0.21482  | 0.83324             | --      | --                                  | --      | --                  | 0.85352 | 1.4704                                        | 0.94854   | 0.47422             |         |  |
| 6                                                  | 137902222 | rs11966432        | 5              | 0.9865                           | 0.9993                            | 0.5602               | 0.76677                       | 0.17326 | 0.28939  | 0.9897              | 0.96673 | 0.087439                      | 0.68572  | 0.86554             | 1.0575  | 0.11922                       | 0.60728  | 0.98563             | 1.0817  | 0.247                               | 0.50412 | 0.45675             | 1.022   | 0.053379                                      | 0.99402   | 0.98397             |         |  |
| 6                                                  | 137902247 | rs117079395       | 5              | 0.3079                           | 0.6945                            | 0.8858               | 0.19359                       | 1.4564  | 0.26098  | 0.58047             | 0.78055 | 0.772                         | 0.51904  | 0.5013              | 1.3592  | 1.1688                        | 0.62965  | 0.52447             | 0.95087 | 1.9847                              | 0.95671 | 0.57557             | 0.76056 | 0.46175                                       | 0.17863   | 0.58756             |         |  |
| 6                                                  | 137902440 | rs491335          | 5              | 0.2138                           | 0.9647                            | 0.6674               | 0.89578                       | 0.12256 | 0.52191  | 0.9954              | 0.9112  | 0.056083                      | 0.096766 | 1                   | 0.9476  | 0.0895                        | 0.52818  | 0.99654             | 0.99552 | 0.16518                             | 0.91157 | 0.47075             | 1.0011  | 0.03911                                       | 0.85104   | 0.99431             |         |  |
| 6                                                  | 137902673 | rs670295          | 5              | 0.3382                           | 1.028                             | 0.6278               | 1.0148                        | 0.12473 | 0.95352  | 0.93848             | 1.0045  | 0.056496                      | 0.92066  | 0.98876             | 0.94366 | 0.085962                      | 0.44493  | 0.99117             | 0.90979 | 0.16703                             | 0.22427 | 0.4579              | 1.0667  | 0.039179                                      | 0.099824  | 0.99049             |         |  |
| 6                                                  | 137902750 | rs60638137        | 5              | 0.7819                           | 0.9889                            | 0.451                | 0.76591                       | 0.17386 | 0.2869   | 0.98589             | 0.92657 | 0.08395                       | 0.3322   | 0.88446             | 1.0496  | 0.11915                       | 0.65021  | 0.98336             | 1.1308  | 0.23784                             | 0.28857 | 0.47148             | 1.0206  | 0.053252                                      | 0.97964   | 0.98499             |         |  |
| 6                                                  | 137902944 | rs59020051        | 5              | 0.7873                           | 0.9892                            | 0.4495               | 0.76617                       | 0.17372 | 0.28918  | 0.98647             | 0.92666 | 0.08396                       | 0.33273  | 0.8842              | 1.0525  | 0.11895                       | 0.63458  | 0.98613             | 1.1285  | 0.23787                             | 0.29717 | 0.47183             | 1.0206  | 0.053278                                      | 0.9834    | 0.98422             |         |  |
| 6                                                  | 137903040 | rs72975343        | 5              | 0.004157                         | 1.123                             | 0.7472               | 1.3179                        | 0.17791 | 0.096699 | 0.89                | 1.1126  | 0.081832                      | 0.15498  | 0.92657             | 1.0709  | 0.1151                        | 0.54807  | 0.98369             | 0.86731 | 0.27085                             | 0.19809 | 0.39619             | 1.1345  | 0.054236                                      | 0.0066141 | 0.97849             |         |  |
| 6                                                  | 137903489 | rs149741282       | 5              | 0.9063                           | 0.9637                            | 0.1793               | 1.3096                        | 0.88689 | 0.94641  | 0.75954             | 1.22    | 0.34515                       | 0.48434  | 0.84348             | 1.8375  | 0.49752                       | 0.17223  | 0.78657             | 0.15227 | 1.8508                              | 0.1893  | 0.51568             | 0.64269 | 0.21558                                       | 0.058905  | 0.9185              |         |  |
| 6                                                  | 137903572 | chr6:137903572D:5 | 5              | 0.2033                           | 0.9584                            | 0.7228               | 1.0276                        | 0.14332 | 0.82758  | 0.96483             | 0.9163  | 0.064711                      | 0.13466  | 0.90782             | 0.89424 | 0.10721                       | 0.23378  | 0.98625             | 0.88463 | 0.19185                             | 0.16565 | 0.44889             | 0.98898 | 0.044969                                      | 0.82742   | 0.96444             |         |  |
| 6                                                  | 137903756 | rs11970302        | 5              | 0.7905                           | 0.9893                            | 0.4521               | 0.76706                       | 0.17375 | 0.29144  | 0.98633             | 0.92689 | 0.083948                      | 0.33459  | 0.88466             | 1.0506  | 0.11906                       | 0.64494  | 0.98437             | 1.1324  | 0.23786                             | 0.28301 | 0.47202             | 1.0209  | 0.05328                                       | 0.98468   | 0.98347             |         |  |
| 6                                                  | 137903807 | rs184625007       | 4              | 0.4735                           | 1.1061                            | 0.9476               | 1.0286                        | 0.75242 | 0.73795  | 0.70316             | 0.96597 | 0.27447                       | 0.88964  | 0.81803             | 1.1388  | 0.35873                       | 0.71623  | 0.83965             | --      | --                                  | --      | --                  | 1.1762  | 0.19003                                       | 0.13263   | 0.83166             |         |  |
| 6                                                  | 137903930 | rs9484067         | 3              | 0.7958                           | 1.1974                            | 0.942                | --                            | --      | --       | --                  | 1.0982  | 1.1464                        | 0.81374  | 0.3279              | --      | --                            | --       | --                  | --      | 1.5857                              | 1.1173  | 0.40765             | 0.47007 | 0.87175                                       | 1.4122    | 0.93926             | 0.32894 |  |
| 6                                                  | 137904174 | rs9484068         | 2              | 0.7724                           | 1.3241                            | 0.5039               | --                            | --      | --       | --                  | 0.77199 | 1.2622                        | 0.58538  | 0.38969             | --      | --                            | --       | --                  | --      | 2.8879                              | 1.5175  | 0.06691             | 0.39918 | --                                            | --        | --                  | --      |  |
| 6                                                  | 137904347 | rs9484069         | 2              | 0.5521                           | 1.231                             | 0.9733               | --                            | --      | --       | --                  | 1.2502  | 0.58022                       | 0.30259  | 0.38216             | --      | --                            | --       | --                  | --      | --                                  | --      | --                  | 1.2202  | 0.43795                                       | 0.073938  | 0.34146             |         |  |
| 6                                                  | 137904350 | rs34755910        | 5              | 0.008872                         | 1.113                             | 0.68                 | 1.3234                        | 0.1825  | 0.088191 | 0.86335             | 1.0811  | 0.084172                      | 0.29793  | 0.90946             | 1.0681  | 0.11513                       | 0.56231  | 0.98379             | 0.82906 | 0.28556                             | 0.09467 | 0.40472             | 1.1316  | 0.054328                                      | 0.0075756 | 0.97795             |         |  |
| 6                                                  | 137904523 | rs143678452       | 4              | 0.04168                          | 1.4772                            | 0.4652               | 0.83882                       | 0.66303 | 0.76819  | 0.96346             | 2.1014  | 0.35996                       | 0.027693 | 0.89186             | 0.7366  | 0.74743                       | 0.6801   | 0.91016             | --      | --                                  | --      | --                  | 1.4594  | 0.25423                                       | 0.041841  | 0.93925             |         |  |
| 6                                                  | 137904559 | rs540158          | 5              | 0.1805                           | 0.9571                            | 0.8075               | 1.0178                        | 0.13924 | 0.92155  | 0.9937              | 0.91676 | 0.063879                      | 0.13364  | 0.91683             | 0.98393 | 0.10507                       | 0.23431  | 0.98867             | 0.90369 | 0.18959                             | 0.25    | 0.45221             | 0.98556 | 0.043983                                      | 0.82745   | 0.98638             |         |  |
| 6                                                  | 137904588 | rs148083515       | 3              | 0.1411                           | 0.2266                            | 0.4149               | 0.03986                       | 1.9164  | 0.43661  | 0.70874             | --      | --                            | --       | --                  | 0.1166  | 2.0621                        | 0.21104  | 0.82243             | --      | --                                  | --      | --                  | 0.85194 | 1.4506                                        | 0.9514    | 0.47602             |         |  |
| 6                                                  | 137904599 | rs71566040        | 5              | 0.3759                           | 0.9345                            | 0.6548               | 0.86191                       | 0.31218 | 0.45995  | 0.93956             | 1.1344  | 0.15968                       | 0.26934  | 0.71711             | 0.74778 | 0.24837                       | 0.12295  | 0.95411             | 0.92546 | 0.40547                             | 0.63387 | 0.42058             | 0.90576 | 0.10042                                       | 0.16838   | 0.92777             |         |  |
| 6                                                  | 137904640 | rs6903439         | 5              | 0.8608                           | 1.0177                            | 0.1768               | 0.80177                       | 0.26825 | 0.23573  | 0.95804             | 1.33    | 0.61397                       | 0.007626 | 0.76498             | 0.87226 | 0.22807                       | 0.15515  | 0.94963             | 1.0211  | 0.36783                             | 0.932   | 0.40906             | 0.98523 | 0.091209                                      | 0.79571   | 0.94186             |         |  |
| 6                                                  | 137904654 | rs34253238        | 5              | 0.01903                          | 1.1005                            | 0.7075               | 1.3002                        | 0.18226 | 0.093678 | 0.81848             | 1.0651  | 0.084419                      | 0.37006  | 0.86023             | 1.0364  | 0.11581                       | 0.73097  | 0.93889             | 0.86994 | 0.27218                             | 0.1878  | 0.4086              | 1.124   | 0.054136                                      | 0.009     |                     |         |  |

|   |           |                  |   |          |        |        |         |         |          |         |          |          |          |         |          |          |          |         |         |         |         |         |         |          |           |         |
|---|-----------|------------------|---|----------|--------|--------|---------|---------|----------|---------|----------|----------|----------|---------|----------|----------|----------|---------|---------|---------|---------|---------|---------|----------|-----------|---------|
| 6 | 137908055 | rs76615452       | 5 | 0.8664   | 1.1207 | 0.901  | 1.5962  | 1.4215  | 0.82985  | 0.80418 | 1.9903   | 1.2433   | 0.1074   | 0.33939 | 0.19383  | 2.0399   | 0.22835  | 0.7114  | 1.1009  | 1.4581  | 0.83447 | 0.35512 | 0.78289 | 1.7554   | 0.84893   | 0.36878 |
| 6 | 137908183 | rs79943828       | 3 | 0.7834   | 1.2102 | 0.9489 | --      | --      | --       | --      | 1.1195   | 1.1455   | 0.76832  | 0.32001 | --       | --       | --       | --      | 1.5737  | 1.1162  | 0.41433 | 0.46894 | 0.8998  | 1.3993   | 0.9026    | 0.33958 |
| 6 | 137908243 | rs190945633      | 5 | 0.6778   | 1.1679 | 0.8784 | 0.38112 | 1.4384  | 0.38711  | 0.45571 | 1.6162   | 0.66216  | 0.17983  | 0.54962 | 0.44588  | 1.7385   | 0.15969  | 0.46751 | 1.6943  | 1.7631  | 0.59134 | 0.62569 | 1.1677  | 0.51663  | 0.39887   | 0.48997 |
| 6 | 137908292 | rs6933988        | 3 | 0.2893   | 3.3099 | 0.079  | --      | --      | --       | --      | 1.4608   | 1.0111   | 0.59081  | 0.61798 | 57.875   | 1.5661   | 0.30255  | 0.83024 | --      | --      | --      | --      | 0.89835 | 1.1676   | 0.99579   | 0.62146 |
| 6 | 137908309 | rs61070362       | 5 | 0.9737   | 1.0014 | 0.5913 | 0.77537 | 0.17513 | 0.31431  | 0.97949 | 0.96623  | 0.088002 | 0.68006  | 0.86027 | 1.0597   | 0.11988  | 0.59359  | 0.97895 | 1.0881  | 0.247   | 0.47278 | 0.45831 | 1.0238  | 0.053842 | 0.97479   | 0.97353 |
| 6 | 137908578 | rs35574429       | 5 | 0.3869   | 0.9035 | 0.612  | 0.83248 | 0.32077 | 0.40272  | 0.95608 | 1.1455   | 0.68002  | 0.28921  | 0.75332 | 0.73029  | 0.24893  | 0.10562  | 0.97435 | 0.81972 | 0.4194  | 0.34058 | 0.48374 | 0.92281 | 0.10065  | 0.24604   | 0.95964 |
| 6 | 137908627 | rs182948208      | 3 | 0.5156   | 1.5056 | 0.7728 | 2.9602  | 1.6202  | 0.65159  | 0.47609 | 1.0197   | 0.83696  | 0.90241  | 0.84688 | --       | --       | --       | --      | 2.2849  | 1.1817  | 0.45134 | 0.95318 | --      | --       | --        | --      |
| 6 | 137909307 | rs144411149      | 2 | 0.7024   | 1.2336 | 0.818  | 0.81415 | 1.8879  | 0.5711   | 0.32172 | --       | --       | --       | --      | --       | --       | --       | --      | --      | --      | --      | --      | 1.282   | 0.57442  | 0.17746   | 0.35681 |
| 6 | 137909350 | rs145019583      | 2 | 0.3386   | 7.9601 | 0.033  | --      | --      | --       | --      | --       | --       | --       | --      | 79.501   | 1.6242   | 0.32314  | 0.84962 | --      | --      | --      | --      | 1.0329  | 1.2296   | 0.96962   | 0.87061 |
| 6 | 137909763 | rs140936471      | 5 | 0.6816   | 1.1115 | 0.9388 | 0.70059 | 0.81584 | 0.39344  | 0.59899 | 1.5143   | 0.71181  | 0.14036  | 0.40147 | 1.2266   | 0.55219  | 0.38163  | 0.71071 | 1.5628  | 0.81653 | 0.32151 | 0.50132 | 0.99542 | 0.38323  | 0.82482   | 0.5071  |
| 6 | 137909764 | rs74938298       | 4 | 0.6991   | 1.1632 | 0.9943 | 0.95227 | 0.85236 | 0.74636  | 0.49593 | 1.2116   | 0.55734  | 0.33621  | 0.35028 | 1.3267   | 0.98889  | 0.46881  | 0.39609 | 1.1756  | 1.0428  | 0.65133 | 0.33965 | --      | --       | --        | --      |
| 6 | 137909940 | chr6:137909940:D | 4 | 0.8187   | 0.9057 | 0.8944 | 2.0809  | 1.3241  | 0.39148  | 0.64824 | 0.80543  | 0.54477  | 0.35172  | 0.41873 | 0.4218   | 1.9441   | 0.25612  | 0.44163 | --      | --      | --      | --      | 1.008   | 0.93217  | 0.47079   | 0.31823 |
| 6 | 137910065 | rs617175         | 5 | 0.2209   | 0.848  | 0.1531 | 1.1552  | 0.45673 | 0.81344  | 0.97103 | 0.82666  | 0.17445  | 0.18177  | 0.83445 | 0.51266  | 0.24952  | 0.005796 | 0.86655 | 1.4974  | 0.50887 | 0.18371 | 0.52031 | 0.94956 | 1.11407  | 0.39562   | 0.86133 |
| 6 | 137910350 | rs141892076      | 3 | 0.7608   | 0.8659 | 0.855  | --      | --      | --       | --      | 0.70037  | 0.70263  | 0.5094   | 0.73192 | 1.781    | 1.5611   | 0.41853  | 0.32473 | --      | --      | --      | --      | 0.92472 | 0.70105  | 0.87524   | 0.37106 |
| 6 | 137910359 | rs147108443      | 5 | 0.8554   | 0.9602 | 0.2645 | 1.4269  | 0.9196  | 0.76627  | 0.71858 | 1.1944   | 0.34419  | 0.50796  | 0.80054 | 1.8317   | 0.49606  | 0.16924  | 0.77753 | 0.81235 | 1.3842  | 0.83325 | 0.64766 | 0.65471 | 0.20961  | 0.041078  | 0.75216 |
| 6 | 137910404 | rs73776692       | 4 | 0.6603   | 1.196  | 0.8777 | 0.71126 | 1.0528  | 0.31883  | 0.80517 | 1.4851   | 0.59817  | 0.10727  | 0.40406 | --       | --       | --       | --      | 1.7748  | 1.0571  | 0.17379 | 0.42194 | 0.85059 | 0.83447  | 0.92022   | 0.35631 |
| 6 | 137910463 | rs182354120      | 2 | 0.3487   | 0.4334 | 0.804  | 5.0539  | 9.9377  | 0.027382 | 0.40443 | --       | --       | --       | --      | --       | --       | --       | --      | --      | --      | --      | --      | 0.4248  | 0.89598  | 0.11507   | 0.322   |
| 6 | 137910515 | rs76569775       | 5 | 0.5581   | 1.3109 | 0.7859 | 1.2942  | 1.9797  | 0.65896  | 0.41268 | 1.1157   | 0.75248  | 0.80995  | 0.50006 | 5.869    | 1.2844   | 0.217    | 0.6412  | 1.469   | 1.3465  | 0.35124 | 0.30491 | 0.83156 | 0.81602  | 0.78123   | 0.40361 |
| 6 | 137910755 | rs115037540      | 2 | 0.6831   | 0.4512 | 0.1477 | --      | --      | --       | --      | 2.6213   | 1.697    | 0.25802  | 0.45748 | 0.052043 | 2.1093   | 0.17365  | 0.89305 | --      | --      | --      | --      | --      | --       | --        | --      |
| 6 | 137910872 | rs74355910       | 5 | 0.4301   | 1.0792 | 0.3499 | 1.5852  | 0.35948 | 0.077521 | 0.72653 | 0.89019  | 0.165    | 0.31507  | 0.74013 | 1.1792   | 0.35142  | 0.38375  | 0.70634 | 1.8808  | 0.40713 | 0.00318 | 0.51806 | 1.0621  | 0.11244  | 0.69964   | 0.77834 |
| 6 | 137911035 | rs6908537        | 5 | 0.9597   | 1.0039 | 0.3396 | 0.81513 | 0.27112 | 0.26817  | 0.96875 | 1.2395   | 0.13197  | 0.063943 | 0.82051 | 0.77503  | 0.23088  | 0.14039  | 0.95968 | 0.9229  | 0.35565 | 0.60974 | 0.44502 | 0.97922 | 0.091815 | 0.72507   | 0.95209 |
| 6 | 137911316 | rs75343270       | 4 | 0.8271   | 0.9105 | 0.8952 | 2.0833  | 1.3268  | 0.38916  | 0.64654 | 0.80995  | 0.54102  | 0.36046  | 0.41808 | 0.42247  | 1.9521   | 0.25284  | 0.43938 | --      | --      | --      | --      | 1.0174  | 0.92069  | 0.44284   | 0.32009 |
| 6 | 137911413 | rs6931946        | 5 | 0.1592   | 0.9548 | 0.834  | 1.0157  | 0.13986 | 0.92372  | 0.98253 | 0.92002  | 0.064122 | 0.14733  | 0.90686 | 0.88725  | 0.1056   | 0.20022  | 0.97574 | 0.9073  | 0.18959 | 0.26945 | 0.45363 | 0.98089 | 0.044172 | 0.72793   | 0.97507 |
| 6 | 137911517 | rs34536324       | 5 | 0.007051 | 1.1174 | 0.6682 | 1.3279  | 1.8441  | 0.086767 | 0.85399 | 1.082    | 0.084609 | 0.29259  | 0.90392 | 1.0787   | 0.11596  | 0.50296  | 0.97549 | 0.82239 | 0.28529 | 0.08025 | 0.40261 | 1.1531  | 0.054784 | 0.0061822 | 0.96806 |
| 6 | 137911518 | rs139072651      | 4 | 0.04139  | 1.4765 | 0.4818 | 0.83908 | 0.6629  | 0.76891  | 0.95929 | 2.1008   | 0.35993  | 0.027795 | 0.89223 | 0.70794  | 0.73875  | 0.72433  | 0.89869 | --      | --      | --      | --      | 1.4374  | 0.25344  | 0.044229  | 0.93522 |
| 6 | 137911711 | rs187417965      | 2 | 0.2825   | 2.0328 | 0.6018 | --      | --      | --       | --      | --       | --       | --       | --      | 6.9073   | 2.1716   | 0.65634  | 0.6684  | --      | --      | --      | --      | 2.2689  | 0.69284  | 0.43102   | 0.69611 |
| 6 | 137911899 | rs659512         | 5 | 0.292    | 1.0309 | 0.651  | 1.0172  | 1.02467 | 0.93905  | 0.93786 | 1.0177   | 0.056619 | 0.73829  | 1       | 0.94046  | 0.085913 | 0.42299  | 1       | 0.91201 | 0.16692 | 0.23599 | 0.45715 | 1.0657  | 0.039123 | 0.10811   | 1       |
| 6 | 137911927 | rs34464392       | 4 | 0.324    | 0.7973 | 0.749  | 0.39964 | 1.0727  | 0.24919  | 0.59891 | 1.2766   | 0.55807  | 0.37209  | 0.48484 | 0.80363  | 0.45284  | 0.40281  | 0.88345 | --      | --      | --      | --      | 0.72493 | 0.31636  | 0.15434   | 0.70257 |
| 6 | 137912161 | rs74467206       | 4 | 0.7696   | 0.8611 | 0.7917 | 2.5115  | 1.5038  | 0.30729  | 0.68597 | 0.84955  | 0.6608   | 0.57967  | 0.42968 | 0.21839  | 1.8874   | 0.1572   | 0.53023 | --      | --      | --      | --      | 0.80301 | 1.1032   | 0.9559    | 0.32259 |
| 6 | 137912455 | rs13214321       | 5 | 0.7438   | 0.9686 | 0.2661 | 0.85865 | 0.30505 | 0.38458  | 0.98076 | 1.2763   | 0.15178  | 0.036499 | 0.76548 | 0.73129  | 0.24579  | 0.10509  | 0.98498 | 0.99744 | 0.40504 | 0.95595 | 0.44474 | 0.90622 | 0.10007  | 0.19896   | 0.96198 |
| 6 | 137912501 | rs1589136        | 5 | 0.01208  | 1.1088 | 0.6789 | 1.3167  | 0.18486 | 0.094582 | 0.83855 | 1.0798   | 0.084496 | 0.29763  | 0.89053 | 1.0778   | 0.11591  | 0.49833  | 0.96614 | 0.81579 | 0.27779 | 0.06383 | 0.41489 | 1.1247  | 0.054708 | 0.0090803 | 0.95597 |
| 6 | 137912650 | rs6920073        | 3 | 0.9055   | 0.9508 | 0.9895 | 1.1478  | 1.3892  | 0.89782  | 0.30745 | 0.91846  | 0.70179  | 0.77148  | 0.37189 | --       | --       | --       | --      | --      | --      | --      | --      | 0.94221 | 0.57775  | 0.83535   | 0.41769 |
| 6 | 137912731 | rs1589137        | 5 | 0.007104 | 1.1173 | 0.6684 | 1.3277  | 1.8441  | 0.086905 | 0.85393 | 1.0818   | 0.084609 | 0.29331  | 0.90388 | 1.0788   | 0.11598  | 0.50251  | 0.97518 | 0.82239 | 0.28529 | 0.08026 | 0.40261 | 1.137   | 0.054793 | 0.0061829 | 0.9678  |
| 6 | 137912819 | rs112638534      | 3 | 0.1534   | 0.2334 | 0.4672 | 0.04575 | 1.9421  | 0.44593  | 0.71829 | --       | --       | 0.11265  | 2.0692  | 0.206    | 0.82353  | --       | --      | --      | --      | --      | --      | 0.8544  | 1.4681   | 0.93861   | 0.48176 |
| 6 | 137912937 | rs140857282      | 4 | 0.04136  | 1.4765 | 0.4823 | 0.83871 | 0.66283 | 0.76851  | 0.95881 | 2.1009   | 0.35993  | 0.027798 | 0.89231 | 0.77268  | 0.73825  | 0.7265   | 0.8987  | --      | --      | --      | --      | 1.4533  | 0.2534   | 0.044261  | 0.93497 |
| 6 | 137913073 | rs144701642      | 5 | 0.8671   | 1.0457 | 0.9868 | 0.63687 | 1.0891  | 0.38608  | 0.45211 | 1.0145   | 0.52995  | 0.97671  | 0.41905 | 0.80188  | 1.1456   | 0.4451   | 0.35158 | 0.99044 | 1.0231  | 0.99515 | 0.3773  | 1.1547  | 0.35642  | 0.48872   | 0.43829 |
| 6 | 137913271 | chr6:137913271:I | 5 | 0.007177 | 1.1172 | 0.6687 | 1.3289  | 1.8449  | 0.08593  | 0.8529  | 1.0813   | 0.084625 | 0.29485  | 0.90175 | 1.0792   | 0.11602  | 0.49907  | 0.97302 | 0.82314 | 0.28566 | 0.08139 | 0.40187 | 1.1368  | 0.054821 | 0.0061368 | 0.96858 |
| 6 | 137913328 | rs191813312      | 3 | 0.7184   | 1.2923 | 0.9389 | --      | --      | --       | --      | 1.1935   | 1.0622   | 0.59473  | 0.30795 | --       | --       | --       | --      | 2.6165  | 2.112   | 0.08693 | 0.3184  | 1.168   | 1.0739   | 0.02999   | 0.305   |
| 6 | 137913590 | rs9494826        | 2 | 0.9844   | 0.9782 | 0.843  | --      | --      | --       | --      | 0.81287  | 1.4617   | 0.72632  | 0.42148 | --       | --       | --       | --      | --      | --      | --      | --      | --      | --       | --        | --      |
| 6 | 137913717 | rs35990261       | 4 | 0.2803   | 1.2202 | 0.7898 | 1.3297  | 0.84149 | 0.29715  | 0.46453 | 1.0998   | 0.35765  | 0.61085  | 0.55131 | 0.67603  | 0.68525  | 0.11615  | 0.46382 | --      | --      | --      | --      | 1.3591  | 0.23525  | 0.025697  | 0.54012 |
| 6 | 137913784 | rs145320897      | 4 | 0.5787   | 1.1799 | 0.9693 | 2.1269  | 1.2173  | 0.06045  | 0.46489 | 1.139    | 0.48565  | 0.66711  | 0.64115 | 1.1308   | 0.8976   | 0.85502  | 0.40015 | --      | --      | --      | --      | 1.1357  | 0.4424   | 0.29258   | 0.39024 |
| 6 | 137913872 | rs137893450      | 4 | 0.4486   | 0.8956 | 0.9223 | 1.0915  | 0.60414 | 0.84801  | 0.6679  | 0.92112  | 0.31814  | 0.65934  | 0.59389 | 1.2213   | 0.85954  | 0.57316  | 0.55783 | --      | --      | --      | --      | 0.84847 | 0.17762  | 0.073535  | 0.67577 |
| 6 | 137913911 | rs58187029       | 5 | 0.9485   | 0.9074 | 0.5675 | 0.76196 | 1.17365 | 0.2595   | 0.97232 | 0.97185  | 0.081771 | 0.73636  | 0.85524 | 1.048    | 0.11935  | 0.65938  | 0.97159 | 1.0846  | 0.2412  | 0.47389 | 0.45677 | 1.0187  | 0.05339  | 0.9871    | 0.96972 |
| 6 | 137913937 | rs144148774      | 4 | 0.6927   | 1.0055 | 0.0549 | 0.72919 | 1.0602  | 0.87782  | 0.53598 | 0.888328 |          |          |         |          |          |          |         |         |         |         |         |         |          |           |         |

|   |           |                  |   |          |        |        |         |         |          |         |         |          |          |         |         |         |         |         |         |         |         |         |         |          |           |         |         |
|---|-----------|------------------|---|----------|--------|--------|---------|---------|----------|---------|---------|----------|----------|---------|---------|---------|---------|---------|---------|---------|---------|---------|---------|----------|-----------|---------|---------|
| 6 | 137919185 | rs113110017      | 3 | 0.1587   | 0.2315 | 0.4755 | 0.0516  | 1.9865  | 0.46362  | 0.73838 | --      | --       | --       | --      | 0.10039 | 2.0675  | 0.20961 | 0.84991 | --      | --      | --      | 0.85523 | 1.5064  | 0.92624  | 0.48759   |         |         |
| 6 | 137919415 | rs2014631        | 5 | 0.2498   | 0.9628 | 0.8863 | 1.0205  | 0.13952 | 0.90997  | 0.98554 | 0.94066 | 0.064308 | 0.28215  | 0.91581 | 0.89353 | 0.10546 | 0.22723 | 0.97935 | 0.90072 | 0.20176 | 0.21286 | 0.41349 | 0.98361 | 0.044152 | 0.76353   | 0.97841 |         |
| 6 | 137919453 | rs497924         | 5 | 0.1671   | 0.9554 | 0.7919 | 1.0245  | 0.14015 | 0.86678  | 0.97227 | 0.91768 | 0.064406 | 0.13385  | 0.8976  | 0.88264 | 0.10594 | 0.1787  | 0.96567 | 0.90775 | 0.18944 | 0.27236 | 0.45419 | 0.98332 | 0.044347 | 0.77487   | 0.95604 |         |
| 6 | 137919465 | rs184850978      | 3 | 0.4588   | 0.6925 | 0.9228 | --      | --      | --       | --      | --      | --       | --       | --      | 1.0055  | 1.2345  | 0.9372  | 0.4943  | 0.78218 | 1.0089  | 0.69917 | 0.68767 | 0.59584 | 0.64212  | 0.22452   | 0.36889 |         |
| 6 | 137919709 | rs34718616       | 5 | 0.003253 | 1.1273 | 0.7697 | 1.3157  | 0.17823 | 0.098902 | 0.88391 | 1.1146  | 0.082236 | 0.14672  | 0.91703 | 1.0766  | 0.11611 | 0.51564 | 0.97387 | 0.87706 | 0.27248 | 0.23468 | 0.39273 | 1.1395  | 0.054558 | 0.0048434 | 0.96716 |         |
| 6 | 137919831 | rs76181877       | 3 | 0.1615   | 0.2343 | 0.4828 | 0.0534  | 1.9895  | 0.46508  | 0.73905 | --      | --       | --       | --      | 0.10039 | 2.0675  | 0.20961 | 0.84991 | --      | --      | --      | --      | 1.5002  | 0.93657  | 0.49038   |         |         |
| 6 | 137919837 | rs17261591       | 5 | 0.7865   | 0.9891 | 0.4572 | 0.76774 | 0.17382 | 0.29461  | 0.98116 | 0.92675 | 0.083888 | 0.33335  | 0.88442 | 1.0529  | 0.11917 | 0.62898 | 0.98138 | 1.125   | 0.238   | 0.30908 | 0.47047 | 1.0205  | 0.053342 | 0.97678   | 0.98098 |         |
| 6 | 137919972 | rs58014601       | 4 | 0.7696   | 0.8623 | 0.7896 | 2.504   | 1.5185  | 0.2946   | 0.66758 | 0.85444 | 0.65751  | 0.58737  | 0.42528 | 0.20398 | 1.9415  | 0.10677 | 0.50464 | --      | --      | --      | --      | 0.80759 | 1.0565   | 0.92112   | 0.33639 |         |
| 6 | 137920125 | rs61535882       | 5 | 0.7393   | 0.9867 | 0.466  | 0.78065 | 0.17412 | 0.33468  | 0.97785 | 0.91542 | 0.083798 | 0.2517   | 0.87785 | 1.0498  | 0.1191  | 0.64075 | 0.98016 | 1.126   | 0.23715 | 0.29815 | 0.46308 | 1.02    | 0.053336 | 0.98469   | 0.97564 |         |
| 6 | 137920217 | rs526077         | 5 | 0.179    | 0.9539 | 0.5549 | 0.82727 | 0.15143 | 0.26847  | 1       | 0.97858 | 0.067703 | 0.76949  | 1       | 0.83567 | 0.1042  | 0.07375 | 1       | 0.95386 | 0.21881 | 0.62648 | 0.44436 | 0.98238 | 0.047877 | 0.98259   | 1       |         |
| 6 | 137920488 | rs185325038      | 2 | 0.5236   | 2.583  | 1.0242 | --      | --      | --       | --      | --      | --       | --       | --      | 14.772  | 1.6235  | 0.31584 | 0.76504 | --      | --      | --      | --      | 0.72566 | 1.0986   | 0.64331   | 0.551   |         |
| 6 | 137920683 | rs530607         | 5 | 0.2052   | 0.9588 | 0.7602 | 1.031   | 0.14138 | 0.81821  | 0.96316 | 0.91815 | 0.064718 | 0.13604  | 0.89165 | 0.88155 | 0.10703 | 0.17133 | 0.95816 | 0.91233 | 0.19059 | 0.30279 | 0.45188 | 0.98865 | 0.044657 | 0.83859   | 0.9575  |         |
| 6 | 137920712 | rs74774704       | 4 | 0.812    | 0.9026 | 0.89   | 2.1136  | 1.3432  | 0.37884  | 0.6448  | 0.80463 | 0.54163  | 0.34836  | 0.42016 | 0.40734 | 1.9455  | 0.24042 | 0.44617 | --      | --      | --      | --      | 1.0101  | 0.93039  | 0.45762   | 0.31774 |         |
| 6 | 137920720 | rs2876371        | 5 | 0.7977   | 0.9897 | 0.4537 | 0.76794 | 0.1738  | 0.29525  | 0.98171 | 0.92692 | 0.083869 | 0.33512  | 0.88537 | 1.053   | 0.11927 | 0.62823 | 0.98025 | 1.1282  | 0.23795 | 0.29709 | 0.47089 | 1.0213  | 0.053326 | 0.98578   | 0.98189 |         |
| 6 | 137920726 | rs77004057       | 4 | 0.7759   | 0.8654 | 0.7982 | 2.4802  | 1.5148  | 0.30066  | 0.66664 | 0.85416 | 0.6565   | 0.5879   | 0.42732 | 0.21518 | 1.9188  | 0.12379 | 0.50425 | --      | --      | --      | --      | 0.81526 | 1.0853   | 0.90576   | 0.32237 |         |
| 6 | 137920768 | rs149067980      | 3 | 0.2816   | 1.5664 | 0.9611 | --      | --      | --       | --      | 1.482   | 0.89071  | 0.29297  | 0.41457 | --      | --      | --      | --      | --      | 1.0175  | 1.7041  | 0.99938 | 0.64153 | 1.651    | 0.49075   | 0.91564 | 0.65101 |
| 6 | 137921025 | rs115455865      | 4 | 0.7181   | 1.1551 | 0.7737 | --      | --      | --       | --      | 2.0902  | 0.6916   | 0.096848 | 0.56682 | 0.95641 | 1.5245  | 0.91911 | 0.46901 | 0.81045 | 0.81699 | 0.60372 | 0.55979 | 0.87381 | 0.66678  | 0.97849   | 0.44141 |         |
| 6 | 137921184 | rs78258830       | 5 | 0.9957   | 0.9628 | 0.5849 | 0.77225 | 0.17399 | 0.30633  | 0.98382 | 0.96803 | 0.08744  | 0.69939  | 0.86596 | 1.0587  | 0.11946 | 0.59905 | 0.98215 | 1.0817  | 0.24694 | 0.50381 | 0.45693 | 1.0221  | 0.053506 | 0.99885   | 0.98029 |         |
| 6 | 137921217 | rs188001249      | 3 | 0.7409   | 0.8787 | 0.5837 | --      | --      | --       | --      | 0.81593 | 0.71762  | 0.57869  | 0.50761 | --      | --      | --      | --      | 0.24771 | 1.3429  | 1.8035  | 0.62505 | 1.0833  | 0.49742  | 0.78584   | 0.5365  |         |
| 6 | 137921226 | chr6:137921226:D | 3 | 0.2625   | 4.9944 | 0.0178 | --      | --      | --       | --      | 1.5165  | 1.0268   | 0.57089  | 0.63575 | 169.39  | 1.575   | 0.30472 | 0.84756 | --      | --      | --      | --      | 0.90029 | 1.1711   | 0.99183   | 0.64011 |         |
| 6 | 137921247 | rs77837872       | 4 | 0.5361   | 1.1584 | 0.8787 | 2.1687  | 0.88416 | 0.061204 | 0.56628 | 1.0341  | 0.39682  | 0.90649  | 0.62364 | 1.3659  | 0.65412 | 0.59705 | 0.72329 | --      | --      | --      | --      | 1.0906  | 0.35939  | 0.71174   | 0.57865 |         |
| 6 | 137921253 | rs78296787       | 4 | 0.7474   | 0.8479 | 0.7783 | 2.5266  | 1.5131  | 0.30352  | 0.68557 | 0.84026 | 0.6592   | 0.43118  | 0.20308 | 1.8933  | 0.1446  | 0.53741 | --      | --      | --      | --      | --      | 0.78851 | 1.1235   | 0.99883   | 0.32682 |         |
| 6 | 137921564 | rs7772417        | 5 | 0.7959   | 0.9758 | 0.2824 | 0.85641 | 0.30284 | 0.35378  | 0.96413 | 1.2795  | 0.1517   | 0.033526 | 0.76004 | 0.73967 | 0.2453  | 0.11449 | 0.97539 | 1.0021  | 0.40439 | 0.97462 | 0.44393 | 0.91703 | 0.099114 | 0.24104   | 0.95639 |         |
| 6 | 137921657 | rs58041149       | 3 | 0.1683   | 0.2404 | 0.4901 | 0.05396 | 1.9747  | 0.46064  | 0.72773 | --      | --       | --       | --      | 0.111   | 2.0701  | 0.20577 | 0.82573 | --      | --      | --      | --      | 0.85439 | 1.5      | 0.93121   | 0.48353 |         |
| 6 | 137921732 | rs192719174      | 5 | 0.9082   | 1.0316 | 1.0474 | 1.2824  | 0.8826  | 0.97581  | 0.7458  | 1.2735  | 0.3406   | 0.38653  | 0.81787 | 2.0169  | 0.47631 | 0.11152 | 0.78859 | 0.2822  | 1.8477  | 0.24476 | 0.4643  | 0.65069 | 0.21228  | 0.063064  | 0.818   |         |
| 6 | 137921918 | rs146022906      | 4 | 0.5563   | 1.2308 | 0.7125 | --      | --      | --       | --      | 0.67359 | 0.78959  | 0.43592  | 0.61846 | 0.66193 | 1.073   | 0.61758 | 0.67554 | 1.2958  | 1.1185  | 0.6631  | 0.54511 | 1.6751  | 0.45872  | 0.11817   | 0.94297 |         |
| 6 | 137922039 | rs7759188        | 5 | 0.8057   | 0.9807 | 0.3736 | 0.96084 | 0.30225 | 0.63375  | 0.92227 | 1.2509  | 0.14972  | 0.043665 | 0.74257 | 0.75328 | 0.24559 | 0.323   | 0.93604 | 0.99949 | 0.3929  | 0.97252 | 0.44305 | 0.91911 | 0.097138 | 0.16841   | 0.61969 |         |
| 6 | 137922096 | rs77152647       | 5 | 0.9548   | 1.0079 | 0.9569 | 1.4614  | 0.70698 | 0.16912  | 0.54889 | 0.88542 | 0.28637  | 0.49603  | 0.62771 | 1.1795  | 0.74117 | 0.5997  | 0.47203 | 1.378   | 0.87648 | 0.32714 | 0.38153 | 1.0122  | 0.17136  | 0.72022   | 0.70578 |         |
| 6 | 137922289 | rs149594347      | 4 | 0.04117  | 1.4762 | 0.4899 | 0.82959 | 0.66085 | 0.75607  | 0.94862 | 2.0952  | 0.35967  | 0.028605 | 0.89432 | 1.7964  | 0.73345 | 0.75851 | 0.8935  | --      | --      | --      | --      | 1.4536  | 0.25312  | 0.04281   | 0.92881 |         |
| 6 | 137922391 | rs116855070      | 5 | 0.9847   | 0.9777 | 0.9421 | 1.2118  | 0.52418 | 0.68273  | 0.4722  | 1.1007  | 0.22854  | 0.44074  | 0.56555 | 1.1126  | 0.34977 | 0.66722 | 0.58012 | 0.8002  | 0.58323 | 0.25724 | 0.34972 | 0.92638 | 0.16194  | 0.49395   | 0.56349 |         |
| 6 | 137922596 | rs114219144      | 2 | 0.8497   | 1.1728 | 0.3982 | 6.2817  | 2.1573  | 0.22132  | 0.54395 | 0.86826 | 0.91309  | 0.72918  | 0.85251 | --      | --      | --      | --      | --      | --      | --      | --      | --      | --       | --        | --      |         |
| 6 | 137922631 | rs193203103      | 3 | 0.5225   | 1.4929 | 0.7638 | 2.9884  | 1.6196  | 0.65186  | 0.48018 | 1.0069  | 0.83078  | 0.88829  | 0.84212 | --      | --      | --      | --      | --      | 2.2872  | 1.1808  | 0.45089 | 0.95385 | --       | --        | --      |         |
| 6 | 137922647 | rs148720375      | 4 | 0.1729   | 0.4364 | 0.0138 | 0.03253 | 0.94704 | 0.045107 | 0.60325 | 1.2467  | 0.6823   | 0.48782  | 0.42869 | 0.78455 | 0.70365 | 0.56297 | 0.72712 | --      | --      | --      | --      | 0.59247 | 0.38147  | 0.048626  | 0.63901 |         |
| 6 | 137922884 | rs141391658      | 3 | 0.1447   | 0.5779 | 0.9993 | --      | --      | --       | --      | 0.57952 | 0.50782  | 0.14424  | 0.69957 | 0.55663 | 1.0794  | 0.24129 | 0.63737 | --      | --      | --      | --      | 0.58323 | 0.65376  | 0.10985   | 0.50605 |         |
| 6 | 137922827 | rs646807         | 5 | 0.2593   | 0.961  | 0.8951 | 1.0712  | 0.15127 | 0.58438  | 0.93644 | 0.96144 | 0.068713 | 0.49602  | 0.88481 | 0.9072  | 0.11222 | 0.32357 | 0.93803 | 0.85473 | 0.21238 | 0.08061 | 0.41674 | 0.96599 | 0.04735  | 0.27554   | 0.93756 |         |
| 6 | 137923293 | rs78878536       | 3 | 0.2734   | 0.3016 | 0.6431 | 0.13147 | 2.0921  | 0.50691  | 0.74168 | --      | --       | --       | --      | 0.10157 | 2.1438  | 0.15903 | 0.77855 | --      | --      | --      | --      | 0.90309 | 1.6037   | 0.84851   | 0.4337  |         |
| 6 | 137923369 | rs189687263      | 2 | 0.5683   | 0.7298 | 0.6231 | --      | --      | --       | --      | 1.0815  | 0.97217  | 0.88918  | 0.71057 | 0.60524 | 0.67061 | 0.58282 | 0.95346 | --      | --      | --      | --      | --      | --       | --        | --      |         |
| 6 | 137923390 | rs9376287        | 5 | 0.02521  | 0.92   | 0.669  | 0.82997 | 0.15789 | 0.29905  | 1       | 0.98015 | 0.07578  | 0.7333   | 0.9307  | 0.94096 | 0.1083  | 0.56636 | 1       | 1.1046  | 0.20819 | 0.2725  | 0.44486 | 0.89039 | 0.050115 | 0.093241  | 1       |         |
| 6 | 137923896 | rs9494829        | 2 | 0.9097   | 1.1104 | 0.5311 | --      | --      | --       | --      | 0.75089 | 1.1147   | 0.60086  | 0.51728 | --      | --      | --      | --      | 1.2614  | 1.6482  | 0.0875  | 0.3595  | --      | --       | --        | --      |         |
| 6 | 137923908 | rs9484071        | 3 | 0.847    | 1.1526 | 0.9714 | 1.383   | 1.4753  | 0.61651  | 0.43891 | 0.94457 | 1.1095   | 0.90243  | 0.48194 | --      | --      | --      | --      | 1.3204  | 1.3199  | 0.59754 | 0.36496 | --      | --       | --        | --      |         |
| 6 | 137924067 | rs72975369       | 4 | 0.08309  | 1.3665 | 0.7019 | 1.0052  | 0.58285 | 0.98201  | 0.88595 | 1.876   | 0.35272  | 0.04461  | 0.84745 | 0.94375 | 0.68873 | 0.93316 | 0.82953 | --      | --      | --      | --      | 1.3015  | 0.23758  | 0.098395  | 0.87188 |         |
| 6 | 137924069 | rs146614571      | 4 | 0.72     | 1.101  | 0.9838 | 0.96358 | 1.244   | 0.77105  | 0.40472 | 0.94421 | 0.49885  | 0.8309   | 0.46523 | 1.1923  | 0.70787 | 0.59151 | 0.41523 | --      | --      | --      | --      | 1.1873  | 0.37223  | 0.086338  | 0.47086 |         |
| 6 | 137924218 | rs10080841       | 5 | 0.7723   | 0.9885 | 0.835  | 0.89286 | 0.1781  | 0.7718   | 1       | 0.94676 | 0.08001  | 0.51766  | 0.96768 | 1.0718  | 0.1206  | 0.5076  | 1       | 1.1338  | 0.223   | 0.3036  | 0.52104 | 0.99308 | 0.053599 | 0.54763   | 1       |         |
| 6 | 137924265 | rs1336512        | 5 | 0.3297   | 0.6884 | 0.7619 | 0.88812 | 0.14697 | 0.30815  | 0.96055 | 1.0281  | 0.064067 | 0.55869  | 1       | 0.96969 |         |         |         |         |         |         |         |         |          |           |         |         |

|   |           |                  |   |         |        |        |         |         |          |         |         |          |          |         |         |          |          |         |         |         |         |         |         |           |           |         |
|---|-----------|------------------|---|---------|--------|--------|---------|---------|----------|---------|---------|----------|----------|---------|---------|----------|----------|---------|---------|---------|---------|---------|---------|-----------|-----------|---------|
| 6 | 137928787 | rs7768002        | 5 | 0.4397  | 1.0476 | 0.7857 | 1.3339  | 0.26534 | 0.48163  | 0.97996 | 1.1162  | 0.12598  | 0.28106  | 0.84048 | 0.92435 | 0.16591  | 0.61802  | 0.98201 | 0.97279 | 0.36551 | 0.88418 | 0.43863 | 1.032   | 0.080251  | 0.84208   | 0.982   |
| 6 | 137928983 | rs74756249       | 2 | 0.5881  | 1.7865 | 0.7553 | --      | --      | --       | 2.2491  | 1.2015  | 0.34522  | 0.68354  | --      | --      | --       | --       | --      | --      | --      | --      | --      | 1.1009  | 1.887     | 0.58792   | 0.43389 |
| 6 | 137929077 | rs76190598       | 5 | 0.3082  | 1.5337 | 0.9091 | 0.90784 | 1.1361  | 0.96844  | 0.53258 | 1.2951  | 1.0231   | 0.64593  | 0.5411  | 0.43929 | 1.9237   | 0.36161  | 0.46657 | 1.2988  | 1.306   | 0.57168 | 0.32934 | 2.1214  | 0.5678    | 0.0002085 | 0.59641 |
| 6 | 137929165 | rs145674989      | 5 | 0.1826  | 0.749  | 0.991  | 0.61674 | 1.1111  | 0.21553  | 0.31514 | 0.8078  | 0.51844  | 0.36457  | 0.4527  | 0.87032 | 0.62928  | 0.59522  | 0.61127 | 0.91366 | 0.65131 | 0.8346  | 0.71482 | 0.69007 | 0.29047   | 0.12353   | 0.56914 |
| 6 | 137929300 | rs138228669      | 2 | 0.7449  | 1.2385 | 0.9796 | 1.316   | 2.4632  | 0.3078   | 0.40569 | --      | --       | --       | --      | --      | --       | --       | --      | --      | --      | --      | --      | 1.2327  | 0.6819    | 0.32978   | 0.33352 |
| 6 | 137929358 | rs114221981      | 2 | 0.5305  | 5.0388 | 0.1149 | 54.297  | 2.0735  | 0.25478  | 0.94606 | --      | --       | --       | --      | --      | --       | --       | --      | --      | --      | --      | --      | 0.30765 | 2.5427    | 0.47786   | 0.50938 |
| 6 | 137929411 | rs7749086        | 5 | 0.4397  | 1.0476 | 0.7896 | 1.3292  | 0.26514 | 0.48986  | 0.97841 | 1.1142  | 0.12606  | 0.2884   | 0.83976 | 0.92211 | 0.16572  | 0.60791  | 0.98391 | 0.9735  | 0.36551 | 0.88756 | 0.4386  | 1.0337  | 0.080291  | 0.8589    | 0.98175 |
| 6 | 137929417 | rs7748826        | 5 | 0.4408  | 1.0475 | 0.7915 | 1.3288  | 0.26515 | 0.4905   | 0.9787  | 1.1143  | 0.12608  | 0.28793  | 0.8394  | 0.92321 | 0.1657   | 0.61316  | 0.98395 | 0.97363 | 0.36567 | 0.88843 | 0.43877 | 1.0332  | 0.080257  | 0.85164   | 0.98222 |
| 6 | 137929810 | rs569420         | 5 | 0.5991  | 0.9798 | 0.2344 | 1.1831  | 0.1312  | 0.16181  | 0.91962 | 0.99413 | 0.055041 | 0.85957  | 1       | 0.86288 | 0.088451 | 0.063949 | 0.98063 | 0.82901 | 0.1606  | 0.02602 | 0.53889 | 1.0018  | 0.038552  | 0.7717    | 0.97364 |
| 6 | 137930272 | rs78249719       | 5 | 0.9166  | 0.9957 | 0.8488 | 0.89462 | 0.185   | 0.80929  | 0.96603 | 0.95157 | 0.080918 | 0.56942  | 0.97    | 1.0578  | 0.12296  | 0.58033  | 0.99171 | 1.1632  | 0.23115 | 0.22599 | 0.52164 | 1.0052  | 0.054813  | 0.69716   | 0.98006 |
| 6 | 137930302 | rs6917072        | 5 | 0.3478  | 1.0574 | 0.8451 | 1.3287  | 0.26045 | 0.49673  | 1       | 1.1152  | 0.1262   | 0.28407  | 0.83844 | 0.95819 | 0.16248  | 0.79351  | 1       | 0.97863 | 0.36571 | 0.91374 | 0.43883 | 1.0417  | 0.079077  | 0.98948   | 1       |
| 6 | 137930558 | rs1150588        | 5 | 0.8649  | 0.9931 | 0.8587 | 0.89823 | 0.18427 | 0.79826  | 0.94874 | 0.95595 | 0.80363  | 0.6012   | 0.96091 | 1.0573  | 0.1232   | 0.58058  | 0.98176 | 1.1678  | 0.22284 | 0.20763 | 0.52822 | 0.99749 | 0.054825  | 0.60028   | 0.96965 |
| 6 | 137930667 | rs75905992       | 3 | 0.5307  | 0.7667 | 0.8044 | --      | --      | --       | --      | 0.90277 | 0.70007  | 0.80416  | 0.68006 | --      | --       | --       | --      | 1.6625  | 1.5623  | 0.33992 | 0.39777 | 0.62252 | 0.56602   | 0.35414   | 0.71808 |
| 6 | 137930669 | rs692129         | 5 | 0.4436  | 1.0473 | 0.7772 | 1.3339  | 0.26528 | 0.4833   | 0.98116 | 1.1197  | 0.12735  | 0.26626  | 0.83395 | 0.92241 | 0.16555  | 0.61063  | 0.98562 | 0.97041 | 0.36598 | 0.87146 | 0.44284 | 1.0315  | 0.080385  | 0.83199   | 0.98182 |
| 6 | 137930725 | chr6:137930725:D | 5 | 0.7493  | 0.987  | 0.8847 | 0.92221 | 0.18336 | 0.88484  | 0.95144 | 0.9457  | 0.080023 | 0.50793  | 0.96517 | 1.0691  | 0.12289  | 0.51177  | 0.97795 | 1.1202  | 0.22676 | 0.33482 | 0.49912 | 0.9899  | 0.055242  | 0.51104   | 0.96339 |
| 6 | 137930838 | rs184322660      | 2 | 0.6672  | 0.6947 | 0.4108 | --      | --      | --       | --      | 0.25691 | 1.4766   | 0.12835  | 0.52034 | --      | --       | --       | --      | --      | --      | --      | --      | 1.1315  | 1.034     | 0.92102   | 0.48281 |
| 6 | 137931117 | rs1572045        | 5 | 0.8534  | 1.0064 | 0.8686 | 1.0525  | 0.14657 | 0.71767  | 0.9185  | 0.94711 | 0.065902 | 0.41504  | 1       | 1.0085  | 1.0531   | 0.97641  | 0.97394 | 0.9923  | 0.21583 | 0.94364 | 0.45577 | 1.0328  | 0.046508  | 0.13323   | 0.96149 |
| 6 | 137931147 | rs2068008        | 5 | 0.8778  | 1.0566 | 0.5921 | 0.63108 | 1.4258  | 0.44381  | 0.52102 | 0.6099  | 0.57574  | 0.28666  | 0.77969 | 0.27588 | 1.9937   | 0.1211   | 0.49464 | 1.4275  | 1.2224  | 0.36654 | 0.31041 | 1.9386  | 0.54442   | 0.0019073 | 0.56757 |
| 6 | 137931182 | rs112860726      | 2 | 0.6151  | 1.6288 | 0.8324 | --      | --      | --       | --      | 1.9286  | 1.2563   | 0.41392  | 0.67751 | --      | --       | --       | --      | --      | --      | --      | --      | 1.2691  | 1.5266    | 0.44538   | 0.45908 |
| 6 | 137931251 | rs74592561       | 2 | 0.7632  | 2.1728 | 0.049  | 33.577  | 2.0608  | 0.26668  | 0.9214  | --      | --       | --       | --      | --      | --       | --       | --      | --      | --      | --      | --      | 0.19256 | 1.6198    | 0.32645   | 0.4393  |
| 6 | 137931565 | rs958000         | 5 | 0.7833  | 0.9888 | 0.9047 | 0.92857 | 0.18383 | 0.91226  | 0.95212 | 0.94902 | 0.080346 | 0.53902  | 0.96469 | 1.0666  | 0.12342  | 0.52956  | 0.98379 | 1.114   | 0.22702 | 0.36185 | 0.50068 | 0.99162 | 0.055517  | 0.53836   | 0.96387 |
| 6 | 137931847 | rs116969100      | 2 | 0.5282  | 1.7835 | 0.233  | --      | --      | --       | --      | --      | --       | --       | 0.31009 | 1.7787  | 0.16368  | 0.5324   | --      | --      | --      | --      | 2.8852  | 0.57831 | 0.0011648 | 0.73451   |         |
| 6 | 137932015 | rs76794554       | 3 | 0.241   | 2.2912 | 0.3796 | --      | --      | --       | --      | 2.4534  | 1.0629   | 0.31123  | 0.74309 | 12.054  | 1.5558   | 0.30297  | 0.76454 | --      | --      | --      | --      | 0.79062 | 1.1939    | 0.80621   | 0.6314  |
| 6 | 137932155 | rs16799          | 5 | 0.1348  | 1.0921 | 0.6232 | 1.3175  | 0.26541 | 0.49675  | 0.96776 | 1.2147  | 0.11402  | 0.085523 | 1       | 0.92135 | 0.16239  | 0.59447  | 0.97328 | 0.94181 | 0.43655 | 0.68227 | 0.3155  | 1.0645  | 0.080099  | 0.79806   | 0.97019 |
| 6 | 137932389 | rs77356894       | 5 | 0.9347  | 1.0298 | 0.6245 | 0.68091 | 1.4183  | 0.48168  | 0.52237 | 0.59837 | 0.5786   | 0.2644   | 0.76941 | 0.25929 | 0.20231  | 0.10679  | 0.50043 | 1.4362  | 1.2001  | 0.3394  | 0.31008 | 1.825   | 0.54408   | 0.0059092 | 0.59054 |
| 6 | 137932666 | rs77061928       | 5 | 0.6555  | 1.1922 | 0.6014 | 0.62596 | 1.4429  | 0.47369  | 0.57217 | 0.67116 | 0.68144  | 0.43967  | 0.77231 | 0.2061  | 0.20392  | 0.10659  | 0.56454 | 1.8575  | 1.4725  | 0.19398 | 0.33716 | 2.1051  | 0.56765   | 0.0029378 | 0.61669 |
| 6 | 137932689 | chr6:137932689:I | 5 | 0.07152 | 0.936  | 0.4258 | 0.72234 | 0.16374 | 0.070036 | 0.96187 | 0.96243 | 0.073593 | 0.56716  | 0.91112 | 0.99217 | 0.10712  | 0.97327  | 0.9722  | 1.1274  | 0.20186 | 0.18727 | 0.4828  | 0.9244  | 0.049428  | 0.24653   | 0.97623 |
| 6 | 137932692 | chr6:137932692:I | 5 | 0.8409  | 0.9866 | 0.2151 | 0.70851 | 0.21563 | 0.078827 | 0.75244 | 1.1279  | 0.097103 | 0.084616 | 0.71691 | 1.0629  | 0.14488  | 0.58797  | 0.7746  | 1.1056  | 0.26182 | 0.32614 | 0.39669 | 0.92127 | 0.064688  | 0.21887   | 0.76914 |
| 6 | 137932694 | chr6:137932694:I | 5 | 0.8601  | 0.9883 | 0.2215 | 0.71255 | 0.21672 | 0.084933 | 0.74971 | 1.1306  | 0.097401 | 0.078838 | 0.71359 | 1.0659  | 0.14537  | 0.5782   | 0.77219 | 1.1018  | 0.26328 | 0.34467 | 0.3971  | 0.92227 | 0.064966  | 0.22206   | 0.76609 |
| 6 | 137933080 | rs138870431      | 4 | 0.8712  | 1.0419 | 0.9861 | 0.992   | 1.0624  | 0.82302  | 0.44792 | 0.91191 | 0.46105  | 0.07887  | 0.47077 | 1.1959  | 0.69885  | 0.58538  | 0.4202  | --      | --      | --      | --      | 1.0941  | 0.35444   | 0.22715   | 0.46643 |
| 6 | 137933159 | rs78761790       | 3 | 0.9094  | 0.9375 | 0.9095 | 0.9941  | 1.0739  | 0.84361  | 0.5171  | 1.0181  | 0.71198  | 0.94383  | 0.58458 | 0.41645 | 1.9487   | 0.17337  | 0.39183 | --      | --      | --      | --      | --      | --        | --        | --      |
| 6 | 137933180 | rs111753957      | 3 | 0.2714  | 2.1899 | 0.428  | --      | --      | --       | --      | 2.3038  | 1.0765   | 0.33695  | 0.72307 | 10.336  | 1.549    | 0.3036   | 0.75346 | --      | --      | --      | --      | 0.80441 | 1.2043    | 0.78045   | 0.59836 |
| 6 | 137933240 | rs190436922      | 3 | 0.7517  | 1.2152 | 0.9024 | 0.83721 | 1.0586  | 0.60767  | 0.53948 | 1.3271  | 1.0766   | 0.46565  | 0.36679 | --      | --       | --       | --      | --      | --      | --      | --      | 1.6265  | 1.0661    | 0.13992   | 0.3045  |
| 6 | 137933310 | rs7770198        | 5 | 0.797   | 1.0093 | 0.9673 | 1.0655  | 1.16856 | 0.65589  | 0.93543 | 1.0173  | 0.072815 | 0.74255  | 0.91481 | 1.0039  | 0.10353  | 0.89549  | 0.9859  | 1.1403  | 0.2025  | 0.20525 | 0.48267 | 0.99567 | 0.048089  | 0.40796   | 0.95753 |
| 6 | 137933374 | rs608242         | 5 | 0.03069 | 0.9181 | 0.7661 | 1.0319  | 0.17998 | 0.76188  | 0.89859 | 0.93422 | 0.075424 | 0.35976  | 1       | 0.79967 | 0.1198   | 0.059038 | 0.97966 | 0.9075  | 0.23936 | 0.43406 | 0.54917 | 0.92649 | 0.053804  | 0.1444    | 0.97457 |
| 6 | 137933495 | rs608702         | 5 | 0.5901  | 0.9779 | 0.1883 | 1.1758  | 0.13254 | 0.18552  | 0.90525 | 0.97815 | 0.055604 | 0.65099  | 0.9734  | 0.86711 | 0.087815 | 0.066829 | 1       | 0.80823 | 0.15839 | 0.01273 | 0.55947 | 1.0171  | 0.038164  | 0.58594   | 1       |
| 6 | 137933511 | rs73556137       | 5 | 0.7671  | 0.9881 | 0.8033 | 0.92491 | 1.08941 | 0.92582  | 0.92649 | 0.9777  | 0.079631 | 0.78674  | 0.95921 | 1.07114 | 0.11976  | 0.54836  | 0.98998 | 1.2247  | 0.2246  | 0.09257 | 0.52143 | 0.9696  | 0.054411  | 0.31561   | 0.97941 |
| 6 | 137933924 | rs610803         | 5 | 0.123   | 1.0597 | 0.387  | 1.3737  | 0.16093 | 0.099347 | 1       | 1.0283  | 0.072569 | 0.68426  | 0.91974 | 0.96834 | 0.10514  | 0.71215  | 1       | 0.92413 | 0.19573 | 0.38425 | 0.4897  | 1.0796  | 0.048585  | 0.28459   | 1       |
| 6 | 137934050 | rs642559         | 5 | 0.08128 | 1.0665 | 0.5488 | 1.3279  | 0.16747 | 1.13876  | 0.96433 | 1.0256  | 0.073878 | 0.72139  | 0.90165 | 0.9825  | 0.10706  | 0.81489  | 0.98063 | 0.9637  | 0.19651 | 0.67927 | 0.49273 | 1.091   | 0.049906  | 0.2348    | 0.96496 |
| 6 | 137934080 | rs9494833        | 5 | 0.945   | 0.9972 | 0.8623 | 0.95774 | 0.18862 | 0.99988  | 0.9209  | 0.98703 | 0.079936 | 0.88184  | 0.95546 | 1.0793  | 0.1205   | 0.41324  | 0.98297 | 1.1933  | 0.21815 | 0.14456 | 0.53435 | 0.97829 | 0.054384  | 0.39716   | 0.9714  |
| 6 | 137934153 | rs75033556       | 2 | 0.4861  | 0.9231 | 0.8184 | --      | --      | --       | --      | 0.45091 | 1.1329   | 0.28845  | 0.60388 | --      | --       | --       | --      | 0.71126 | 1.6302  | 0.62085 | 0.41548 | --      | --        | --        | --      |
| 6 | 137934372 | rs73556145       | 3 | 0.9323  | 0.9632 | 0.6301 | --      | --      | --       | --      | 1.3623  | 1.7932   | 0.57616  | 0.6517  | --      | --       | --       | --      | 1.8668  | 1.1469  | 0.28613 | 0.5513  | 0.6591  | 0.59992   | 0.45288   | 0.77878 |
| 6 | 137934410 | rs17066622       | 5 | 0.6519  | 1.0164 | 0.8764 | 1.0558  | 0.15466 | 0.8163   | 0.91139 | 0.9936  | 0.069026 | 0.92646  | 1       | 0.92963 | 0.11354  | 0.37301  | 0.96411 | 0.94754 | 0.21539 | 0.64852 | 0.50157 | 1.0447  |           |           |         |

|   |           |                  |   |         |          |        |         |         |          |         |         |          |         |         |          |          |          |         |         |         |         |         |         |          |          |         |
|---|-----------|------------------|---|---------|----------|--------|---------|---------|----------|---------|---------|----------|---------|---------|----------|----------|----------|---------|---------|---------|---------|---------|---------|----------|----------|---------|
| 6 | 137941518 | rs76757879       | 2 | 0.3439  | 0.4103   | 0.6139 | --      | --      | --       | 0.29022 | 1.1649  | 0.17943  | 0.68863 | --      | --       | --       | 0.78712  | 1.598   | 0.68971 | 0.37924 | --      | --      | --      |          |          |         |
| 6 | 137941656 | rs77404035       | 3 | 0.9002  | 1.0942   | 0.8918 | 2.1726  | 2.384   | 0.074583 | 0.34604 | 1.2374  | 0.91209  | 0.60731 | 0.32635 | --       | --       | 0.67927  | 1.3325  | 0.48243 | 0.38754 | --      | --      | --      |          |          |         |
| 6 | 137941813 | rs76227521       | 5 | 0.07869 | 1.1251   | 0.1145 | 0.85609 | 0.17765 | 0.42049  | 0.98776 | 1.1193  | 0.079342 | 0.14931 | 0.96867 | 1.4373   | 0.1281   | 0.006057 | 0.9943  | 1.3039  | 0.22703 | 0.0646  | 0.64    | 1.0577  | 0.05627  | 0.17904  | 0.98753 |
| 6 | 137941833 | rs75010796       | 2 | 0.1856  | 0.2841   | 0.5213 | --      | --      | --       | --      | 0.18306 | 1.1719   | 0.12578 | 0.75672 | --       | --       | 0.66185  | 1.6253  | 0.59939 | 0.46577 | --      | --      | --      | --       | --       | --      |
| 6 | 137941842 | rs182111439      | 2 | 0.5716  | 0.6228   | 0.8737 | --      | --      | --       | --      | 0.74042 | 1.3727   | 0.74346 | 0.60542 | 0.56223  | 1.0559   | 0.61046  | 0.78027 | --      | --      | --      | --      | --      | --       | --       | --      |
| 6 | 137942154 | rs9494837        | 5 | 0.8705  | 0.994    | 0.9265 | 0.95385 | 0.15687 | 0.62477  | 0.98084 | 0.98537 | 0.072108 | 0.86765 | 0.9925  | 0.93352  | 0.11814  | 0.42772  | 0.99265 | 0.88932 | 0.21556 | 0.36931 | 0.57186 | 1.0189  | 0.049094 | 0.31217  | 0.98963 |
| 6 | 137942647 | rs9484072        | 4 | 0.9487  | 1.0316   | 0.9539 | 1.4404  | 1.4464  | 0.64092  | 0.46589 | 1.0632  | 0.62339  | 0.87532 | 0.66123 | --       | --       | --       | --      | 1.3284  | 1.3016  | 0.6092  | 0.40171 | 0.55636 | 1.2641   | 0.097282 | 0.32102 |
| 6 | 137942909 | rs80230195       | 2 | 0.3998  | 0.3415   | 0.4402 | 0.12507 | 1.8226  | 0.47948  | 0.84625 | --      | --       | --      | --      | --       | --       | --       | --      | 0.89681 | 1.7869  | 0.9335  | 0.51495 | --      | --       | --       | --      |
| 6 | 137942969 | rs111552040      | 4 | 0.3851  | 0.8284   | 0.9838 | 0.9678  | 0.92358 | 0.93363  | 0.4843  | 0.77595 | 0.53661  | 0.14191 | 0.32276 | 0.66772  | 0.68473  | 0.12158  | 0.53747 | --      | --      | --      | --      | 0.85768 | 0.26264  | 0.5139   | 0.56466 |
| 6 | 137942983 | rs631391         | 5 | 0.1328  | 1.0473   | 0.8631 | 1.0091  | 0.1356  | 0.8036   | 0.98877 | 1.0299  | 0.060541 | 0.63073 | 0.99703 | 1.095    | 0.095952 | 0.282    | 0.99659 | 0.91104 | 0.15388 | 0.32466 | 0.60263 | 1.0613  | 0.04159  | 0.27904  | 0.99079 |
| 6 | 137942992 | rs9484073        | 2 | 0.1726  | 29.881   | 0.0562 | 454.85  | 2.1312  | 0.20222  | 0.92135 | --      | --       | --      | --      | --       | 3.061    | 1.5232   | 0.24209 | 0.51386 | --      | --      | --      | --      | --       | --       | --      |
| 6 | 137943206 | rs144932914      | 3 | 0.2191  | 0.5037   | 0.9207 | --      | --      | --       | --      | 0.58537 | 1.912    | 0.55309 | 0.44988 | 0.44347  | 0.64928  | 0.10107  | 0.84923 | --      | --      | --      | 0.79884 | 1.3285  | 0.99262  | 0.3213   |         |
| 6 | 137943274 | rs115769459      | 2 | 0.4037  | 0.3442   | 0.4416 | 0.12649 | 1.8231  | 0.48011  | 0.84587 | --      | --       | --      | --      | --       | --       | --       | --      | 0.90328 | 1.7896  | 0.94199 | 0.52802 | --      | --       | --       | --      |
| 6 | 137943451 | rs73556162       | 3 | 0.9292  | 1.0403   | 0.6156 | --      | --      | --       | --      | 1.7423  | 0.77694  | 0.29797 | 0.65669 | --       | --       | --       | --      | 1.4867  | 1.2096  | 0.57088 | 0.64728 | 0.69534 | 0.60561  | 0.47601  | 0.70506 |
| 6 | 137943728 | chr6:137943728:1 | 5 | 0.7708  | 0.9894   | 0.9324 | 0.92911 | 0.15711 | 0.49005  | 0.9649  | 0.98193 | 0.07209  | 0.8258  | 0.97207 | 0.94361  | 0.11819  | 0.47011  | 0.97128 | 0.88828 | 0.21533 | 0.32293 | 0.55747 | 1.0131  | 0.049093 | 0.41378  | 0.96266 |
| 6 | 137943852 | rs80227697       | 2 | 0.9782  | 0.9778   | 0.627  | --      | --      | --       | --      | --      | --       | --      | --      | --       | --       | --       | --      | 1.989   | 1.678   | 0.5317  | 0.67136 | 0.77988 | 0.94686  | 0.7319   | 0.84524 |
| 6 | 137944130 | rs189447279      | 2 | 0.4492  | 2.3921   | 0.5289 | --      | --      | --       | --      | 4.1167  | 1.4394   | 0.13931 | 0.57792 | --       | --       | --       | --      | --      | --      | --      | 0.90652 | 1.9244  | 0.80245  | 0.31656  |         |
| 6 | 137944292 | rs149066659      | 2 | 0.9785  | 0.978    | 0.6272 | --      | --      | --       | --      | --      | --       | --      | --      | --       | --       | --       | --      | 1.989   | 1.678   | 0.5317  | 0.67136 | 0.78025 | 0.94651  | 0.73197  | 0.84543 |
| 6 | 137944452 | rs59821680       | 2 | 0.3259  | 0.3961   | 0.5946 | --      | --      | --       | --      | 0.27461 | 1.1672   | 0.16917 | 0.69498 | --       | --       | --       | --      | 0.78712 | 1.598   | 0.68971 | 0.37924 | --      | --       | --       | --      |
| 6 | 137944679 | rs117181379      | 5 | 0.5189  | 0.9172   | 0.8652 | 1.2207  | 0.90092 | 0.32755  | 0.48799 | 0.82462 | 0.2756   | 1.8034  | 0.51974 | 1.0221   | 0.32626  | 0.66846  | 0.69267 | 0.50651 | 0.6582  | 0.06243 | 0.44994 | 0.96359 | 0.18419  | 0.57298  | 0.5734  |
| 6 | 137944758 | rs9494838        | 5 | 0.06448 | 1.1322   | 0.1118 | 0.87473 | 0.17641 | 0.44425  | 0.98843 | 1.1069  | 0.079331 | 0.19513 | 0.96719 | 1.4658   | 0.12742  | 0.00343  | 0.98978 | 1.2986  | 0.22738 | 0.06431 | 0.62841 | 1.0696  | 0.056158 | 0.11261  | 0.98439 |
| 6 | 137944988 | rs77080039       | 5 | 0.08728 | 1.1303   | 0.0803 | 0.85064 | 1.1774  | 0.39975  | 0.98766 | 1.1178  | 0.079626 | 0.15636 | 0.96807 | 1.474    | 0.12831  | 0.003497 | 0.99313 | 1.2979  | 0.2275  | 0.07008 | 0.63931 | 1.0581  | 0.056459 | 0.17481  | 0.98658 |
| 6 | 137945182 | rs9484074        | 2 | 0.2048  | 2.9751   | 0.6272 | 4.6721  | 1.2659  | 0.46772  | 0.88955 | --      | --       | --      | --      | --       | 2.0215   | 1.1714   | 0.32664 | 0.72309 | --      | --      | --      | --      | --       | --       | --      |
| 6 | 137945258 | rs113129839      | 3 | 0.8033  | 0.826    | 0.5796 | --      | --      | --       | --      | 1.3371  | 1.3708   | 0.59489 | 0.43667 | 0.089698 | 2.2913   | 0.08305  | 0.69892 | --      | --      | --      | --      | 0.97972 | 1.0121   | 0.83908  | 0.52374 |
| 6 | 137945503 | rs112696455      | 3 | 0.8724  | 0.8854   | 0.6348 | --      | --      | --       | --      | 1.3179  | 1.3777   | 0.60521 | 0.42161 | 0.12434  | 2.2102   | 0.11464  | 0.67704 | --      | --      | --      | --      | 1.0715  | 0.99627  | 0.88738  | 0.55023 |
| 6 | 137945548 | rs773749         | 5 | 0.5563  | 0.9809   | 0.4146 | 1.167   | 0.1444  | 0.18861  | 0.99594 | 0.97441 | 0.063861 | 0.63992 | 0.97969 | 0.89709  | 0.10962  | 0.29333  | 0.98989 | 0.80379 | 0.15476 | 0.04661 | 0.70646 | 0.99839 | 0.044623 | 0.32059  | 0.99403 |
| 6 | 137945598 | rs79731087       | 5 | 0.0827  | 1.128    | 0.0955 | 0.8531  | 0.17728 | 0.40671  | 0.98884 | 1.1195  | 0.079455 | 0.15074 | 0.96874 | 1.4561   | 0.12809  | 0.004612 | 0.99436 | 1.2992  | 0.22729 | 0.06883 | 0.64004 | 1.0581  | 0.056439 | 0.17409  | 0.98657 |
| 6 | 137945865 | rs536324         | 5 | 0.5605  | 0.9807   | 0.3975 | 1.1674  | 0.14459 | 0.18572  | 0.99354 | 0.97372 | 0.063841 | 0.63227 | 0.97672 | 0.89289  | 0.10971  | 0.26859  | 0.98225 | 0.80266 | 0.15493 | 0.04473 | 0.70243 | 1.0001  | 0.044294 | 0.3436   | 0.9897  |
| 6 | 137945924 | rs6570180        | 5 | 0.7393  | 1.0101   | 0.9353 | 0.94229 | 0.12994 | 0.66418  | 1       | 0.98732 | 0.058863 | 0.86772 | 1       | 0.98473  | 0.094125 | 0.87307  | 1       | 1.0035  | 0.16273 | 0.96199 | 0.61249 | 1.0333  | 0.040602 | 0.29243  | 1       |
| 6 | 137945963 | rs75305766       | 3 | 0.1183  | 0.5605   | 0.9937 | --      | --      | --       | --      | 0.58072 | 0.50728  | 0.15322 | 0.71389 | 0.56204  | 1.0773   | 0.27932  | 0.67554 | --      | --      | --      | --      | 0.53039 | 0.6285   | 0.097772 | 0.55794 |
| 6 | 137946127 | rs6570181        | 5 | 0.8608  | 0.9936   | 0.916  | 0.95885 | 0.15762 | 0.67033  | 0.98474 | 0.98137 | 0.072063 | 0.82683 | 0.99515 | 0.93462  | 0.11791  | 0.43495  | 0.9949  | 0.87776 | 0.21709 | 0.32124 | 0.57001 | 1.0199  | 0.049109 | 0.3228   | 0.99307 |
| 6 | 137946258 | chr6:137946258:D | 4 | 0.6554  | 0.8825   | 0.895  | 1.1619  | 1.4466  | 0.89059  | 0.36262 | 1.0732  | 0.59453  | 0.80558 | 0.49492 | 0.51269  | 0.80072  | 0.15418  | 0.66846 | --      | --      | --      | --      | 0.90951 | 0.35627  | 0.605    | 0.53555 |
| 6 | 137946956 | rs77100867       | 2 | 0.1911  | 0.2883   | 0.5267 | --      | --      | --       | --      | 0.18659 | 1.1736   | 0.11819 | 0.73596 | --       | --       | --       | --      | 0.66378 | 1.6252  | 0.60021 | 0.46376 | --      | --       | --       | --      |
| 6 | 137947089 | rs115582019      | 3 | 0.7153  | 1.1479   | 0.9535 | 1.6057  | 1.3986  | 0.53459  | 0.49782 | --      | --       | --      | --      | 1.2216   | 0.62615  | 0.51694  | 0.67592 | --      | --      | --      | --      | 1.0554  | 0.5045   | 0.82682  | 0.40185 |
| 6 | 137947208 | rs620607         | 5 | 0.5981  | 0.9829   | 0.4301 | 1.152   | 0.14409 | 0.22791  | 1       | 0.97649 | 0.063908 | 0.66551 | 0.97943 | 0.89639  | 0.10963  | 0.28957  | 0.99    | 0.80333 | 0.15476 | 0.0462  | 0.7066  | 1.0023  | 0.044189 | 0.36954  | 1       |
| 6 | 137947335 | rs114805848      | 2 | 0.2062  | 4.6613   | 0.5735 | 11.359  | 1.9969  | 0.25744  | 0.72678 | --      | --       | --      | 2.7506  | 1.5367   | 0.24885  | 0.49398  | --      | --      | --      | --      | --      | --      | --       | --       | --      |
| 6 | 137947570 | rs12213095       | 5 | 0.07255 | 1.1297   | 0.1061 | 0.84752 | 0.17706 | 0.39097  | 0.99075 | 1.1096  | 0.079281 | 0.18425 | 0.96813 | 1.4547   | 0.12807  | 0.004654 | 0.99349 | 1.304   | 0.22683 | 0.06499 | 0.63957 | 1.074   | 0.056173 | 0.10126  | 0.98669 |
| 6 | 137947705 | rs9484075        | 2 | 0.1943  | 0.919102 | 0.019  | 916.44  | 2.1356  | 0.19729  | 0.91834 | --      | --       | --      | 3.0429  | 1.168    | 0.21311  | 0.7456   | --      | --      | --      | --      | --      | --      | --       | --       | --      |
| 6 | 137947897 | rs486491         | 5 | 0.5868  | 0.982    | 0.399  | 1.1522  | 0.14409 | 0.22698  | 0.99832 | 0.97634 | 0.063921 | 0.66299 | 0.97733 | 0.98664  | 0.10972  | 0.28491  | 0.98818 | 0.79269 | 0.15508 | 0.03302 | 0.70341 | 1.0026  | 0.044279 | 0.35803  | 0.99486 |
| 6 | 137947899 | rs145703505      | 2 | 0.9848  | 0.9844   | 0.6302 | --      | --      | --       | --      | --      | --       | --      | --      | --       | --       | --       | --      | 1.989   | 1.678   | 0.5317  | 0.67136 | 0.78628 | 0.94855  | 0.7217   | 0.85043 |
| 6 | 137947986 | rs142963457      | 5 | 0.8999  | 0.9634   | 0.9129 | 1.3556  | 1.1942  | 0.70716  | 0.73837 | 0.807   | 0.66935  | 0.47863 | 0.4474  | 0.53981  | 0.81052  | 0.26851  | 0.65036 | 1.5473  | 0.89146 | 0.30515 | 0.46917 | 1.0416  | 0.42067  | 0.98163  | 0.57589 |
| 6 | 137947988 | rs487438         | 5 | 0.09049 | 1.0534   | 0.8899 | 0.99947 | 0.1361  | 0.84558  | 0.98639 | 1.0279  | 0.060549 | 0.65395 | 0.99528 | 1.0925   | 0.095979 | 0.29268  | 0.99488 | 0.94884 | 0.14968 | 0.5836  | 0.6122  | 1.0723  | 0.041614 | 0.18172  | 0.99122 |
| 6 | 137948085 | rs186398659      | 3 | 0.7115  | 1.1502   | 0.9527 | 1.6181  | 1.4029  | 0.52755  | 0.50015 | --      | --       | --      | 1.2237  | 0.62625  | 0.5155   | 0.67699  | --      | --      | --      | --      | --      | 1.0572  | 0.50421  | 0.82175  | 0.40363 |
| 6 | 137948417 | rs62432703       | 5 | 0.6185  | 0.9695   | 0.9001 | 0.96398 | 0.26934 | 0.62237  | 0.66081 | 1.088   | 0.1287   | 0.34479 | 0.68618 | 0.93669  | 0.19256  | 0.51303  | 0.72953 | 0.95122 | 0.30742 | 0.81076 | 0.61347 | 0.93246 | 0.082355 | 0.84639  | 0.7166  |
| 6 | 137948434 | rs636107         | 5 | 0.5708  | 0.9814   | 0.401  | 1.152   | 0.14409 | 0.22791  | 1       | 0.97643 | 0.063925 | 0.66431 | 0.97734 | 0.89598  | 0.10974  | 0.28144  | 0.9882  | 0.79242 | 0.15511 | 0.03277 | 0.70254 | 1.0012  | 0.044239 | 0.33727  | 1       |
| 6 | 137948499 | rs141331623      | 5 | 0.7913  | 0.9531   | 0.8251 |         |         |          |         |         |          |         |         |          |          |          |         |         |         |         |         |         |          |          |         |

|   |           |                  |   |         |        |        |         |         |          |         |         |          |         |         |          |          |          |         |         |         |         |         |         |          |          |         |
|---|-----------|------------------|---|---------|--------|--------|---------|---------|----------|---------|---------|----------|---------|---------|----------|----------|----------|---------|---------|---------|---------|---------|---------|----------|----------|---------|
| 6 | 137952181 | rs79361822       | 3 | 0.9638  | 1.0203 | 0.6545 | --      | --      | --       | --      | 1.4968  | 0.74745  | 0.51749 | 0.79042 | --       | --       | --       | --      | 1.7552  | 1.2514  | 0.33035 | 0.51801 | 0.69468 | 0.61017  | 0.51074  | 0.77882 |
| 6 | 137952213 | rs180681621      | 4 | 0.2903  | 0.6145 | 0.2418 | 0.03515 | 1.5152  | 0.27347  | 0.69328 | 0.85038 | 0.98876  | 0.69243 | 0.393   | 1.0601   | 0.77383  | 0.94355  | 0.8117  | --      | --      | --      | --      | 0.67466 | 0.41829  | 0.22663  | 0.76171 |
| 6 | 137952282 | rs143843443      | 2 | 0.2383  | 0.5029 | 0.6916 | --      | --      | --       | --      | --      | --       | --      | 0.44957 | 0.64778  | 0.12256  | 0.89143  | --      | --      | --      | --      | 0.8105  | 1.3373  | 0.92669  | 0.40523  |         |
| 6 | 137952309 | rs77292769       | 3 | 0.5332  | 0.59   | 0.7536 | --      | --      | --       | --      | 0.85979 | 1.6101   | 0.80295 | 0.40122 | --       | --       | --       | --      | 0.27048 | 1.3476  | 0.23054 | 0.66919 | 1.0966  | 1.4767   | 0.8216   | 0.39941 |
| 6 | 137952543 | rs146842987      | 3 | 0.9064  | 0.9498 | 0.9248 | --      | --      | --       | --      | 1.1263  | 0.63136  | 0.7505  | 0.56644 | 0.67443  | 1.5771   | 0.42453  | 0.39053 | --      | --      | --      | --      | 0.83757 | 0.65874  | 0.58225  | 0.34828 |
| 6 | 137952677 | rs74926629       | 3 | 0.9589  | 0.9771 | 0.5605 | --      | --      | --       | --      | 1.7136  | 0.81111  | 0.45292 | 0.8342  | --       | --       | --       | --      | 1.6039  | 1.2191  | 0.55292 | 0.73482 | 0.63438 | 0.60314  | 0.47865  | 0.86573 |
| 6 | 137952686 | chr6:137952686:D | 5 | 0.0824  | 1.1242 | 0.1196 | 0.8453  | 0.17676 | 0.3857   | 0.99342 | 1.1125  | 0.079394 | 0.17397 | 0.96932 | 1.4549   | 0.12801  | 0.004734 | 0.9945  | 1.2184  | 0.23282 | 0.16925 | 0.62206 | 1.0752  | 0.056022 | 0.096547 | 0.99262 |
| 6 | 137952694 | rs17066649       | 5 | 0.80661 | 1.1287 | 0.0958 | 0.85234 | 0.17705 | 0.4079   | 0.99278 | 1.1174  | 0.079384 | 0.15908 | 0.97131 | 1.4554   | 0.12803  | 0.004697 | 0.99386 | 1.3094  | 0.22724 | 0.05985 | 0.63797 | 1.0606  | 0.056282 | 0.16178  | 0.99059 |
| 6 | 137952709 | rs140304875      | 3 | 0.7148  | 0.8111 | 0.9925 | 1.0336  | 2.7947  | 0.69563  | 0.3568  | --      | --       | --      | --      | 0.94968  | 2.0611   | 0.86265  | 0.47658 | --      | --      | --      | --      | 0.79071 | 0.61066  | 0.36825  | 0.45276 |
| 6 | 137952912 | rs12197157       | 5 | 0.08278 | 1.1276 | 0.0963 | 0.85175 | 0.17709 | 0.40808  | 0.9927  | 1.1153  | 0.079391 | 0.16617 | 0.97068 | 1.4564   | 0.12804  | 0.004635 | 0.99393 | 1.3015  | 0.22706 | 0.06799 | 0.64216 | 1.0606  | 0.056282 | 0.16228  | 0.99112 |
| 6 | 137953165 | rs12210705       | 5 | 0.07399 | 1.1294 | 0.1041 | 0.84616 | 0.17693 | 0.39266  | 0.99217 | 1.1065  | 0.079244 | 0.19796 | 0.97059 | 1.457    | 0.12804  | 0.004583 | 0.99351 | 1.3022  | 0.22686 | 0.06704 | 0.64116 | 1.0756  | 0.056056 | 0.095429 | 0.99107 |
| 6 | 137953286 | rs79143738       | 3 | 0.8891  | 0.9194 | 0.5415 | --      | --      | --       | --      | 1.2636  | 0.9366   | 0.51303 | 0.38116 | 0.10915  | 0.20367  | 0.024119 | 0.60911 | --      | --      | --      | --      | 1.0262  | 0.85213  | 0.89394  | 0.40261 |
| 6 | 137953385 | rs671890         | 5 | 0.4673  | 0.9729 | 0.2458 | 1.1098  | 0.12443 | 0.39041  | 0.99348 | 0.97747 | 0.055931 | 0.66253 | 0.98495 | 0.87953  | 0.088994 | 0.1184   | 0.99495 | 0.7843  | 0.14431 | 0.01084 | 0.65222 | 1.0097  | 0.038224 | 0.91006  | 0.99236 |
| 6 | 137953547 | rs72981346       | 5 | 0.5445  | 1.025  | 0.9681 | 0.9372  | 0.18776 | 0.88331  | 0.95856 | 0.99633 | 0.80301  | 0.98075 | 0.98115 | 1.0586   | 0.12011  | 0.49426  | 0.98845 | 1.0982  | 0.22157 | 0.49602 | 0.58864 | 1.0352  | 0.054963 | 0.74322  | 0.98267 |
| 6 | 137953576 | rs75639210       | 2 | 0.8896  | 1.1309 | 0.4322 | --      | --      | --       | --      | 1.5613  | 0.97687  | 0.16718 | 0.33482 | 0.25221  | 2.1059   | 0.01361  | 0.40962 | --      | --      | --      | --      | --      | --       | --       | --      |
| 6 | 137953682 | rs632535         | 5 | 0.4647  | 0.9733 | 0.2582 | 1.1095  | 0.12446 | 0.39269  | 0.99369 | 0.97412 | 0.055907 | 0.61734 | 0.98721 | 0.88614  | 0.089928 | 0.14131  | 0.99526 | 0.78174 | 0.1444  | 0.00987 | 0.65261 | 1.0093  | 0.038219 | 0.90237  | 0.99407 |
| 6 | 137953695 | rs79661432       | 3 | 0.4456  | 0.8481 | 0.9886 | 0.88397 | 0.77635 | 0.75952  | 0.47196 | --      | --       | --      | --      | 0.77632  | 0.64406  | 0.32243  | 0.47854 | --      | --      | --      | --      | 0.85522 | 0.23989  | 0.74548  | 0.54725 |
| 6 | 137953734 | rs632167         | 5 | 0.2531  | 0.3    | 0.8553 | 1.0225  | 0.17263 | 0.79425  | 0.99284 | 1.0279  | 0.055603 | 0.64013 | 0.9867  | 1.0464   | 0.909862 | 0.65794  | 0.99406 | 0.88065 | 0.14547 | 0.16183 | 0.62749 | 1.0454  | 0.038172 | 0.30419  | 0.99149 |
| 6 | 137953783 | rs9484076        | 2 | 0.8564  | 1.1265 | 0.8011 | --      | --      | --       | --      | 1.0532  | 0.70993  | 0.90457 | 0.62644 | --       | --       | --       | --      | 1.6946  | 1.7495  | 0.47799 | 0.42584 | --      | --       | --       | --      |
| 6 | 137954118 | rs142880029      | 5 | 0.9249  | 0.9737 | 0.8167 | 0.75805 | 1.3944  | 0.34045  | 0.36651 | 1.4973  | 0.62151  | 0.12231 | 0.42018 | 0.67782  | 1.1749   | 0.18118  | 0.33331 | 0.34802 | 1.0588  | 0.13505 | 0.56049 | 0.99836 | 0.35773  | 0.88044  | 0.45229 |
| 6 | 137954339 | rs12199435       | 5 | 0.09765 | 1.1249 | 0.0851 | 0.84982 | 0.17691 | 0.40449  | 0.99334 | 1.114   | 0.079933 | 0.1677  | 0.95776 | 1.4835   | 0.12811  | 0.003062 | 0.9935  | 1.2144  | 0.23286 | 0.17898 | 0.62579 | 1.0611  | 0.056265 | 0.1633   | 0.99288 |
| 6 | 137954342 | rs188952353      | 5 | 0.1947  | 1.3951 | 0.6586 | 1.646   | 1.6533  | 0.61467  | 0.58555 | 0.71826 | 0.50268  | 0.46776 | 0.88239 | 1.5955   | 1.1338   | 0.67805  | 0.77027 | 2.3358  | 1.2292  | 0.4488  | 0.92547 | 1.7478  | 0.32599  | 0.081629 | 0.87005 |
| 6 | 137954355 | rs138090376      | 4 | 0.8034  | 1.0681 | 0.9998 | 1.1205  | 0.91889 | 0.60918  | 0.58934 | 1.0985  | 0.51269  | 0.65919 | 0.4021  | 1.0556   | 0.65191  | 0.89009  | 0.50566 | --      | --      | --      | --      | 1.0474  | 0.37974  | 0.44256  | 0.384   |
| 6 | 137954529 | rs143132856      | 2 | 0.9914  | 0.9911 | 0.6329 | --      | --      | --       | --      | --      | --       | --      | --      | --       | --       | --       | --      | 1.989   | 1.678   | 0.5317  | 0.67136 | 0.79089 | 0.95502  | 0.70899  | 0.86916 |
| 6 | 137954646 | rs191983010      | 3 | 0.2216  | 0.2233 | 0.2029 | 0.024   | 1.6388  | 0.37331  | 0.90867 | 1.0722  | 1.3751   | 0.90968 | 0.49656 | --       | --       | --       | --      | --      | --      | --      | --      | 0.35129 | 2.1534   | 0.43674  | 0.38956 |
| 6 | 137954831 | chr6:137954831:D | 2 | 0.3356  | 0.4016 | 0.6035 | --      | --      | --       | --      | 0.27948 | 1.1769   | 0.17223 | 0.68762 | --       | --       | --       | --      | 0.78289 | 1.5966  | 0.6838  | 0.37911 | --      | --       | --       | --      |
| 6 | 137954832 | chr6:137954832:D | 2 | 0.35    | 0.4128 | 0.6185 | --      | --      | --       | --      | 0.29152 | 1.1765   | 0.16509 | 0.65961 | --       | --       | --       | --      | 0.78196 | 1.5941  | 0.67761 | 0.3722  | --      | --       | --       | --      |
| 6 | 137954963 | rs12201110       | 5 | 0.08326 | 1.1334 | 0.0747 | 0.85202 | 0.17698 | 0.41591  | 0.99304 | 1.1147  | 0.079739 | 0.1669  | 0.96343 | 1.4859   | 0.12807  | 0.002956 | 0.99425 | 1.2988  | 0.22527 | 0.07168 | 0.64927 | 1.0627  | 0.056296 | 0.1571   | 0.99288 |
| 6 | 137954972 | rs118089736      | 5 | 0.1875  | 1.189  | 0.759  | 1.7486  | 0.59493 | 0.18131  | 0.85017 | 1.2519  | 0.25578  | 0.32633 | 0.86409 | 1.1024   | 0.31938  | 0.6752   | 0.93335 | 0.48198 | 0.77658 | 0.07188 | 0.41795 | 1.2043  | 0.18775  | 0.12859  | 0.8797  |
| 6 | 137955030 | rs11171160       | 3 | 0.8186  | 0.8462 | 0.4108 | --      | --      | --       | --      | 1.3177  | 1.1611   | 0.53629 | 0.40317 | 0.071381 | 1.9943   | 0.036104 | 0.69638 | --      | --      | --      | --      | 1.1755  | 1.0589   | 0.69196  | 0.44351 |
| 6 | 137955032 | rs6941060        | 5 | 0.7952  | 0.9905 | 0.9341 | 0.95431 | 0.15624 | 0.66541  | 1       | 0.98458 | 0.073049 | 0.86231 | 0.97018 | 0.92915  | 0.11673  | 0.42682  | 1       | 0.8931  | 0.21013 | 0.41357 | 0.62245 | 1.0139  | 0.049107 | 0.34662  | 1       |
| 6 | 137955334 | rs150612796      | 2 | 0.9857  | 1.0149 | 0.6413 | --      | --      | --       | --      | --      | --       | --      | --      | --       | --       | --       | --      | 2.0072  | 1.6819  | 0.51435 | 0.65522 | 0.81567 | 0.95214  | 0.69443  | 0.74242 |
| 6 | 137955370 | rs187227983      | 3 | 0.4647  | 0.7004 | 0.9208 | --      | --      | --       | --      | --      | --       | --      | --      | 1.0291   | 1.2186   | 0.9083   | 0.48794 | 0.78216 | 1.0045  | 0.6991  | 0.69093 | 0.60623 | 0.62602  | 0.20545  | 0.36414 |
| 6 | 137955545 | rs12201389       | 5 | 0.09438 | 1.1275 | 0.0806 | 0.85017 | 0.17696 | 0.41026  | 0.99377 | 1.1124  | 0.080263 | 0.17204 | 0.95093 | 1.4908   | 0.12814  | 0.002753 | 0.99368 | 1.2244  | 0.23018 | 0.16744 | 0.63845 | 1.0637  | 0.056396 | 0.15104  | 0.9927  |
| 6 | 137955463 | rs35741167       | 5 | 0.4218  | 1.0332 | 0.9549 | 0.94604 | 0.18749 | 0.89202  | 0.94645 | 0.99704 | 0.080649 | 0.98253 | 0.96309 | 1.0454   | 0.11995  | 0.56389  | 0.98217 | 1.1278  | 0.22032 | 0.37852 | 0.58623 | 1.05    | 0.054829 | 0.53079  | 0.97437 |
| 6 | 137955515 | rs12201430       | 5 | 0.09212 | 1.1283 | 0.0811 | 0.85125 | 0.1769  | 0.4135   | 0.99408 | 1.1143  | 0.080265 | 0.16524 | 0.95008 | 1.491    | 0.12813  | 0.002743 | 0.9937  | 1.2246  | 0.23018 | 0.16719 | 0.63845 | 1.0639  | 0.056377 | 0.14958  | 0.99305 |
| 6 | 137955572 | rs12192746       | 5 | 0.09348 | 1.1277 | 0.0809 | 0.85103 | 0.17682 | 0.41302  | 0.99461 | 1.1143  | 0.080215 | 0.16501 | 0.94981 | 1.4902   | 0.12807  | 0.00278  | 0.99437 | 1.2231  | 0.23038 | 0.16503 | 0.63404 | 1.0631  | 0.056259 | 0.15546  | 0.99471 |
| 6 | 137955636 | rs153453         | 5 | 0.5469  | 0.9799 | 0.326  | 1.11    | 0.12515 | 0.39097  | 0.97494 | 0.97811 | 0.056801 | 0.67005 | 0.95564 | 0.88645  | 0.090819 | 0.13874  | 0.97964 | 0.80252 | 0.14683 | 0.01755 | 0.63707 | 1.01    | 0.038629 | 0.91933  | 0.97246 |
| 6 | 137955651 | chr6:137955651:D | 5 | 0.0943  | 1.1274 | 0.0807 | 0.851   | 0.17682 | 0.41297  | 0.99456 | 1.1142  | 0.080206 | 0.16473 | 0.9496  | 1.4896   | 0.12806  | 0.002807 | 0.9944  | 1.2234  | 0.23036 | 0.16438 | 0.63382 | 1.0624  | 0.056247 | 0.15839  | 0.99456 |
| 6 | 137955789 | rs511800         | 5 | 0.08266 | 1.0551 | 0.9052 | 1       | 0.13733 | 0.84711  | 0.97244 | 1.0348  | 0.061145 | 0.57117 | 0.97606 | 1.0914   | 0.096529 | 0.29181  | 0.98419 | 0.94938 | 1.4846  | 0.59051 | 0.61801 | 1.0722  | 0.041768 | 0.18464  | 0.98068 |
| 6 | 137955930 | rs76703666       | 3 | 0.9387  | 0.9661 | 0.5895 | --      | --      | --       | --      | 1.6278  | 0.80911  | 0.48503 | 0.8126  | --       | --       | --       | --      | 1.6023  | 1.2191  | 0.55299 | 0.73348 | 0.6397  | 0.60204  | 0.48765  | 0.84112 |
| 6 | 137956333 | rs9688558        | 5 | 0.08887 | 1.1349 | 0.0617 | 0.84573 | 0.17645 | 0.39181  | 1       | 1.1113  | 0.079887 | 0.17836 | 0.958   | 1.4998   | 0.1278   | 0.002473 | 1       | 1.3016  | 0.22513 | 0.07044 | 0.65189 | 1.0645  | 0.056128 | 0.1537   | 1       |
| 6 | 137956470 | rs9688555        | 5 | 0.08768 | 1.1347 | 0.0648 | 0.84792 | 0.17728 | 0.40055  | 0.99312 | 1.1114  | 0.079928 | 0.17763 | 0.95718 | 1.4973   | 0.1282   | 0.002492 | 0.99529 | 1.3045  | 0.22499 | 0.071   | 0.65713 | 1.0633  | 0.056313 | 0.15933  | 0.99377 |
| 6 | 137956512 | rs185339254      | 4 | 0.2708  | 1.4622 | 0.7258 | 3.8941  | 1.7276  | 0.080057 | 0.70578 | 1.2383  | 0.74996  | 0.63536 |         |          |          |          |         |         |         |         |         |         |          |          |         |

|   |           |                  |   |          |         |        |         |         |          |         |         |          |           |         |          |          |          |         |         |         |         |         |         |          |          |         |
|---|-----------|------------------|---|----------|---------|--------|---------|---------|----------|---------|---------|----------|-----------|---------|----------|----------|----------|---------|---------|---------|---------|---------|---------|----------|----------|---------|
| 6 | 137960986 | rs17066658       | 5 | 0.8904   | 1.0228  | 0.1024 | 1.613   | 0.43197 | 0.19563  | 0.80176 | 1.4013  | 0.19883  | 0.042904  | 0.85667 | 0.5623   | 0.32498  | 0.030087 | 0.97444 | 1.0422  | 0.43088 | 0.89781 | 0.89626 | 0.91175 | 0.13438  | 0.46599  | 0.89386 |
| 6 | 137961013 | rs17066662       | 5 | 0.8003   | 1.0561  | 0.5154 | 0.98218 | 0.13835 | 0.80445  | 0.98426 | 1.0037  | 0.061227 | 0.95914   | 1       | 0.97051  | 0.10359  | 0.73843  | 0.99516 | 1.2115  | 0.13111 | 0.14455 | 0.976   | 1.0892  | 0.04234  | 0.62965  | 0.99473 |
| 6 | 137961334 | rs607447         | 5 | 0.9207   | 0.9928  | 0.0568 | 1.511   | 1.1833  | 0.009092 | 0.98862 | 1.0413  | 0.07983  | 0.6241    | 0.98241 | 0.89338  | 0.12551  | 0.11139  | 0.98984 | 0.74708 | 0.17077 | 0.08699 | 0.98268 | 0.97581 | 0.055455 | 0.32775  | 0.98933 |
| 6 | 137961353 | rs145035331      | 4 | 0.774    | 1.2199  | 0.964  | 1.8379  | 2.2029  | 0.50125  | 0.69051 | 0.69894 | 1.9165   | 0.52279   | 0.31292 | --       | --       | --       | --      | 0.81286 | 1.3783  | 0.8616  | 0.69737 | 1.5816  | 0.96138  | 0.193    | 0.50992 |
| 6 | 137961665 | rs138851166      | 4 | 0.7736   | 1.2203  | 0.9639 | 1.8379  | 2.2029  | 0.50125  | 0.69051 | 0.69894 | 1.9165   | 0.52279   | 0.31292 | --       | --       | --       | --      | 0.81286 | 1.3783  | 0.8616  | 0.69737 | 1.5824  | 0.96125  | 0.19239  | 0.50994 |
| 6 | 137961672 | rs600469         | 5 | 0.01598  | 1.0694  | 0.7206 | 1.1848  | 0.12866 | 0.20854  | 1       | 1.08    | 0.05517  | 0.16248   | 0.98589 | 1.0823   | 0.086306 | 0.40311  | 1       | 0.92897 | 0.11918 | 0.48054 | 1       | 1.0677  | 0.037932 | 0.96967  | 1       |
| 6 | 137961704 | rs533091         | 5 | 0.0153   | 1.0699  | 0.7243 | 1.1829  | 0.12881 | 0.20555  | 0.99683 | 1.0826  | 0.055272 | 0.15289   | 0.98231 | 1.0785   | 0.086243 | 0.42491  | 0.99855 | 0.92923 | 0.11917 | 0.48219 | 0.99599 | 1.0683  | 0.037924 | 0.68854  | 0.99746 |
| 6 | 137961760 | rs97373198       | 5 | 0.009333 | 0.9301  | 0.4914 | 0.88433 | 0.12871 | 0.42027  | 0.99403 | 0.90696 | 0.055279 | 0.081738  | 0.98391 | 0.90798  | 0.0856   | 0.3181   | 0.99786 | 1.1392  | 0.11764 | 0.24219 | 0.99146 | 0.93007 | 0.038009 | 0.54602  | 0.99535 |
| 6 | 137962011 | rs9484077        | 5 | 0.009454 | 0.9302  | 0.4689 | 0.88656 | 0.12874 | 0.43398  | 0.99417 | 0.90461 | 0.05543  | 0.072545  | 0.97925 | 0.90879  | 0.08561  | 0.32299  | 0.99752 | 1.144   | 0.11764 | 0.22749 | 0.99355 | 0.93049 | 0.038009 | 0.55192  | 0.99578 |
| 6 | 137962133 | rs1547296        | 5 | 0.2208   | 0.9368  | 0.1024 | 0.89878 | 0.15017 | 0.59959  | 0.97804 | 0.84759 | 0.064011 | 0.0083726 | 0.96694 | 0.95397  | 0.10244  | 0.67652  | 0.99329 | 1.2746  | 0.13395 | 0.06149 | 0.96077 | 0.91595 | 0.045133 | 0.24179  | 0.98902 |
| 6 | 137962376 | rs1547295        | 5 | 0.009584 | 0.9304  | 0.4877 | 0.8846  | 0.12871 | 0.42216  | 0.99392 | 0.90735 | 0.055283 | 0.083167  | 0.98401 | 0.90807  | 0.088598 | 0.31866  | 0.99792 | 1.1405  | 0.11764 | 0.23828 | 0.99178 | 0.93016 | 0.038011 | 0.54766  | 0.99531 |
| 6 | 137962655 | rs7769192        | 5 | 0.009473 | 0.9302  | 0.4689 | 0.88656 | 0.12874 | 0.43398  | 0.99417 | 0.90461 | 0.05543  | 0.072544  | 0.97926 | 0.90888  | 0.08561  | 0.3231   | 0.99746 | 1.144   | 0.11764 | 0.22751 | 0.99354 | 0.93052 | 0.038009 | 0.55257  | 0.9957  |
| 6 | 137962699 | rs74797068       | 2 | 0.5979   | 0.576   | 0.6816 | --      | --      | --       | --      | 0.75343 | 1.2338   | 0.81953   | 0.70376 | --       | --       | --       | --      | 0.2901  | 1.972   | 0.39163 | 0.61326 | --      | --       | --       | --      |
| 6 | 137962716 | chr6:137962716:1 | 4 | 0.7655   | 0.9522  | 0.8905 | 1.3656  | 0.76206 | 0.26457  | 0.48804 | 0.85175 | 0.3333   | 0.33595   | 0.49509 | 1.1886   | 0.43445  | 0.30109  | 0.53252 | --      | --      | --      | --      | 0.91723 | 0.21757  | 0.62896  | 0.48648 |
| 6 | 137962941 | rs117522724      | 2 | 0.7525   | 0.7299  | 0.8312 | --      | --      | --       | --      | 0.83761 | 1.1889   | 0.90662   | 0.67194 | --       | --       | --       | --      | 0.52525 | 1.8383  | 0.52947 | 0.52623 | --      | --       | --       | --      |
| 6 | 137962946 | rs584616         | 5 | 0.7326   | 1.0671  | 0.0442 | 3.5491  | 0.56047 | 0.042665 | 0.93418 | 0.80311 | 0.19485  | 0.23661   | 0.94296 | 0.72387  | 0.34252  | 0.41581  | 0.98137 | 1.8302  | 0.38652 | 0.11702 | 0.94525 | 0.93479 | 0.13451  | 0.49707  | 0.97004 |
| 6 | 137963038 | chr6:137963038:D | 5 | 0.4271   | 1.0475  | 0.0529 | 1.2887  | 0.14673 | 0.070973 | 0.99465 | 1.1069  | 0.064799 | 0.11405   | 0.98039 | 1.1178   | 0.095657 | 0.27318  | 0.99709 | 0.75754 | 0.13486 | 0.03259 | 0.99065 | 1.0178  | 0.044947 | 0.82002  | 0.99331 |
| 6 | 137963040 | rs7769441        | 5 | 0.58     | 0.9641  | 0.0135 | 0.83351 | 0.14443 | 0.2226   | 0.99138 | 0.88848 | 0.062904 | 0.05935   | 0.97781 | 0.87281  | 0.094391 | 0.18456  | 0.99564 | 1.418   | 0.12987 | 0.00666 | 0.98796 | 0.97401 | 0.043649 | 0.62603  | 0.9916  |
| 6 | 137963041 | rs57715651       | 5 | 0.4358   | 1.0469  | 0.0502 | 1.2891  | 0.14677 | 0.070435 | 0.99426 | 1.1065  | 0.064822 | 0.1152    | 0.98003 | 1.1179   | 0.095671 | 0.27305  | 0.99699 | 0.75431 | 0.13506 | 0.02997 | 0.98888 | 1.0179  | 0.044951 | 0.81842  | 0.99316 |
| 6 | 137963053 | rs12524433       | 5 | 0.09312  | 0.10536 | 0.5334 | 0.98651 | 0.13906 | 0.84634  | 0.98403 | 1.003   | 0.061064 | 0.96772   | 0.99551 | 0.96192  | 0.10309  | 0.66897  | 0.99536 | 1.1949  | 0.13018 | 0.17662 | 0.98577 | 1.0874  | 0.042198 | 0.65055  | 0.99508 |
| 6 | 137963070 | chr6:137963070:D | 5 | 0.01169  | 0.9318  | 0.4923 | 0.88857 | 0.12924 | 0.43839  | 0.98741 | 0.9038  | 0.055712 | 0.068629  | 0.9699  | 0.9116   | 0.086194 | 0.33682  | 0.98057 | 1.1396  | 0.11813 | 0.23932 | 0.98794 | 0.93342 | 0.038187 | 0.61093  | 0.98571 |
| 6 | 137963183 | rs184855350      | 4 | 0.62695  | 1.1295  | 0.7751 | 0.91486 | 0.99531 | 0.96298  | 0.79503 | 1.4498  | 0.5761   | 0.39286   | 0.75105 | 0.2869   | 0.86593  | 0.33786  | 0.72352 | --      | --      | --      | --      | 0.97894 | 0.31082  | 0.89667  | 0.79643 |
| 6 | 137963367 | chr6:137963367:1 | 5 | 0.1639   | 1.0456  | 0.5659 | 0.97921 | 0.14178 | 0.77389  | 0.93987 | 1.0032  | 0.063121 | 0.96826   | 0.94348 | 0.9831   | 0.10402  | 0.82948  | 0.95915 | 1.255   | 0.13669 | 0.07661 | 0.93086 | 1.0647  | 0.043502 | 0.72675  | 0.94742 |
| 6 | 137963374 | rs192779512      | 2 | 0.6972   | 0.6895  | 0.9219 | --      | --      | --       | --      | 0.7297  | 1.1172   | 0.50713   | 0.38242 | --       | --       | --       | --      | 0.59068 | 1.8448  | 0.56098 | 0.47712 | --      | --       | --       | --      |
| 6 | 137963375 | rs184603277      | 2 | 0.6092   | 0.6668  | 0.2316 | 0.17367 | 1.3942  | 0.19357  | 0.36499 | 1.0637  | 0.59305  | 0.77924   | 0.34223 | --       | --       | --       | --      | --      | --      | --      | --      | --      | --       | --       | --      |
| 6 | 137963394 | rs9402909        | 5 | 0.02091  | 0.9367  | 0.4897 | 0.89826 | 0.13015 | 0.51394  | 0.96378 | 0.89909 | 0.056222 | 0.051969  | 0.94685 | 0.92233  | 0.086815 | 0.40319  | 0.96718 | 1.141   | 0.11928 | 0.23017 | 0.96714 | 0.94183 | 0.038627 | 0.73688  | 0.96575 |
| 6 | 137963523 | rs9389527        | 5 | 0.01261  | 0.9328  | 0.449  | 0.88683 | 0.12894 | 0.43359  | 0.99077 | 0.90052 | 0.055426 | 0.060288  | 0.97739 | 0.90736  | 0.085946 | 0.31306  | 0.99536 | 1.1446  | 0.11783 | 0.22363 | 0.98975 | 0.9375  | 0.038017 | 0.66649  | 0.99425 |
| 6 | 137963527 | rs80221081       | 2 | 0.5956   | 0.5739  | 0.6832 | --      | --      | --       | --      | 0.74969 | 1.2339   | 0.81699   | 0.7094  | --       | --       | --       | --      | 0.2901  | 1.972   | 0.39163 | 0.61326 | --      | --       | --       | --      |
| 6 | 137963592 | rs507779         | 5 | 0.3654   | 1.0537  | 0.0574 | 1.3072  | 0.14643 | 0.050864 | 0.98894 | 1.109   | 0.064827 | 0.10444   | 0.97618 | 1.123    | 0.09693  | 0.25158  | 0.99103 | 0.76722 | 0.13591 | 0.03963 | 0.98159 | 1.0209  | 0.044934 | 0.83758  | 0.98747 |
| 6 | 137963649 | rs181476542      | 5 | 0.4413   | 0.7827  | 0.9209 | 0.38204 | 1.2811  | 0.23038  | 0.42323 | 0.82671 | 0.70167  | 0.61643   | 0.52485 | 0.6707   | 1.1771   | 0.27875  | 0.44061 | 0.3309  | 1.3008  | 0.16664 | 0.52553 | 0.91786 | 0.041009 | 0.82861  | 0.51804 |
| 6 | 137963681 | rs12661062       | 5 | 0.1589   | 1.1003  | 0.1422 | 0.97203 | 0.20376 | 0.74624  | 0.992   | 1.155   | 0.091015 | 0.10403   | 0.9688  | 1.3947   | 0.13002  | 0.103357 | 0.99821 | 0.82751 | 0.17327 | 0.28264 | 0.98535 | 1.0693  | 0.063942 | 0.13604  | 0.99021 |
| 6 | 137963954 | rs189231076      | 5 | 0.4095   | 0.8962  | 0.4668 | 0.79167 | 0.74574 | 0.48699  | 0.78977 | 1.1214  | 0.26416  | 0.62064   | 0.89522 | 1.3738   | 0.35278  | 0.09676  | 0.9621  | 0.97071 | 0.95772 | 0.96429 | 0.72632 | 0.72813 | 0.1786   | 0.3136   | 0.94037 |
| 6 | 137964098 | rs145069673      | 5 | 0.1122   | 1.2569  | 0.6088 | 0.83656 | 0.50916 | 0.64318  | 0.74642 | 1.4386  | 0.25965  | 0.08982   | 0.7769  | 0.83981  | 0.37547  | 0.59695  | 0.87069 | 2.0679  | 0.66892 | 0.11553 | 0.71821 | 1.3411  | 0.22218  | 0.013417 | 0.75184 |
| 6 | 137964160 | rs13218237       | 5 | 0.7902   | 0.9873  | 0.7493 | 1.0958  | 0.23236 | 0.7679   | 0.83603 | 1.0325  | 0.49715  | 0.73222   | 0.9745  | 0.10199  | 0.15147  | 0.96793  | 0.98447 | 0.7822  | 0.19438 | 0.21315 | 0.96171 | 0.97809 | 0.052258 | 0.45832  | 0.97322 |
| 6 | 137964205 | rs111578151      | 5 | 0.3891   | 0.8919  | 0.4629 | 0.76294 | 0.73863 | 0.45548  | 0.80183 | 1.1158  | 0.26422  | 0.63891   | 0.90473 | 1.3726   | 0.35284  | 0.39826  | 0.96416 | 0.96418 | 0.95751 | 0.95643 | 0.74841 | 0.72549 | 0.17862  | 0.30654  | 0.94471 |
| 6 | 137964358 | rs140898065      | 3 | 0.7211   | 0.7403  | 0.1229 | --      | --      | --       | --      | 1.3315  | 0.94191  | 0.66192   | 0.72045 | 0.022776 | 1.9316   | 0.039206 | 0.80797 | --      | --      | --      | --      | 1.3643  | 0.59194  | 0.41548  | 0.8277  |
| 6 | 137964385 | rs149737674      | 2 | 0.7525   | 0.7299  | 0.8312 | --      | --      | --       | --      | 0.83761 | 1.1889   | 0.90662   | 0.67194 | --       | --       | --       | --      | 0.52525 | 1.8383  | 0.52947 | 0.52623 | --      | --       | --       | --      |
| 6 | 137964505 | rs4896287        | 5 | 0.1637   | 1.0971  | 0.1622 | 0.97586 | 0.2069  | 0.74484  | 0.97429 | 1.1521  | 0.091844 | 0.10692   | 0.95105 | 1.3846   | 0.1313   | 0.014786 | 0.97788 | 0.82996 | 0.17471 | 0.2865  | 0.97117 | 1.0626  | 0.064708 | 0.17506  | 0.96806 |
| 6 | 137964623 | rs628099         | 5 | 0.9333   | 0.9941  | 0.065  | 1.5     | 0.18296 | 0.010947 | 0.99598 | 1.0441  | 0.080141 | 0.60344   | 0.98076 | 0.89773  | 0.12548  | 0.33522  | 0.99605 | 0.75317 | 0.17099 | 0.09898 | 0.98843 | 0.97428 | 0.055423 | 0.3195   | 0.99365 |
| 6 | 137964697 | rs62432712       | 5 | 0.6485   | 0.9845  | 0.7906 | 0.91975 | 0.16198 | 0.6024   | 0.97636 | 1.0378  | 0.071308 | 0.54021   | 0.94406 | 0.91706  | 0.10023  | 0.44033  | 0.99444 | 0.8895  | 0.15171 | 0.43403 | 0.9631  | 0.99221 | 0.0459   | 0.56506  | 0.98733 |
| 6 | 137964825 | rs9484078        | 5 | 0.009534 | 0.9303  | 0.4689 | 0.88656 | 0.12874 | 0.43397  | 0.99417 | 0.90461 | 0.055429 | 0.072555  | 0.97928 | 0.90884  | 0.085611 | 0.32343  | 0.99727 | 1.144   | 0.11764 | 0.22751 | 0.99353 | 0.93062 | 0.038009 | 0.55475  | 0.99549 |
| 6 | 137964930 | rs9494841        | 5 | 0.5525   | 1.0452  | 0.5557 | 1.45    |         |          |         |         |          |           |         |          |          |          |         |         |         |         |         |         |          |          |         |

|   |           |                  |   |          |        |        |         |         |          |         |         |          |          |          |         |          |          |         |          |         |         |         |         |          |         |         |         |
|---|-----------|------------------|---|----------|--------|--------|---------|---------|----------|---------|---------|----------|----------|----------|---------|----------|----------|---------|----------|---------|---------|---------|---------|----------|---------|---------|---------|
| 6 | 137969492 | rs4142969        | 5 | 0.1443   | 0.9295 | 0.1445 | 0.87365 | 0.15141 | 0.52871  | 0.97852 | 0.8495  | 0.064222 | 0.010447 | 0.97378  | 0.95939 | 0.10263  | 0.7164   | 0.99118 | 1.2524   | 0.13767 | 0.08248 | 0.9468  | 0.91448 | 0.045409 | 0.22037 | 0.98312 |         |
| 6 | 137969589 | rs17203483       | 2 | 0.7268   | 0.7069 | 0.85   | --      | --      | --       | --      | 0.79711 | 1.1788   | 0.85272  | 0.67303  | --      | --       | --       | --      | --       | 0.52723 | 1.8413  | 0.5318  | 0.5268  | --       | --      | --      |         |
| 6 | 137969773 | rs185641532      | 2 | 0.6122   | 0.5959 | 0.3201 | --      | --      | --       | --      | --      | --       | 0.092754 | 2.1313   | 0.15245 | 0.78886  | --       | --      | --       | --      | --      | --      | 1.0373  | 1.1634   | 0.68862 | 0.70011 |         |
| 6 | 137969775 | rs651320         | 5 | 0.9265   | 0.9936 | 0.0727 | 1.4942  | 0.18457 | 0.010715 | 0.9869  | 1.045   | 0.079842 | 0.59343  | 0.99434  | 0.89797 | 0.12554  | 0.33635  | 0.99495 | 0.75739  | 0.17167 | 0.10814 | 0.98857 | 0.97262 | 0.055507 | 0.29372 | 0.99264 |         |
| 6 | 137969951 | rs694733         | 5 | 0.944    | 0.995  | 0.0658 | 1.497   | 0.18314 | 0.011139 | 0.99105 | 1.0484  | 0.079482 | 0.56552  | 1        | 0.89815 | 0.12548  | 0.33762  | 0.99856 | 0.75548  | 0.17083 | 0.10316 | 0.99093 | 0.97342 | 0.055394 | 0.30439 | 0.99933 |         |
| 6 | 137970014 | rs694586         | 5 | 0.6699   | 1.0878 | 0.0316 | 3.7387  | 0.54964 | 0.039323 | 0.92896 | 0.80059 | 0.1941   | 0.23253  | 0.95334  | 0.73118 | 0.34259  | 0.43045  | 0.9951  | 1.8622   | 0.38754 | 0.10808 | 0.94237 | 0.93356 | 0.13468  | 0.49119 | 0.96923 |         |
| 6 | 137970295 | rs13191300       | 5 | 0.9254   | 0.9935 | 0.0703 | 1.4933  | 0.18286 | 0.011785 | 0.99267 | 1.0424  | 0.079643 | 0.61663  | 0.99609  | 0.89785 | 0.12546  | 0.33576  | 0.99585 | 0.75625  | 0.17071 | 0.1038  | 0.98963 | 0.97397 | 0.055394 | 0.31    | 0.99371 |         |
| 6 | 137970471 | rs116956322      | 5 | 0.9381   | 0.9958 | 0.9336 | 1.0823  | 0.26525 | 0.84441  | 0.81487 | 1.0229  | 0.10632  | 0.82571  | 0.9365   | 0.90971 | 0.17967  | 0.49977  | 0.94329 | 0.85264  | 0.24473 | 0.44131 | 0.89717 | 1.0058  | 0.074161 | 0.75957 | 0.93864 |         |
| 6 | 137970505 | rs1889135        | 5 | 0.009444 | 0.9303 | 0.4847 | 0.88472 | 0.12883 | 0.4247   | 0.99403 | 0.90537 | 0.055153 | 0.076992 | 0.98916  | 0.9092  | 0.085606 | 0.3249   | 0.99672 | 1.1404   | 0.11779 | 0.23743 | 0.99096 | 0.9308  | 0.038013 | 0.55639 | 0.99437 |         |
| 6 | 137970706 | rs1811972        | 5 | 0.4458   | 1.0459 | 0.0501 | 1.2704  | 0.14628 | 0.081186 | 0.99697 | 1.1073  | 0.064508 | 0.11422  | 0.9954   | 1.1109  | 0.096508 | 0.30181  | 0.99759 | 0.74163  | 0.13569 | 0.02164 | 0.99578 | 1.0289  | 0.045047 | 0.61318 | 0.99502 |         |
| 6 | 137970715 | rs1186348        | 5 | 0.4452   | 1.0459 | 0.0504 | 1.2703  | 0.14629 | 0.08118  | 0.99687 | 1.107   | 0.064554 | 0.11515  | 0.99461  | 1.1113  | 0.096507 | 0.30021  | 0.99759 | 0.74183  | 0.1357  | 0.02176 | 0.99591 | 1.0289  | 0.045048 | 0.61266 | 0.99492 |         |
| 6 | 137970734 | rs187781878      | 2 | 0.6934   | 0.8023 | 0.911  | --      | --      | --       | --      | 0.87577 | 0.96247  | 0.85947  | 0.67203  | 0.76733 | 0.68632  | 0.91754  | 0.98412 | --       | --      | --      | --      | --      | --       | --      |         |         |
| 6 | 137970814 | rs191605810      | 2 | 0.7267   | 0.6567 | 0.9982 | --      | --      | --       | --      | 0.6544  | 1.9224   | 0.48771  | 0.35828  | --      | --       | --       | --      | --       | --      | --      | --      | 0.65814 | 1.5429   | 0.78486 | 0.54016 |         |
| 6 | 137970840 | rs658376         | 5 | 0.4444   | 1.0464 | 0.0484 | 1.2672  | 0.14642 | 0.087362 | 1       | 1.1092  | 0.065289 | 0.10852  | 1        | 1.1149  | 0.096778 | 0.29058  | 1       | 0.74055  | 0.13554 | 0.0211  | 1       | 1.0295  | 0.044969 | 0.61536 | 1       |         |
| 6 | 137970954 | rs928721         | 5 | 0.01029  | 0.9311 | 0.5009 | 0.88453 | 0.12888 | 0.42479  | 0.99363 | 0.90892 | 0.056111 | 0.09029  | 0.99047  | 0.9098  | 0.085609 | 0.32305  | 0.99676 | 1.1389   | 0.11786 | 0.24203 | 0.98844 | 0.93077 | 0.038015 | 0.55643 | 0.99447 |         |
| 6 | 137970958 | rs35858108       | 5 | 0.1806   | 1.0418 | 0.6861 | 0.9914  | 0.13644 | 0.79802  | 0.99459 | 1.0052  | 0.060114 | 0.94661  | 0.99329  | 0.99207 | 0.10075  | 0.88324  | 0.99587 | 1.2154   | 0.12858 | 0.13174 | 0.98894 | 1.0564  | 0.04155  | 0.98233 | 0.99389 |         |
| 6 | 137971064 | rs928720         | 5 | 0.01016  | 0.9309 | 0.4998 | 0.88418 | 0.1288  | 0.42302  | 0.99382 | 0.90866 | 0.055114 | 0.089299 | 0.99024  | 0.90895 | 0.085612 | 0.32338  | 0.99689 | 1.1389   | 0.11786 | 0.24222 | 0.98861 | 0.93069 | 0.038017 | 0.55408 | 0.99441 |         |
| 6 | 137971217 | chr6:137971217:D | 5 | 0.9434   | 1.0068 | 0.3773 | 1.9544  | 0.485   | 0.051816 | 0.60814 | 0.87954 | 0.17708  | 0.30655  | 0.6913   | 0.77558 | 0.29242  | 0.28461  | 0.70315 | 1.4168   | 0.35548 | 0.18061 | 0.71484 | 1.0331  | 0.121    | 0.94864 | 0.70925 |         |
| 6 | 137971229 | rs62432714       | 5 | 0.7528   | 0.9809 | 0.9635 | 1.1301  | 0.27834 | 0.39801  | 0.4964  | 0.99698 | 0.11975  | 0.9944   | 0.53975  | 0.94235 | 0.17389  | 0.51102  | 0.5893  | 1.1298   | 0.31655 | 0.36748 | 0.44758 | 0.9598  | 0.084415 | 0.26132 | 0.53808 |         |
| 6 | 137971233 | rs34641543       | 5 | 0.7352   | 1.0215 | 0.914  | 1.2794  | 0.27087 | 0.099308 | 0.52976 | 0.97786 | 0.1233   | 0.77065  | 0.54021  | 0.95582 | 0.18899  | 0.67071  | 0.62541 | 1.0793   | 0.30042 | 0.64831 | 0.47309 | 1.03    | 0.085977 | 0.68206 | 0.57902 |         |
| 6 | 137971492 | rs112857044      | 3 | 0.7895   | 1.1263 | 0.7071 | --      | --      | --       | --      | 1.5486  | 0.7462   | 0.52518  | 0.85654  | --      | --       | --       | --      | --       | 1.8727  | 1.2048  | 0.50343 | 0.8502  | 0.78484  | 0.62593 | 0.68307 | 0.75705 |
| 6 | 137971612 | rs184611852      | 5 | 0.3281   | 0.9058 | 0.9237 | 1.2665  | 0.4118  | 0.39636  | 0.56271 | 0.88666 | 0.18748  | 0.29061  | 0.6101   | 0.94681 | 0.29842  | 0.68326  | 0.67897 | 1.0555   | 0.52019 | 0.8232  | 0.39817 | 0.86152 | 0.14362  | 0.16504 | 0.57721 |         |
| 6 | 137971714 | rs486165         | 5 | 0.01807  | 1.0685 | 0.7963 | 1.1737  | 0.12909 | 0.2296   | 0.989   | 1.0762  | 0.055651 | 0.18638  | 0.97202  | 1.0801  | 0.086451 | 0.41065  | 0.99011 | 0.94183  | 0.11993 | 0.55742 | 0.97548 | 1.0676  | 0.038194 | 0.69004 | 0.98231 |         |
| 6 | 137971727 | rs672612         | 5 | 0.9004   | 0.9912 | 0.0692 | 1.4892  | 0.18304 | 0.012149 | 0.98959 | 1.0393  | 0.076993 | 0.64238  | 0.99082  | 0.89775 | 0.12548  | 0.33489  | 0.99521 | 0.750188 | 0.17017 | 0.09605 | 1       | 0.97411 | 0.055388 | 0.30781 | 0.99234 |         |
| 6 | 137971814 | rs9389530        | 5 | 0.009932 | 0.9307 | 0.5333 | 0.88523 | 0.12887 | 0.42852  | 0.99297 | 0.90864 | 0.055101 | 0.089205 | 0.99049  | 0.90895 | 0.085611 | 0.32348  | 0.99693 | 1.1307   | 0.11778 | 0.26855 | 0.98755 | 0.93091 | 0.038018 | 0.55737 | 0.99443 |         |
| 6 | 137971834 | rs144435658      | 4 | 0.75     | 1.2339 | 0.9615 | 2.0367  | 0.20676 | 0.43741  | 0.7106  | 0.71184 | 1.802    | 0.55198  | 0.34455  | --      | --       | --       | --      | 0.82643  | 1.3807  | 0.87445 | 0.69535 | 1.5268  | 0.90095  | 0.24933 | 0.51459 |         |
| 6 | 137971858 | rs13199053       | 5 | 0.1243   | 1.0488 | 0.5327 | 0.99708 | 0.13817 | 0.86571  | 0.98763 | 0.9994  | 0.060674 | 0.97421  | 0.9962   | 0.96869 | 0.10271  | 0.72051  | 0.99735 | 1.2248   | 0.12921 | 0.12198 | 0.98906 | 1.0751  | 0.042127 | 0.87176 | 0.99539 |         |
| 6 | 137971948 | rs117267400      | 2 | 0.7258   | 0.706  | 0.851  | --      | --      | --       | --      | 0.79547 | 1.1788   | 0.85082  | 0.67388  | --      | --       | --       | --      | --       | 0.52756 | 1.8414  | 0.53229 | 0.52701 | --       | --      | --      |         |
| 6 | 137972038 | rs684474         | 5 | 0.5735   | 1.1333 | 0.0131 | 4.1127  | 0.55585 | 0.032983 | 0.93247 | 0.85156 | 0.20097  | 0.29119  | 0.96121  | 0.68936 | 0.34713  | 0.34752  | 0.97956 | 2.195    | 0.41037 | 0.06147 | 0.94751 | 0.90814 | 0.13842  | 0.39165 | 0.97622 |         |
| 6 | 137972044 | rs74473088       | 5 | 0.8839   | 1.0246 | 0.0962 | 1.693   | 0.44199 | 0.14679  | 0.80084 | 1.3832  | 0.19791  | 0.05323  | 0.87144  | 0.55605 | 0.32516  | 0.027854 | 0.98125 | 1.0778   | 0.43479 | 0.83185 | 0.9118  | 0.91034 | 0.13444  | 0.45632 | 0.89794 |         |
| 6 | 137972096 | rs139449073      | 4 | 0.7501   | 1.2334 | 0.9616 | 2.0387  | 0.20657 | 0.43699  | 0.71093 | 0.71229 | 1.8004   | 0.5523   | 0.34467  | --      | --       | --       | --      | 0.82643  | 1.3807  | 0.87445 | 0.69535 | 1.5241  | 0.89925  | 0.25416 | 0.51555 |         |
| 6 | 137972125 | rs185288770      | 2 | 0.6114   | 0.5953 | 0.3204 | --      | --      | --       | --      | --      | --       | --       | 0.092837 | 2.1307  | 0.15293  | 0.78938  | --      | --       | --      | --      | 0.1358  | 1.1633  | 0.68783  | 0.70055 |         |         |
| 6 | 137972353 | rs146493105      | 4 | 0.7252   | 1.1316 | 0.994  | 1.5133  | 1.3813  | 0.58624  | 0.5058  | 1.1209  | 0.97352  | 0.69114  | 0.30114  | 1.2115  | 0.62654  | 0.53163  | 0.67752 | --       | --      | --      | --      | 0.10448 | 0.50224  | 0.87122 | 0.9192  |         |
| 6 | 137972591 | rs609095         | 5 | 0.0145   | 1.0704 | 0.7546 | 1.1667  | 0.12883 | 0.19695  | 0.9967  | 1.0816  | 0.054989 | 0.16338  | 0.99328  | 1.0785  | 0.086246 | 0.42479  | 0.99773 | 0.9386   | 0.11944 | 0.53868 | 0.98948 | 1.0682  | 0.03794  | 0.69076 | 0.49503 |         |
| 6 | 137972685 | rs35763148       | 5 | 0.8134   | 0.9887 | 0.7694 | 1.0872  | 0.23183 | 0.80191  | 0.83755 | 1.0348  | 0.094443 | 0.71368  | 0.98026  | 1.0227  | 0.15138  | 0.96468  | 0.98413 | 0.7892   | 0.19454 | 0.22777 | 0.96284 | 0.97872 | 0.06534  | 0.47546 | 0.97676 |         |
| 6 | 137972810 | rs517357         | 5 | 0.5068   | 1.1697 | 0.0059 | 4.4499  | 0.55441 | 0.028992 | 0.94057 | 0.79748 | 0.20024  | 0.24209  | 0.96348  | 0.69019 | 0.34659  | 0.3499   | 0.98082 | 2.328    | 0.39921 | 0.04289 | 0.96233 | 0.90884 | 0.13849  | 0.39569 | 0.97495 |         |
| 6 | 137972866 | rs187382857      | 2 | 0.5059   | 0.592  | 0.9073 | --      | --      | --       | --      | --      | --       | --       | 0.50037  | 1.6454  | 0.28168  | 0.4277   | --      | --       | --      | --      | 0.62243 | 0.89769 | 0.41011  | 0.30813 |         |         |
| 6 | 137973068 | rs2327838        | 5 | 0.6202   | 0.9833 | 0.7983 | 0.93829 | 0.16112 | 0.70253  | 1       | 1.0422  | 0.07014  | 0.50386  | 0.97426  | 0.91051 | 0.1      | 0.40336  | 1       | 0.90672  | 0.15029 | 0.51561 | 0.96803 | 0.98587 | 0.045719 | 0.65444 | 1       |         |
| 6 | 137973349 | rs17066881       | 5 | 0.8264   | 0.9896 | 0.7255 | 1.0956  | 0.22848 | 0.88363  | 0.87109 | 1.0433  | 0.094054 | 0.64986  | 0.98291  | 1.0113  | 0.15092  | 0.97644  | 0.98402 | 0.78172  | 0.19262 | 0.21069 | 0.97143 | 0.97927 | 0.064955 | 0.49612 | 0.98003 |         |
| 6 | 137973622 | rs688096         | 5 | 0.01592  | 1.0694 | 0.7443 | 1.1858  | 0.12885 | 0.19893  | 0.99735 | 1.08    | 0.054935 | 0.17034  | 0.9937   | 1.0786  | 0.086249 | 0.42463  | 0.99788 | 0.93483  | 0.11951 | 0.51479 | 0.99137 | 1.0675  | 0.037929 | 0.70053 | 0.99651 |         |
| 6 | 137973642 | rs9494843        | 3 | 0.9906   | 0.9948 | 0.6912 | --      | --      | --       | --      | 1.4999  | 0.7663   | 0.5717   | 0.86535  | --      | --       | --       | --      | --       | 1.4666  | 1.1848  | 0.6567  | 0.82418 | 0.69898  | 0.60147 | 0.55178 | 0.82771 |
| 6 | 137973682 | rs147105112      | 2 | 0.7208   | 0.7011 | 0.8576 | --      | --      | --       | --      | 0.78571 | 1.1789   | 0.83484  | 0.66533  | --      | --       | --       | --      | --       | 0.53057 | 1.8443  | 0.53652 | 0.5282  | --       | --      | --      |         |
| 6 | 137973730 | rs117079550      | 3 | 0.2933   | 1.5287 | 0.9692 | --      | --      | --       | --      | 1.5     |          |          |          |         |          |          |         |          |         |         |         |         |          |         |         |         |





|   |           |                  |   |          |        |        |         |         |          |         |         |          |          |         |         |          |          |         |         |         |         |         |         |          |          |         |         |
|---|-----------|------------------|---|----------|--------|--------|---------|---------|----------|---------|---------|----------|----------|---------|---------|----------|----------|---------|---------|---------|---------|---------|---------|----------|----------|---------|---------|
| 6 | 137988489 | rs143923420      | 4 | 0.4678   | 0.6778 | 0.6855 | --      | --      | --       | --      | 0.84794 | 0.97902  | 0.75932  | 0.42496 | 0.22179 | 1.3479   | 0.003288 | 0.48617 | 0.32683 | 1.3497  | 0.12595 | 0.42918 | 1.2127  | 0.86267  | 0.60627  | 0.33954 |         |
| 6 | 137988627 | rs182893656      | 5 | 0.9547   | 0.984  | 0.7153 | 0.55482 | 1.3173  | 0.22957  | 0.41779 | 1.9188  | 0.6388   | 0.021548 | 0.43928 | 0.93664 | 1.2914   | 0.8172   | 0.30252 | 0.37978 | 1.0621  | 0.17836 | 0.58625 | 0.93075 | 0.35826  | 0.98915  | 0.51777 |         |
| 6 | 137988709 | rs10782266       | 5 | 0.2009   | 1.0974 | 0.1039 | 0.94056 | 0.20444 | 0.68046  | 0.99039 | 1.1624  | 0.091043 | 0.095304 | 0.98925 | 1.3803  | 0.13032  | 0.016769 | 0.9974  | 0.78272 | 1.0605  | 0.16794 | 0.98471 | 1.0964  | 0.664776 | 0.054101 | 0.99112 |         |
| 6 | 137988731 | rs78398085       | 5 | 0.6073   | 0.8336 | 0.0648 | 0.793   | 0.59493 | 0.3946   | 0.81134 | 1.1346  | 0.49577  | 0.85286  | 0.81284 | 2.5484  | 0.60698  | 0.1544   | 0.86025 | 0.20685 | 0.61976 | 0.01516 | 0.85513 | 0.79036 | 0.39539  | 0.50743  | 0.68413 |         |
| 6 | 137988785 | rs628791         | 5 | 0.01549  | 1.0697 | 0.7219 | 1.1922  | 0.12855 | 0.18433  | 0.99881 | 1.0815  | 0.05487  | 0.16314  | 0.99659 | 1.0796  | 0.08625  | 0.41921  | 0.99863 | 0.93278 | 1.1198  | 0.5008  | 0.98648 | 1.0667  | 0.037916 | 0.69211  | 0.99755 |         |
| 6 | 137988801 | rs148300231      | 4 | 0.7356   | 1.2427 | 0.9676 | 2.1037  | 2.0384  | 0.41527  | 0.71578 | 0.78558 | 1.7983   | 0.66015  | 0.34669 | --      | --       | --       | --      | 0.82599 | 1.3808  | 0.87391 | 0.69502 | 1.4743  | 0.86331  | 0.33618  | 0.53385 |         |
| 6 | 137989203 | rs141441459      | 2 | 0.6911   | 0.6736 | 0.8704 | --      | --      | --       | --      | 0.7473  | 1.1802   | 0.77095  | 0.64258 | --      | --       | --       | --      | 0.52264 | 1.8458  | 0.53337 | 0.53467 | --      | --       | --       | --      |         |
| 6 | 137989251 | rs187636963      | 2 | 0.6911   | 0.6736 | 0.8704 | --      | --      | --       | --      | 0.7473  | 1.1802   | 0.77095  | 0.64258 | --      | --       | --       | --      | 0.52264 | 1.8458  | 0.53337 | 0.53467 | --      | --       | --       | --      |         |
| 6 | 137989264 | rs7768363        | 5 | 0.01294  | 0.9314 | 0.4008 | 0.88839 | 0.1313  | 0.45632  | 0.96056 | 0.89925 | 0.055851 | 0.057013 | 0.96766 | 0.91201 | 0.086584 | 0.34764  | 0.97337 | 1.1655  | 0.12068 | 0.16242 | 0.95744 | 0.93319 | 0.038655 | 0.54672  | 0.96946 |         |
| 6 | 137989356 | rs192009030      | 4 | 0.3328   | 0.4644 | 0.9007 | 0.20496 | 2.1236  | 0.50016  | 0.79134 | 0.69164 | 1.5272   | 0.65488  | 0.56852 | --      | --       | --       | --      | 0.33513 | 1.1712  | 0.30014 | 0.82704 | 1.4759  | 2.1572   | 0.16751  | 0.30515 |         |
| 6 | 137989538 | rs530181         | 5 | 0.01441  | 1.0704 | 0.7445 | 1.1914  | 0.12856 | 0.18669  | 0.99829 | 1.0818  | 0.054899 | 0.16283  | 0.99654 | 1.0794  | 0.086235 | 0.42101  | 0.9983  | 0.93846 | 1.11974 | 0.53625 | 0.98535 | 1.0675  | 0.037925 | 0.68252  | 0.99638 |         |
| 6 | 137989596 | rs74499631       | 2 | 0.5566   | 0.5413 | 0.659  | --      | --      | --       | --      | 0.72147 | 1.2302   | 0.76577  | 0.67808 | --      | --       | --       | --      | 0.25853 | 1.9732  | 0.37464 | 0.62707 | --      | --       | --       | --      |         |
| 6 | 137989828 | rs10447420       | 5 | 0.2107   | 0.0962 | 0.0982 | 0.93924 | 0.20417 | 0.67529  | 0.992   | 1.16    | 0.090998 | 0.09986  | 0.99032 | 1.3838  | 0.13033  | 0.016152 | 0.99789 | 0.77989 | 0.17596 | 0.16058 | 0.98196 | 1.0965  | 0.064772 | 0.054374 | 0.99169 |         |
| 6 | 137990198 | rs557529         | 5 | 0.8881   | 0.9902 | 0.071  | 1.5049  | 0.18426 | 0.009529 | 0.98542 | 1.0292  | 0.079545 | 0.73352  | 0.98857 | 0.89765 | 0.12558  | 0.33286  | 0.993   | 0.75291 | 0.17166 | 0.09865 | 0.98099 | 0.97419 | 0.055373 | 0.31432  | 0.99179 |         |
| 6 | 137990691 | rs140108595      | 5 | 0.5563   | 1.229  | 0.8708 | 0.67424 | 1.9205  | 0.59081  | 0.32733 | 0.86288 | 0.58045  | 0.61889  | 0.49368 | 1.1051  | 1.6501   | 0.88164  | 0.36698 | 2.5468  | 0.83791 | 0.07322 | 0.6587  | 1.3166  | 0.56722  | 0.024641 | 0.53561 |         |
| 6 | 137990703 | rs143270880      | 2 | 0.6917   | 0.6741 | 0.87   | --      | --      | --       | --      | 0.74803 | 1.1802   | 0.77186  | 0.64232 | --      | --       | --       | --      | 0.52264 | 1.8458  | 0.53337 | 0.53467 | --      | --       | --       | --      |         |
| 6 | 137990748 | chr6:137990748:D | 2 | 0.6942   | 0.6756 | 0.8473 | --      | --      | --       | --      | 0.76343 | 1.1826   | 0.80063  | 0.6552  | --      | --       | --       | --      | 0.49969 | 1.857   | 0.53237 | 0.5639  | --      | --       | --       | --      |         |
| 6 | 137991254 | rs477468         | 5 | 0.8819   | 0.9897 | 0.0754 | 1.5     | 0.18498 | 0.009967 | 0.98319 | 1.0293  | 0.079683 | 0.73256  | 0.98651 | 0.89729 | 0.1256   | 0.33112  | 0.99276 | 0.75392 | 1.0180  | 0.10028 | 0.97967 | 0.97435 | 0.055385 | 0.31585  | 0.99153 |         |
| 6 | 137991275 | rs150924830      | 5 | 0.3243   | 0.8585 | 0.9102 | 0.7352  | 0.60043 | 0.56333  | 0.56633 | 0.7757  | 0.24314  | 0.050752 | 0.5414  | 0.70749 | 0.46931  | 0.14251  | 0.54552 | 1.2582  | 0.86186 | 0.44049 | 0.36397 | 1.0027  | 0.24869  | 0.48768  | 0.43146 |         |
| 6 | 137991460 | rs2137868        | 5 | 0.007705 | 0.9284 | 0.5463 | 0.87884 | 0.12849 | 0.39683  | 0.99135 | 0.90418 | 0.055185 | 0.073034 | 0.98927 | 0.90703 | 0.085692 | 0.31224  | 0.99476 | 1.123   | 0.11847 | 0.29144 | 0.9829  | 0.93054 | 0.038086 | 0.50878  | 0.99021 |         |
| 6 | 137991507 | chr6:137991507:1 | 5 | 0.8774   | 0.9889 | 0.0705 | 1.5243  | 0.19011 | 0.007638 | 0.95479 | 1.0327  | 0.081782 | 0.70202  | 0.96218 | 0.88001 | 0.12905  | 0.25681  | 0.96672 | 0.75765 | 0.17559 | 0.10751 | 0.96178 | 0.97326 | 0.057012 | 0.32647  | 0.96331 |         |
| 6 | 137991626 | rs481095         | 5 | 0.01442  | 1.0705 | 0.7498 | 1.1906  | 0.12858 | 0.18869  | 0.99797 | 1.0819  | 0.054903 | 0.16214  | 0.99671 | 1.0789  | 0.086237 | 0.42444  | 0.99778 | 0.93951 | 0.11972 | 0.54304 | 0.98512 | 1.0675  | 0.037934 | 0.68297  | 0.99569 |         |
| 6 | 137991677 | rs146091397      | 5 | 0.1065   | 1.1826 | 0.6517 | 1.3429  | 0.45775 | 0.39199  | 0.83564 | 1.3548  | 0.21275  | 0.082857 | 0.82538 | 1.0285  | 0.24435  | 0.83201  | 0.90124 | 0.52059 | 0.64123 | 0.04472 | 0.42697 | 1.2012  | 0.14654  | 0.046507 | 0.84497 |         |
| 6 | 137991761 | rs9402913        | 5 | 0.009043 | 0.9298 | 0.5411 | 0.87858 | 0.1287  | 0.39552  | 0.9937  | 0.90778 | 0.055063 | 0.086291 | 0.99274 | 0.90697 | 0.085639 | 0.31305  | 0.99659 | 1.1267  | 0.11841 | 0.27846 | 0.98127 | 0.93126 | 0.038063 | 0.53272  | 0.99312 |         |
| 6 | 137991929 | rs146983365      | 2 | 0.6924   | 0.6748 | 0.8695 | --      | --      | --       | --      | 0.74911 | 1.1802   | 0.77324  | 0.64194 | --      | --       | --       | --      | 0.52264 | 1.8458  | 0.53337 | 0.53467 | --      | --       | --       | --      |         |
| 6 | 137991982 | rs12204334       | 5 | 0.1628   | 1.106  | 0.104  | 0.95103 | 0.20323 | 0.72891  | 0.98785 | 1.1652  | 0.090194 | 0.085801 | 0.98874 | 1.4011  | 0.12958  | 0.012526 | 0.9967  | 0.79591 | 0.17583 | 0.19432 | 0.98155 | 1.0995  | 0.064315 | 0.038834 | 0.98935 |         |
| 6 | 137992032 | rs2175891        | 5 | 0.1627   | 1.1061 | 0.1035 | 0.95334 | 0.20334 | 0.73852  | 0.98698 | 1.165   | 0.090175 | 0.085473 | 0.98754 | 1.4021  | 0.12955  | 0.012345 | 0.99708 | 0.79554 | 0.17582 | 0.19309 | 0.98058 | 1.099   | 0.06424  | 0.039091 | 0.98962 |         |
| 6 | 137992247 | rs117359107      | 2 | 0.6929   | 0.6753 | 0.8691 | --      | --      | --       | --      | 0.74984 | 1.1802   | 0.77416  | 0.64169 | --      | --       | --       | --      | 0.52264 | 1.8458  | 0.53337 | 0.53467 | --      | --       | --       | --      |         |
| 6 | 137992302 | rs77409392       | 2 | 0.6929   | 0.6753 | 0.8691 | --      | --      | --       | --      | 0.74984 | 1.1802   | 0.77416  | 0.64169 | --      | --       | --       | --      | 0.52264 | 1.8458  | 0.53337 | 0.53467 | --      | --       | --       | --      |         |
| 6 | 137992489 | rs186684681      | 3 | 0.2204   | 1.4357 | 0.6175 | --      | --      | --       | --      | 0.67293 | 1.1534   | 0.47513  | 0.44293 | 4.3861  | 1.5315   | 0.36212  | 0.79613 | --      | --      | --      | --      | 1.4488  | 0.31152  | 0.44203  | 0.83093 |         |
| 6 | 137992550 | rs678385         | 5 | 0.01583  | 1.0694 | 0.7286 | 1.191   | 0.12855 | 0.18747  | 0.99869 | 1.0804  | 0.054853 | 0.16906  | 0.9976  | 1.0799  | 0.086253 | 0.41804  | 0.99817 | 0.93352 | 0.11989 | 0.50498 | 0.98554 | 1.0667  | 0.037916 | 0.69212  | 0.99709 |         |
| 6 | 137992841 | rs1446693523     | 4 | 0.4444   | 1.1923 | 0.644  | --      | --      | --       | --      | 1.2987  | 0.3774   | 0.35135  | 0.69892 | 2.1722  | 0.60182  | 0.13145  | 0.76637 | 1.22    | 1.106   | 0.71814 | 0.56136 | 0.90673 | 0.34689  | 0.80087  | 0.67338 |         |
| 6 | 137993006 | rs117976703      | 5 | 0.3291   | 0.8475 | 0.822  | 1.9096  | 0.8363  | 0.18111  | 0.78534 | 1.0042  | 0.35478  | 0.99295  | 0.85723 | 0.68863 | 0.42103  | 0.30081  | 0.86477 | 0.71589 | 0.74568 | 0.41803 | 0.54364 | 0.80002 | 0.23596  | 0.1938   | 0.83343 |         |
| 6 | 137993049 | rs536331         | 5 | 0.3001   | 1.0295 | 0.6259 | 1.2129  | 0.13077 | 0.11032  | 0.99541 | 1.024   | 0.054999 | 0.69521  | 0.99541 | 0.94078 | 0.090015 | 0.41395  | 0.99743 | 1.0438  | 0.11934 | 0.72987 | 0.98485 | 1.0331  | 0.038227 | 0.46848  | 0.99488 |         |
| 6 | 137993157 | rs73774743       | 2 | 0.5111   | 0.4676 | 0.8832 | --      | --      | --       | --      | 0.37588 | 1.8834   | 0.14518  | 0.3262  | --      | --       | --       | --      | --      | --      | --      | --      | --      | 0.53369  | 1.4662   | 0.57523 | 0.52003 |
| 6 | 137993188 | rs12206392       | 5 | 0.2093   | 1.0963 | 0.099  | 0.93613 | 0.20386 | 0.65958  | 0.99336 | 1.1612  | 0.090902 | 0.09734  | 0.99112 | 1.3828  | 0.13035  | 0.016366 | 0.99775 | 0.78103 | 0.17615 | 0.16285 | 0.98222 | 1.0966  | 0.064814 | 0.053776 | 0.99094 |         |
| 6 | 137993232 | rs675520         | 5 | 0.01473  | 1.0702 | 0.7493 | 1.1905  | 0.12855 | 0.18805  | 0.99795 | 1.1015  | 0.054896 | 0.1644   | 0.99702 | 1.0798  | 0.086252 | 0.41846  | 0.99775 | 0.93936 | 0.11973 | 0.54156 | 0.9847  | 1.0671  | 0.037924 | 0.68901  | 0.99624 |         |
| 6 | 137993403 | rs686144         | 5 | 0.864    | 0.9884 | 0.0847 | 1.4812  | 0.18404 | 0.012311 | 0.98001 | 1.0244  | 0.079312 | 0.77899  | 0.98656 | 0.90062 | 0.12553  | 0.34412  | 0.99174 | 0.75054 | 0.1717  | 0.09313 | 0.97248 | 0.97728 | 0.055335 | 0.36377  | 0.99019 |         |
| 6 | 137993533 | chr6:137993533:D | 5 | 0.01436  | 1.0705 | 0.7494 | 1.1909  | 0.12856 | 0.18781  | 0.99819 | 1.0818  | 0.054898 | 0.16276  | 0.99697 | 1.0789  | 0.086233 | 0.42486  | 0.99789 | 0.93952 | 0.11972 | 0.54312 | 0.98512 | 1.0676  | 0.037931 | 0.68003  | 0.99583 |         |
| 6 | 137993578 | rs2152655        | 5 | 0.01304  | 0.9258 | 0.3512 | 0.86706 | 0.12939 | 0.317    | 0.98645 | 0.88523 | 0.055088 | 0.029923 | 0.99024 | 0.93805 | 0.085955 | 0.54804  | 0.98912 | 1.1552  | 0.11853 | 0.1992  | 0.97999 | 0.92482 | 0.038238 | 0.39618  | 0.98724 |         |
| 6 | 137993595 | rs117234946      | 5 | 0.4097   | 0.8965 | 0.4703 | 0.77556 | 0.72631 | 0.4786   | 0.80373 | 1.1232  | 0.26061  | 0.6209   | 0.9206  | 1.3704  | 0.35433  | 0.40241  | 0.96074 | 0.91419 | 0.95444 | 0.89432 | 0.72943 | 0.72961 | 0.17879  | 0.32463  | 0.9424  |         |
| 6 | 137993647 | rs114082116      | 3 | 0.793    | 1.1242 | 0.7103 | --      | --      | --       | --      | 1.5687  | 0.74452  | 0.50351  | 0.83283 | --      | --       | --       | --      | 1.791   | 1.2064  | 0.52013 | 0.82509 | 0.78146 | 0.62834  | 0.64352  | 0.72373 |         |
| 6 | 137993851 | rs146138851      | 4 | 0.9069   | 1.0303 |        |         |         |          |         |         |          |          |         |         |          |          |         |         |         |         |         |         |          |          |         |         |

|   |           |                  |   |          |        |        |         |         |          |         |         |          |           |         |         |          |          |         |         |         |         |         |         |          |           |         |    |    |
|---|-----------|------------------|---|----------|--------|--------|---------|---------|----------|---------|---------|----------|-----------|---------|---------|----------|----------|---------|---------|---------|---------|---------|---------|----------|-----------|---------|----|----|
| 6 | 137998177 | rs117846255      | 2 | 0.6759   | 0.6586 | 0.8737 | --      | --      | --       | --      | 0.72939 | 1.1881   | 0.74333   | 0.63455 | --      | --       | --       | --      | 0.51451 | 1.8469  | 0.529   | 0.53969 | --      | --       | --        | --      | -- | -- |
| 6 | 137998418 | rs181966860      | 4 | 0.173    | 0.6627 | 0.8255 | 0.3041  | 1.6142  | 0.38207  | 0.5038  | 0.54349 | 0.49441  | 0.03112   | 0.55041 | 0.55911 | 0.72232  | 0.14308  | 0.50474 | --      | --      | --      | --      | 0.90685 | 0.46735  | 0.56151   | 0.41556 | -- | -- |
| 6 | 137998619 | rs131950641      | 5 | 0.351    | 0.8994 | 0.7279 | 1.5837  | 0.5464  | 0.089126 | 0.8239  | 0.95089 | 0.22345  | 0.80858   | 0.84763 | 0.99648 | 0.28302  | 0.95804  | 0.94819 | 1.1216  | 0.58374 | 0.86332 | 0.81505 | 0.79107 | 0.16116  | 0.25551   | 0.84716 | -- | -- |
| 6 | 137998816 | rs74921918       | 5 | 0.6282   | 0.8555 | 0.1005 | 0.63971 | 0.56557 | 0.23533  | 0.83558 | 1.1937  | 0.49892  | 0.74682   | 0.79466 | 2.4937  | 0.59583  | 0.15225  | 0.85711 | 0.23264 | 0.66481 | 0.02065 | 0.79555 | 0.84099 | 0.34678  | 0.6515    | 0.74651 | -- | -- |
| 6 | 137998890 | rs587516         | 5 | 0.9167   | 1.0183 | 0.0731 | 2.5784  | 0.52471 | 0.064264 | 0.90285 | 0.78659 | 0.19216  | 0.19022   | 0.93936 | 0.71066 | 0.34308  | 0.38154  | 0.95964 | 1.834   | 0.36877 | 0.09123 | 0.92677 | 0.91154 | 0.13354  | 0.37724   | 0.94572 | -- | -- |
| 6 | 137998932 | rs118096079      | 2 | 0.6653   | 0.6484 | 0.8753 | --      | --      | --       | --      | 0.71757 | 1.1918   | 0.72562   | 0.63151 | --      | --       | --       | --      | 0.50818 | 1.8473  | 0.52508 | 0.54296 | --      | --       | --        | --      | -- | -- |
| 6 | 137998959 | rs144246698      | 4 | 0.9707   | 0.9825 | 0.815  | 0.31229 | 1.6318  | 0.40869  | 0.63969 | 1.4533  | 1.0641   | 0.3089    | 0.35499 | 1.6392  | 1.039    | 0.43613  | 0.49589 | --      | --      | --      | 0.81715 | 0.6877  | 0.59397  | 0.44022   | --      | -- |    |
| 6 | 137999026 | rs147767632      | 3 | 0.6669   | 1.3479 | 0.8911 | 2.504   | 2.0032  | 0.3137   | 0.67689 | --      | --       | --        | --      | --      | --       | --       | --      | 0.82447 | 1.3805  | 0.87195 | 0.69264 | 1.4594  | 0.87576  | 0.33107   | 0.52054 | -- | -- |
| 6 | 137999160 | rs34996815       | 5 | 0.1196   | 1.0495 | 0.4863 | 0.99746 | 0.13779 | 0.86142  | 0.98744 | 1.0062  | 0.060815 | 0.93757   | 0.98999 | 0.96492 | 0.10284  | 0.69152  | 0.99531 | 1.2546  | 0.12812 | 0.08312 | 0.98955 | 1.0705  | 0.042231 | 0.93726   | 0.99183 | -- | -- |
| 6 | 137999286 | rs9376293        | 5 | 0.005329 | 0.9246 | 0.5864 | 1.088   | 1.1259  | 0.30671  | 0.98469 | 0.92064 | 0.055468 | 0.1432    | 0.98828 | 0.85425 | 0.088553 | 0.088747 | 0.99165 | 0.98789 | 0.11443 | 0.94626 | 0.98204 | 0.91938 | 0.038572 | 0.20025   | 0.98986 | -- | -- |
| 6 | 137999545 | rs74798246       | 2 | 0.6608   | 0.6441 | 0.8759 | --      | --      | --       | --      | 0.71259 | 1.1933   | 0.71763   | 0.62997 | --      | --       | --       | --      | 0.50549 | 1.8476  | 0.52396 | 0.54506 | --      | --       | --        | --      | -- | -- |
| 6 | 137999556 | chr6:137999562:D | 5 | 0.61     | 0.9893 | 0.827  | 0.93093 | 0.15929 | 0.58449  | 0.96319 | 1.0563  | 0.06883  | 0.37254   | 0.95873 | 0.9517  | 0.099684 | 0.65175  | 0.97958 | 0.95472 | 0.14982 | 0.76023 | 0.95763 | 0.96617 | 0.04516  | 0.84942   | 0.97578 | -- | -- |
| 6 | 137999585 | rs145009641      | 5 | 0.3275   | 0.8584 | 0.9004 | 0.73332 | 0.59972 | 0.55927  | 0.56757 | 0.77257 | 0.24302  | 0.04907   | 0.5447  | 0.70601 | 0.46888  | 0.14056  | 0.54697 | 1.2601  | 0.86202 | 0.44015 | 0.36656 | 1.011   | 0.24883  | 0.42662   | 0.43323 | -- | -- |
| 6 | 137999585 | chr6:137999852:D | 5 | 0.01064  | 0.9311 | 0.5763 | 0.88992 | 0.13014 | 0.42385  | 0.96922 | 0.91715 | 0.055102 | 0.1244    | 0.97617 | 0.92645 | 0.086665 | 0.43669  | 0.9792  | 1.1261  | 0.11691 | 0.28292 | 0.97727 | 0.92352 | 0.038195 | 0.48032   | 0.97708 | -- | -- |
| 6 | 137999662 | rs35931823       | 5 | 0.8549   | 0.9868 | 0.0571 | 1.5079  | 0.18541 | 0.00762  | 0.973   | 1.0287  | 0.079789 | 0.7242    | 0.98377 | 0.8929  | 0.12572  | 0.30825  | 0.98858 | 0.73259 | 0.17202 | 0.07327 | 0.97905 | 0.97664 | 0.05553  | 0.33789   | 0.98114 | -- | -- |
| 6 | 138000176 | rs34949469       | 5 | 0.8422   | 0.9858 | 0.0626 | 1.5027  | 0.18561 | 0.008942 | 0.98103 | 1.0258  | 0.07989  | 0.76118   | 0.98602 | 0.89487 | 0.12576  | 0.31911  | 0.99142 | 0.73453 | 0.17265 | 0.0785  | 0.98332 | 0.97472 | 0.055599 | 0.32047   | 0.98821 | -- | -- |
| 6 | 138000398 | rs617328         | 5 | 0.08885  | 0.9496 | 0.7334 | 1.0659  | 1.13519 | 0.46057  | 0.98567 | 0.97039 | 0.059666 | 0.63282   | 0.98992 | 1.0037  | 0.099767 | 0.90343  | 0.99592 | 0.8621  | 0.12366 | 0.24902 | 0.98848 | 0.93087 | 0.041427 | 0.78569   | 0.99194 | -- | -- |
| 6 | 138000470 | rs4896296        | 5 | 0.225    | 1.0943 | 0.0905 | 0.9252  | 0.20354 | 0.61959  | 0.9891  | 1.1502  | 0.090815 | 0.12229   | 0.98559 | 1.382   | 0.13027  | 0.016555 | 0.99867 | 0.77245 | 0.17593 | 0.14539 | 0.98553 | 1.1103  | 0.064543 | 0.034431  | 0.99289 | -- | -- |
| 6 | 138000789 | chr6:138000789:D | 5 | 0.1264   | 0.9215 | 0.13   | 0.88314 | 0.15677 | 0.51642  | 0.92336 | 0.82517 | 0.066626 | 0.0027767 | 0.93248 | 0.95132 | 0.1092   | 0.64316  | 0.9401  | 1.2379  | 0.14114 | 0.09994 | 0.91013 | 0.91357 | 0.047535 | 0.20312   | 0.9334  | -- | -- |
| 6 | 138000791 | chr6:138000791:D | 5 | 0.2306   | 0.936  | 0.0817 | 0.89999 | 0.1487  | 0.61254  | 0.98538 | 0.83627 | 0.063717 | 0.0049343 | 0.97925 | 0.95989 | 0.1025   | 0.71676  | 0.99171 | 1.2698  | 0.13312 | 0.07108 | 0.98139 | 0.91613 | 0.045091 | 0.23166   | 0.9838  | -- | -- |
| 6 | 138001115 | rs6921233        | 5 | 0.005137 | 0.9253 | 0.5444 | 0.88648 | 0.1286  | 0.40364  | 0.98313 | 0.91119 | 0.054771 | 0.10185   | 0.99053 | 0.92654 | 0.085763 | 0.43279  | 0.99444 | 1.1251  | 0.11637 | 0.29104 | 0.989   | 0.91617 | 0.037913 | 0.40263   | 0.99169 | -- | -- |
| 6 | 138001204 | rs12202094       | 5 | 0.232    | 1.0936 | 0.086  | 0.92623 | 0.20379 | 0.62613  | 0.9836  | 1.1522  | 0.090928 | 0.11662   | 0.98271 | 1.3821  | 0.13018  | 0.01654  | 1       | 0.76901 | 0.17563 | 0.13765 | 0.98354 | 1.1094  | 0.064142 | 0.037639  | 1       | -- | -- |
| 6 | 138001250 | rs149627178      | 3 | 0.6766   | 1.3395 | 0.9082 | 2.1566  | 2.0351  | 0.39372  | 0.71598 | --      | --       | --        | --      | --      | --       | --       | --      | 0.82578 | 1.3808  | 0.87354 | 0.6944  | 1.4942  | 0.88742  | 0.30906   | 0.52486 | -- | -- |
| 6 | 138001642 | rs182652574      | 3 | 0.9409   | 0.9606 | 0.9857 | --      | --      | --       | --      | 0.86566 | 0.95939  | 0.77381   | 0.53341 | 0.8169  | 2.0658   | 0.81302  | 0.46102 | --      | --      | --      | --      | 1.0326  | 0.69141  | 0.51885   | 0.48361 | -- | -- |
| 6 | 138001712 | rs76515784       | 5 | 0.3181   | 0.944  | 0.943  | 1.0161  | 0.27032 | 0.78948  | 0.86033 | 0.95073 | 0.11428  | 0.6399    | 0.92098 | 0.89777 | 0.19912  | 0.53712  | 0.95829 | 1.1127  | 0.22264 | 0.62648 | 0.89295 | 0.9236  | 0.077937 | 0.15167   | 0.94521 | -- | -- |
| 6 | 138001758 | rs4895496        | 5 | 0.2272   | 1.0941 | 0.089  | 0.92313 | 0.20346 | 0.61198  | 0.98904 | 1.149   | 0.09078  | 0.12533   | 0.98524 | 1.3819  | 0.13028  | 0.01655  | 0.99863 | 0.77135 | 0.17592 | 0.14324 | 0.98574 | 1.1125  | 0.064483 | 0.03198   | 0.9937  | -- | -- |
| 6 | 138001902 | rs542829         | 5 | 0.001991 | 0.9165 | 0.5951 | 1.0791  | 0.12636 | 0.35507  | 0.98913 | 0.92403 | 0.05557  | 0.16934   | 0.99551 | 0.8633  | 0.089072 | 0.11304  | 0.99768 | 0.98905 | 0.11349 | 0.95841 | 0.9921  | 0.90129 | 0.038675 | 0.11859   | 0.99503 | -- | -- |
| 6 | 138001987 | rs78377552       | 5 | 0.8697   | 1.0266 | 0.0358 | 0.98967 | 0.31445 | 0.90487  | 0.86983 | 0.90023 | 0.1632   | 0.46581   | 0.88953 | 0.6376  | 0.31536  | 0.092554 | 0.8761  | 1.0892  | 0.3956  | 0.77824 | 0.78349 | 1.4333  | 0.1057   | 0.0070494 | 0.90433 | -- | -- |
| 6 | 138002061 | rs77077620       | 5 | 0.2829   | 1.0732 | 0.0514 | 0.96468 | 0.15706 | 0.84108  | 0.92695 | 0.97872 | 0.066926 | 0.73641   | 0.98164 | 0.94587 | 0.12402  | 0.67153  | 0.9844  | 1.5179  | 0.1473  | 0.00628 | 0.97652 | 1.1165  | 0.049118 | 0.48257   | 0.98101 | -- | -- |
| 6 | 138002151 | rs189638730      | 4 | 0.8966   | 1.0345 | 0.6988 | 1.7657  | 1.6946  | 0.40939  | 0.52536 | 0.68633 | 0.64295  | 0.33903   | 0.57619 | 2.3193  | 0.84542  | 0.25408  | 0.68002 | --      | --      | --      | --      | 1.0032  | 0.30816  | 0.82077   | 0.72272 | -- | -- |
| 6 | 138002175 | rs6927172        | 5 | 0.6742   | 0.9858 | 0.8134 | 0.93831 | 0.16124 | 0.69745  | 0.98984 | 1.049   | 0.069916 | 0.44669   | 0.97957 | 0.91812 | 0.10061  | 0.45152  | 0.99315 | 0.9244  | 0.14789 | 0.60664 | 0.99481 | 0.98402 | 0.045896 | 0.66277   | 0.99127 | -- | -- |
| 6 | 138002192 | rs192427182      | 3 | 0.606    | 1.3928 | 0.7814 | --      | --      | --       | --      | 1.6368  | 0.91371  | 0.20661   | 0.42604 | 0.47639 | 1.6601   | 0.46076  | 0.62662 | --      | --      | --      | --      | 1.7481  | 1.0768   | 0.019683  | 0.52365 | -- | -- |
| 6 | 138002637 | rs10499194       | 5 | 0.1157   | 1.0501 | 0.5219 | 1.0036  | 1.13827 | 0.89767  | 0.98734 | 1.0057  | 0.060837 | 0.94478   | 0.98605 | 0.97148 | 0.10324  | 0.74386  | 0.98591 | 1.248   | 0.12755 | 0.09238 | 1       | 1.0705  | 0.04234  | 0.94793   | 0.9859  | -- | -- |
| 6 | 138002976 | rs184572962      | 5 | 0.2888   | 1.4285 | 0.553  | 1.6758  | 1.4384  | 0.76957  | 0.73203 | 0.50062 | 0.7626   | 0.24749   | 0.74113 | 0.9048  | 0.92592  | 0.92386  | 0.84316 | 0.99732 | 1.64    | 0.97172 | 0.6072  | 2.2073  | 0.44268  | 0.051068  | 0.86827 | -- | -- |
| 6 | 138002977 | rs189845960      | 5 | 0.3149   | 1.4046 | 0.7772 | 2.5738  | 4.3017  | 0.028635 | 0.53819 | 1.3017  | 0.60002  | 0.60311   | 0.85898 | 5.9588  | 1.4248   | 0.27751  | 0.78408 | 6.2095  | 2.0015  | 0.24967 | 0.68699 | 1.1794  | 0.43953  | 0.30879   | 0.87827 | -- | -- |
| 6 | 138002988 | rs112534948      | 5 | 0.7164   | 0.9619 | 0.9516 | 0.82302 | 0.48494 | 0.42459  | 0.70749 | 0.90866 | 0.18965  | 0.58425   | 0.93837 | 0.88564 | 0.34829  | 0.84087  | 0.7919  | 1.2406  | 0.40031 | 0.42434 | 0.69185 | 0.93939 | 0.15653  | 0.71559   | 0.74119 | -- | -- |
| 6 | 138003014 | rs141308353      | 3 | 0.7018   | 1.3058 | 0.9148 | 2.1293  | 2.0276  | 0.40111  | 0.71116 | --      | --       | --        | --      | --      | --       | --       | --      | 0.82819 | 1.3808  | 0.87473 | 0.68962 | 1.4329  | 0.88008  | 0.35069   | 0.50907 | -- | -- |
| 6 | 138003251 | rs145035369      | 5 | 0.878    | 0.9723 | 0.9286 | 0.90903 | 0.82678 | 0.62826  | 0.51803 | 0.94341 | 0.3292   | 0.76653   | 0.54908 | 1.0906  | 0.49956  | 0.58863  | 0.65293 | 1.4624  | 0.52864 | 0.24445 | 0.58576 | 0.85007 | 0.29486  | 0.41622   | 0.47844 | -- | -- |
| 6 | 138003605 | rs12665429       | 5 | 0.00326  | 1.0875 | 0.8754 | 0.97493 | 0.12788 | 0.66394  | 0.98864 | 1.0625  | 0.056288 | 0.29801   | 0.99433 | 1.1296  | 0.090663 | 0.18117  | 0.99731 | 1.0857  | 0.11591 | 0.52114 | 0.99174 | 1.1035  | 0.039044 | 0.17727   | 0.99949 | -- | -- |
| 6 | 138003822 | rs11757201       | 5 | 0.7166   | 0.9877 | 0.7971 | 0.94296 | 0.16119 | 0.71254  | 0.9894  | 1.0546  | 0.070301 | 0.4005    | 0.97418 | 0.91875 | 0.10066  | 0.45596  | 0.99317 | 0.92567 | 0.14793 | 0.61351 | 0.9952  | 0.98483 | 0.045936 |           |         |    |    |

|   |           |                  |   |          |        |        |         |         |          |         |         |          |          |         |         |          |          |          |         |         |         |         |         |          |          |         |
|---|-----------|------------------|---|----------|--------|--------|---------|---------|----------|---------|---------|----------|----------|---------|---------|----------|----------|----------|---------|---------|---------|---------|---------|----------|----------|---------|
| 6 | 138010497 | rs80156111       | 5 | 0.8323   | 0.952  | 0.8234 | 0.4092  | 0.93525 | 0.23433  | 0.59104 | 0.80429 | 0.39199  | 0.37263  | 0.65974 | 1.404   | 1.1131   | 0.71096  | 0.58156  | 0.83568 | 1.0441  | 0.72525 | 0.48682 | 1.1673  | 0.33029  | 0.46546  | 0.67745 |
| 6 | 138010889 | rs147095446      | 5 | 0.6728   | 0.9105 | 0.9629 | 1.064   | 1.7079  | 0.95854  | 0.47624 | 0.793   | 0.4461   | 0.48753  | 0.74769 | 0.78812 | 0.42993  | 0.59324  | 0.91604  | 1.7738  | 1.2906  | 0.43494 | 0.57691 | 1.0212  | 0.3353   | 0.99601  | 0.79649 |
| 6 | 138011104 | rs79351505       | 3 | 0.9812   | 0.9896 | 0.7082 | --      | --      | --       | --      | --      | 1.4402   | 0.70661  | 0.60945 | 0.85987 | --       | --       | --       | 1.4882  | 1.1858  | 0.64669 | 0.83281 | 0.69764 | 0.61029  | 0.52594  | 0.81734 |
| 6 | 138011151 | rs12525643       | 5 | 0.0783   | 1.0556 | 0.4694 | 1.0072  | 0.13756 | 0.93099  | 0.98806 | 1.0327  | 0.060326 | 0.60276  | 0.98161 | 0.92697 | 0.10048  | 0.4098   | 0.98825  | 1.2237  | 0.12588 | 0.1191  | 0.98942 | 1.0783  | 0.041964 | 0.73623  | 0.98743 |
| 6 | 138011256 | rs117926499      | 2 | 0.3747   | 0.4008 | 0.3717 | --      | --      | --       | --      | 0.70877 | 1.2119   | 0.74     | 0.66884 | --      | --       | --       | 0.090758 | 1.9559  | 0.28531 | 0.70511 | --      | --      | --       | --       | --      |
| 6 | 138011639 | rs149062787      | 5 | 0.6886   | 0.9047 | 0.0875 | 0.60858 | 0.69327 | 0.53814  | 0.82295 | 0.57384 | 0.29364  | 0.027013 | 0.83713 | 0.70386 | 0.45317  | 0.36982  | 0.89475  | 3.659   | 0.71664 | 0.02177 | 0.78177 | 1.124   | 0.18895  | 0.92313  | 0.85579 |
| 6 | 138011665 | rs602414         | 5 | 0.001978 | 0.9165 | 0.6296 | 1.0664  | 0.12656 | 0.39759  | 1       | 0.9212  | 0.055619 | 0.15137  | 0.99125 | 0.86713 | 0.088957 | 0.123661 | 0.1      | 0.99955 | 0.1138  | 0.9699  | 1       | 0.90182 | 0.038649 | 0.1207   | 1       |
| 6 | 138011689 | rs143056491      | 4 | 0.7188   | 1.2424 | 0.9767 | --      | --      | --       | --      | 0.93574 | 0.88207  | 0.90516  | 0.70151 | 1.9267  | 0.20652  | 0.69591  | 0.71298  | 1.6483  | 1.9243  | 0.53366 | 0.41531 | 1.5062  | 1.0196   | 0.10624  | 0.62855 |
| 6 | 138012015 | rs118175825      | 2 | 0.3752   | 0.4008 | 0.3738 | --      | --      | --       | --      | 0.7073  | 1.2128   | 0.73749  | 0.66743 | --      | --       | --       | 0.09123  | 1.9577  | 0.28759 | 0.70814 | --      | --      | --       | --       | --      |
| 6 | 138012035 | rs74648690       | 5 | 0.7375   | 0.9667 | 0.9508 | 0.82804 | 0.48641 | 0.43397  | 0.71123 | 0.90568 | 0.18963  | 0.57342  | 0.94088 | 0.88748 | 0.34858  | 0.84525  | 0.79267  | 1.2326  | 0.39805 | 0.44046 | 0.69971 | 1.0021  | 0.15691  | 0.66651  | 0.74261 |
| 6 | 138012148 | rs117565759      | 5 | 0.3707   | 0.8647 | 0.4339 | 0.75533 | 0.71176 | 0.43688  | 0.78728 | 1.1283  | 0.26218  | 0.60586  | 0.9117  | 1.3685  | 0.35964  | 0.40442  | 0.94816  | 0.92443 | 0.96003 | 0.90571 | 0.73582 | 0.71209 | 0.18241  | 0.27411  | 0.92525 |
| 6 | 138012778 | rs142647208      | 3 | 0.6814   | 0.712  | 0.9063 | --      | --      | --       | --      | 0.7198  | 1.2099   | 0.71841  | 0.61492 | --      | --       | --       | 0.38974  | 1.7535  | 0.36214 | 0.50517 | 1.0801  | 1.4869  | 0.78508  | 0.3075   | --      |
| 6 | 138012824 | rs77102949       | 5 | 0.9365   | 0.9901 | 0.2517 | 1.3749  | 0.41081 | 0.31336  | 0.78063 | 1.2348  | 0.1854   | 0.17026  | 0.86556 | 0.57844 | 0.31967  | 0.033686 | 0.97186  | 1.1437  | 0.41819 | 0.69541 | 0.87948 | 0.91595 | 1.12809  | 0.39762  | 0.86111 |
| 6 | 138012970 | rs601705         | 5 | 0.001789 | 0.9157 | 0.5717 | 1.0888  | 0.12633 | 0.31658  | 0.99355 | 0.91922 | 0.055736 | 0.14176  | 0.98931 | 0.86407 | 0.089095 | 0.1147   | 0.99725  | 0.98725 | 0.11349 | 0.94571 | 0.99285 | 0.90119 | 0.038686 | 0.11662  | 0.99447 |
| 6 | 138013232 | rs149591153      | 2 | 0.376    | 0.4008 | 0.3779 | --      | --      | --       | --      | 0.70407 | 1.2146   | 0.73299  | 0.66629 | --      | --       | --       | 0.09195  | 1.9632  | 0.29524 | 0.71945 | --      | --      | --       | --       | --      |
| 6 | 138013244 | chr6:138013244:D | 5 | 0.2312   | 1.0934 | 0.0884 | 0.91751 | 0.20304 | 0.59313  | 0.99213 | 1.1481  | 0.090943 | 0.12735  | 0.9825  | 1.3816  | 0.13033  | 0.016624 | 0.99821  | 0.7725  | 0.17579 | 0.14571 | 0.98696 | 1.1135  | 0.064592 | 0.030908 | 0.99078 |
| 6 | 138013247 | chr6:138013247:D | 5 | 0.1679   | 1.1081 | 0.2292 | 0.89719 | 0.25876 | 0.61638  | 0.88405 | 1.0819  | 0.11133  | 0.44628  | 0.88939 | 1.5245  | 0.16846  | 0.008832 | 0.9133   | 0.86986 | 0.2104  | 0.41916 | 0.84635 | 1.1058  | 0.078652 | 0.086574 | 0.89751 |
| 6 | 138013384 | rs140813969      | 5 | 0.7087   | 1.0718 | 0.9254 | 1.0984  | 0.82982 | 0.55205  | 0.54865 | 1.296   | 0.309    | 0.31918  | 0.86849 | 0.86496 | 0.69104  | 0.8489   | 0.60017  | 1.6568  | 1.0306  | 0.22007 | 0.43824 | 0.93541 | 0.26525  | 0.71188  | 0.59297 |
| 6 | 138013551 | rs694069         | 5 | 0.001883 | 0.916  | 0.5739 | 1.0866  | 0.12645 | 0.32525  | 0.99195 | 0.9214  | 0.055699 | 0.15294  | 0.9891  | 0.86414 | 0.089104 | 0.11502  | 0.99678  | 0.98893 | 0.11345 | 0.95619 | 0.99167 | 0.90085 | 0.038703 | 0.11544  | 0.99364 |
| 6 | 138013656 | rs145622748      | 2 | 0.3762   | 0.4006 | 0.3801 | --      | --      | --       | --      | 0.70226 | 1.2156   | 0.73044  | 0.66571 | --      | --       | --       | 0.09244  | 1.9648  | 0.29765 | 0.72276 | --      | --      | --       | --       | --      |
| 6 | 138013665 | rs508214         | 5 | 0.001967 | 0.9163 | 0.5616 | 1.0901  | 0.12638 | 0.31217  | 0.99218 | 0.92072 | 0.05576  | 0.14878  | 0.98765 | 0.86422 | 0.089124 | 0.11504  | 0.99659  | 0.99026 | 0.11349 | 0.96538 | 0.99224 | 0.90128 | 0.038712 | 0.11833  | 0.99317 |
| 6 | 138014057 | rs188624024      | 3 | 0.5398   | 0.7404 | 0.9055 | --      | --      | --       | --      | 0.63054 | 1.1094   | 0.54259  | 0.67081 | 1.4536  | 1.6249   | 0.77882  | 0.55133  | --      | --      | --      | 0.70995 | 0.58008 | 0.27576  | 0.46003  |         |
| 6 | 138014433 | rs9399224        | 5 | 0.0191   | 0.9278 | 0.3438 | 1.1315  | 0.12756 | 0.1861   | 0.99141 | 0.88802 | 0.056188 | 0.03155  | 0.98748 | 0.93258 | 0.089865 | 0.39192  | 0.9963   | 1.0485  | 0.11252 | 0.68795 | 0.99163 | 0.90817 | 0.039124 | 0.049924 | 0.99261 |
| 6 | 138014911 | rs812845         | 5 | 0.01928  | 0.9285 | 0.349  | 1.1348  | 0.12771 | 0.18644  | 0.99034 | 0.89193 | 0.056293 | 0.037859 | 0.98536 | 0.92893 | 0.088983 | 0.36783  | 0.99625  | 1.0491  | 0.11258 | 0.68431 | 0.99014 | 0.90847 | 0.039097 | 0.052876 | 0.99262 |
| 6 | 138015028 | rs78933665       | 3 | 0.7978   | 1.1216 | 0.6758 | --      | --      | --       | --      | 1.5565  | 0.74368  | 0.50609  | 0.82636 | --      | --       | --       | 1.9567   | 1.2117  | 0.47709 | 0.86454 | 0.75958 | 0.63349 | 0.59777  | 0.7768   |         |
| 6 | 138015288 | rs58652312       | 2 | 0.485    | 0.4396 | 0.9284 | --      | --      | --       | --      | 0.38397 | 1.9097   | 0.14326  | 0.31371 | --      | --       | --       | --       | --      | --      | --      | 0.47752 | 1.4947  | 0.51704  | 0.53152  |         |
| 6 | 138015360 | rs190849118      | 4 | 0.6761   | 0.8716 | 0.9938 | 1.157   | 1.4835  | 0.97912  | 0.51092 | 0.75246 | 1.1028   | 0.48877  | 0.38399 | 1.0119  | 0.96125  | 0.76306  | 0.63846  | --      | --      | --      | 0.85034 | 0.38127 | 0.9421   | 0.70951  |         |
| 6 | 138015376 | rs76198372       | 5 | 0.7284   | 0.9747 | 0.8316 | 0.9606  | 0.40759 | 0.98591  | 0.84068 | 1.1234  | 0.15551  | 0.37744  | 0.90425 | 0.91919 | 0.20394  | 0.79435  | 0.92853  | 0.74502 | 0.38283 | 0.37897 | 0.85112 | 0.95138 | 0.097555 | 0.41328  | 0.92888 |
| 6 | 138015468 | rs76805680       | 4 | 0.279    | 0.6356 | 0.6597 | 1.1733  | 2.25    | 0.79545  | 0.37547 | 1.1575  | 0.84905  | 0.70196  | 0.49373 | 0.24283 | 0.95184  | 0.103784 | 0.65236  | --      | --      | --      | 0.65903 | 0.57573 | 0.095521 | 0.51475  |         |
| 6 | 138015940 | rs141292820      | 5 | 0.8389   | 1.0491 | 0.9817 | 1.5821  | 1.2967  | 0.38553  | 0.48765 | 1.1234  | 0.47578  | 0.77969  | 0.53395 | 1.1406  | 0.66641  | 0.85335  | 0.75777  | 0.62589 | 0.99922 | 0.39855 | 0.50307 | 1.0259  | 0.32011  | 0.92535  | 0.65003 |
| 6 | 138015941 | rs150767164      | 5 | 0.8389   | 1.0491 | 0.9817 | 1.5821  | 1.2967  | 0.38553  | 0.48765 | 1.1234  | 0.47578  | 0.77969  | 0.53395 | 1.1406  | 0.66641  | 0.85335  | 0.75777  | 0.62589 | 0.99922 | 0.39855 | 0.50307 | 1.0259  | 0.32011  | 0.92535  | 0.65003 |
| 6 | 138016125 | rs667520         | 5 | 0.01649  | 0.9277 | 0.3563 | 1.1358  | 0.1277  | 0.18238  | 0.99129 | 0.89097 | 0.065188 | 0.036495 | 0.98885 | 0.92927 | 0.088633 | 0.37028  | 0.99653  | 1.0439  | 0.11259 | 0.71366 | 1       | 0.90896 | 0.039101 | 0.05511  | 0.99311 |
| 6 | 138016293 | rs59278011       | 4 | 0.5394   | 1.3937 | 0.9424 | --      | --      | --       | --      | 1.9035  | 1.2142   | 0.30312  | 0.46198 | 1.4249  | 1.1821   | 0.74859  | 0.76543  | 2.014   | 1.1267  | 0.43477 | 0.79619 | 0.91743 | 0.89904  | 0.48135  | 0.45381 |
| 6 | 138016301 | rs147461362      | 5 | 0.8227   | 1.075  | 0.9352 | 1.1577  | 1.1779  | 0.86938  | 0.65265 | 1.1238  | 0.78236  | 0.82462  | 0.62226 | 2.3467  | 0.96306  | 0.35066  | 0.78754  | 0.81794 | 1.3726  | 0.71181 | 0.37767 | 0.92908 | 0.42114  | 0.87469  | 0.82876 |
| 6 | 138016521 | rs111918781      | 3 | 0.756    | 1.1429 | 0.8041 | --      | --      | --       | --      | 1.5108  | 0.74348  | 0.52034  | 0.79088 | --      | --       | --       | 1.6281   | 1.168   | 0.49302 | 0.69971 | 0.8757  | 0.59032 | 0.69252  | 0.67852  |         |
| 6 | 138016809 | rs112529622      | 3 | 0.8334   | 1.0839 | 0.7137 | --      | --      | --       | --      | 1.3681  | 0.6768   | 0.46727  | 0.64485 | 3.1438  | 1.7244   | 0.2691   | 0.40485  | --      | --      | --      | 0.88597 | 0.48236 | 0.79059  | 0.54266  |         |
| 6 | 138016897 | rs113335884      | 5 | 0.8988   | 0.9813 | 0.9047 | 1.5521  | 0.66752 | 0.12895  | 0.79344 | 0.97757 | 0.27059  | 0.93589  | 0.86291 | 1.2103  | 0.39244  | 0.49802  | 0.90529  | 1.0309  | 0.83919 | 0.98582 | 0.75878 | 0.87642 | 0.21652  | 0.80415  | 0.80584 |
| 6 | 138017109 | rs589035         | 5 | 0.523    | 1.1664 | 0.0045 | 4.6438  | 0.55704 | 0.026697 | 0.93716 | 0.78641 | 0.19906  | 0.21197  | 0.95995 | 0.66584 | 0.34678  | 0.30963  | 0.98875  | 2.3169  | 0.40065 | 0.0418  | 0.94583 | 0.90845 | 0.13873  | 0.38618  | 0.97279 |
| 6 | 138017298 | rs6911600        | 4 | 0.6588   | 1.0447 | 0.6008 | 1.0848  | 0.46257 | 0.52308  | 0.47676 | 1.1353  | 0.17714  | 0.19154  | 0.56169 | 1.3448  | 0.27019  | 0.048045 | 0.59163  | --      | --      | --      | 0.92496 | 1.1392  | 0.2943   | 0.53602  |         |
| 6 | 138017299 | rs549786         | 5 | 0.566    | 1.1412 | 0.0087 | 4.3709  | 0.55922 | 0.028883 | 0.92571 | 0.80455 | 0.20016  | 0.2595   | 0.95777 | 0.66812 | 0.34789  | 0.31219  | 0.98478  | 2.2182  | 0.40756 | 0.05625 | 0.94213 | 0.90718 | 0.1386   | 0.3815   | 0.97466 |
| 6 | 138017341 | rs140301921      | 4 | 0.6384   | 0.9108 | 0.8857 | 0.42266 | 1.0543  | 0.33261  | 0.45357 | 0.89762 | 0.46145  | 0.65433  | 0.49002 | 0.81909 | 0.5422   | 0.50437  | 0.47865  | --      | --      | --      | 0.9756  | 0.24765 | 0.41393  | 0.4904   |         |
| 6 | 138017430 | rs144025497      | 5 | 0.8191   | 1.0766 | 0.9357 | 1.158   | 1.178   | 0.86917  | 0.65269 | 1.1228  | 0.78207  | 0.82587  | 0.62201 | 2.3473  | 0.96298  | 0.35049  | 0.78738  | 0.81734 | 1.3725  | 0.71111 | 0.37797 | 0.93157 | 0.42124  | 0.87823  | 0.82856 |
| 6 | 138017690 | rs150087195      | 2 | 0.4169   | 0.4306 | 0.4414 | --      | --      | --       | --      | 0.70397 | 1.218    |          |         |         |          |          |          |         |         |         |         |         |          |          |         |

|   |           |                  |   |         |        |        |         |         |          |         |          |          |          |         |         |          |          |         |          |         |         |         |         |          |          |         |         |
|---|-----------|------------------|---|---------|--------|--------|---------|---------|----------|---------|----------|----------|----------|---------|---------|----------|----------|---------|----------|---------|---------|---------|---------|----------|----------|---------|---------|
| 6 | 138023094 | rs75768498       | 4 | 0.7677  | 1.143  | 0.3589 | 0.12336 | 1.3473  | 0.27092  | 0.54952 | 1.3184   | 1.1041   | 0.56959  | 0.43596 | --      | --       | --       | --      | 1.0748   | 1.6852  | 0.95749 | 0.41853 | 1.5976  | 0.47852  | 0.48341  | 0.61726 |         |
| 6 | 138023242 | rs609438         | 5 | 0.2371  | 0.967  | 0.6767 | 1.0843  | 0.12836 | 0.33035  | 0.94702 | 0.9274   | 0.505995 | 0.15353  | 0.97565 | 1.0479  | 0.087342 | 0.57783  | 0.95992 | 0.99467  | 0.11404 | 0.96652 | 0.95046 | 0.95761 | 0.031984 | 0.64386  | 0.95294 |         |
| 6 | 138023271 | rs149583311      | 5 | 0.724   | 0.9245 | 0.9644 | 0.74468 | 1.6958  | 0.77475  | 0.526   | 0.82665  | 0.45038  | 0.58535  | 0.77665 | 0.80165 | 0.42815  | 0.63211  | 0.92589 | 1.8499   | 1.1682  | 0.49342 | 0.68727 | 1.033   | 0.33546  | 0.96038  | 0.81536 |         |
| 6 | 138023348 | rs540085         | 5 | 0.1299  | 0.9575 | 0.6427 | 1.078   | 0.12798 | 0.33104  | 0.91621 | 0.92616  | 0.057096 | 0.14517  | 0.94668 | 1.0355  | 0.088686 | 0.69102  | 0.95358 | 1.023    | 0.11692 | 0.85736 | 0.92798 | 0.94033 | 0.039209 | 0.24773  | 0.948   |         |
| 6 | 138023549 | rs597846         | 5 | 0.3509  | 1.0477 | 0.1965 | 1.2548  | 0.16941 | 0.073999 | 0.88367 | 1.0274   | 0.069461 | 0.71719  | 1       | 1.1382  | 0.10198  | 0.19569  | 0.94062 | 0.77168  | 0.15133 | 0.058   | 0.91722 | 1.0637  | 0.05053  | 0.22231  | 0.92659 |         |
| 6 | 138023550 | rs117895663      | 2 | 0.2678  | 0.3052 | 0.3968 | --      | --      | --       | --      | 0.54288  | 1.2685   | --       | 0.73492 | --      | --       | --       | --      | 0.073035 | 1.9986  | 0.34926 | 0.83417 | --      | --       | --       | --      |         |
| 6 | 138023604 | rs632020         | 5 | 0.4849  | 0.9572 | 0.2284 | 1.2232  | 0.2178  | 0.21806  | 0.80689 | 0.90243  | 0.094124 | 0.17094  | 0.85828 | 0.97372 | 0.1449   | 0.83961  | 0.85627 | 0.70555  | 0.17825 | 0.0544  | 1       | 1.0245  | 0.064432 | 0.64517  | 0.85456 |         |
| 6 | 138023639 | rs141582774      | 5 | 0.8708  | 0.9791 | 0.872  | 1.3015  | 0.58063 | 0.548    | 0.70611 | 0.95787  | 0.26305  | 0.84181  | 0.71162 | 1.2621  | 0.32126  | 0.39966  | 0.80966 | 0.7672   | 0.53963 | 0.45331 | 0.63285 | 0.90852 | 0.18655  | 0.52927  | 0.71288 |         |
| 6 | 138023763 | rs77640881       | 3 | 0.6528  | 1.2892 | 0.9716 | --      | --      | --       | --      | 1.4819   | 0.81126  | 0.48092  | 0.64537 | --      | --       | --       | --      | 1.1104   | 1.1911  | 0.86418 | 0.47016 | 1.1473  | 1.0465   | 0.56195  | 0.30684 |         |
| 6 | 138023796 | chr6:138023796:D | 2 | 0.2883  | 0.2898 | 0.28   | --      | --      | --       | --      | 0.63291  | 1.2309   | 0.62787  | 0.65385 | --      | --       | --       | --      | 0.050777 | 1.9844  | 0.31691 | 0.80964 | --      | --       | --       | --      |         |
| 6 | 138023808 | rs185112537      | 2 | 0.2881  | 0.2897 | 0.28   | --      | --      | --       | --      | 0.63268  | 1.2309   | 0.62745  | 0.65371 | --      | --       | --       | --      | 0.050777 | 1.9844  | 0.31691 | 0.80964 | --      | --       | --       | --      |         |
| 6 | 138023833 | rs190345124      | 3 | 0.296   | 0.6038 | 0.9125 | --      | --      | --       | --      | 0.56445  | 0.74008  | 0.26799  | 0.66302 | 0.25572 | 2.3036   | 0.030877 | 0.39298 | --       | --      | --      | --      | 0.6843  | 0.66265  | 0.59175  | 0.49951 |         |
| 6 | 138023858 | rs116900064      | 3 | 0.8139  | 1.0911 | 0.5289 | --      | --      | --       | --      | 1.394    | 0.65268  | 0.46378  | 0.70449 | 5.2234  | 1.6904   | 0.22616  | 0.45713 | --       | --      | --      | --      | 0.85415 | 0.46692  | 0.8879   | 0.58334 |         |
| 6 | 138023963 | rs139756789      | 5 | 0.9235  | 1.0304 | 0.9115 | 1.2461  | 1.2347  | 0.78872  | 0.62242 | 1.1767   | 0.7865   | 0.72608  | 0.5713  | 2.2786  | 0.97576  | 0.35693  | 0.76891 | 1.1792   | 1.1541  | 0.73566 | 0.45666 | 0.83949 | 0.40102  | 0.66702  | 0.78079 |         |
| 6 | 138024039 | rs72976896       | 5 | 0.629   | 1.0641 | 0.8659 | 0.67783 | 0.51716 | 0.5081   | 0.89797 | 1.1762   | 0.27414  | 0.50428  | 0.8378  | 1.3504  | 0.40508  | 0.42391  | 0.91061 | 1.0447   | 0.3768  | 0.91892 | 0.95235 | 1.0306  | 0.18173  | 0.548    | 0.88863 |         |
| 6 | 138024101 | rs114111951      | 4 | 0.4479  | 0.5319 | 0.6789 | 0.24074 | 1.7321  | 0.36159  | 0.74068 | 2.3976   | 1.5217   | 0.36122  | 0.58208 | 0.16921 | 2.1437   | 0.17382  | 0.69299 | --       | --      | --      | --      | 0.39544 | 1.4714   | 0.41591  | 0.45269 |         |
| 6 | 138024155 | rs144444629      | 2 | 0.7413  | 1.2887 | 0.6865 | --      | --      | --       | --      | 1.6386   | 0.97181  | 0.49886  | 0.66325 | --      | --       | --       | --      | --       | --      | --      | --      | 0.86362 | 1.2543   | 0.66979  | 0.31255 |         |
| 6 | 138024189 | rs146118229      | 4 | 0.5216  | 1.3403 | 0.9728 | --      | --      | --       | --      | 2.1862   | 1.6574   | 0.31724  | 0.39479 | 1.8567  | 1.1084   | 0.654    | 0.8102  | 1.1563   | 1.0516  | 0.86015 | 0.70754 | 1.1953  | 0.60803  | 0.40409  | 0.63247 |         |
| 6 | 138024418 | rs149683367      | 2 | 0.2122  | 0.4923 | 0.7144 | --      | --      | --       | --      | --       | --       | --       | 0.79994 | 1.443   | 0.82639  | 0.77996  | --      | --       | --      | --      | 0.45042 | 0.61782 | 0.1722   | 0.62379  | --      |         |
| 6 | 138024613 | rs117476137      | 5 | 0.4935  | 0.8593 | 0.265  | 0.69189 | 0.81866 | 0.42477  | 0.83735 | 1.1631   | 0.33488  | 0.61145  | 0.88828 | 1.5918  | 0.47896  | 0.27861  | 0.8711  | 0.43004  | 1.7744  | 0.47961 | 0.605   | 0.59771 | 0.21979  | 0.080499 | 0.89333 |         |
| 6 | 138024818 | chr6:138024818:D | 2 | 0.8227  | 0.889  | 0.3389 | 0.50954 | 0.78394 | 0.043382 | 0.36837 | --       | --       | --       | --      | 1.399   | 0.7076   | 0.29114  | 0.33961 | --       | --      | --      | --      | --      | --       | --       | --      |         |
| 6 | 138024863 | chr6:138024863:D | 4 | 0.7824  | 0.8574 | 0.9135 | 0.75651 | 1.5338  | 0.49187  | 0.39795 | 0.59103  | 0.83857  | 0.18383  | 0.48774 | 2.0926  | 1.9186   | 0.56462  | 0.54425 | --       | --      | --      | --      | 1.1666  | 0.95178  | 0.13474  | 0.4103  |         |
| 6 | 138024879 | chr6:138024879:D | 3 | 0.3988  | 0.6646 | 0.7135 | 0.28265 | 1.1801  | 0.21561  | 0.54821 | 0.69128  | 0.82977  | 0.29732  | 0.42612 | --      | --       | --       | --      | --       | --      | --      | --      | 0.86701 | 0.6909   | 0.2718   | 0.30405 |         |
| 6 | 138024940 | chr6:138024940:D | 4 | 0.9981  | 1.0008 | 0.9241 | 2.298   | 2.0165  | 0.16993  | 0.35521 | --       | --       | --       | --      | 0.78642 | 0.55577  | 0.43482  | 0.79938 | 1.479    | 1.246   | 0.57994 | 0.58122 | 1.0635  | 0.43285  | 0.52576  | 0.46306 |         |
| 6 | 138025067 | rs78015284       | 3 | 0.7321  | 1.1139 | 0.9368 | --      | --      | --       | --      | 0.98187  | 0.55883  | 0.92866  | 0.33149 | 1.014   | 0.74956  | 0.85909  | 0.42996 | --       | --      | --      | --      | 1.2458  | 0.44279  | 0.064708 | 0.31269 |         |
| 6 | 138025200 | rs77539759       | 5 | 0.08731 | 0.9497 | 0.8084 | 0.86486 | 0.13698 | 0.23993  | 0.91043 | 0.906865 | 0.058653 | 0.11309  | 1       | 0.95594 | 0.090719 | 0.61699  | 0.9734  | 0.99443  | 0.13041 | 0.98578 | 0.96736 | 0.97471 | 0.041808 | 0.94155  | 0.96271 |         |
| 6 | 138025352 | chr6:138025352:D | 5 | 0.2867  | 0.9181 | 0.0718 | 0.93037 | 0.2084  | 0.60612  | 0.84668 | 0.90338  | 0.086947 | 0.24103  | 0.94467 | 1.1726  | 0.1517   | 0.26822  | 0.93872 | 0.58086  | 0.19532 | 0.00273 | 0.92805 | 0.96754 | 0.064738 | 0.64001  | 0.92915 |         |
| 6 | 138025552 | rs585985         | 5 | 0.286   | 0.9181 | 0.0722 | 0.92604 | 0.20754 | 0.5457   | 0.86424 | 0.90353  | 0.087374 | 0.24296  | 0.94823 | 1.1722  | 0.14978  | 0.26657  | 0.92881 | 0.5802   | 0.19642 | 0.00366 | 0.94902 | 0.96619 | 0.064756 | 0.66366  | 0.93127 |         |
| 6 | 138025947 | rs113799770      | 2 | 0.8557  | 1.2022 | 0.5673 | 0.42784 | 2.0706  | 0.39672  | 0.59213 | 1.6634   | 1.1608   | 0.4254   | 0.53958 | --      | --       | --       | --      | --       | --      | --      | --      | --      | --       | --       | --      |         |
| 6 | 138026171 | rs113441896      | 3 | 0.8941  | 1.0607 | 0.8287 | --      | --      | --       | --      | 1.0574   | 0.74041  | 0.9591   | 0.78428 | --      | --       | --       | --      | --       | 2.2073  | 1.3143  | 0.3881  | 0.79818 | 0.90813  | 0.60918  | 0.93707 | 0.83876 |
| 6 | 138026186 | rs141000276      | 4 | 0.9027  | 1.0253 | 0.3283 | 1.4884  | 0.95441 | 0.66385  | 0.68525 | 0.76082  | 0.35484  | 0.30385  | 0.74134 | 0.57391 | 0.52605  | 0.1303   | 0.78303 | --       | --      | --      | --      | 1.3464  | 0.22991  | 0.13292  | 0.74666 |         |
| 6 | 138026230 | rs149363208      | 5 | 0.5707  | 1.1225 | 0.1874 | 1.3663  | 0.97533 | 0.59984  | 0.78846 | 1.8273   | 0.29509  | 0.034416 | 0.92602 | 0.58365 | 0.38043  | 0.075107 | 0.91161 | 0.79732  | 0.54943 | 0.69007 | 0.9505  | 1.2025  | 0.19966  | 0.1782   | 0.9035  |         |
| 6 | 138026272 | rs8180657        | 5 | 0.01693 | 0.9232 | 0.3466 | 0.90845 | 0.13626 | 0.59356  | 0.90919 | 0.87145  | 0.059333 | 0.019696 | 0.98419 | 1.0295  | 0.093214 | 0.72903  | 1       | 1.1004   | 0.12536 | 0.42792 | 0.94835 | 0.90677 | 0.040604 | 0.044891 | 1       |         |
| 6 | 138026354 | rs8180663        | 5 | 0.00853 | 0.9211 | 0.3842 | 0.90744 | 0.1362  | 0.58815  | 0.9098  | 0.87165  | 0.05931  | 0.019934 | 0.98478 | 1.0192  | 0.093558 | 0.80676  | 1       | 1.1004   | 0.12531 | 0.42792 | 0.94903 | 0.9091  | 0.04068  | 0.055363 | 1       |         |
| 6 | 138026452 | chr6:138026452:D | 2 | 0.3122  | 0.2371 | 0.2014 | --      | --      | --       | --      | 0.69469  | 1.2188   | 0.64168  | 0.55112 | --      | --       | --       | --      | 0.035923 | 1.9723  | 0.29428 | 0.7892  | --      | --       | --       | --      |         |
| 6 | 138027115 | rs4432993        | 5 | 0.02859 | 0.927  | 0.3258 | 0.91416 | 0.13622 | 0.65797  | 0.91336 | 0.87158  | 0.059004 | 0.021061 | 1       | 1.0349  | 0.093226 | 0.68346  | 0.99506 | 1.1046   | 0.12507 | 0.41547 | 0.95226 | 0.90967 | 0.040729 | 0.040626 | 0.98978 |         |
| 6 | 138027123 | rs192640294      | 2 | 0.6798  | 0.9627 | 0.2445 | --      | --      | --       | --      | 1.6825   | 1.4388   | 0.38624  | 0.4137  | --      | --       | --       | --      | 0.095097 | 2.0603  | 0.35801 | 0.80534 | --      | --       | --       | --      |         |
| 6 | 138027145 | rs2048687        | 5 | 0.1042  | 0.9522 | 0.8229 | 0.88549 | 0.13566 | 0.33087  | 0.93497 | 0.90564  | 0.058491 | 0.10048  | 0.99053 | 0.96051 | 0.090241 | 0.65432  | 0.98446 | 0.98495  | 0.12891 | 0.93164 | 1       | 0.97841 | 0.041815 | 0.94392  | 0.9738  |         |
| 6 | 138027153 | rs76263639       | 2 | 0.6463  | 0.5837 | 0.5657 | 0.24471 | 1.9149  | 0.33887  | 0.61654 | 0.98399  | 1.4841   | 0.97794  | 0.44666 | --      | --       | --       | --      | --       | --      | --      | --      | --      | --       | --       | --      |         |
| 6 | 138027229 | rs472391         | 5 | 0.6203  | 1.0253 | 0.1413 | 1.126   | 0.14936 | 0.49505  | 1       | 1.0662   | 0.066204 | 0.3583   | 1       | 1.1342  | 0.096902 | 0.20722  | 1       | 0.75388  | 0.13749 | 0.0354  | 1       | 1.0125  | 0.046673 | 0.70962  | 1       |         |
| 6 | 138027492 | rs77924670       | 5 | 0.5914  | 0.9517 | 0.7419 | 1.1352  | 0.46248 | 0.44404  | 0.66456 | 0.86371  | 0.18287  | 0.24309  | 0.70256 | 1.0784  | 0.24929  | 0.54325  | 0.7732  | 0.58981  | 0.43973 | 0.07794 | 0.55921 | 0.99166 | 0.1272   | 0.74059  | 0.70451 |         |
| 6 | 138027662 | rs6901613        | 5 | 0.09865 | 0.9515 | 0.8542 | 0.88317 | 0.1354  | 0.31086  | 0.93561 | 0.91023  | 0.058412 | 0.12061  | 1       | 0.95521 | 0.09018  | 0.60874  | 0.98293 | 0.99715  | 0.12971 | 0.99105 | 0.98481 | 0.97467 | 0.041838 | 0.88701  | 0.9729  |         |
| 6 | 138027772 | rs477721         | 5 | 0.3141  | 0.9203 | 0.0593 | 0.95307 | 0.20775 | 0.68223  | 0.87024 | 0.90565  | 0.087611 | 0.26722  | 0.97413 | 1.1799  | 0.15015  | 0.26106  | 0.96084 | 0.57778  | 0.1926  | 0.00347 | 1       | 0.96871 | 0.065545 | 0.69449  | 0.94465 |         |
| 6 | 138027779 | rs189030603      | 4 | 0.3983  | 1.6184 | 0.7969 | 6.4903  | 1.7418  | 0.48748  | 0.65981 | 1.0776   | 0.7777   | 0.94929  | 0.89688 | --      | --       | --       | --      | 2.3436   | 1.17    | 0.44335 | 0.97    |         |          |          |         |         |

|   |           |                  |   |           |        |        |         |         |          |         |         |          |          |         |          |          |          |         |          |         |         |         |         |          |           |         |
|---|-----------|------------------|---|-----------|--------|--------|---------|---------|----------|---------|---------|----------|----------|---------|----------|----------|----------|---------|----------|---------|---------|---------|---------|----------|-----------|---------|
| 6 | 138033878 | rs188607765      | 4 | 0.6603    | 0.8318 | 0.9482 | 0.66444 | 1.5758  | 0.72241  | 0.58837 | 1.0496  | 0.62755  | 0.96733  | 0.58173 | 0.86698  | 0.89807  | 0.8512   | 0.76866 | --       | --      | --      | --      | 0.57783 | 0.81289  | 0.18467   | 0.34241 |
| 6 | 138033990 | rs59051843       | 4 | 0.5047    | 0.586  | 0.9205 | 0.81473 | 1.5318  | 0.52368  | 0.55886 | 0.8309  | 1.646    | 0.69785  | 0.37783 | 0.15839  | 2.0708   | 0.1877   | 0.71218 | --       | --      | --      | --      | 0.62682 | 1.3749   | 0.67925   | 0.4124  |
| 6 | 138034018 | rs147154260      | 3 | 0.7966    | 1.2285 | 0.2191 | 0.59699 | 1.6311  | 0.75722  | 0.56169 | 5.5775  | 1.0954   | 0.014532 | 0.5232  | --       | --       | --       | --      | --       | --      | --      | --      | 0.54775 | 0.8296   | 0.18265   | 0.56983 |
| 6 | 138034294 | rs498361         | 5 | 0.08241   | 0.9337 | 0.214  | 0.86538 | 0.12973 | 0.397    | 0.92012 | 0.90982 | 0.057096 | 0.095857 | 0.99094 | 0.99153  | 0.089909 | 0.90142  | 0.99298 | 1.177    | 0.11882 | 0.17942 | 0.95402 | 0.89336 | 0.039443 | 0.0029468 | 0.9912  |
| 6 | 138034435 | rs67841347       | 5 | 0.3152    | 0.9571 | 0.497  | 1.2342  | 0.19429 | 0.22414  | 0.94042 | 0.94532 | 0.068985 | 0.44988  | 0.98536 | 1.0163   | 0.12934  | 0.85715  | 0.98968 | 0.7783   | 0.17384 | 0.14482 | 0.97816 | 0.95059 | 0.060586 | 0.28729   | 0.9801  |
| 6 | 138034420 | rs111834596      | 4 | 0.8362    | 0.9248 | 0.971  | --      | --      | --       | --      | 0.80944 | 0.64041  | 0.60829  | 0.63428 | 0.54619  | 1.5498   | 0.51119  | 0.64311 | 1.158    | 1.088   | 0.82095 | 0.79454 | 1.0296  | 0.55045  | 0.98982   | 0.63661 |
| 6 | 138034643 | rs501907         | 5 | 0.0004037 | 0.9068 | 0.4999 | 0.95175 | 0.12408 | 0.87092  | 0.92345 | 0.89318 | 0.055107 | 0.03393  | 1       | 0.98497  | 0.085418 | 0.86076  | 1       | 1.048    | 0.1148  | 0.69029 | 0.95738 | 0.88054 | 0.037824 | 0.0003629 | 1       |
| 6 | 138034791 | rs66888754       | 5 | 0.3885    | 0.9204 | 0.496  | 0.68576 | 0.39147 | 0.22927  | 0.85699 | 1.0285  | 0.19217  | 0.90367  | 0.92906 | 1.3486   | 0.29398  | 0.30247  | 0.92654 | 1.004    | 0.33583 | 0.9919  | 0.92601 | 0.81965 | 0.13593  | 0.4275    | 0.915   |
| 6 | 138034805 | rs80173737       | 4 | 0.855     | 0.928  | 0.7885 | --      | --      | --       | --      | 0.97785 | 0.75583  | 0.91526  | 0.62699 | 0.15222  | 2.1543   | 0.093155 | 0.61302 | 2.1083   | 1.9072  | 0.37186 | 0.70429 | 0.89759 | 0.5343   | 0.65215   | 0.67484 |
| 6 | 138034996 | rs73560247       | 3 | 0.8355    | 1.2207 | 0.9351 | 2.135   | 1.8214  | 0.50188  | 0.79009 | 1.0318  | 1.3705   | 0.97269  | 0.56494 | --       | --       | --       | --      | 0.89029  | 1.9988  | 0.91902 | 0.39907 | --      | --       | --        | --      |
| 6 | 138035183 | rs72978722       | 5 | 0.553     | 0.9614 | 0.2007 | 1.442   | 0.21888 | 0.05173  | 0.93007 | 0.92535 | 0.094189 | 0.36413  | 0.98532 | 0.94502  | 0.14292  | 0.71128  | 0.97901 | 0.72187  | 0.19183 | 0.09943 | 0.98022 | 0.98587 | 0.06667  | 0.4232    | 0.97058 |
| 6 | 138035265 | chr6:138035265:D | 2 | 0.4116    | 3.9962 | 0.2953 | 15.685  | 2.0491  | 0.27719  | 0.83047 | --      | --       | --       | --      | --       | --       | --       | --      | --       | --      | --      | --      | 0.49839 | 2.5812   | 0.5499    | 0.39734 |
| 6 | 138035342 | rs79633824       | 2 | 0.9024    | 0.8862 | 0.6602 | --      | --      | --       | --      | --      | --       | --       | --      | --       | --       | --       | --      | 1.7355   | 1.8185  | 0.63873 | 0.57485 | 0.67044 | 1.1717   | 0.99009   | 0.55246 |
| 6 | 138035346 | rs72978726       | 5 | 0.6938    | 0.9554 | 0.3317 | 0.63827 | 0.43783 | 0.2522   | 0.90605 | 1.0346  | 0.20662  | 0.87297  | 0.92523 | 1.5919   | 0.30655  | 0.12632  | 0.93238 | 0.94488  | 0.36384 | 0.83999 | 0.91241 | 0.83823 | 0.14293  | 0.5185    | 0.92302 |
| 6 | 138035411 | rs150564388      | 2 | 0.9679    | 0.9602 | 0.6062 | --      | --      | --       | --      | --      | --       | --       | --      | --       | --       | --       | --      | 2.1639   | 1.872   | 0.5358  | 0.59954 | 0.68778 | 1.1996   | 0.94852   | 0.57663 |
| 6 | 138035522 | rs76069326       | 4 | 0.73      | 0.864  | 0.6256 | --      | --      | --       | --      | 1.0001  | 0.7611   | 0.95925  | 0.72363 | 0.070367 | 2.178    | 0.11228  | 0.7663  | 2.0453   | 1.3984  | 0.44212 | 0.77889 | 0.81977 | 0.56544  | 0.54226   | 0.7204  |
| 6 | 138035523 | rs77547461       | 4 | 0.8604    | 0.9306 | 0.7674 | --      | --      | --       | --      | 0.88814 | 0.74809  | 0.76138  | 0.63502 | 0.16379  | 2.09     | 0.14515  | 0.66089 | 2.2097   | 1.2966  | 0.36567 | 0.76613 | 0.92139 | 0.54525  | 0.74716   | 0.70783 |
| 6 | 138035527 | rs73560248       | 5 | 0.5564    | 0.9439 | 0.5191 | 0.7309  | 0.40974 | 0.29766  | 0.86825 | 1.0042  | 0.1953   | 0.98504  | 0.92652 | 1.4783   | 0.30417  | 0.18098  | 0.91851 | 0.98687  | 0.33431 | 0.94353 | 0.94545 | 0.8512  | 0.13899  | 0.60552   | 0.90251 |
| 6 | 138035535 | rs79724748       | 5 | 0.0906    | 1.1146 | 0.4837 | 0.8715  | 0.3112  | 0.60563  | 0.8703  | 1.0647  | 0.12452  | 0.56533  | 0.89529 | 1.4803   | 0.18452  | 0.029391 | 0.91803 | 0.95805  | 0.26207 | 0.83223 | 0.79651 | 1.1089  | 0.089595 | 0.16702   | 0.89542 |
| 6 | 138035597 | rs117289618      | 2 | 0.2751    | 1.1365 | 0.1146 | --      | --      | --       | --      | 0.62884 | 1.2453   | 0.61514  | 0.63694 | --       | --       | --       | --      | 0.01545  | 1.9915  | 0.32873 | 0.88212 | --      | --       | --        | --      |
| 6 | 138035756 | rs187029401      | 4 | 0.03594   | 0.4246 | 0.7331 | 1.3833  | 1.4581  | 0.6436   | 0.3694  | 0.57091 | 0.8185   | 0.26563  | 0.61823 | 0.54166  | 1.1018   | 0.44051  | 0.86031 | --       | --      | --      | --      | 0.29225 | 0.55829  | 0.024003  | 0.71552 |
| 6 | 138035764 | rs73560249       | 3 | 0.7829    | 1.2938 | 0.972  | 1.8278  | 1.8175  | 0.56397  | 0.70715 | --      | --       | --       | --      | --       | --       | --       | --      | 0.99022  | 1.9688  | 0.97094 | 0.41146 | 1.2172  | 1.3084   | 0.55677   | 0.39547 |
| 6 | 138035792 | rs75938857       | 5 | 0.2696    | 0.8753 | 0.4218 | 0.7815  | 0.56145 | 0.81041  | 0.81443 | 0.85219 | 0.23376  | 0.41463  | 0.87287 | 0.72088  | 0.38363  | 0.3474   | 0.89951 | 2.4246   | 0.5423  | 0.04144 | 0.82162 | 0.84519 | 0.16433  | 0.14969   | 0.88673 |
| 6 | 138035830 | rs146588548      | 2 | 0.5467    | 2.06   | 0.2438 | --      | --      | --       | --      | 6.8317  | 1.4546   | 0.12206  | 0.67327 | --       | --       | --       | --      | --       | --      | --      | --      | 0.62086 | 1.455    | 0.37608   | 0.48069 |
| 6 | 138036203 | rs651714         | 5 | 0.08586   | 0.9341 | 0.2107 | 0.86516 | 0.12965 | 0.39662  | 0.92182 | 0.91048 | 0.057064 | 0.098618 | 0.99202 | 0.99139  | 0.089889 | 0.90035  | 0.99349 | 1.1785   | 0.11881 | 0.17622 | 0.95498 | 0.89332 | 0.039429 | 0.0029477 | 0.99159 |
| 6 | 138036647 | chr6:138036647:1 | 3 | 0.7801    | 1.2989 | 0.9723 | 1.8296  | 1.8159  | 0.56347  | 0.70754 | --      | --       | --       | --      | --       | --       | --       | --      | 0.99234  | 1.9778  | 0.96866 | 0.40943 | 1.2229  | 1.312    | 0.54942   | 0.39548 |
| 6 | 138036676 | rs17066775       | 5 | 0.2432    | 0.9506 | 0.5139 | 1.2124  | 0.19193 | 0.29946  | 0.9424  | 0.93281 | 0.086104 | 0.3592   | 1       | 1.0052   | 0.12904  | 0.92916  | 0.99226 | 0.7744   | 0.17168 | 0.13586 | 0.98381 | 0.94899 | 0.060385 | 0.29004   | 0.98402 |
| 6 | 138037075 | rs73560251       | 3 | 0.7792    | 1.3008 | 0.9724 | 1.8296  | 1.8159  | 0.56347  | 0.70754 | --      | --       | --       | --      | --       | --       | --       | --      | 0.99201  | 1.981   | 0.96901 | 0.40872 | 1.2258  | 1.3145   | 0.54573   | 0.39533 |
| 6 | 138037172 | rs584794         | 5 | 0.08346   | 0.9342 | 0.2173 | 0.86452 | 0.12959 | 0.39342  | 0.92247 | 0.91279 | 0.057113 | 0.1084   | 0.99032 | 0.99322  | 0.089976 | 0.91718  | 0.99192 | 1.1747   | 0.11884 | 0.18525 | 0.95405 | 0.89311 | 0.039436 | 0.0028931 | 0.99079 |
| 6 | 138037275 | rs78816727       | 5 | 0.5394    | 0.9586 | 0.1753 | 1.4388  | 0.21884 | 0.053327 | 0.93055 | 0.92423 | 0.094169 | 0.35763  | 0.98631 | 0.94648  | 0.14281  | 0.71951  | 0.98055 | 0.70398  | 0.19251 | 0.07884 | 0.9794  | 0.98533 | 0.066708 | 0.42176   | 0.97018 |
| 6 | 138037354 | rs188265421      | 2 | 0.5863    | 0.5191 | 0.2756 | 0.11154 | 1.8242  | 0.19371  | 0.69385 | --      | --       | --       | --      | --       | --       | --       | --      | --       | --      | --      | --      | 1.3341  | 1.3616   | 0.65056   | 0.41495 |
| 6 | 138037366 | rs1518047        | 5 | 0.2621    | 0.953  | 0.5114 | 1.2025  | 0.19091 | 0.3217   | 0.93751 | 0.94112 | 0.0858   | 0.41296  | 0.98441 | 0.99945  | 0.12769  | 0.96429  | 1       | 0.76854  | 0.16795 | 0.123   | 1       | 0.95311 | 0.059479 | 0.34088   | 1       |
| 6 | 138037410 | rs5892168        | 5 | 0.368     | 0.9163 | 0.4339 | 0.62862 | 0.40142 | 0.1633   | 0.85409 | 1.0361  | 0.19391  | 0.86679  | 0.92955 | 1.3502   | 0.294    | 0.30018  | 0.92364 | 1.0057   | 0.35169 | 0.98843 | 0.88833 | 0.81691 | 0.13648  | 0.39792   | 0.91526 |
| 6 | 138037827 | rs118113781      | 2 | 0.2755    | 1.4122 | 0.1215 | --      | --      | --       | --      | 0.62953 | 1.2467   | 0.61599  | 0.63605 | --       | --       | --       | --      | 0.016553 | 1.9914  | 0.32932 | 0.88143 | --      | --       | --        | --      |
| 6 | 138037879 | rs56833005       | 5 | 0.4069    | 0.9232 | 0.5167 | 0.69119 | 0.39198 | 0.23783  | 0.8593  | 1.0393  | 0.19318  | 0.85417  | 0.92601 | 1.3344   | 0.29445  | 0.31822  | 0.92502 | 0.99558  | 0.33504 | 0.97103 | 0.92454 | 0.82297 | 0.13604  | 0.43747   | 0.9128  |
| 6 | 138037911 | rs59501825       | 3 | 0.522     | 0.5378 | 0.8139 | 0.76018 | 1.4879  | 0.49475  | 0.54164 | --      | --       | --       | 0.16056 | 2.1197   | 0.14539  | 0.65716  | --      | --       | --      | --      | 0.71726 | 1.5985  | 0.7835   | 0.37023   |         |
| 6 | 138037964 | rs137860492      | 2 | 0.4763    | 1.4672 | 0.7542 | --      | --      | --       | --      | 1.8975  | 0.98193  | 0.058298 | 0.34242 | --       | --       | --       | --      | --       | --      | --      | --      | 1.3138  | 0.64354  | 0.15714   | 0.44593 |
| 6 | 138038005 | rs149536822      | 4 | 0.9123    | 1.023  | 0.3228 | 1.4759  | 0.94277 | 0.6544   | 0.68361 | 0.75808 | 0.35538  | 0.30274  | 0.74818 | 0.57242  | 0.52638  | 0.13244  | 0.79034 | --       | --      | --      | --      | 1.3485  | 0.2294   | 0.15138   | 0.76128 |
| 6 | 138038667 | rs7582534        | 4 | 0.165     | 0.2902 | 0.4477 | 0.11044 | 1.6385  | 0.3195   | 0.83129 | 3.0871  | 1.9293   | 0.3509   | 0.59914 | 0.04314  | 2.1766   | 0.13003  | 0.95368 | --       | --      | --      | --      | 0.39646 | 1.5667   | 0.51942   | 0.61835 |
| 6 | 138038835 | rs146236536      | 2 | 0.3996    | 3.7172 | 0.8221 | --      | --      | --       | --      | --      | --       | --       | --      | --       | --       | --       | --      | 4.8517   | 1.9578  | 0.4042  | 0.80176 | 2.3445  | 2.5754   | 0.04445   | 0.35701 |
| 6 | 138038836 | rs72978734       | 5 | 0.5468    | 0.9591 | 0.1705 | 1.4416  | 0.21878 | 0.051813 | 0.92995 | 0.92432 | 0.09415  | 0.35813  | 0.98612 | 0.94616  | 0.14279  | 0.71722  | 0.97988 | 0.70261  | 0.19279 | 0.07829 | 0.98236 | 0.98655 | 0.066709 | 0.43623   | 0.97082 |
| 6 | 138038905 | rs514475         | 5 | 0.0001295 | 0.8548 | 0.9737 | 0.91445 | 0.17493 | 0.65454  | 0.98206 | 0.83417 | 0.080575 | 0.023123 | 0.97656 | 0.85934  | 0.11784  | 0.2056   | 0.99083 | 0.92644  | 0.16296 | 0.67428 | 1       | 0.84949 | 0.057861 | 0.0037754 | 0.98479 |
| 6 | 138038944 | rs80119750       | 2 | 0.7572    | 0.7262 | 0.8921 | --      | --      | --       | --      | 0.65858 | 1.2608   | 0.5263   | 0.5559  | --       | --       | --       | --      | --       | --      | --      | --      | 0.88834 | 1.8101   | 0.91889   | 0.38335 |
| 6 | 138038966 | rs57537582       | 5 | 0.3995    | 0.9221 | 0.4979 | 0.68162 | 0.39153 | 0.22164  | 0.85468 | 1.0379  | 0.19204  | 0.86206  | 0.93984 | 1.3434   | 0.29428  | 0.31032  | 0.93021 | 0.98896  | 0.33316 | 0.95502 | 0.91947 | 0.82169 | 0.13628  | 0.4       |         |

|   |           |                  |   |         |        |         |         |         |          |         |          |          |          |          |          |          |          |         |          |         |         |         |         |           |           |         |
|---|-----------|------------------|---|---------|--------|---------|---------|---------|----------|---------|----------|----------|----------|----------|----------|----------|----------|---------|----------|---------|---------|---------|---------|-----------|-----------|---------|
| 6 | 138044053 | rs79552706       | 4 | 0.1639  | 0.2883 | 0.4447  | 0.11096 | 1.6323  | 0.31916  | 0.83582 | 3.1041   | 1.9278   | 0.34688  | 0.59543  | 0.042401 | 2.1786   | 0.12791  | 0.85075 | --       | --      | --      | --      | 0.39265 | 1.5858    | 0.51523   | 0.62176 |
| 6 | 138044296 | rs72978741       | 5 | 0.2757  | 0.9537 | 0.5288  | 1.2248  | 0.19583 | 0.26956  | 0.94104 | 0.94586  | 0.806592 | 0.44888  | 0.97457  | 1.0047   | 0.12871  | 0.92733  | 0.98848 | 0.78106  | 0.17121 | 0.14908 | 0.9747  | 0.94773 | 0.060223  | 2.27064   | 0.98145 |
| 6 | 138044634 | rs72978742       | 5 | 0.5527  | 0.96   | 0.1764  | 1.4394  | 0.21847 | 0.05281  | 0.93436 | 0.92741  | 0.094312 | 0.37578  | 0.98167  | 0.94754  | 0.14296  | 0.72634  | 0.97806 | 0.70402  | 0.19264 | 0.0788  | 0.97749 | 0.98558 | 0.0666731 | 0.42427   | 0.96841 |
| 6 | 138045000 | rs113931112      | 4 | 0.5728  | 1.2073 | 0.9577  | 2.6245  | 1.5328  | 0.13255  | 0.50282 | 1.2965   | 0.64052  | 0.51712  | 0.64031  | --       | --       | --       | --      | 1.0477   | 1.5247  | 0.92492 | 0.52266 | 1.1165  | 0.41987   | 0.51596   | 0.76962 |
| 6 | 138045051 | rs7766288        | 5 | 0.4134  | 0.9526 | 0.2733  | 1.4174  | 0.21876 | 0.068377 | 0.92557 | 0.918105 | 0.09308  | 0.32964  | 1        | 0.91798  | 0.14236  | 0.54451  | 0.9751  | 0.75265  | 0.19163 | 0.14681 | 0.9778  | 0.9732  | 0.066074  | 0.32188   | 0.96621 |
| 6 | 138045059 | rs185997432      | 3 | 0.6399  | 0.4311 | 0.0323  | 0.02306 | 1.663   | 0.40393  | 0.93012 | 7.4256   | 1.4573   | 0.2106   | 0.78228  | --       | --       | --       | --      | --       | --      | --      | --      | 0.37687 | 1.9510    | 0.61204   | 0.57256 |
| 6 | 138046071 | rs34708886       | 5 | 0.8431  | 0.9416 | 0.3138  | 3.8949  | 1.5584  | 0.1045   | 0.78714 | 2.273    | 0.63813  | 0.048348 | 0.63671  | 0.87114  | 0.50739  | 0.6266   | 0.92506 | 0.1089   | 1.9817  | 0.32041 | 0.74369 | 0.6886  | 0.33982   | 0.30687   | 0.88496 |
| 6 | 138046644 | rs9494849        | 4 | 0.8001  | 0.9014 | 0.769   | --      | --      | --       | 0.88702 | 0.75848  | 0.7432   | 0.59045  | 0.13883  | 2.1282   | 0.096919 | 0.64875  | 1.9449  | 1.2817   | 0.42305 | 0.7358  | 0.8941  | 0.5443  | 0.6878    | 0.68961   |         |
| 6 | 138046651 | rs148059849      | 4 | 0.2661  | 0.8004 | 0.6691  | --      | --      | --       | 0.98633 | 0.37586  | 0.95656  | 0.79881  | 0.42712  | 1.0356   | 0.14668  | 0.71688  | 0.41836 | 0.69662  | 0.22955 | 0.70911 | 0.82458 | 0.25932 | 0.3666    | 0.8325    |         |
| 6 | 138046665 | rs9494850        | 5 | 0.1007  | 1.0598 | 0.2658  | 0.96218 | 0.12283 | 0.62253  | 1       | 1.0895   | 0.056117 | 0.097354 | 0.97634  | 1.0468   | 0.085115 | 0.6231   | 1       | 0.86388  | 0.11498 | 0.21952 | 1       | 1.1081  | 0.038051  | 0.0018439 | 1       |
| 6 | 138046690 | rs117444695      | 5 | 0.4027  | 0.8774 | 0.293   | 0.89688 | 0.55706 | 0.9614   | 0.85745 | 0.80916  | 0.24419  | 0.30231  | 0.87649  | 0.65838  | 0.42361  | 0.26614  | 0.908   | 2.8862   | 0.57503 | 0.02462 | 0.83203 | 0.82869 | 0.17337   | 0.14682   | 0.89211 |
| 6 | 138046716 | rs72978745       | 5 | 0.5646  | 0.9621 | 0.192   | 1.4329  | 0.2181  | 0.055052 | 0.93558 | 0.92676  | 0.094174 | 0.37499  | 0.97831  | 0.95559  | 0.14274  | 0.7849   | 0.97823 | 0.71206  | 0.19172 | 0.0855  | 0.97958 | 0.98644 | 0.066695  | 0.43142   | 0.96687 |
| 6 | 138047099 | rs78466793       | 5 | 0.06238 | 1.1749 | 0.59673 | 1.503   | 0.3387  | 0.16707  | 0.88201 | 1.0432   | 0.17029  | 0.80738  | 0.88031  | 0.93761  | 0.33604  | 0.99048  | 0.9187  | 1.7445   | 0.34975 | 0.07284 | 0.91976 | 1.1878  | 0.11696   | 0.38681   | 0.90834 |
| 6 | 138047177 | rs150558264      | 2 | 0.2728  | 0.1327 | 0.1092  | --      | --      | --       | 0.63255 | 1.2555   | 0.60838  | 0.61709  | --       | --       | --       | --       | --      | 0.015126 | 1.9637  | 0.29255 | 0.81164 | --      | --        | --        | --      |
| 6 | 138047343 | rs10223512       | 5 | 0.7116  | 0.8641 | 0.9072  | 0.56348 | 1.6514  | 0.33878  | 0.4523  | 0.89599  | 0.75897  | 0.75605  | 0.5701   | 0.93675  | 2.2044   | 0.066109 | 0.5543  | 1.8705   | 1.285   | 0.44365 | 0.72368 | 0.85755 | 0.53531   | 0.6122    | 0.65379 |
| 6 | 138047534 | rs143900613      | 2 | 0.8542  | 1.2256 | 0.9279  | --      | --      | --       | 1.1563  | 1.2802   | 0.8777   | 0.77433  | --       | --       | --       | --       | --      | --       | --      | --      | --      | 1.4564  | 2.2035    | 0.78881   | 0.47353 |
| 6 | 138047607 | chr6:138047607:1 | 5 | 0.1713  | 1.0589 | 0.1032  | 0.6007  | 0.41192 | 0.26324  | 0.81218 | 1.1524   | 0.18322  | 0.38783  | 0.93495  | 1.0167   | 0.26816  | 0.16376  | 0.95124 | 2.298    | 0.53083 | 0.05877 | 0.83076 | 0.84381 | 0.142     | 0.10274   | 0.90482 |
| 6 | 138047994 | rs6570184        | 5 | 0.6757  | 1.0208 | 0.0612  | 1.0484  | 0.12382 | 0.8591   | 0.96797 | 1.0525   | 0.055794 | 0.316    | 0.97106  | 1.4505   | 0.085616 | 0.57198  | 0.98683 | 0.75993  | 0.11379 | 0.02093 | 0.97361 | 1.0896  | 0.038627  | 0.012943  | 0.98087 |
| 6 | 138048263 | rs144613799      | 2 | 0.7475  | 1.4461 | 0.8276  | 1.9315  | 1.7548  | 0.54987  | 0.75796 | --       | --       | --       | --       | --       | --       | --       | --      | --       | --      | --      | --      | 1.1662  | 1.5127    | 0.67817   | 0.40041 |
| 6 | 138048322 | rs6917211        | 5 | 0.6802  | 1.0205 | 0.0627  | 1.0604  | 0.12423 | 0.79621  | 0.9677  | 1.0557   | 0.055892 | 0.30979  | 0.96945  | 1.0432   | 0.085606 | 0.62868  | 0.98776 | 0.76045  | 0.11343 | 0.02246 | 0.97363 | 1.0875  | 0.038633  | 0.014783  | 0.98252 |
| 6 | 138048427 | rs6917696        | 5 | 0.6857  | 1.0205 | 0.0539  | 1.0667  | 0.12422 | 0.77485  | 0.96619 | 1.0563   | 0.055826 | 0.30545  | 0.97148  | 1.0477   | 0.085526 | 0.59034  | 0.98967 | 0.75343  | 0.11436 | 0.01705 | 0.97178 | 1.0882  | 0.03867   | 0.016893  | 0.98174 |
| 6 | 138048511 | rs11759533       | 5 | 0.6972  | 1.1291 | 0.9858  | 1.0094  | 1.1971  | 0.85152  | 0.42623 | 1.2405   | 0.97133  | 0.45598  | 0.30611  | 1.2586   | 0.60099  | 0.37722  | 0.66434 | 1.6467   | 0.90812 | 0.3065  | 0.49419 | 0.95038 | 0.47016   | 0.9293    | 0.46121 |
| 6 | 138048516 | rs117744515      | 5 | 0.08924 | 0.8907 | 0.9111  | 1.0229  | 0.30051 | 0.9888   | 0.8523  | 0.92015  | 0.13107  | 0.49258  | 0.90414  | 0.72735  | 0.24942  | 0.081536 | 0.91691 | 0.82631  | 0.31954 | 0.39669 | 0.74294 | 0.89493 | 0.091097  | 0.077746  | 0.91087 |
| 6 | 138048818 | rs190682498      | 5 | 0.8177  | 1.1536 | 0.0876  | 0.85089 | 2.5987  | 0.99445  | 0.46745 | 0.47467  | 0.60848  | 0.14818  | 0.81375  | 6.4656   | 0.88417  | 0.064414 | 0.74714 | 20.079   | 1.9374  | 0.05446 | 0.58051 | 0.48941 | 0.6019    | 1.3698    | 0.69229 |
| 6 | 138049194 | rs190928013      | 4 | 0.2746  | 1.4062 | 0.6347  | 3.7924  | 1.6886  | 0.099576 | 0.72839 | 1.4024   | 0.74221  | 0.49109  | 0.67518  | 2.1496   | 0.53357  | 0.082643 | 0.78513 | --       | --      | --      | --      | 0.94321 | 0.46672   | 0.8802    | 0.74939 |
| 6 | 138049258 | rs142936284      | 2 | 0.7397  | 1.4869 | 0.8405  | 1.9133  | 1.7305  | 0.56339  | 0.76834 | --       | --       | --       | --       | --       | --       | --       | --      | --       | --      | --      | --      | 1.1826  | 1.6491    | 0.64466   | 0.39905 |
| 6 | 138049315 | rs7759510        | 4 | 0.5842  | 0.7973 | 0.773   | --      | --      | --       | 0.8613  | 0.77399  | 0.72001  | 0.64192  | 0.10649  | 2.1435   | 0.095863 | 0.68682  | 1.5472  | 1.3994   | 0.60765 | 0.7231  | 0.79052 | 0.53927 | 0.43324   | 0.69376   |         |
| 6 | 138049381 | rs117583370      | 2 | 0.3024  | 0.058  | 0.0151  | --      | --      | --       | 0.74448 | 1.1812   | 0.69681  | 0.54649  | --       | --       | --       | --       | --      | 0.00293  | 1.9492  | 0.2748  | 0.79725 | --      | --        | --        | --      |
| 6 | 138049491 | rs6923588        | 4 | 0.9205  | 1.0865 | 0.99    | 1.4922  | 1.6898  | 0.77242  | 0.63608 | 0.69339  | 1.6621   | 0.4597   | 0.31531  | --       | --       | --       | --      | 1.2352   | 1.5761  | 0.8133  | 0.5001  | 1.0859  | 1.7338    | 0.62519   | 0.30499 |
| 6 | 138049613 | rs6907973        | 4 | 0.6825  | 0.8448 | 0.7663  | --      | --      | --       | 0.85537 | 0.87226  | 0.68947  | 0.57731  | 0.12031  | 2.0834   | 0.10338  | 0.67967  | 1.6565  | 1.2984   | 0.52698 | 0.7012  | 0.85203 | 0.54063 | 0.58907   | 0.69502   |         |
| 6 | 138049838 | rs186928082      | 4 | 0.2005  | 2.6761 | 0.0264  | 1.4773  | 2.3448  | 0.48956  | 0.61897 | 1.3301   | 0.60186  | 0.56432  | 0.83276  | 94.558   | 1.4052   | 0.21769  | 0.86039 | --       | --      | --      | --      | 1.1079  | 0.43208   | 0.36746   | 0.82835 |
| 6 | 138050046 | rs9494851        | 4 | 0.5522  | 0.784  | 0.7003  | --      | --      | --       | 0.89634 | 0.77712  | 0.79339  | 0.66452  | 0.072395 | 2.1458   | 0.088865 | 0.73316  | 1.3603  | 1.3767   | 0.68811 | 0.6675  | 0.78513 | 0.52941 | 0.57095   | 0.73891   | 0.80873 |
| 6 | 138050659 | rs143144664      | 2 | 0.4161  | 0.3384 | 0.419   | 0.12086 | 1.8434  | 0.41548  | 0.53247 | --       | --       | --       | --       | --       | --       | --       | --      | --       | --      | --      | --      | 1.0433  | 1.9275    | 0.73489   | 0.31673 |
| 6 | 138050926 | rs185508825      | 5 | 0.598   | 1.1217 | 0.1369  | 1.4221  | 0.88311 | 0.57636  | 0.81798 | 1.8957   | 0.2899   | 0.026309 | 0.9494   | 0.57139  | 0.3773   | 0.067308 | 0.92621 | 0.7857   | 0.54585 | 0.66745 | 0.94731 | 1.2055  | 0.19696   | 0.174     | 0.91456 |
| 6 | 138051227 | rs113761368      | 5 | 0.6737  | 1.0801 | 0.7639  | 0.58821 | 0.92176 | 0.35754  | 0.63845 | 0.85876  | 0.3511   | 0.59524  | 0.774    | 0.59363  | 1.0047   | 0.2017   | 0.53543 | 0.98942  | 0.75731 | 0.99898 | 0.74692 | 1.3007  | 0.23659   | 0.22035   | 0.78613 |
| 6 | 138051764 | rs192579347      | 3 | 0.7309  | 1.2394 | 0.8299  | 1.5647  | 2.1669  | 0.9573   | 0.65765 | 1.8767   | 0.97569  | 0.32515  | 0.64504  | --       | --       | --       | --      | --       | --      | --      | --      | 0.85449 | 0.87519   | 0.9245    | 0.72394 |
| 6 | 138051845 | rs188252858      | 4 | 0.1421  | 0.7418 | 0.4816  | --      | --      | --       | 0.92054 | 0.38992  | 0.82501  | 0.82334  | 0.3942   | 1.0061   | 0.12864  | 0.75628  | 0.29723 | 0.70384  | 0.18868 | 0.83431 | 0.79724 | 0.26202 | 0.28599   | 0.85304   |         |
| 6 | 138052046 | rs184129854      | 5 | 0.5901  | 0.815  | 0.2899  | 0.97943 | 0.91424 | 0.58505  | 0.651   | 1.1359   | 0.60459  | 0.885    | 0.83352  | 2.2251   | 1.1995   | 0.40977  | 0.58869 | 0.2083   | 0.71436 | 0.04223 | 0.90944 | 1.1466  | 0.63741   | 0.62802   | 0.5857  |
| 6 | 138052096 | rs9321628        | 5 | 0.8508  | 0.9408 | 0.9237  | 1.4521  | 1.5563  | 0.48047  | 0.51179 | 0.92879  | 0.66845  | 0.87714  | 0.54837  | 0.95157  | 0.56425  | 0.80618  | 0.8623  | 0.41206  | 1.0021  | 0.23586 | 0.63254 | 1.189   | 0.60683   | 0.46287   | 0.48532 |
| 6 | 138052272 | rs144341999      | 3 | 0.6405  | 0.6904 | 0.1709  | 0.13331 | 1.4894  | 0.15126  | 0.42727 | 2.3352   | 0.8285   | 0.25511  | 0.80926  | --       | --       | --       | --      | --       | --      | --      | --      | 0.44002 | 0.92829   | 0.095315  | 0.37732 |
| 6 | 138052678 | rs59068003       | 5 | 0.6359  | 0.8279 | 0.8885  | 0.7807  | 2.4135  | 0.75543  | 0.4037  | 0.93146  | 0.76368  | 0.8408   | 0.58686  | 0.10646  | 2.1033   | 0.09018  | 0.68229 | 1.3748   | 1.2678  | 0.65516 | 0.65312 | 0.81782 | 0.53051   | 0.64631   | 0.7331  |
| 6 | 138052680 | rs643746         | 5 | 0.1411  | 0.9395 | 0.1464  | 0.87319 | 0.12312 | 0.44446  | 1       | 0.91234  | 0.055978 | 0.10625  | 1        | 0.98176  | 0.086714 | 0.79847  | 1       | 1.1996   | 0.11421 | 0.13817 | 1       | 0.89158 | 0.038966  | 0.0035315 | 1       |
| 6 | 138052723 | rs181727968      | 2 | 0.2631  | 0.0413 | 0.0141  | --      | --      | --       | 0.59205 | 1.2687   | 0.54508  | 0.6193   | --       | --       | --       | --       | --      | 0.001961 | 1.9486  | 0.27647 | 0.80177 | --      | --        | --        | --      |
| 6 | 138052771 | rs9402917        |   |         |        |         |         |         |          |         |          |          |          |          |          |          |          |         |          |         |         |         |         |           |           |         |





|   |           |             |   |          |        |        |         |         |         |         |         |          |          |          |         |          |          |          |         |         |         |         |         |          |           |         |
|---|-----------|-------------|---|----------|--------|--------|---------|---------|---------|---------|---------|----------|----------|----------|---------|----------|----------|----------|---------|---------|---------|---------|---------|----------|-----------|---------|
| 6 | 138069045 | rs77568869  | 5 | 0.5154   | 0.9314 | 0.2083 | 1.0436  | 0.43248 | 0.72919 | 0.76436 | 1.0233  | 0.14347  | 0.85324  | 0.95618  | 0.56046 | 0.26385  | 0.010532 | 0.94362  | 1.427   | 0.33168 | 0.23193 | 0.92637 | 0.91707 | 0.10581  | 0.19411   | 0.93429 |
| 6 | 138069112 | rs77083768  | 2 | 0.9735   | 1.032  | 0.7524 | --      | --      | --      | 0.79317 | 1.2619  | 0.76444  | 0.63925  | --       | --      | --       | --       | --       | --      | --      | --      | --      | 1.4483  | 1.432    | 0.41453   | 0.53633 |
| 6 | 138069166 | rs9494858   | 4 | 0.5732   | 0.7931 | 0.7513 | --      | --      | --      | 0.91714 | 0.78231 | 0.83067  | 0.67246  | 0.091008 | 2.1421  | 0.11332  | 0.11332  | 0.72969  | 1.3504  | 1.3724  | 0.6944  | 0.6709  | 0.78247 | 0.52983  | 0.57253   | 0.73566 |
| 6 | 138069191 | rs75609024  | 2 | 0.9749   | 1.0302 | 0.7501 | --      | --      | --      | 0.78994 | 1.2621  | 0.76016  | 0.63793  | --       | --      | --       | --       | --       | --      | --      | --      | --      | 1.4514  | 1.4339   | 0.41229   | 0.53673 |
| 6 | 138069309 | rs12193654  | 5 | 0.9423   | 0.9889 | 0.8106 | 0.5386  | 0.72076 | 0.20155 | 0.46497 | 0.8388  | 0.28748  | 0.2245   | 0.50332  | 1.0051  | 0.53301  | 0.76342  | 0.57765  | 1.4813  | 0.735   | 0.14835 | 0.4026  | 1.0988  | 0.21155  | 0.30703   | 0.50229 |
| 6 | 138069508 | rs143452831 | 2 | 0.9656   | 0.9551 | 0.9545 | --      | --      | --      | 0.91266 | 1.3303  | 0.91317  | 0.67184  | --       | --      | --       | --       | --       | --      | --      | --      | --      | 1.036   | 1.7797   | 0.92426   | 0.36821 |
| 6 | 138069549 | rs78543622  | 5 | 0.5844   | 0.805  | 0.9059 | 0.7206  | 2.3933  | 0.69803 | 0.39577 | 0.92956 | 0.76327  | 0.83758  | 0.58685  | 0.11019 | 2.1194   | 0.10353  | 0.69732  | 1.2024  | 1.2284  | 0.7674  | 0.61262 | 0.73962 | 0.52843  | 0.5902    | 0.72531 |
| 6 | 138069623 | rs77569810  | 2 | 0.9149   | 0.8854 | 0.7338 | --      | --      | --      | 0.63558 | 1.4987  | 0.63108  | 0.6419   | --       | --      | --       | --       | --       | --      | --      | --      | --      | 1.19317 | 1.7504   | 0.38623   | 0.51727 |
| 6 | 138069776 | rs188765703 | 2 | 0.9898   | 0.9862 | 0.9026 | --      | --      | --      | 0.89648 | 1.3321  | 0.90287  | 0.70787  | --       | --      | --       | --       | --       | --      | --      | --      | --      | 1.1845  | 1.8457   | 0.93219   | 0.454   |
| 6 | 138069930 | rs114556954 | 2 | 0.9688   | 0.9633 | 0.7462 | --      | --      | --      | 0.73994 | 1.2575  | 0.69571  | 0.62748  | --       | --      | --       | --       | --       | --      | --      | --      | --      | 1.3866  | 1.4777   | 0.36602   | 0.4969  |
| 6 | 138069950 | rs114822574 | 2 | 0.9678   | 0.9621 | 0.7456 | --      | --      | --      | 0.7387  | 1.2571  | 0.69399  | 0.62724  | --       | --      | --       | --       | --       | --      | --      | --      | --      | 1.3866  | 1.4784   | 0.36556   | 0.49706 |
| 6 | 138070027 | rs117074670 | 2 | 0.265    | 0.0283 | 0.0059 | --      | --      | --      | 0.5876  | 1.2713  | 0.53678  | 0.61643  | --       | --      | --       | --       | 0.000974 | 1.9462  | 0.27355 | 0.79814 | --      | --      | --       | --        | --      |
| 6 | 138070058 | rs1890370   | 5 | 0.04159  | 0.9115 | 0.1752 | 0.78413 | 0.14372 | 0.10704 | 0.94804 | 0.86751 | 0.061859 | 0.024779 | 1        | 0.93769 | 0.093738 | 0.48733  | 0.96956  | 1.1944  | 0.12808 | 0.17078 | 1       | 0.89665 | 0.04446  | 0.019434  | 0.95914 |
| 6 | 138070179 | rs17066831  | 2 | 0.9263   | 0.8839 | 0.4863 | --      | --      | --      | 0.31217 | 2.0038  | 0.38927  | 0.60955  | --       | --      | --       | --       | --       | 2.0259  | 1.7889  | 0.63687 | 0.73664 | --      | --       | --        | --      |
| 6 | 138070451 | rs117485849 | 4 | 0.6153   | 1.1136 | 0.7731 | 1.0177  | 0.86956 | 0.89983 | 0.87856 | 1.3794  | 0.47759  | 0.41223  | 0.81842  | 1.9642  | 0.71064  | 0.37981  | 0.83837  | --      | --      | --      | --      | 0.97058 | 0.26595  | 0.83617   | 0.87154 |
| 6 | 138070659 | rs9494859   | 5 | 0.5056   | 0.734  | 0.9532 | 1.2114  | 1.2802  | 0.66648 | 0.56083 | 0.61202 | 0.85556  | 0.16689  | 0.42134  | 0.34094 | 1.5442   | 0.14619  | 0.60825  | 0.53571 | 1.1599  | 0.36604 | 0.51479 | 1.024   | 0.8173   | 0.95071   | 0.32263 |
| 6 | 138070701 | rs182222256 | 2 | 0.4687   | 0.4563 | 0.8867 | 0.5822  | 2.0252  | 0.64806 | 0.58841 | 0.41382 | 1.2816   | 0.076156 | 0.37693  | --      | --       | --       | --       | --      | --      | --      | --      | --      | --       | --        | --      |
| 6 | 138070983 | rs187184397 | 2 | 0.8733   | 0.8395 | 0.8291 | --      | --      | --      | 0.72702 | 1.2833  | 0.71361  | 0.68688  | --       | --      | --       | --       | --       | --      | --      | --      | --      | 1.2395  | 2.1121   | 0.87185   | 0.41798 |
| 6 | 138070986 | rs190526076 | 5 | 0.9486   | 0.9799 | 0.9975 | 1.2728  | 1.5925  | 0.45276 | 0.34523 | 1.0979  | 0.53258  | 0.70594  | 0.84867  | 1.1     | 1.6099   | 0.88892  | 0.30157  | 1.023   | 1.1604  | 0.95    | 0.37218 | 0.87302 | 0.44605  | 0.11483   | 0.35243 |
| 6 | 138071287 | rs999638    | 5 | 0.01149  | 0.9322 | 0.4373 | 0.88706 | 0.12355 | 0.50374 | 0.96167 | 0.92915 | 0.054958 | 0.19269  | 1        | 1.0119  | 0.084989 | 0.97759  | 1        | 1.1023  | 0.11522 | 0.40077 | 0.96183 | 0.90588 | 0.038185 | 0.005865  | 1       |
| 6 | 138071308 | rs1538333   | 5 | 0.006083 | 0.9265 | 0.4426 | 0.88465 | 0.12428 | 0.44674 | 0.95081 | 0.92353 | 0.05501  | 0.15616  | 0.98827  | 1.0079  | 0.085568 | 0.97109  | 0.99379  | 1.0928  | 0.11534 | 0.44603 | 0.95225 | 0.89991 | 0.038256 | 0.0036635 | 0.98882 |
| 6 | 138071309 | rs999637    | 2 | 0.2729   | 0.2132 | 0.2273 | --      | --      | --      | --      | --      | --       | --       | 0.025174 | 2.2528  | 0.061454 | 0.76893  | --       | --      | --      | --      | 0.54039 | 1.1725  | 0.35415  | 0.37562   | --      |
| 6 | 138071321 | rs74318493  | 5 | 0.2486   | 0.8554 | 0.4764 | 1.6792  | 0.64923 | 0.11622 | 0.56338 | 0.74726 | 0.26042  | 0.074592 | 0.60491  | 1.2505  | 0.35916  | 0.37265  | 0.7744   | 1.7186  | 0.88277 | 0.1026  | 0.37832 | 0.57565 | 0.18761  | 0.03114   | 0.58634 |
| 6 | 138071343 | rs139595330 | 4 | 0.5186   | 1.3274 | 0.8299 | 0.81803 | 1.6632  | 0.90257 | 0.32785 | --      | --       | 0.67773  | 1.3631   | 0.22287 | 0.32576  | 4.9624   | 1.7785   | 0.02901 | 0.42738 | 1.3681  | 0.50149 | 0.17333 | 0.35969  | --        | --      |
| 6 | 138071418 | rs145159372 | 3 | 0.9317   | 0.9671 | 0.8936 | --      | --      | --      | 1.3255  | 0.77905 | 0.42308  | 0.45655  | 0.98606  | 1.6039  | 0.93914  | 0.39722  | --       | --      | --      | --      | 1.86115 | 0.46934 | 0.25211  | 0.4129    | --      |
| 6 | 138071443 | rs149220424 | 4 | 0.6911   | 0.8984 | 0.1492 | 1.4622  | 0.90888 | 0.64678 | 0.68989 | 0.59243 | 0.33141  | 0.052029 | 0.78331  | 0.59722 | 0.52146  | 0.16821  | 0.80487  | --      | --      | --      | 1.3407  | 0.22564 | 0.14404  | 0.75951   | --      |
| 6 | 138071502 | rs3900757   | 5 | 0.5242   | 0.9422 | 0.5402 | 0.48231 | 0.47205 | 0.12283 | 0.83171 | 0.88071 | 0.19142  | 0.41636  | 0.82438  | 1.0658  | 0.28622  | 0.7458   | 0.90808  | 1.382   | 0.44087 | 0.30445 | 0.71118 | 0.96222 | 0.12356  | 0.61152   | 0.85501 |
| 6 | 138071954 | rs186496068 | 3 | 0.6082   | 0.7445 | 0.196  | --      | --      | --      | 2.6344  | 0.92703 | 0.073486 | 0.5549   | 0.70738  | 1.0906  | 0.7094   | 0.75485  | --       | --      | --      | --      | 0.40757 | 0.4653  | 0.063209 | 0.773     | --      |
| 6 | 138072312 | rs75142623  | 5 | 0.4984   | 0.9216 | 0.9716 | 1.2039  | 0.57121 | 0.71712 | 0.5268  | 0.98245 | 0.2331   | 0.92892  | 0.64196  | 0.981   | 0.43557  | 0.85846  | 0.65132  | 0.9896  | 0.48308 | 0.98521 | 0.66206 | 0.85967 | 0.16269  | 0.36046   | 0.64983 |
| 6 | 138072464 | rs72978762  | 5 | 0.2921   | 1.1633 | 0.8264 | 0.68261 | 0.57768 | 0.57043 | 0.89603 | 1.1834  | 0.2933   | 0.49428  | 0.852    | 1.9878  | 0.42194  | 0.23891  | 0.90569  | 1.0611  | 0.4916  | 0.8988  | 0.7129  | 1.1597  | 0.20345  | 0.23283   | 0.8749  |
| 6 | 138073403 | rs3853402   | 5 | 0.5644   | 1.0192 | 0.6582 | 0.95641 | 1.4449  | 0.66796 | 0.9429  | 0.98409 | 0.06557  | 0.82824  | 0.98417  | 0.91579 | 0.10592  | 0.45323  | 0.97805  | 1.1134  | 0.13859 | 0.43418 | 1       | 1.0526  | 0.044762 | 0.29876   | 0.97618 |
| 6 | 138073678 | rs142601174 | 5 | 0.647    | 0.8962 | 0.9345 | 1.0072  | 0.77616 | 0.72616 | 0.54745 | 1.3025  | 0.30396  | 0.2941   | 0.84495  | 0.85993 | 0.67429  | 0.83134  | 0.58799  | 1.6155  | 1.0278  | 0.21207 | 0.4326  | 0.96871 | 0.26016  | 0.8328    | 0.56424 |
| 6 | 138073955 | rs144247858 | 2 | 0.6401   | 1.5549 | 0.7251 | --      | --      | --      | 1.0078  | 1.5532  | 0.98514  | 0.52166  | --       | --      | --       | --       | --       | 2.0047  | 1.189   | 0.545   | 0.8778  | --      | --       | --        | --      |
| 6 | 138074594 | rs188091219 | 2 | 0.5992   | 1.4969 | 0.9777 | --      | --      | --      | 1.5212  | 0.95987 | 0.28848  | 0.39086  | --       | --      | --       | --       | --       | --      | --      | --      | --      | 1.4547  | 1.2778   | 0.0027411 | 0.39715 |
| 6 | 138074768 | rs190178478 | 5 | 0.9922   | 0.9984 | 0.8653 | 0.97217 | 0.82215 | 0.88936 | 0.74441 | 0.75445 | 0.36369  | 0.31843  | 0.76264  | 0.83544 | 0.58908  | 0.50207  | 0.79233  | 0.76059 | 0.72605 | 0.54578 | 0.62172 | 1.1501  | 0.2107   | 0.94112   | 0.80023 |
| 6 | 138074828 | rs116914970 | 3 | 0.8859   | 0.9691 | 0.5201 | 0.38511 | 0.83621 | 0.18628 | 0.70267 | --      | --       | 1.0355   | 0.62915  | 0.96603 | 0.65458  | --       | --       | --      | --      | 1.0372  | 0.24272 | 0.95395 | 0.72078  | --        | --      |
| 6 | 138075443 | rs11961697  | 5 | 0.2572   | 0.9498 | 0.1112 | 0.85541 | 0.12915 | 0.35404 | 0.93288 | 0.91395 | 0.056057 | 0.11272  | 1        | 1.0926  | 0.086423 | 0.30512  | 1        | 1.1199  | 0.12007 | 0.34813 | 0.96634 | 0.89228 | 0.038884 | 0.0053802 | 1       |
| 6 | 138076119 | rs146002228 | 2 | 0.7845   | 0.6263 | 0.1101 | --      | --      | --      | --      | --      | --       | --       | --       | --      | --       | --       | 5.7068   | 2.0024  | 0.21807 | 0.64058 | 0.1665  | 0.93954 | 0.13244  | 0.51112   | --      |
| 6 | 138076129 | rs187852803 | 3 | 0.9657   | 1.0121 | 0.9312 | --      | --      | --      | 0.91955 | 0.50847 | 0.86891  | 0.84933  | 0.88509  | 0.6712  | 0.79529  | 0.78106  | --       | --      | --      | --      | 1.119   | 0.38746 | 0.98954  | 0.83717   | --      |
| 6 | 138076153 | rs6927210   | 5 | 0.0056   | 0.926  | 0.4884 | 0.87684 | 0.1228  | 0.44734 | 0.97484 | 0.92984 | 0.055027 | 0.19477  | 0.98872  | 0.10112 | 0.085316 | 0.99865  | 1        | 1.0683  | 0.11497 | 0.57384 | 0.97162 | 0.89868 | 0.03809  | 0.0036527 | 1       |
| 6 | 138076706 | rs182155174 | 2 | 0.8666   | 1.175  | 0.9506 | --      | --      | --      | 1.099   | 1.4439  | 0.96806  | 0.43531  | --       | --      | --       | --       | --       | --      | --      | --      | 1.2389  | 1.2856  | 0.62484  | 0.62332   | --      |
| 6 | 138077090 | rs1338480   | 5 | 0.006892 | 0.9278 | 0.4552 | 0.87236 | 0.12234 | 0.43131 | 0.98267 | 0.93513 | 0.054947 | 0.23306  | 0.99234  | 1.0147  | 0.085222 | 0.97062  | 0.99863  | 1.0719  | 0.1147  | 0.55365 | 0.97698 | 0.89889 | 0.038115 | 0.003459  | 0.99632 |
| 6 | 138077311 | rs117598111 | 3 | 0.7816   | 0.8881 | 0.9204 | --      | --      | --      | 0.97973 | 0.76077 | 0.96004  | 0.41934  | 1.3585   | 1.3535  | 0.59028  | 0.43602  | --       | --      | --      | --      | 0.7829  | 0.56031 | 0.56586  | 0.39688   | --      |
| 6 | 138077323 | rs9389534   | 5 | 0.006931 | 0.9278 | 0.4406 | 0.87281 | 0.12257 | 0.43127 | 0.97754 | 0.93361 | 0.054996 | 0.22057  | 0.99117  | 1.0153  | 0.085233 | 0.96548  | 0.99839  | 1.0756  | 0.11481 | 0.53321 | 0.97214 | 0.89914 | 0.03812  | 0.0036003 | 0.99583 |
| 6 | 138077547 | rs184930681 | 4 | 0.032    | 0.415  | 0.7047 | 1.3604  | 1.4393  | 0.6796  | 0.37359 | 0.59997 | 0.8309   | 0.30118  | 0.60079  | 0.50205 | 1.1103   | 0.38557  | 0.85834  | --      | --      | --      | --      | 0.2799  | 0.55877  | 0.020943  | 0.7006  |
| 6 |           |             |   |          |        |        |         |         |         |         |         |          |          |          |         |          |          |          |         |         |         |         |         |          |           |         |

|   |           |                  |   |          |        |        |         |          |          |         |          |          |          |          |          |          |          |         |          |         |         |         |          |           |           |         |
|---|-----------|------------------|---|----------|--------|--------|---------|----------|----------|---------|----------|----------|----------|----------|----------|----------|----------|---------|----------|---------|---------|---------|----------|-----------|-----------|---------|
| 6 | 138083965 | rs77271426       | 5 | 0.8313   | 0.9867 | 0.2478 | 1.4961  | 0.21632  | 0.035459 | 0.94291 | 0.97069  | 0.096048 | 0.70113  | 0.96898  | 0.96888  | 0.14236  | 0.86424  | 0.96925 | 0.76714  | 0.19521 | 0.16922 | 0.95728 | 0.9836   | 0.067502  | 0.37336   | 0.95771 |
| 6 | 138084343 | rs9484088        | 3 | 0.08507  | 0.3247 | 0.4405 | 0.4321  | 2.1285   | 0.60994  | 0.60572 | --       | --       | --       | --       | 0.039855 | 1.7637   | 0.001621 | 0.67682 | --       | --      | --      | --      | 0.45585  | 0.7452    | 0.13445   | 0.47634 |
| 6 | 138084544 | rs138387703      | 4 | 0.6776   | 0.8966 | 0.1576 | 1.4317  | 0.9028   | 0.6718   | 0.68764 | 0.59228  | 0.32315  | 0.049978 | 0.79709  | 0.61401  | 0.52025  | 0.18392  | 0.79407 | --       | --      | --      | --      | 1.324    | 0.22483   | 0.16343   | 0.75775 |
| 6 | 138085011 | rs147240409      | 4 | 0.6611   | 1.168  | 0.9868 | 1.0321  | 1.4351   | 0.91848  | 0.39206 | 1.1377   | 0.68367  | 0.58565  | 0.33574  | 0.72366  | 1.4664   | 0.34188  | 0.37187 | --       | --      | --      | --      | 1.2521   | 0.45285   | 0.23498   | 0.35697 |
| 6 | 138085196 | rs7753364        | 5 | 0.007108 | 0.9281 | 0.4587 | 0.87933 | 0.12207  | 0.47981  | 0.99099 | 0.93324  | 0.055035 | 0.21783  | 0.98945  | 1.0152   | 0.085183 | 0.96711  | 0.99847 | 1.0734   | 0.11416 | 0.5498  | 0.99095 | 0.89916  | 0.03813   | 0.0036292 | 0.99553 |
| 6 | 138085248 | rs7753394        | 5 | 0.007417 | 0.9284 | 0.4473 | 0.87903 | 0.12206  | 0.48181  | 0.99292 | 0.93588  | 0.055006 | 0.23794  | 0.99109  | 1.0155   | 0.085181 | 0.96411  | 0.99846 | 1.0744   | 0.11414 | 0.54364 | 0.99184 | 0.89848  | 0.03813   | 0.0032763 | 0.99599 |
| 6 | 138085365 | rs7773904        | 5 | 0.007113 | 0.9281 | 0.4605 | 0.88081 | 0.12209  | 0.48821  | 0.99066 | 0.93329  | 0.055036 | 0.21808  | 0.98933  | 1.0152   | 0.085185 | 0.96714  | 0.99844 | 1.0731   | 0.11419 | 0.55125 | 0.99059 | 0.89902  | 0.038133  | 0.0036029 | 0.99536 |
| 6 | 138085455 | rs6570186        | 5 | 0.007508 | 0.9281 | 0.5322 | 0.88225 | 0.12294  | 0.49132  | 0.97009 | 0.939    | 0.055493 | 0.26004  | 0.97214  | 1.0109   | 0.085542 | 0.99694  | 0.99039 | 1.0547   | 0.11481 | 0.65207 | 0.9756  | 0.89873  | 0.038363  | 0.0032272 | 0.9828  |
| 6 | 138085527 | rs144786332      | 3 | 0.6318   | 1.2563 | 0.8992 | 1.1426  | 1.7891   | 0.82311  | 0.52904 | 1.4887   | 0.60825  | 0.25297  | 0.58357  | --       | --       | --       | --      | --       | --      | --      | --      | 0.92392  | 0.84614   | 0.83546   | 0.44442 |
| 6 | 138085619 | chr6:138085619:D | 4 | 0.1729   | 0.4746 | 0.5032 | 0.52153 | 2.229    | 0.65518  | 0.57659 | 0.91239  | 1.1097   | 0.85052  | 0.44636  | 0.039814 | 1.7656   | 0.001584 | 0.67616 | --       | --      | --      | --      | 0.53615  | 0.70526   | 0.18371   | 0.47829 |
| 6 | 138085739 | rs117060742      | 5 | 0.6676   | 1.0532 | 0.2381 | 2.38    | 0.3889   | 0.011016 | 0.88699 | 1.0856   | 0.18101  | 0.68253  | 0.88098  | 0.92573  | 0.32823  | 0.65088  | 0.88537 | 0.83765  | 0.32628 | 0.55698 | 0.86639 | 0.96305  | 0.12491   | 0.31774   | 0.88173 |
| 6 | 138086139 | rs1111800        | 5 | 0.007021 | 0.9279 | 0.4618 | 0.87863 | 0.12215  | 0.47096  | 0.98874 | 0.93386  | 0.055111 | 0.22158  | 0.98644  | 1.0154   | 0.085193 | 0.96565  | 0.99799 | 1.0713   | 0.11431 | 0.56084 | 0.99057 | 0.89887  | 0.038137  | 0.0053339 | 0.99542 |
| 6 | 138086230 | rs1111799        | 5 | 0.007431 | 0.9284 | 0.4376 | 0.87616 | 0.122185 | 0.4535   | 0.99101 | 0.93858  | 0.055115 | 0.25936  | 0.98908  | 1.0154   | 0.08521  | 0.96509  | 0.99824 | 1.0737   | 0.11419 | 0.54775 | 0.98913 | 0.89761  | 0.038145  | 0.0030469 | 0.99568 |
| 6 | 138086259 | rs182630971      | 2 | 0.67     | 0.8209 | 0.7742 | 1.2364  | 1.5009   | 0.50199  | 0.47848 | --       | --       | --       | --       | --       | --       | --       | --      | --       | --      | --      | --      | 0.78633  | 0.4868    | 0.24108   | 0.38429 |
| 6 | 138086303 | rs35897514       | 5 | 0.9623   | 1.0021 | 0.6539 | 1.0622  | 0.21267  | 0.64678  | 0.86686 | 1.0603   | 0.085516 | 0.45831  | 0.99028  | 0.82805  | 0.14764  | 0.10634  | 0.98674 | 0.90935  | 0.1946  | 0.62066 | 0.95706 | 0.10103  | 0.059483  | 0.87079   | 0.97537 |
| 6 | 138086320 | rs144389052      | 2 | 0.2716   | 2.0788 | 0.5904 | --      | --       | --       | --      | --       | --       | --       | --       | 0.68931  | 2.1559   | 0.66593  | 0.70422 | --       | --      | --      | --      | 2.3353   | 0.69987   | 0.32974   | 0.69467 |
| 6 | 138086378 | rs188003477      | 2 | 0.8497   | 0.8152 | 0.8751 | --      | --       | --       | --      | --       | --       | 0.72715  | 1.3001   | 0.7081   | 0.66342  | --       | --      | --       | --      | --      | --      | 1.0478   | 1.926     | 0.92333   | 0.34452 |
| 6 | 138086635 | rs187387034      | 4 | 0.6921   | 1.1339 | 0.9777 | 1.1585  | 1.59     | 0.37142  | 0.31692 | 1.0783   | 0.57208  | 0.68616  | 0.33602  | 0.83377  | 0.85583  | 0.6629   | 0.38186 | --       | --      | --      | --      | 1.2663   | 0.44217   | 0.050137  | 0.32825 |
| 6 | 138086988 | rs140398407      | 5 | 0.8602   | 0.9765 | 0.812  | 1.3697  | 0.76852  | 0.50593  | 0.76801 | 0.89522  | 0.28126  | 0.70286  | 0.96161  | 1.1746   | 0.31155  | 0.58367  | 0.98172 | 1.6192   | 0.61526 | 0.36609 | 0.94211 | 0.8854   | 0.19003   | 0.74948   | 0.95645 |
| 6 | 138087086 | rs192172069      | 2 | 0.7889   | 1.1811 | 0.1542 | --      | --       | --       | --      | 0.58927  | 0.68762  | 0.16981  | 0.54236  | --       | --       | --       | --      | --       | --      | --      | --      | 2.0598   | 0.54603   | 0.12625   | 0.60003 |
| 6 | 138087506 | rs62434177       | 5 | 0.139    | 0.8571 | 0.8807 | 0.93346 | 0.50175  | 0.88209  | 0.55502 | 0.79744  | 0.21292  | 0.12173  | 0.60947  | 0.95825  | 0.26246  | 0.84641  | 0.74274 | 1.4119   | 0.5643  | 0.22099 | 0.51618 | 0.82349  | 0.1438    | 0.070003  | 0.65411 |
| 6 | 138087512 | rs74521120       | 5 | 0.511    | 1.0285 | 0.3097 | 0.87578 | 0.15579  | 0.35308  | 0.98972 | 0.9916   | 0.071903 | 0.91398  | 0.98641  | 0.90919  | 0.11125  | 0.50425  | 0.99432 | 1.1807   | 0.15289 | 0.2443  | 0.96997 | 1.0919   | 0.049037  | 0.15086   | 0.99092 |
| 6 | 138087535 | rs145089760      | 2 | 0.7774   | 0.7626 | 0.7412 | 1.558   | 2.3663   | 0.50278  | 0.48652 | --       | --       | --       | --       | --       | --       | --       | --      | --       | --      | --      | --      | 0.66272  | 1.0488    | 0.49168   | 0.33188 |
| 6 | 138088327 | rs141412160      | 4 | 0.7675   | 0.875  | 0.973  | 0.51022 | 1.5413   | 0.39227  | 0.41647 | --       | --       | --       | --       | 1.1904   | 1.1613   | 0.738    | 0.44032 | 0.73502  | 1.0644  | 0.6389  | 0.58874 | 0.92301  | 0.59102   | 0.86131   | 0.51591 |
| 6 | 138088331 | rs184244719      | 4 | 0.957    | 0.9653 | 0.1048 | 0.86387 | 2.8354   | 0.99833  | 0.45807 | 0.37802  | 0.65859  | 0.093119 | 0.81198  | 5.4219   | 0.87805  | 0.057711 | 0.75037 | --       | --      | --      | --      | 0.63053  | 0.68871   | 0.51233   | 0.63386 |
| 6 | 138088353 | rs28493886       | 3 | 0.7774   | 0.8769 | 0.9265 | --      | --       | --       | --      | 0.95099  | 0.7984   | 0.8913   | 0.67147  | --       | --       | --       | --      | 1.2307   | 1.1753  | 0.735   | 0.6208  | 0.74791  | 0.65365   | 0.58845   | 0.65932 |
| 6 | 138088365 | rs117157061      | 2 | 0.6481   | 0.6788 | 0.776  | --      | --       | --       | --      | 0.75522  | 0.92802  | 0.40347  | 0.34225  | 0.39303  | 2.0999   | 0.19501  | 0.33746 | --       | --      | --      | --      | --       | --        | --        | --      |
| 6 | 138088454 | rs139401850      | 4 | 0.3787   | 1.4104 | 0.3316 | 1.3047  | 2.2153   | 0.65997  | 0.5865  | 1.2514   | 0.59993  | 0.63091  | 0.79623  | 16.812   | 1.4148   | 0.238    | 0.84018 | --       | --      | --      | --      | 1.101    | 0.43033   | 0.37208   | 0.81198 |
| 6 | 138089015 | rs143227671      | 2 | 0.1078   | 0.3061 | 0.2905 | --      | --       | --       | --      | 0.059822 | 1.7333   | 0.079354 | 0.5669   | 0.42659  | 0.67016  | 0.13543  | 0.93058 | --       | --      | --      | --      | --       | --        | --        | --      |
| 6 | 138089088 | rs113190354      | 3 | 0.3638   | 1.444  | 0.7168 | 2.7577  | 1.9069   | 0.15097  | 0.53282 | 1.7052   | 0.49231  | 0.034119 | 0.52011  | --       | --       | --       | --      | --       | --      | --      | --      | 0.87101  | 0.76489   | 0.33202   | 0.58281 |
| 6 | 138089263 | rs142506464      | 2 | 0.6505   | 1.8754 | 0.9425 | 2.0165  | 1.7134   | 0.53859  | 0.79399 | --       | --       | --       | --       | --       | --       | --       | --      | --       | --      | --      | --      | 1.6332   | 2.3662    | 0.13719   | 0.47766 |
| 6 | 138089530 | rs117501836      | 5 | 0.1775   | 1.1667 | 0.9395 | 1.3241  | 0.51511  | 0.23193  | 0.74918 | 1.1425   | 0.22083  | 0.44179  | 0.83242  | 0.92165  | 0.32728  | 0.74536  | 0.86091 | 1.5835   | 0.83885 | 0.14656 | 0.431   | 1.2161   | 0.15529   | 0.087561  | 0.80585 |
| 6 | 138089722 | rs6570187        | 2 | 0.3848   | 0.1657 | 0.086  | --      | --       | --       | --      | --       | --       | --       | 0.012864 | 2.2136   | 0.06393  | 0.80673  | --      | --       | --      | --      | 0.88345 | 1.0809   | 0.71773   | 0.47109   |         |
| 6 | 138090140 | rs12055552       | 5 | 0.006177 | 0.9268 | 0.4358 | 0.86289 | 0.40011  | 1        | 0.93672 | 0.055089 | 0.24429  | 0.99056  | 1.013    | 0.28509  | 0.98513  | 1        | 1.071   | 0.11409  | 0.563   | 1       | 0.89755 | 0.038131 | 0.0029698 | 1         |         |
| 6 | 138090237 | rs191910563      | 4 | 0.9578   | 0.9811 | 0.9189 | --      | --       | --       | --      | 1.1001   | 0.61973  | 0.82911  | 0.7989   | 0.42679  | 1.2468   | 0.24174  | 0.6475  | 1.1813   | 1.6127  | 0.86004 | 0.77943 | 1.0216   | 0.49313   | 0.82916   | 0.76544 |
| 6 | 138090675 | rs143643332      | 2 | 0.7365   | 1.6666 | 0.9918 | 1.6882  | 1.9637   | 0.63062  | 0.73155 | --       | --       | --       | --       | --       | --       | --       | --      | --       | --      | --      | --      | 1.6351   | 2.3934    | 0.11743   | 0.44783 |
| 6 | 138090692 | rs148172526      | 2 | 0.7365   | 1.6666 | 0.9918 | 1.6882  | 1.9637   | 0.63062  | 0.73155 | --       | --       | --       | --       | --       | --       | --       | --      | --       | --      | --      | --      | 1.6351   | 2.3934    | 0.11743   | 0.44783 |
| 6 | 138090849 | rs182507491      | 4 | 0.5972   | 1.2055 | 0.9653 | 1.45    | 1.4764   | 0.53942  | 0.56813 | 1.4693   | 0.55165  | 0.3305   | 0.71715  | 1.0164   | 0.82598  | 0.93073  | 0.56435 | --       | --      | --      | --      | 1.0128   | 0.59935   | 0.50734   | 0.61331 |
| 6 | 138091056 | rs13217946       | 5 | 0.9173   | 1.0046 | 0.6342 | 1.0622  | 0.21289  | 0.64546  | 0.86648 | 1.0698   | 0.08494  | 0.40884  | 1        | 0.82945  | 0.14765  | 0.10874  | 0.98666 | 0.9069   | 0.19464 | 0.61074 | 0.95789 | 1.0109   | 0.059478  | 0.8796    | 0.97606 |
| 6 | 138091085 | rs146126055      | 4 | 0.1592   | 0.5125 | 0.0399 | --      | --       | --       | --      | 0.85553  | 0.45242  | 0.67838  | 0.79064  | 0.50037  | 1.1216   | 0.29965  | 0.77066 | 0.083876 | 0.78115 | 0.08408 | 0.84098 | 0.89684  | 0.30597   | 0.5963    | 0.84675 |
| 6 | 138092141 | rs34854540       | 5 | 0.007345 | 0.9284 | 0.4386 | 0.87985 | 0.12181  | 0.49115  | 0.99748 | 0.93674  | 0.055052 | 0.2449   | 0.98992  | 1.0165   | 0.085152 | 0.9551   | 0.99908 | 1.0742   | 0.11407 | 0.54556 | 0.99571 | 0.89773  | 0.038123  | 0.0030336 | 0.99738 |
| 6 | 138092422 | rs9402920        | 5 | 0.838    | 0.9813 | 0.9862 | 1.0654  | 0.41746  | 0.79562  | 0.63065 | 0.96037  | 1.18786  | 0.83903  | 0.92442  | 0.9225   | 0.22533  | 0.65679  | 0.91087 | 1.1775   | 0.38399 | 0.59854 | 0.86802 | 0.98331  | 0.13342   | 0.78383   | 0.85384 |
| 6 | 138092590 | chr6:138092590:D | 5 | 0.9695   | 1.0033 | 0.8909 | 0.8407  | 0.33394  | 0.29137  | 0.66439 | 0.92873  | 0.16958  | 0.46571  | 0.65458  | 0.89367  | 0.26468  | 0.63053  | 0.66821 | 1.0604   | 0.34406 | 0.78286 | 0.58055 | 1.0829   | 0.11835   | 0.33804   | 0.64848 |
| 6 | 138093317 | rs6570188        | 5 | 0.006702 | 0.9275 | 0.5195 | 0.88352 | 0.12223  | 0.501    | 0.99035 | 0.93172  | 0.055125 | 0.20768  | 0.98718  | 1.011    | 0.085276 | 0.9666   | 0.99821 | 1.0633   | 0       |         |         |          |           |           |         |

|   |           |                  |   |         |        |        |         |         |          |         |         |          |           |          |         |          |          |         |         |         |         |         |         |          |           |         |
|---|-----------|------------------|---|---------|--------|--------|---------|---------|----------|---------|---------|----------|-----------|----------|---------|----------|----------|---------|---------|---------|---------|---------|---------|----------|-----------|---------|
| 6 | 138102470 | rs9494865        | 3 | 0.7451  | 0.8599 | 0.9163 | --      | --      | --       | 0.94216 | 0.79951 | 0.88124  | 0.68377   | --       | --      | --       | --       | 1.2258  | 1.1678  | 0.737   | 0.61823 | 0.72371 | 0.65402 | 0.52607  | 0.66861   |         |
| 6 | 138102476 | rs10782267       | 5 | 0.5851  | 1.0168 | 0.7008 | 0.98069 | 0.13648 | 0.78436  | 0.95474 | 0.98916 | 0.061812 | 0.90292   | 0.98918  | 0.91761 | 0.094578 | 0.48727  | 1       | 1.0903  | 0.13862 | 0.4797  | 0.91449 | 0.10465 | 0.041124 | 0.34407   |         |
| 6 | 138102576 | rs79493603       | 5 | 0.8509  | 0.975  | 0.8248 | 1.3572  | 0.76419 | 0.52414  | 0.77465 | 0.89631 | 0.28037  | 0.70486   | 0.95636  | 1.1704  | 0.31187  | 0.592    | 0.98264 | 1.5887  | 0.61447 | 0.38277 | 0.93707 | 0.0885  | 0.19049  | 0.74114   | 0.9561  |
| 6 | 138103164 | rs79290201       | 5 | 0.2758  | 1.1658 | 0.3739 | 1.0785  | 0.48363 | 0.7327   | 0.74413 | 0.97439 | 0.26879  | 0.92331   | 0.70795  | 0.58784 | 0.47308  | 0.083647 | 0.71897 | 0.94855 | 0.69766 | 0.90165 | 0.58478 | 1.4501  | 0.1719   | 0.02608   | 0.7252  |
| 6 | 138103353 | rs112893452      | 3 | 0.9713  | 0.9753 | 0.8513 | 1.5756  | 1.5549  | 0.62347  | 0.51896 | 0.67734 | 0.94953  | 0.25783   | 0.37577  | --      | --       | --       | --      | --      | --      | --      | --      | 1.435   | 1.3696   | 0.048632  | 0.32527 |
| 6 | 138103400 | chr6:138103400:1 | 5 | 0.446   | 1.2683 | 0.5456 | 1.0564  | 2.0201  | 0.93047  | 0.51263 | 1.2401  | 0.58725  | 0.6       | 0.71482  | 9.0004  | 1.1795   | 0.16108  | 0.78236 | 1.411   | 1.5768  | 0.61545 | 0.43113 | 1.0147  | 0.40784  | 0.044821  | 0.71507 |
| 6 | 138103408 | rs111231590      | 5 | 0.6295  | 0.9783 | 0.8792 | 1.1777  | 0.22412 | 0.40594  | 0.88042 | 1.0011  | 0.090733 | 0.92508   | 0.97093  | 0.96825 | 0.13886  | 0.87833  | 0.97967 | 0.83894 | 0.24368 | 0.37301 | 0.80161 | 0.96648 | 0.060261 | 0.74273   | 0.97456 |
| 6 | 138103791 | rs9494866        | 5 | 0.7982  | 0.891  | 0.9177 | 1.2022  | 1.2517  | 0.99882  | 0.43334 | 0.61808 | 0.84976  | 1.02405   | 0.37078  | 0.39108 | 1.5257   | 0.25787  | 0.61928 | 1.1649  | 1.636   | 0.85649 | 0.42883 | 1.2126  | 0.69295  | 0.27705   | 0.45252 |
| 6 | 138104100 | rs190649398      | 2 | 0.5432  | 0.5922 | 0.5588 | --      | --      | --       | --      | 1.2808  | 1.5759   | 0.5616    | 0.31196  | --      | --       | --       | --      | --      | --      | --      | --      | 0.42617 | 1.0292   | 0.19964   | 0.31166 |
| 6 | 138104187 | rs76295066       | 4 | 0.04871 | 0.656  | 0.5473 | 1.0502  | 1.0031  | 0.74194  | 0.75121 | 1.0627  | 0.43826  | 0.8927    | 0.83291  | 0.69626 | 0.75472  | 0.59115  | 0.8941  | --      | --      | --      | --      | 0.52538 | 0.26826  | 0.094244  | 0.91059 |
| 6 | 138104480 | rs72978793       | 5 | 0.7132  | 0.9645 | 0.8395 | 0.66024 | 0.43801 | 0.24143  | 0.86185 | 0.90859 | 0.19692  | 0.54098   | 0.89004  | 1.1728  | 0.32598  | 0.63068  | 0.906   | 1.1316  | 0.3368  | 0.73394 | 0.87395 | 0.96927 | 0.13579  | 0.68242   | 0.90324 |
| 6 | 138104861 | rs1416172        | 5 | 0.02621 | 0.8834 | 0.2086 | 0.97839 | 0.18076 | 0.90552  | 0.96951 | 0.80346 | 0.080783 | 0.0057728 | 0.97733  | 0.92313 | 0.1211   | 0.51128  | 0.99054 | 1.191   | 0.16005 | 0.32101 | 0.97967 | 0.83842 | 0.05744  | 0.0001729 | 0.98249 |
| 6 | 138105005 | rs146789170      | 4 | 0.03776 | 0.5601 | 0.9579 | 1.0462  | 1.2106  | 0.91228  | 0.40381 | 0.53183 | 0.55405  | 0.095664  | 0.67035  | 0.47427 | 0.88046  | 0.2362   | 0.84736 | --      | --      | --      | --      | 0.55701 | 0.36229  | 0.059792  | 0.74517 |
| 6 | 138105017 | rs192177108      | 3 | 0.6713  | 1.4216 | 0.9633 | 1.2999  | 1.7253  | 0.5706   | 0.40497 | 1.8719  | 1.3264   | 0.17024   | 0.33127  | --      | --       | --       | --      | --      | --      | --      | --      | 1.1303  | 1.3471   | 0.62685   | 0.30573 |
| 6 | 138105374 | rs184785871      | 5 | 0.6666  | 1.1208 | 0.3405 | 1.0689  | 1.3025  | 0.9      | 0.63298 | 0.60405 | 0.41858  | 0.15801   | 0.82761  | 0.5627  | 1.1021   | 0.41529  | 0.83908 | 1.8173  | 1.051   | 0.43549 | 0.75141 | 1.655   | 0.29294  | 0.092478  | 0.98599 |
| 6 | 138105782 | rs12200698       | 5 | 0.5506  | 1.0185 | 0.7012 | 0.98482 | 0.13659 | 0.81877  | 0.95297 | 0.99068 | 0.061959 | 0.92183   | 0.98793  | 0.91771 | 0.095101 | 0.4881   | 0.99215 | 1.0889  | 0.13939 | 0.48531 | 0.91003 | 1.0486  | 0.041298 | 0.32442   | 0.98778 |
| 6 | 138105938 | rs115689602      | 4 | 0.1316  | 0.5275 | 0.0082 | 1.0468  | 1.4105  | 0.85919  | 0.54781 | 1.6398  | 0.70443  | 0.33035   | 0.62592  | --      | --       | --       | --      | 257.44  | 1.3697  | 0.03439 | 0.79341 | 2.7481  | 1.1233   | 0.0006612 | 0.51088 |
| 6 | 138106080 | rs74528247       | 5 | 0.7959  | 0.9617 | 0.7457 | 2.1441  | 0.76305 | 0.1851   | 0.69875 | 0.84524 | 0.28692  | 0.50911   | 0.87333  | 1.444   | 0.53322  | 0.43148  | 0.81927 | 0.90301 | 0.63608 | 0.85332 | 0.79451 | 0.9194  | 0.20385  | 0.71989   | 0.87635 |
| 6 | 138106332 | chr6:138106332:D | 5 | 0.3886  | 1.0446 | 0.6603 | 1.4221  | 0.22938 | 0.016724 | 0.6254  | 0.98154 | 0.099977 | 0.7683    | 0.69135  | 1.0275  | 0.15718  | 0.82331  | 0.704   | 0.96251 | 0.20383 | 0.74766 | 0.64817 | 1.0599  | 0.069542 | 0.53415   | 0.6925  |
| 6 | 138106334 | rs6917692        | 5 | 0.01615 | 0.8759 | 0.2173 | 0.97697 | 0.181   | 0.91109  | 0.97435 | 0.79417 | 0.080701 | 0.0039049 | 0.98085  | 0.91399 | 0.12134  | 0.46112  | 0.9912  | 1.1743  | 0.19593 | 0.3632  | 0.97916 | 0.83559 | 0.057416 | 0.0001355 | 0.98428 |
| 6 | 138106340 | chr6:138106340:D | 5 | 0.88    | 0.9901 | 0.2309 | 1.5613  | 0.22256 | 0.020485 | 0.85442 | 0.97547 | 0.098357 | 0.72914   | 0.88936  | 0.9746  | 0.14891  | 0.85394  | 0.88906 | 0.78611 | 0.20042 | 0.1794  | 0.85764 | 0.97182 | 0.069054 | 0.34416   | 0.88536 |
| 6 | 138106763 | rs189356561      | 3 | 0.9703  | 0.9897 | 0.956  | --      | --      | --       | --      | 0.92477 | 0.50823  | 0.87566   | 0.83149  | 0.87846 | 0.6734   | 0.77899  | 0.76372 | --      | --      | --      | --      | 1.0695  | 0.38419  | 0.93129   | 0.78171 |
| 6 | 138106924 | rs184020691      | 4 | 0.791   | 0.902  | 0.878  | 1.9035  | 2.0369  | 0.28818  | 0.51849 | 1.2104  | 0.63491  | 0.66585   | 0.69941  | 0.29906 | 2.595    | 0.02093  | 0.38452 | --      | --      | --      | --      | 0.7383  | 0.51813  | 0.098619  | 0.46068 |
| 6 | 138106955 | rs6570189        | 5 | 0.02892 | 0.8804 | 0.1797 | 0.98274 | 0.18178 | 0.89812  | 0.9859  | 0.78856 | 0.080872 | 0.0035006 | 1        | 0.91368 | 0.12137  | 0.46697  | 0.9951  | 1.1964  | 0.16224 | 0.31675 | 0.98426 | 0.8384  | 0.057641 | 0.0002263 | 0.99051 |
| 6 | 138107496 | rs9321631        | 5 | 0.06872 | 0.9375 | 0.2692 | 0.86663 | 0.12467 | 0.40455  | 0.98401 | 0.90309 | 0.055364 | 0.19205   | 0.98311  | 1.0183  | 0.087496 | 0.9918   | 0.99471 | 1.1339  | 0.11729 | 0.28077 | 0.93438 | 0.89609 | 0.038373 | 0.0029681 | 0.99331 |
| 6 | 138107788 | rs182329078      | 3 | 0.5063  | 1.3371 | 0.9981 | 1.2565  | 1.119   | 0.45866  | 0.38295 | 1.3561  | 0.54722  | 0.14733   | 0.36909  | 1.3404  | 0.95607  | 0.40255  | 0.32607 | --      | --      | --      | --      | --      | --       | --        | --      |
| 6 | 138107988 | rs6929596        | 3 | 0.1359  | 0.3648 | 0.5419 | 0.40687 | 2.0854  | 0.59382  | 0.61265 | --      | --       | --        | 0.064851 | 1.7075  | 0.002925 | 0.66484  | --      | --      | --      | --      | --      | 0.51851 | 0.87736  | 0.17281   | 0.46166 |
| 6 | 138107993 | rs6570190        | 5 | 0.02854 | 0.8798 | 0.1786 | 0.98054 | 0.18119 | 0.90952  | 0.98881 | 0.78973 | 0.081128 | 0.0034844 | 0.99218  | 0.90759 | 0.12161  | 0.44126  | 0.99443 | 1.2028  | 0.16274 | 0.30185 | 0.98447 | 0.8373  | 0.057655 | 0.0002091 | 0.99079 |
| 6 | 138108015 | rs6570191        | 5 | 0.03491 | 0.8842 | 0.1787 | 0.97122 | 0.18073 | 0.93608  | 0.97016 | 0.8033  | 0.080802 | 0.0057036 | 0.97226  | 0.91251 | 0.12171  | 0.46112  | 0.98727 | 1.2188  | 0.16218 | 0.26532 | 0.98284 | 0.83483 | 0.057541 | 0.000135  | 0.98454 |
| 6 | 138109198 | rs1953760        | 5 | 0.05419 | 0.889  | 0.1458 | 0.97524 | 0.18078 | 0.91998  | 0.97805 | 0.7984  | 0.08089  | 0.0047283 | 0.98182  | 0.91229 | 0.12131  | 0.45374  | 0.99378 | 1.2313  | 0.15967 | 0.24139 | 1       | 0.83751 | 0.057467 | 0.0001755 | 0.98934 |
| 6 | 138109344 | rs1953759        | 5 | 0.5844  | 1.0169 | 0.6864 | 0.98368 | 0.13636 | 0.80277  | 0.9569  | 0.98478 | 0.061776 | 0.8468    | 1        | 0.91817 | 0.094998 | 0.49006  | 0.99329 | 1.0874  | 0.13912 | 0.49154 | 0.91217 | 1.0485  | 0.041196 | 0.32207   | 0.99026 |
| 6 | 138109547 | rs9321632        | 5 | 0.02719 | 0.8816 | 0.1933 | 0.97544 | 0.18081 | 0.91949  | 0.97697 | 0.79786 | 0.080709 | 0.004567  | 0.9808   | 0.91283 | 0.12134  | 0.45573  | 0.99279 | 1.1988  | 0.16041 | 0.30942 | 0.98421 | 0.8377  | 0.05748  | 0.0001792 | 0.98864 |
| 6 | 138110263 | rs72980703       | 5 | 0.6035  | 0.9667 | 0.0147 | 0.81636 | 0.15008 | 0.25879  | 0.83249 | 0.89786 | 0.05997  | 0.070652  | 0.99094  | 1.1365  | 0.097402 | 0.18196  | 0.94489 | 1.2507  | 0.12959 | 0.07676 | 0.90371 | 0.87619 | 0.043245 | 0.0004894 | 0.93136 |
| 6 | 138110696 | rs117375959      | 5 | 0.3944  | 0.9002 | 0.9542 | 0.86212 | 0.51639 | 0.90444  | 0.56837 | 0.81118 | 0.2259   | 0.10368   | 0.56901  | 0.82999 | 0.40062  | 0.34987  | 0.55065 | 1.3218  | 0.70571 | 0.30023 | 0.93992 | 0.95493 | 0.17271  | 0.97723   | 0.53001 |
| 6 | 138110810 | rs191800375      | 4 | 0.6257  | 1.1774 | 0.9512 | 2.7851  | 1.5412  | 0.11977  | 0.52994 | 1.2076  | 0.64894  | 0.64381   | 0.64841  | --      | --       | --       | --      | 1.0118  | 1.5207  | 0.96011 | 0.51406 | 1.1058  | 0.41903  | 0.45532   | 0.76223 |
| 6 | 138111135 | rs185275538      | 4 | 0.8065  | 0.8943 | 0.9253 | 0.79007 | 1.8548  | 0.88965  | 0.59483 | 1.1392  | 0.64057  | 0.85372   | 0.63863  | 0.95186 | 1.0461   | 0.97548  | 0.7347  | --      | --      | --      | --      | 0.52984 | 0.92583  | 0.18655   | 0.40088 |
| 6 | 138111376 | rs113303355      | 5 | 0.5545  | 0.9264 | 0.3407 | 0.59811 | 0.56832 | 0.2001   | 0.70628 | 0.72096 | 0.21885  | 0.041034  | 0.72559  | 0.91232 | 0.34727  | 0.82632  | 0.75689 | 0.60217 | 0.64967 | 0.26223 | 0.60451 | 1.1609  | 0.51522  | 0.24231   | 0.76029 |
| 6 | 138111847 | rs185439322      | 4 | NA      | NA     | NA     | --      | --      | --       | --      | 1.8624  | 1.4295   | 0.46975   | 0.59485  | 0.954   | 0.59472  | 0.79151  | 0.92702 | -1      | 1.9891  | 0.30526 | 0.87102 | 1.1457  | 0.77607  | 0.98823   | 0.84638 |
| 6 | 138111920 | rs190151269      | 4 | 0.1984  | 0.5862 | 0.5304 | 1.1331  | 2.1556  | 0.85301  | 0.39882 | 1.1624  | 0.85542  | 0.5684    | 0.51137  | 0.20377 | 0.92423  | 0.01807  | 0.69443 | --      | --      | --      | --      | 0.59501 | 0.57273  | 0.079487  | 0.58047 |
| 6 | 138112024 | rs182833544      | 2 | 0.7699  | 0.6913 | 0.4425 | --      | --      | --       | --      | 0.31812 | 1.6169   | 0.11402   | 0.37537  | 2.3185  | 2.0189   | 0.46862  | 0.50697 | --      | --      | --      | --      | --      | --       | --        | --      |
| 6 | 138112151 | rs186925172      | 4 | 0.5846  | 1.1444 | 0.7383 | 0.90012 | 0.99407 | 0.95713  | 0.81769 | 1.5849  | 0.56508  | 0.28063   | 0.74931  | 2.2551  | 0.86618  | 0.34344  | 0.72306 | --      | --      | --      | --      | 0.98162 | 0.30209  | 0.91826   | 0.80324 |
| 6 | 138112481 | rs12212460       | 5 | 0.5939  | 0.9675 | 0.027  | 0.82882 | 0.14838 | 0.35507  | 0.86028 | 0.89871 | 0.062007 | 0.07765   | 1        | 1.1183  | 0.097943 | 0.25262  | 0.94039 |         |         |         |         |         |          |           |         |

|   |           |             |   |          |        |        |         |         |          |         |         |          |          |          |         |          |          |         |         |         |         |         |          |          |           |         |         |         |
|---|-----------|-------------|---|----------|--------|--------|---------|---------|----------|---------|---------|----------|----------|----------|---------|----------|----------|---------|---------|---------|---------|---------|----------|----------|-----------|---------|---------|---------|
| 6 | 138120541 | rs182526133 | 3 | 0.9783   | 1.004  | 0.9901 | --      | --      | --       | --      | 0.99683 | 0.26124  | 0.99721  | 0.35314  | 1.0656  | 0.44636  | 0.63435  | 0.32002 | --      | --      | --      | --      | 0.99658  | 0.19653  | 0.55385   | 0.3098  |         |         |
| 6 | 138121056 | rs11961920  | 5 | 0.9104   | 0.9951 | 0.8122 | 1.0048  | 0.20564 | 0.97953  | 0.82774 | 1.0443  | 0.08628  | 0.5882   | 0.92065  | 0.85777 | 0.14805  | 0.1921   | 0.91238 | 0.8812  | 0.17418 | 0.45054 | 1       | 1.0062   | 0.059817 | 0.94325   | 0.9153  |         |         |
| 6 | 138121504 | rs80227247  | 5 | 0.2853   | 0.8625 | 0.7813 | 0.90247 | 0.78273 | 0.97081  | 0.74736 | 0.85093 | 0.26108  | 0.45526  | 0.79483  | 1.2676  | 0.41154  | 0.34972  | 0.83599 | 0.45411 | 0.69755 | 0.09915 | 0.61441 | 0.83733  | 0.18913  | 1.3062    | 0.79355 |         |         |
| 6 | 138121791 | rs149936732 | 5 | 0.6936   | 0.8854 | 0.3582 | 1.7548  | 0.93929 | 0.82039  | 0.6096  | 0.9758  | 0.4738   | 0.78128  | 0.78572  | 1.6339  | 1.2959   | 0.57873  | 0.57105 | 0.34492 | 0.55773 | 0.04603 | 0.88441 | 1.5178   | 0.63596  | 0.072721  | 0.481   |         |         |
| 6 | 138121806 | rs147602204 | 3 | 0.8935   | 1.0707 | 0.9148 | --      | --      | --       | --      | --      | --       | --       | --       | 1.9799  | 1.5914   | 0.38455  | 0.30551 | 1.1543  | 1.4497  | 0.8826  | 0.48133 | 0.97496  | 0.57991  | 0.86525   | 0.4256  |         |         |
| 6 | 138121897 | rs147072302 | 5 | 0.8469   | 0.9477 | 0.9852 | 1.0549  | 1.2028  | 0.95294  | 0.3344  | 0.96368 | 0.62112  | 0.86574  | 0.3931   | 0.90188 | 0.48173  | 0.95231  | 0.69883 | 1.1544  | 0.78224 | 0.38252 | 0.48215 | 0.81393  | 0.52199  | 0.21228   | 0.30617 |         |         |
| 6 | 138122091 | rs192161952 | 4 | 0.3591   | 1.4742 | 0.3013 | 1.3439  | 2.2639  | 0.6031   | 0.60997 | 1.2311  | 0.6087   | 0.66862  | 0.81764  | 18.901  | 1.4198   | 0.22828  | 0.82988 | --      | --      | --      | --      | 1.1226   | 0.4378   | 0.33036   | 0.82522 |         |         |
| 6 | 138122262 | rs683122    | 5 | 0.02623  | 0.8854 | 0.2315 | 0.93996 | 1.8591  | 0.91617  | 0.92902 | 0.8278  | 0.082    | 0.01467  | 0.93291  | 0.88379 | 0.12213  | 0.31451  | 0.97041 | 1.2372  | 0.16148 | 1.9954  | 0.9152  | 0.84339  | 0.05837  | 0.0002608 | 0.95736 |         |         |
| 6 | 138122311 | rs112716760 | 2 | 0.5825   | 0.6478 | 0.9212 | 0.55898 | 1.6865  | 0.63415  | 0.37077 | --      | --       | --       | --       | --      | --       | --       | --      | --      | --      | --      | --      | --       | 0.67517  | 0.89389   | 0.473   | 0.3675  |         |
| 6 | 138122584 | rs77289867  | 4 | 0.8543   | 0.9612 | 0.8291 | 2.6424  | 1.4503  | 0.094339 | 0.615   | 0.93576 | 0.42625  | 0.78453  | 0.58881  | 0.57391 | 0.83374  | 0.13628  | 0.60493 | --      | --      | --      | --      | 0.9894   | 0.26581  | 0.66711   | 0.67791 |         |         |
| 6 | 138122785 | rs76005080  | 2 | 0.6255   | 3.5049 | 0.0833 | 44.283  | 2.0571  | 0.2777   | 0.94751 | --      | --       | --       | --       | --      | --       | --       | --      | --      | --      | --      | --      | --       | 0.25947  | 2.139     | 0.41829 | 0.42224 |         |
| 6 | 138123234 | rs62434193  | 5 | 0.2348   | 0.8964 | 0.7828 | 0.53473 | 0.45537 | 1.12309  | 0.7832  | 0.87165 | 0.18736  | 0.37673  | 0.82722  | 0.87539 | 0.27927  | 0.5738   | 0.8812  | 1.1308  | 0.38619 | 0.67921 | 0.97986 | 0.92528  | 0.12449  | 0.47925   | 0.82491 |         |         |
| 6 | 138123449 | rs138447034 | 4 | 0.8517   | 0.9074 | 0.97   | 1.5658  | 1.5114  | 0.5502   | 0.50368 | --      | --       | --       | 0.78139  | 1.638   | 0.74829  | 0.47307  | 0.56175 | 1.4727  | 0.38466 | 0.44383 | 0.92172 | 0.6417   | 0.54925  | 0.348     |         |         |         |
| 6 | 138123522 | rs139507798 | 5 | 0.6775   | 1.0913 | 0.3489 | 1.5674  | 0.90908 | 0.50282  | 0.87195 | 1.4726  | 0.34305  | 0.11091  | 0.7202   | 0.3639  | 0.58637  | 0.006927 | 0.79555 | 1.1251  | 0.8075  | 0.79203 | 0.67525 | 1.135    | 0.26923  | 0.58236   | 0.77841 |         |         |
| 6 | 138123579 | rs80320039  | 5 | 0.7647   | 0.9267 | 0.6919 | 1.1873  | 0.80393 | 0.77875  | 0.548   | 0.97826 | 0.49782  | 0.81773  | 0.56192  | 1.3294  | 0.85498  | 0.6855   | 0.63659 | 0.47647 | 0.5256  | 0.07077 | 0.77032 | 1.2118   | 0.45209  | 0.19865   | 0.44478 |         |         |
| 6 | 138123860 | rs149670541 | 4 | 0.6056   | 1.1111 | 0.7739 | 0.61319 | 0.65883 | 0.38334  | 0.65695 | 1.1605  | 0.48564  | 0.5346   | 0.49208  | 0.71565 | 1.1318   | 0.47638  | 0.38058 | --      | --      | --      | --      | 1.2176   | 0.24473  | 0.84977   | 0.6126  |         |         |
| 6 | 138124408 | rs188837026 | 2 | 0.723    | 0.6416 | 0.4626 | --      | --      | --       | 0.31739 | 1.5766  | 0.095371 | 0.36868  | 2.1335   | 2.0601  | 0.49535  | 0.50668  | --      | --      | --      | --      | --      | --       | --       | --        | --      | --      |         |
| 6 | 138124430 | rs9494867   | 5 | 0.7071   | 0.9839 | 0.8785 | 1.1705  | 0.20147 | 0.37482  | 0.84245 | 0.98007 | 0.80586  | 0.77336  | 0.87889  | 0.89771 | 0.13863  | 0.30579  | 0.93454 | 0.96979 | 0.17261 | 0.87028 | 0.90184 | 0.98905  | 0.058386 | 0.90917   | 0.91182 |         |         |
| 6 | 138124455 | rs147638309 | 5 | 0.5719   | 1.0707 | 0.3753 | 2.6334  | 0.46765 | 0.018597 | 0.87892 | 0.99938 | 0.21565  | 0.99375  | 0.8228   | 0.93059 | 0.39528  | 0.87638  | 0.90687 | 0.84693 | 0.43542 | 0.62047 | 0.85813 | 1.0513   | 0.15955  | 0.96458   | 0.91176 |         |         |
| 6 | 138124546 | rs58273035  | 5 | 0.003092 | 1.1242 | 0.7229 | 1.1134  | 0.17849 | 0.84431  | 0.85552 | 1.1541  | 0.077206 | 0.039406 | 0.89745  | 1.1046  | 0.12124  | 0.42077  | 0.92168 | 0.91137 | 0.15519 | 0.52631 | 0.88244 | 1.1441   | 0.055034 | 0.0013324 | 0.90708 |         |         |
| 6 | 138124465 | rs58858048  | 5 | 0.002726 | 1.1255 | 0.6897 | 1.0669  | 0.17767 | 0.96997  | 0.8759  | 1.1529  | 0.077713 | 0.044666 | 0.90854  | 1.1267  | 0.12077  | 0.33624  | 0.92777 | 0.90837 | 0.15419 | 0.51482 | 0.88271 | 1.1481   | 0.054658 | 0.0013882 | 0.92092 |         |         |
| 6 | 138124495 | rs2575004   | 5 | 0.02643  | 0.9312 | 0.5209 | 0.85591 | 0.14109 | 0.33907  | 0.88126 | 0.94173 | 0.064405 | 0.32619  | 0.91752  | 0.94241 | 0.097115 | 0.51797  | 0.9343  | 1.1496  | 0.132   | 0.23983 | 0.88571 | 0.90994  | 0.044104 | 0.017045  | 0.92145 |         |         |
| 6 | 138124589 | rs142214158 | 2 | 0.6398   | 1.3519 | 0.8446 | --      | --      | --       | --      | 1.127   | 1.1298   | 0.88927  | 0.40546  | --      | --       | --       | --      | --      | --      | --      | --      | --       | --       | 1.4758    | 0.78434 | 0.33378 | 0.40669 |
| 6 | 138124673 | rs151071701 | 5 | 0.6112   | 0.8958 | 0.9529 | 0.80584 | 0.97448 | 0.70282  | 0.44905 | 0.96595 | 0.39977  | 0.87693  | 0.47566  | 1.3407  | 0.90262  | 0.3805   | 0.31187 | 1.3162  | 0.78151 | 0.44331 | 0.47511 | 0.78422  | 0.29926  | 0.402861  | 0.43942 |         |         |
| 6 | 138124804 | rs60315454  | 5 | 0.6696   | 0.985  | 0.6165 | 1.2143  | 0.16245 | 0.13076  | 0.8707  | 0.98784 | 0.071365 | 0.81674  | 0.87134  | 0.92129 | 0.10888  | 0.37205  | 0.92833 | 0.87544 | 0.15097 | 0.31762 | 0.83089 | 0.99026  | 0.048069 | 0.57434   | 0.90819 |         |         |
| 6 | 138124891 | rs78179859  | 5 | 0.3778   | 0.8871 | 0.8027 | 0.66838 | 0.79765 | 0.61333  | 0.66559 | 0.86902 | 0.2529   | 0.46764  | 0.75478  | 1.3362  | 0.39793  | 0.2874   | 0.84856 | 0.56801 | 0.69315 | 0.19828 | 0.59393 | 0.85972  | 0.18716  | 0.13794   | 0.77345 |         |         |
| 6 | 138125048 | rs113851782 | 3 | 0.8651   | 0.9341 | 0.904  | 2.7086  | 2.4053  | 0.004012 | 0.43666 | --      | --       | --       | 0.92598  | 1.4024  | 0.84264  | 0.51105  | --      | --      | --      | --      | --      | --       | 0.90429  | 0.42512   | 0.88972 | 0.60783 |         |
| 6 | 138125059 | rs138683406 | 5 | 0.3589   | 0.8561 | 0.9935 | 1.1681  | 0.98043 | 0.51619  | 0.47173 | 0.79706 | 0.27825  | 0.20213  | 0.62669  | 0.86916 | 0.57126  | 0.65684  | 0.57404 | 0.74577 | 0.768   | 0.46867 | 0.49209 | 0.89885  | 0.24886  | 0.94124   | 0.53759 |         |         |
| 6 | 138125106 | rs77743424  | 4 | 0.6146   | 0.7883 | 0.1004 | 0.06696 | 1.1047  | 0.082485 | 0.54867 | 1.222   | 0.58795  | 0.4666   | 0.46897  | 1.0015  | 0.66826  | 0.90235  | 0.75711 | --      | --      | --      | --      | 1.2208   | 0.46476  | 0.064651  | 0.41676 |         |         |
| 6 | 138125335 | rs1656893   | 5 | 0.07745  | 0.9502 | 0.7222 | 0.91017 | 1.02642 | 0.59939  | 0.95757 | 0.902   | 0.057164 | 0.87979  | 0.94869  | 0.89718 | 0.089196 | 0.20011  | 0.97511 | 1.0681  | 0.12589 | 0.5472  | 0.96073 | 0.93527  | 0.039614 | 0.15221   | 0.96701 |         |         |
| 6 | 138125365 | rs79822893  | 5 | 0.3608   | 0.9473 | 0.6057 | 0.84833 | 0.25578 | 0.61086  | 0.87044 | 0.84326 | 0.11681  | 0.11162  | 0.89831  | 1.1336  | 0.19802  | 0.57656  | 0.91908 | 0.8028  | 0.28213 | 0.34164 | 0.83863 | 0.99458  | 0.079429 | 0.54114   | 0.90667 |         |         |
| 6 | 138125418 | rs66520287  | 5 | 0.4069   | 1.036  | 0.6234 | 1.3272  | 0.19087 | 0.11232  | 0.9135  | 1.0053  | 0.084969 | 0.96761  | 0.94335  | 1.02554 | 0.41067  | 0.96688  | 0.90817 | 0.16925 | 0.56157 | 0.91207 | 1.0303  | 0.059052 | 0.89461  | 0.95366   |         |         |         |
| 6 | 138125829 | rs9385808   | 5 | 0.002877 | 0.8814 | 0.6631 | 0.81722 | 0.18634 | 0.28187  | 0.81218 | 0.91326 | 0.083844 | 0.20771  | 0.8225   | 1.0124  | 0.1321   | 0.81573  | 0.87098 | 0.97419 | 0.18054 | 0.89511 | 0.78239 | 0.84135  | 0.057883 | 0.0002991 | 0.84401 |         |         |
| 6 | 138125831 | rs17066882  | 5 | 0.3229   | 1.0698 | 0.9099 | 1.0113  | 0.29881 | 0.76799  | 0.83513 | 1.0065  | 0.13599  | 0.99664  | 0.88736  | 1.2823  | 0.21034  | 0.26923  | 0.97407 | 1.1014  | 0.2307  | 0.6703  | 0.87082 | 1.06128  | 0.096307 | 0.37247   | 0.96692 |         |         |
| 6 | 138125881 | rs78377363  | 5 | 0.1132   | 0.8593 | 0.7017 | 0.76231 | 0.45038 | 0.40106  | 0.8359  | 0.79173 | 0.20648  | 0.19131  | 0.89063  | 0.89329 | 0.28428  | 0.75703  | 0.95649 | 1.5556  | 0.42878 | 0.25813 | 0.92481 | 0.84313  | 0.12606  | 0.23317   | 0.90291 |         |         |
| 6 | 138126153 | rs73562261  | 5 | 0.2858   | 1.0756 | 0.9051 | 1.0191  | 0.3019  | 0.80279  | 0.82112 | 1.0097  | 0.13576  | 0.97721  | 0.88782  | 1.2922  | 0.20955  | 0.25475  | 0.97458 | 1.1026  | 0.23043 | 0.66608 | 0.87258 | 1.0694   | 0.096357 | 0.33691   | 0.96111 |         |         |
| 6 | 138126278 | rs774628    | 5 | 0.002194 | 0.8902 | 0.9133 | 0.97403 | 0.17979 | 0.94309  | 1       | 0.87656 | 0.073976 | 0.071913 | 0.9504   | 0.84585 | 0.11164  | 0.12359  | 1       | 0.98833 | 0.15206 | 0.96433 | 1       | 0.88928  | 0.052963 | 0.015724  | 1       |         |         |
| 6 | 138126294 | rs73562264  | 5 | 0.2985   | 1.0736 | 0.9164 | 1.0366  | 0.3031  | 0.853    | 0.82985 | 1.0115  | 0.13583  | 0.96202  | 0.89275  | 1.2845  | 0.21049  | 0.2666   | 0.97625 | 1.1046  | 0.23125 | 0.66393 | 0.87749 | 1.064    | 0.096249 | 0.36926   | 0.97296 |         |         |
| 6 | 138126528 | rs187445365 | 3 | 0.6502   | 0.6386 | 0.0594 | --      | --      | --       | 1.2408  | 0.91514 | 0.70596  | 0.65388  | 0.009193 | 2.904   | 0.13472  | 0.89126  | --      | --      | --      | --      | --      | --       | 1.589    | 0.57335   | 0.23594 | 0.93713 |         |
| 6 | 138126714 | rs111963488 | 5 | 0.7924   | 0.945  | 0.3088 | 0.65033 | 0.73234 | 0.16845  | 0.6887  | 1.241   | 0.40225  | 0.41994  | 0.66163  | 1.3425  | 0.6083   | 0.70286  | 0.77364 | 0.32304 | 0.57601 | 0.02366 | 0.77658 | 1.0809   | 0.24843  | 0.6255    | 0.83185 |         |         |
| 6 | 138126732 | rs55707616  | 5 | 0.364    | 1.0637 | 0.9065 | 0.99717 | 0.29544 | 0.74251  | 0.8269  | 1.0005  | 0.13529  | 0.96479  | 0.8795   | 1.275   | 0.20809  | 0.27537  | 0.9693  | 1.0862  | 0.22942 | 0.7162  | 0.87079 | 1.0588   | 0.096225 | 0.38619   | 0.95413 |         |         |
| 6 | 138126734 | rs78053033  | 5 | 0.2487   | 0.9319 | 0.4224 | 0.7741  | 0.2656  | 0.403    | 0.89612 | 0.811   | 0.12018  | 0.060335 | 0.       |         |          |          |         |         |         |         |         |          |          |           |         |         |         |

|   |           |                  |   |          |        |        |         |         |          |         |         |          |          |         |          |          |          |         |         |         |         |         |         |          |          |         |
|---|-----------|------------------|---|----------|--------|--------|---------|---------|----------|---------|---------|----------|----------|---------|----------|----------|----------|---------|---------|---------|---------|---------|---------|----------|----------|---------|
| 6 | 138131406 | chr6:138131406:1 | 5 | 0.8517   | 1.0324 | 0.9957 | 1.0937  | 0.80799 | 0.5773   | 0.48135 | 1.069   | 0.29469  | 0.77968  | 0.57201 | 1.1635   | 0.47297  | 0.47768  | 0.53669 | 1.1971  | 1.0029  | 0.62458 | 0.36031 | 0.9588  | 0.25135  | 0.93644  | 0.4759  |
| 6 | 138131411 | rs57947976       | 5 | 0.6635   | 0.9816 | 0.4453 | 1.0518  | 0.18772 | 0.55035  | 0.90844 | 0.89829 | 0.084413 | 0.17925  | 0.92646 | 1.0098   | 0.13483  | 0.9453   | 0.95581 | 0.75948 | 0.19953 | 0.11494 | 0.88486 | 1.0328  | 0.05746  | 0.70595  | 0.93891 |
| 6 | 138131415 | rs113731813      | 5 | 0.5773   | 0.7429 | 0.8183 | 1.4049  | 1.3525  | 0.72498  | 0.73608 | 0.95578 | 1.1799   | 0.76958  | 0.34904 | 2.7479   | 1.8695   | 0.43036  | 0.54673 | 0.98248 | 1.4023  | 0.93137 | 0.62248 | 0.36249 | 0.82837  | 0.069101 | 0.37949 |
| 6 | 138132123 | rs58905141       | 5 | 0.07747  | 0.8508 | 0.6421 | 0.84612 | 0.4139  | 0.48909  | 0.83673 | 0.78139 | 0.19741  | 0.1585   | 0.91381 | 0.80822  | 0.27265  | 0.45771  | 0.9733  | 1.5936  | 0.41516 | 0.23009 | 0.95422 | 0.84175 | 0.12069  | 0.20816  | 0.92518 |
| 6 | 138132130 | rs56402635       | 5 | 0.5776   | 0.9398 | 0.7501 | 0.74536 | 0.47571 | 0.30599  | 0.58993 | 0.86211 | 0.21626  | 0.25439  | 0.62717 | 0.85938  | 0.3412   | 0.40384  | 0.67298 | 1.8079  | 0.55199 | 0.03323 | 0.53375 | 0.9731  | 0.15264  | 0.99205  | 0.62651 |
| 6 | 138132273 | rs183748882      | 2 | 0.8955   | 1.0764 | 0.6397 | --      | --      | --       | --      | 1.5418  | 0.95073  | 0.13229  | 0.30967 | --       | --       | --       | --      | --      | --      | --      | --      | 0.88845 | 0.69486  | 0.91523  | 0.35743 |
| 6 | 138132298 | rs9484094        | 4 | 0.3408   | 0.5888 | 0.2931 | 0.40447 | 1.2176  | 0.22778  | 0.52979 | 0.97583 | 1.105    | 0.91302  | 0.33802 | 0.065508 | 1.3675   | 0.011816 | 0.78355 | --      | --      | --      | --      | 1.0731  | 0.63739  | 0.3186   | 0.54467 |
| 6 | 138132445 | rs9494868        | 5 | 0.4727   | 0.9761 | 0.5457 | 1.0735  | 1.04688 | 0.69998  | 1       | 0.89736 | 0.068052 | 0.10199  | 1       | 1.0286   | 0.1049   | 0.80322  | 1       | 0.88445 | 0.14273 | 0.37908 | 1       | 1.0047  | 0.045698 | 0.68164  | 1       |
| 6 | 138132515 | rs146533340      | 2 | 0.8657   | 1.1262 | 0.6998 | --      | --      | --       | --      | --      | --       | --       | --      | --       | --       | --       | --      | 1.6609  | 1.2286  | 0.64416 | 0.85172 | 0.93212 | 0.85737  | 0.7339   | 0.84577 |
| 6 | 138132516 | rs10499197       | 5 | 0.0702   | 0.8495 | 0.865  | 0.86337 | 0.412   | 0.50853  | 0.83713 | 0.78516 | 0.19725  | 0.16375  | 0.91031 | 0.8079   | 0.27254  | 0.4564   | 0.97298 | 1.1914  | 0.32562 | 0.56882 | 1       | 0.84232 | 0.1206   | 0.21187  | 0.92496 |
| 6 | 138133268 | rs186873145      | 4 | 0.1055   | 2.5586 | 0.2875 | 1.0828  | 1.3945  | 0.88346  | 0.57976 | 1.4755  | 0.7475   | 0.45157  | 0.62148 | --       | --       | --       | --      | 25.354  | 1.3567  | 0.04702 | 0.77178 | 2.4423  | 0.93711  | 0.065376 | 0.60013 |
| 6 | 138133643 | rs183434000      | 3 | 0.9308   | 1.0394 | 0.8809 | --      | --      | --       | 0.75353 | 0.8194  | 0.43176  | 0.42483  | 1.0596  | 0.81079  | 0.77597  | 0.461    | --      | --      | --      | --      | --      | 1.2955  | 0.69988  | 0.64259  | 0.39998 |
| 6 | 138135316 | rs35634011       | 5 | 0.4686   | 1.0383 | 0.7595 | 1.2537  | 0.23379 | 0.2935   | 0.78221 | 0.97218 | 0.10215  | 0.70933  | 0.80029 | 1.0892   | 0.15107  | 0.46181  | 0.83553 | 0.8926  | 0.19674 | 0.51388 | 0.81807 | 1.0642  | 0.072781 | 0.25011  | 0.81016 |
| 6 | 138135636 | rs149765548      | 5 | 0.9194   | 1.0088 | 0.7266 | 1.5083  | 0.42651 | 0.034667 | 0.64048 | 0.96902 | 0.1618   | 0.77427  | 0.66672 | 1.014    | 0.24565  | 0.78038  | 0.65794 | 0.69514 | 0.36566 | 0.16906 | 0.65472 | 1.0398  | 1.12237  | 0.80232  | 0.63658 |
| 6 | 138135722 | rs145882842      | 5 | 0.4645   | 1.031  | 0.4301 | 1.3306  | 1.18395 | 1.13021  | 0.94049 | 1.0046  | 0.083901 | 0.97557  | 0.94552 | 1.1036   | 1.2448   | 0.37608  | 0.97861 | 0.84009 | 0.16689 | 0.29958 | 0.93117 | 1.028   | 0.057638 | 0.8838   | 0.96757 |
| 6 | 138136334 | rs113039123      | 5 | 0.8969   | 1.0117 | 0.7958 | 1.5165  | 0.42919 | 0.27018  | 0.72869 | 0.98731 | 0.17406  | 0.87917  | 0.77328 | 0.89817  | 0.38957  | 0.50793  | 0.73195 | 1.353   | 0.38281 | 0.30335 | 0.76375 | 0.97598 | 0.1178   | 0.48261  | 0.78153 |
| 6 | 138136623 | rs188170437      | 5 | 0.8864   | 0.9725 | 0.9465 | 1.5533  | 1.184   | 0.34435  | 0.5369  | 0.82692 | 0.38291  | 0.52626  | 0.76004 | 1.4081   | 0.60485  | 0.5122   | 0.81343 | 0.82548 | 0.98603 | 0.79203 | 0.68409 | 0.9678  | 0.25906  | 0.92948  | 0.75979 |
| 6 | 138136794 | chr6:138136794:D | 5 | 0.006122 | 0.9014 | 0.9642 | 0.92181 | 1.17607 | 0.68607  | 0.931   | 0.90219 | 0.072751 | 0.14969  | 0.94001 | 0.85026  | 0.11084  | 0.12046  | 0.96269 | 0.98022 | 0.1542  | 0.91454 | 0.93749 | 0.90225 | 0.053263 | 0.014428 | 0.93819 |
| 6 | 138136860 | rs77521611       | 4 | 0.289    | 0.772  | 0.9962 | 0.84596 | 1.2143  | 0.68765  | 0.52508 | 0.81887 | 0.52328  | 0.455    | 0.50744 | 0.83657  | 0.61593  | 0.60857  | 0.69699 | --      | --      | --      | --      | 0.73443 | 0.31918  | 0.062889 | 0.57169 |
| 6 | 138136978 | rs113882132      | 5 | 0.3335   | 0.901  | 0.6328 | 0.6944  | 0.45079 | 0.2686   | 0.623   | 1.0039  | 0.22928  | 0.93781  | 0.6143  | 1.2325   | 0.25552  | 0.51028  | 0.78088 | 1.1345  | 0.36786 | 0.60143 | 0.64076 | 0.77637 | 0.1594   | 0.022378 | 0.60376 |
| 6 | 138137012 | rs77990078       | 5 | 0.08827  | 0.8563 | 0.6792 | 0.89036 | 0.40409 | 0.57215  | 0.84426 | 0.79087 | 0.19652  | 0.17349  | 0.90849 | 0.79781  | 0.27147  | 0.4235   | 0.97458 | 1.5438  | 0.41061 | 0.25725 | 0.94239 | 0.84748 | 0.1202   | 0.19596  | 0.92324 |
| 6 | 138137551 | rs679670         | 5 | 0.1355   | 0.9584 | 0.5594 | 0.90836 | 0.12377 | 0.59026  | 0.99587 | 1.0112  | 0.056088 | 0.82464  | 1       | 0.89058  | 0.087931 | 0.17922  | 1       | 1.0841  | 0.12488 | 0.46658 | 0.98677 | 0.94111 | 0.039002 | 0.17048  | 1       |
| 6 | 138137916 | rs6928876        | 5 | 0.4131   | 1.0348 | 0.5232 | 1.2933  | 0.18464 | 0.15448  | 0.93925 | 0.99346 | 0.084101 | 0.91504  | 0.94234 | 1.1235   | 0.1242   | 0.29962  | 0.98033 | 0.87122 | 0.16566 | 0.4114  | 0.93017 | 1.0354  | 0.057756 | 0.77649  | 0.96824 |
| 6 | 138137922 | rs138711739      | 2 | 0.1661   | 2.5242 | 0.9877 | 2.417   | 2.8992  | 0.28508  | 0.68715 | --      | --       | --       | --      | --       | --       | --       | --      | --      | --      | --      | --      | 2.5304  | 0.68722  | 0.18117  | 0.90005 |
| 6 | 138138482 | rs730503         | 5 | 0.7201   | 1.0236 | 0.2638 | 1.5015  | 0.22858 | 0.041602 | 1       | 0.99762 | 0.10298  | 0.98348  | 0.95784 | 1.0914   | 0.15095  | 0.42822  | 1       | 0.73335 | 0.2275  | 0.17973 | 0.92412 | 1.0088  | 0.068732 | 0.60563  | 1       |
| 6 | 138138705 | rs892999         | 5 | 0.7532   | 1.0215 | 0.2413 | 1.5208  | 0.22974 | 0.035398 | 0.99185 | 0.996   | 0.10308  | 0.97021  | 0.95701 | 1.078    | 0.1532   | 0.48011  | 0.98172 | 0.72442 | 0.2279  | 0.16541 | 0.92528 | 1.0087  | 0.069724 | 0.584    | 0.98271 |
| 6 | 138138835 | rs17066895       | 5 | 0.3298   | 1.0686 | 0.9169 | 1.062   | 0.29334 | 0.91371  | 0.85515 | 1.0039  | 0.13525  | 0.98916  | 0.8893  | 1.2787   | 0.20944  | 0.27074  | 0.96803 | 1.0553  | 0.22849 | 0.8195  | 0.8884  | 1.0649  | 0.096369 | 0.33135  | 0.95584 |
| 6 | 138138855 | rs799419         | 5 | 0.1349   | 0.9583 | 0.577  | 0.91234 | 0.12362 | 0.64859  | 1       | 1.0059  | 0.056334 | 0.89406  | 0.98142 | 0.88804  | 0.087988 | 0.16723  | 1       | 1.0893  | 0.12393 | 0.44314 | 1       | 0.94299 | 0.039025 | 0.18628  | 1       |
| 6 | 138138944 | rs183043265      | 3 | 0.7697   | 1.1111 | 0.4478 | --      | --      | --       | 1.2963  | 0.59831 | 0.55888  | 0.76565  | 7.6908  | 1.7096   | 0.21587  | 0.4898   | --      | --      | --      | --      | --      | 0.87589 | 0.46652  | 0.78854  | 0.63122 |
| 6 | 138138945 | rs79411652       | 5 | 0.0931   | 0.8546 | 0.7595 | 0.74961 | 0.42086 | 0.29374  | 0.8481  | 0.80019 | 0.20358  | 0.1987   | 0.88175 | 0.86443  | 0.2777   | 0.65236  | 0.96244 | 1.4478  | 0.40993 | 0.32611 | 0.92631 | 0.84221 | 0.12352  | 0.18154  | 0.90554 |
| 6 | 138139105 | rs730504         | 5 | 0.7392   | 1.0229 | 0.238  | 1.5223  | 0.23004 | 0.035128 | 0.98692 | 0.99692 | 0.10209  | 0.97833  | 0.96482 | 1.0819   | 0.15341  | 0.46347  | 0.97942 | 0.72253 | 0.22864 | 0.15603 | 0.91128 | 1.0101  | 0.06975  | 0.59522  | 0.98111 |
| 6 | 138139266 | rs139411001      | 4 | 0.1105   | 0.7763 | 0.9917 | 0.86862 | 0.6675  | 0.78123  | 0.54747 | 0.80048 | 0.34541  | 0.20551  | 0.51878 | 0.85162  | 0.49898  | 0.47196  | 0.64077 | --      | --      | --      | --      | 0.74956 | 0.1996   | 0.020017 | 0.60376 |
| 6 | 138139309 | rs2575007        | 5 | 0.1348   | 0.9581 | 0.5932 | 0.91399 | 0.12443 | 0.6592   | 0.98678 | 1.0067  | 0.056537 | 0.88198  | 0.97458 | 0.88702  | 0.082823 | 0.16241  | 0.99238 | 1.0824  | 0.1248  | 0.47494 | 0.98437 | 0.94297 | 0.039189 | 0.1818   | 0.9896  |
| 6 | 138139500 | rs77724896       | 5 | 0.2334   | 0.9249 | 0.3761 | 0.75334 | 0.26696 | 0.34511  | 0.89811 | 0.8093  | 0.12053  | 0.055553 | 0.90991 | 1.0299   | 0.22039  | 0.88956  | 0.92329 | 0.71437 | 0.29259 | 0.1775  | 0.84879 | 1.0183  | 0.081217 | 0.74034  | 0.9313  |
| 6 | 138139624 | chr6:138139624:D | 5 | 0.7588   | 1.0208 | 0.2499 | 1.5088  | 0.23036 | 0.037515 | 0.97421 | 0.9958  | 0.10232  | 0.96887  | 0.95492 | 1.0772   | 0.15401  | 0.4785   | 0.97145 | 0.71985 | 0.22971 | 0.15098 | 0.90644 | 1.0102  | 0.070001 | 0.59255  | 0.97089 |
| 6 | 138139694 | rs610366         | 5 | 0.006048 | 0.9    | 0.9669 | 0.93917 | 1.07662 | 0.85723  | 0.96874 | 0.88901 | 0.073911 | 0.11391  | 0.96573 | 0.85998  | 0.11138  | 0.15995  | 0.98391 | 0.98109 | 0.15513 | 0.92605 | 0.95937 | 0.90254 | 0.054111 | 0.019889 | 0.97227 |
| 6 | 138139846 | rs117728245      | 5 | 0.8863   | 0.9633 | 0.0924 | 0.64635 | 0.69202 | 0.64966  | 0.81282 | 0.62446 | 0.3308   | 0.08893  | 0.8473  | 0.65719  | 0.45915  | 0.29014  | 0.98081 | 3.8756  | 0.66074 | 0.0124  | 0.7997  | 1.1676  | 0.21338  | 0.56076  | 0.87395 |
| 6 | 138140223 | rs76696399       | 2 | 0.7358   | 0.663  | 0.6418 | 0.37269 | 1.737   | 0.33129  | 0.39342 | --      | --       | --       | --      | --       | --       | --       | 1.1578  | 1.7089  | 0.85572 | 0.43259 | --      | --      | --       | --       | --      |
| 6 | 138140349 | rs12528429       | 5 | 0.5525   | 0.9567 | 0.4801 | 0.64063 | 0.33446 | 0.13228  | 0.67015 | 0.84046 | 0.1506   | 0.11613  | 0.72239 | 0.96692  | 0.27418  | 0.65173  | 0.74208 | 0.81691 | 0.32993 | 0.40206 | 0.67937 | 1.059   | 0.097885 | 0.75754  | 0.74706 |
| 6 | 138140389 | chr6:138140389:D | 5 | 0.2021   | 0.9209 | 0.5712 | 0.66667 | 0.30015 | 0.14816  | 0.76104 | 0.81494 | 0.13094  | 0.049563 | 0.79327 | 0.94134  | 0.23024  | 0.51779  | 0.82567 | 0.87022 | 0.30468 | 0.5593  | 0.7419  | 0.99522 | 0.08432  | 0.58006  | 0.83807 |
| 6 | 138140453 | rs186005669      | 5 | 0.6918   | 1.0752 | 0.9698 | 1.4972  | 0.66975 | 0.46287  | 0.55578 | 1.1933  | 0.3633   | 0.38532  | 0.50345 | 0.77758  | 0.94371  | 0.30815  | 0.41444 | 0.92497 | 0.65424 | 0.83753 | 0.4705  | 1.0239  | 0.24542  | 0.95757  | 0.50843 |
| 6 | 138140468 | rs596595         | 5 | 0.03622  | 0.906  | 0.7887 | 1.1529  | 0.22555 | 0        |         |         |          |          |         |          |          |          |         |         |         |         |         |         |          |          |         |

|   |           |                  |   |           |        |        |         |         |          |         |         |          |           |          |         |          |          |         |         |         |         |         |         |          |           |         |
|---|-----------|------------------|---|-----------|--------|--------|---------|---------|----------|---------|---------|----------|-----------|----------|---------|----------|----------|---------|---------|---------|---------|---------|---------|----------|-----------|---------|
| 6 | 138147360 | rs145072353      | 3 | 0.3202    | 0.5659 | 0.6292 | 0.37532 | 1.758   | 0.39956  | 0.48496 | --      | --       | --        | --       | 0.10049 | 2.004    | 8.02E-05 | 0.52751 | --      | --      | --      | --      | 0.71045 | 0.63556  | 0.36177   | 0.47224 |
| 6 | 138147365 | rs671703         | 5 | 0.8226    | 0.9903 | 0.6394 | 1.2369  | 0.19378 | 0.087363 | 0.70843 | 0.95408 | 0.084049 | 0.50467   | 0.76938  | 0.95164 | 0.13924  | 0.6523   | 0.87998 | 0.83981 | 0.1847  | 0.21276 | 0.74529 | 1.0124  | 0.059402 | 0.60297   | 0.75729 |
| 6 | 138147897 | rs77813012       | 3 | 0.7475    | 1.3005 | 0.9612 | 1.7763  | 1.4562  | 0.66609  | 0.84114 | 0.10399 | 1.2242   | 0.93853   | 0.42485  | --      | --       | --       | --      | 1.3082  | 1.6616  | 0.79266 | 0.51913 | --      | --       | --        | --      |
| 6 | 138148071 | rs12526339       | 4 | 0.08085   | 0.7542 | 0.9875 | 0.78219 | 0.65295 | 0.58552  | 0.53962 | 0.72036 | 0.35597  | 0.071663  | 0.51692  | 0.89313 | 0.51355  | 0.57473  | 0.61549 | --      | --      | --      | --      | 0.74294 | 0.20301  | 0.023892  | 0.5796  |
| 6 | 138148617 | rs9494874        | 3 | 0.1582    | 0.4485 | 0.3947 | 0.313   | 1.6853  | 0.40379  | 0.60249 | --      | --       | --        | 0.067618 | 1.5628  | 0.000469 | 0.64427  | --      | --      | --      | --      | 0.65978 | 0.65441 | 0.24441  | 0.49971   |         |
| 6 | 138149206 | rs188547099      | 3 | 0.2611    | 0.4144 | 0.9921 | --      | --      | --       | --      | 0.37999 | 1.3226   | 0.18489   | 0.51043  | 0.49469 | 1.6639   | 0.6213   | 0.51166 | --      | --      | --      | --      | 0.40599 | 1.1998   | 0.25873   | 0.4541  |
| 6 | 138149258 | rs73564203       | 5 | 0.4157    | 1.1217 | 0.1583 | 2.7099  | 0.41256 | 0.025246 | 0.96927 | 1.1913  | 0.18643  | 0.32611   | 0.93133  | 0.73252 | 0.36626  | 0.37138  | 0.96291 | 0.98935 | 0.31826 | 0.96499 | 0.93983 | 1.023   | 0.13092  | 0.79317   | 0.93625 |
| 6 | 138149753 | rs2788288        | 5 | 0.04037   | 0.8979 | 0.7777 | 1.1206  | 0.2502  | 0.49302  | 0.97486 | 0.90267 | 0.089968 | 0.31291   | 0.98286  | 0.88461 | 0.16138  | 0.49     | 0.98737 | 0.73307 | 0.20623 | 0.14796 | 0.97285 | 0.9041  | 0.074088 | 0.22827   | 0.96883 |
| 6 | 138149812 | rs9494875        | 3 | 0.1007    | 0.2597 | 0.2757 | 0.07144 | 1.7581  | 0.4139   | 0.76045 | --      | --       | --        | 0.055226 | 1.7126  | 0.001828 | 0.6638   | --      | --      | --      | --      | 0.62066 | 0.7388  | 0.20546  | 0.49403   |         |
| 6 | 138150035 | rs138319463      | 5 | 0.8236    | 1.037  | 0.1685 | 0.93852 | 0.4102  | 0.92932  | 0.80995 | 1.0239  | 0.22464  | 0.87614   | 0.76389  | 0.61533 | 0.38972  | 0.092365 | 0.78529 | 0.55551 | 0.64657 | 0.17234 | 0.60442 | 1.3905  | 0.13034  | 0.038     | 0.81619 |
| 6 | 138150235 | rs182065440      | 5 | 0.7072    | 1.1319 | 0.2648 | 2.2816  | 1.784   | 0.45371  | 0.59981 | 0.55722 | 0.46587  | 0.16267   | 0.87361  | 0.52075 | 1.0889   | 0.34779  | 0.8504  | 2.0675  | 1.1072  | 0.37643 | 0.77655 | 1.7521  | 0.30156  | 0.064544  | 0.90924 |
| 6 | 138150378 | rs113657227      | 2 | 0.0914    | 0.4299 | 0.9593 | --      | --      | --       | --      | 0.42322 | 0.58791  | 0.067632  | 0.75019  | --      | --       | --       | --      | --      | --      | --      | --      | 0.44805 | 0.95082  | 0.35054   | 0.58536 |
| 6 | 138150434 | rs2788287        | 5 | 0.05132   | 0.897  | 0.1354 | 0.82247 | 0.15691 | 0.21945  | 1       | 0.9749  | 0.071245 | 0.72424   | 1        | 1.0744  | 0.11843  | 0.48768  | 1       | 0.79722 | 0.14432 | 0.14104 | 1       | 0.82838 | 0.050048 | 0.0001684 | 1       |
| 6 | 138150503 | rs191707616      | 2 | 0.4931    | 0.7519 | 0.752  | 1.219   | 1.5849  | 0.50613  | 0.31288 | --      | --       | --        | --       | --      | --       | --       | --      | --      | --      | --      | --      | 0.72546 | 0.43118  | 0.11525   | 0.30623 |
| 6 | 138150539 | rs72980748       | 5 | 0.000147  | 1.1399 | 0.985  | 1.1724  | 0.15196 | 0.38732  | 0.93091 | 1.1544  | 0.066875 | 0.027154  | 0.96161  | 1.1064  | 0.10582  | 0.2965   | 0.95458 | 1.2089  | 0.14071 | 0.17243 | 0.95463 | 1.1285  | 0.048003 | 0.0002591 | 0.94883 |
| 6 | 138150653 | chr6:138150653:I | 5 | 0.4558    | 1.112  | 0.1522 | 2.7533  | 0.41105 | 0.024922 | 0.97864 | 1.1544  | 0.18601  | 0.42349   | 0.93171  | 0.7409  | 0.36689  | 0.39134  | 0.95902 | 0.99881 | 0.31964 | 0.99001 | 0.93617 | 1.0075  | 0.1311   | 0.72237   | 0.92528 |
| 6 | 138150853 | rs72980749       | 5 | 0.001622  | 1.229  | 0.5456 | 1.1466  | 0.28429 | 0.60772  | 0.95492 | 1.2715  | 0.13116  | 0.04966   | 0.94429  | 1.6356  | 0.19388  | 0.010023 | 0.96431 | 1.2888  | 0.26476 | 0.29348 | 0.93327 | 1.1376  | 0.08973  | 0.022249  | 0.95796 |
| 6 | 138151184 | chr6:138151184:I | 5 | 0.0005522 | 1.228  | 0.724  | 1.2222  | 0.26484 | 0.40748  | 0.93461 | 1.2109  | 0.12422  | 0.097907  | 0.94005  | 1.5465  | 0.18699  | 0.019639 | 0.96701 | 1.3799  | 0.25081 | 0.15676 | 0.94197 | 1.1672  | 0.084988 | 0.0090262 | 0.95943 |
| 6 | 138151315 | chr6:138151315:D | 5 | 4.36E-08  | 1.2051 | 0.8054 | 1.0423  | 0.14641 | 0.91243  | 0.98985 | 1.2229  | 0.067632 | 0.0025573 | 0.98318  | 1.2738  | 0.10247  | 0.013319 | 0.99109 | 1.2908  | 0.1409  | 0.06354 | 0.98374 | 1.1914  | 0.047131 | 4.33E-07  | 0.98893 |
| 6 | 138151454 | rs141325790      | 2 | 0.3506    | 0.5654 | 0.9801 | --      | --      | --       | 0.55868 | 0.77483 | 0.23669  | 0.61979   | --       | --      | --       | --       | --      | --      | --      | --      | --      | 0.57651 | 0.99362  | 0.10586   | 0.39874 |
| 6 | 138151551 | rs79205879       | 5 | 0.3313    | 1.223  | 0.4673 | 0.48533 | 0.88712 | 0.37656  | 0.5746  | 1.4661  | 0.38514  | 0.26744   | 0.91291  | 0.34937 | 0.8694   | 0.15521  | 0.90558 | 1.3534  | 0.75902 | 0.64957 | 0.91437 | 1.3755  | 0.28618  | 0.080908  | 0.87285 |
| 6 | 138151988 | rs7773393        | 5 | 0.5398    | 1.0535 | 0.0971 | 1.7565  | 0.22079 | 0.008993 | 0.83099 | 1.0725  | 0.096788 | 0.47453   | 0.93255  | 0.8245  | 0.19455  | 0.19125  | 0.87796 | 1.0247  | 0.18988 | 0.92668 | 0.93982 | 0.97676 | 0.073187 | 0.69757   | 0.87969 |
| 6 | 138152185 | rs141580145      | 2 | 0.8068    | 1.1209 | 0.9106 | 1.3369  | 1.6374  | 0.6985   | 0.32198 | --      | --       | --        | --       | --      | --       | --       | --      | --      | --      | --      | --      | 1.1036  | 0.48693  | 0.75493   | 0.39638 |
| 6 | 138152228 | rs55938753       | 2 | 0.9294    | 0.9295 | 0.7191 | --      | --      | --       | --      | 0.65918 | 1.2622   | 0.44379   | 0.40839  | --      | --       | --       | --      | --      | --      | --      | --      | 1.201   | 1.09     | 0.2532    | 0.34256 |
| 6 | 138152350 | rs148172100      | 2 | 0.854     | 0.8542 | 0.6242 | --      | --      | --       | --      | 0.51533 | 1.3408   | 0.26874   | 0.41857  | --      | --       | --       | --      | --      | --      | --      | --      | 1.2102  | 1.1132   | 0.24016   | 0.34326 |
| 6 | 138152722 | rs182412992      | 5 | 0.2903    | 0.8554 | 0.7552 | 0.43725 | 0.6307  | 0.049086 | 0.45029 | 0.82824 | 0.27857  | 0.16796   | 0.47668  | 0.84573 | 0.50596  | 0.41538  | 0.54013 | 0.58415 | 0.64003 | 0.0734  | 0.45942 | 0.97195 | 0.2037   | 0.6518    | 0.46026 |
| 6 | 138153150 | rs7740811        | 5 | 0.7632    | 0.8933 | 0.5418 | 1.2359  | 1.0721  | 0.71865  | 0.63569 | 2.1533  | 0.74757  | 0.13639   | 0.6354   | 0.11935 | 2.0922   | 0.15976  | 0.72588 | 1.0098  | 1.0542  | 0.95644 | 0.7672  | 0.56881 | 0.54721  | 0.40413   | 0.84724 |
| 6 | 138154056 | rs78323144       | 5 | 0.433     | 1.0843 | 0.3651 | 0.69458 | 0.4245  | 0.58     | 0.92766 | 1.1026  | 0.17653  | 0.52473   | 0.92034  | 1.4885  | 0.26349  | 0.13355  | 0.94407 | 1.813   | 0.4772  | 0.13616 | 0.83648 | 0.97368 | 0.13855  | 0.4486    | 0.90528 |
| 6 | 138154320 | rs139165363      | 2 | 0.8544    | 0.8543 | 0.6268 | --      | --      | --       | --      | 0.51826 | 1.3392   | 0.27154   | 0.41807  | --      | --       | --       | --      | --      | --      | --      | --      | 1.2108  | 1.1188   | 0.2315    | 0.34189 |
| 6 | 138154501 | rs7746779        | 5 | 6.53E-08  | 1.2008 | 0.8598 | 1.0724  | 0.1456  | 0.77772  | 1       | 1.2027  | 0.067779 | 0.0066005 | 1        | 1.2903  | 0.10089  | 0.010384 | 1       | 1.267   | 0.14011 | 0.08754 | 1       | 1.1882  | 0.046709 | 6.12E-07  | 1       |
| 6 | 138154503 | rs78369861       | 4 | 0.9802    | 1.0086 | 0.8684 | 0.49717 | 1.3003  | 0.38782  | 0.43624 | 1.3505  | 0.67622  | 0.26267   | 0.40291  | 0.71727 | 0.75884  | 0.39488  | 0.58089 | --      | --      | --      | --      | 1.1121  | 0.51232  | 0.48252   | 0.51446 |
| 6 | 138154633 | rs59231171       | 2 | 0.9276    | 0.927  | 0.7167 | --      | --      | --       | --      | 0.65851 | 1.2584   | 0.43689   | 0.40385  | --      | --       | --       | --      | --      | --      | --      | --      | 1.2115  | 1.1132   | 0.21797   | 0.3396  |
| 6 | 138155055 | rs112920346      | 5 | 5.18E-05  | 1.168  | 0.8681 | 0.98478 | 0.16555 | 0.78273  | 0.9847  | 1.2055  | 0.075404 | 0.013322  | 0.97923  | 1.159   | 0.11379  | 0.16205  | 0.98824 | 1.1928  | 0.16144 | 0.25691 | 0.97579 | 1.1695  | 0.053349 | 0.000529  | 0.98348 |
| 6 | 138155549 | rs141619364      | 2 | 0.9324    | 0.9313 | 0.7093 | --      | --      | --       | --      | 0.65674 | 1.258    | 0.43416   | 0.40413  | --      | --       | --       | --      | --      | --      | --      | --      | 1.2325  | 1.1267   | 0.20212   | 0.34484 |
| 6 | 138156118 | chr6:138156118:D | 2 | 0.9234    | 0.9226 | 0.7205 | --      | --      | --       | --      | 0.66198 | 1.2503   | 0.40946   | 0.37911  | --      | --       | --       | --      | --      | --      | --      | --      | 1.2098  | 1.1297   | 0.20149   | 0.33324 |
| 6 | 138156122 | rs56232106       | 5 | 5.59E-08  | 1.2067 | 0.8124 | 1.0461  | 0.14769 | 0.86981  | 0.97606 | 1.2284  | 0.068725 | 0.0019243 | 0.96734  | 1.2951  | 0.10374  | 0.007568 | 0.97429 | 1.2454  | 0.14366 | 0.10709 | 0.95863 | 1.1921  | 0.047859 | 3.27E-07  | 0.96254 |
| 6 | 138156126 | rs73774784       | 5 | 0.871     | 1.0202 | 0.9595 | 1.1527  | 0.57795 | 0.68299  | 0.3351  | 0.9605  | 0.23546  | 0.66907   | 0.40373  | 0.85294 | 0.31839  | 0.21813  | 0.51218 | 1.0165  | 0.45642 | 0.91811 | 0.3629  | 1.1074  | 0.181    | 0.10944   | 0.40091 |
| 6 | 138156395 | rs116912387      | 4 | 0.9476    | 0.9624 | 0.9841 | 0.5623  | 1.6067  | 0.54717  | 0.64114 | 1.0814  | 0.98095  | 0.92082   | 0.55723  | --      | --       | --       | --      | 1.3583  | 1.9401  | 0.71999 | 0.47601 | 0.95904 | 0.89212  | 0.69726   | 0.39374 |
| 6 | 138156425 | rs17779870       | 5 | 6.68E-05  | 1.1654 | 0.8679 | 0.97959 | 0.16488 | 0.76573  | 0.98652 | 1.1984  | 0.07566  | 0.016382  | 0.97831  | 1.1642  | 0.11378  | 0.15077  | 0.98826 | 1.1874  | 0.16211 | 0.26911 | 0.97032 | 1.1684  | 0.053335 | 0.000601  | 0.98259 |
| 6 | 138156630 | rs182124058      | 3 | 0.7224    | 1.1966 | 0.5549 | --      | --      | --       | --      | 1.0057  | 1.0152   | 0.99333   | 0.51392  | 0.16247 | 2.0106   | 0.23962  | 0.77519 | --      | --      | --      | --      | 1.529   | 0.60832  | 0.25266   | 0.77958 |
| 6 | 138156724 | rs188048374      | 3 | 0.7119    | 1.3474 | 0.4089 | --      | --      | --       | --      | 4.1666  | 1.3791   | 0.16539   | 0.63537  | 3.0773  | 1.8956   | 0.45764  | 0.66457 | --      | --      | --      | --      | 0.43617 | 1.1704   | 0.25094   | 0.42727 |
| 6 | 138156926 | rs183300859      | 4 | 0.7033    | 1.1704 | 0.9752 | 0.65659 | 1.9135  | 0.68343  | 0.37176 | 1.4932  | 0.75444  | 0.1985    | 0.43385  | 1.1068  | 1.274    | 0.93666  | 0.41609 | --      | --      | --      | --      | 1.0876  | 0.55828  | 0.91618   | 0.41091 |
| 6 | 138157037 | rs9389536        | 5 | 0.9034    | 0.9933 | 0.906  | 0.96988 | 0.22353 | 0.86775  | 0.80073 | 1.0036  | 0.11761  | 0.93559   | 0.77224  | 0.87509 | 0.16203  | 0.37785  | 0.86003 | 0.9038  | 0.23144 | 0.51771 | 0.71343 | 1.0298  | 0.075597 | 0.70333   | 0.83775 |
| 6 | 138157163 | rs141661070      | 2 | 0.903     | 1.1623 | 0.7791 | --      | --      | --       | --      | 0.78838 | 1.8543   | 0.65246   | 0.34562  | --      | --       | --       | --      | --      | --      | --      | --      | 1.5829  |          |           |         |

|   |           |                  |   |           |        |        |         |         |          |         |         |          |           |          |         |          |          |           |         |           |         |         |         |          |           |         |
|---|-----------|------------------|---|-----------|--------|--------|---------|---------|----------|---------|---------|----------|-----------|----------|---------|----------|----------|-----------|---------|-----------|---------|---------|---------|----------|-----------|---------|
| 6 | 138161013 | rs6918329        | 5 | 3.20E-06  | 1.1507 | 0.7752 | 1.2048  | 0.13433 | 0.27721  | 0.94364 | 1.1835  | 0.059569 | 0.0035963 | 1        | 1.1196  | 0.092333 | 0.17403  | 0.95943   | 1.2939  | 0.12039   | 0.03598 | 1       | 1.1205  | 0.041611 | 0.0001085 | 0.9562  |
| 6 | 138161095 | rs150236080      | 2 | 0.9289    | 0.9284 | 0.7207 | --      | --      | --       | --      | 0.66305 | 1.2569   | 0.44692   | 0.40685  | --      | --       | --       | --        | --      | --        | --      | --      | 1.208   | 1.1117   | 0.22323   | 0.33749 |
| 6 | 138161461 | rs79331961       | 2 | 0.9293    | 0.9288 | 0.7213 | --      | --      | --       | --      | 0.66377 | 1.2573   | 0.44791   | 0.40657  | --      | --       | --       | --        | --      | --        | --      | --      | 1.2079  | 1.1119   | 0.22295   | 0.33726 |
| 6 | 138161666 | rs113496608      | 5 | 0.05519   | 0.8347 | 0.6207 | 0.61848 | 0.43332 | 0.19491  | 0.8361  | 0.79264 | 0.20257  | 0.19326   | 0.9127   | 0.84429 | 0.2754   | 0.57084  | 0.95851   | 1.5173  | 0.41443   | 0.27779 | 0.95137 | 0.82459 | 0.12514  | 0.16677   | 0.91586 |
| 6 | 138162293 | chr6:138162293:1 | 2 | 0.9179    | 1.0489 | 0.4795 | --      | --      | --       | --      | 1.4094  | 0.62383  | 0.30189   | 0.50849  | --      | --       | --       | --        | --      | --        | --      | --      | 0.72948 | 0.69166  | 0.1682    | 0.31204 |
| 6 | 138162949 | rs9494881        | 4 | 0.832     | 1.0866 | 0.7453 | 1.3982  | 1.0195  | 0.58463  | 0.63124 | 1.7352  | 0.82569  | 0.27467   | 0.56341  | --      | --       | --       | --        | 1.6766  | 0.96371   | 0.48912 | 0.86522 | 0.68345 | 0.57632  | 0.56024   | 0.83718 |
| 6 | 138163120 | rs191865720      | 5 | 0.7911    | 0.9115 | 0.9774 | 0.88615 | 1.647   | 0.76016  | 0.44551 | 0.92786 | 0.70551  | 0.84113   | 0.49124  | 1.6069  | 1.6546   | 0.59399  | 0.5072    | 1.7927  | 1.3228    | 0.43078 | 0.55363 | 0.80224 | 0.45403  | 0.31441   | 0.62653 |
| 6 | 138163137 | rs146331967      | 2 | 0.853     | 0.8516 | 0.6297 | --      | --      | --       | --      | 0.5214  | 1.3367   | 0.27282   | 0.41616  | --      | --       | --       | --        | --      | --        | --      | --      | 1.2159  | 1.1388   | 0.20896   | 0.337   |
| 6 | 138163160 | rs184297079      | 5 | 0.4846    | 1.3799 | 0.9798 | 3.1516  | 1.7777  | 0.52485  | 0.5187  | 1.587   | 0.73679  | 0.51273   | 0.76503  | 1.4311  | 1.6598   | 0.63701  | 0.329     | 1.3138  | 1.1021    | 0.73763 | 0.79894 | 0.96279 | 0.85564  | 0.86997   | 0.44921 |
| 6 | 138163209 | rs181921258      | 2 | 0.853     | 0.8515 | 0.6296 | --      | --      | --       | --      | 0.5214  | 1.3367   | 0.27282   | 0.41616  | --      | --       | --       | --        | --      | --        | --      | --      | 1.2164  | 1.1398   | 0.20781   | 0.33689 |
| 6 | 138163566 | rs180843107      | 2 | 0.9695    | 0.9557 | 0.7217 | 7.4654  | 2.2322  | 0.10568  | 0.74084 | --      | --       | --        | --       | --      | --       | --       | --        | --      | --        | --      | --      | 0.48299 | 1.1059   | 0.23332   | 0.66598 |
| 6 | 138163637 | rs190239521      | 3 | 0.213     | 0.5445 | 0.763  | 1.5614  | 1.6955  | 0.71525  | 0.43873 | 0.64633 | 0.92293  | 0.32381   | 0.4922   | --      | --       | --       | --        | --      | --        | --      | --      | 0.4404  | 0.61136  | 0.07316   | 0.51899 |
| 6 | 138163754 | rs191884974      | 5 | 0.9697    | 1.0068 | 0.2645 | 1.5072  | 0.83279 | 0.44623  | 0.82598 | 1.226   | 0.26251  | 0.31453   | 0.79611  | 0.41204 | 0.43557  | 0.004102 | 0.8708    | 1.2116  | 0.64399   | 0.66043 | 0.78896 | 1.092   | 1.8095   | 0.74472   | 0.86368 |
| 6 | 138164315 | rs142405502      | 3 | 0.7118    | 1.3225 | 0.6511 | --      | --      | --       | --      | 0.63221 | 1.0999   | 0.38691   | 0.46826  | --      | --       | --       | --        | 2.3189  | 1.9414    | 0.46481 | 0.62226 | 2.6724  | 1.2352   | 0.0039268 | 0.35208 |
| 6 | 138164943 | rs182839913      | 2 | 0.7074    | 1.2529 | 0.9162 | --      | --      | --       | --      | --      | --       | --        | --       | 1.376   | 1.0741   | 0.60699  | 0.56726   | --      | --        | --      | --      | 1.2006  | 0.72447  | 0.52656   | 0.33525 |
| 6 | 138165005 | rs55642441       | 5 | 0.02529   | 0.908  | 0.7492 | 0.85634 | 0.20137 | 0.5091   | 0.84402 | 0.95904 | 0.084938 | 0.59056   | 0.84667  | 1.0313  | 0.13526  | 0.72794  | 0.89879   | 0.87993 | 0.19533   | 0.46817 | 0.7662  | 0.87067 | 0.058446 | 0.0036201 | 0.87748 |
| 6 | 138165169 | rs74341263       | 3 | 0.9784    | 1.0177 | 0.5683 | --      | --      | --       | --      | 1.6873  | 0.87647  | 0.41541   | 0.68368  | --      | --       | --       | --        | 2.0988  | 1.3333    | 0.41992 | 0.79317 | 0.63493 | 0.66543  | 0.47793   | 0.85838 |
| 6 | 138165560 | rs112975146      | 5 | 0.06884   | 0.8471 | 0.6382 | 0.65788 | 0.38927 | 0.2424   | 0.88905 | 0.81142 | 0.2009   | 0.23095   | 0.90285  | 0.81617 | 0.27271  | 0.46156  | 0.94968   | 1.512   | 0.40479   | 0.2639  | 0.94294 | 0.84348 | 0.12008  | 1.2894    | 0.9255  |
| 6 | 138165744 | rs4548024        | 5 | 0.0001351 | 1.1405 | 0.6015 | 0.9993  | 0.14784 | 0.72719  | 0.94102 | 1.1508  | 0.069237 | 0.030206  | 0.95226  | 1.2499  | 0.10151  | 0.019938 | 0.96508   | 1.2992  | 0.14261   | 0.04345 | 0.94441 | 1.1122  | 0.404752 | 0.0001933 | 0.94881 |
| 6 | 138166005 | rs6917064        | 3 | 0.973     | 1.0168 | 0.5686 | --      | --      | --       | --      | 1.6853  | 0.87708  | 0.41687   | 0.68372  | --      | --       | --       | --        | 2.0988  | 1.3334    | 0.41992 | 0.79317 | 0.63451 | 0.66561  | 0.47832   | 0.83718 |
| 6 | 138166024 | rs112497003      | 5 | 0.06032   | 0.8373 | 0.5929 | 0.62012 | 0.43621 | 0.19195  | 0.83281 | 0.78531 | 0.20319  | 0.17554   | 0.90787  | 0.87893 | 0.27626  | 0.69368  | 0.95833   | 1.539   | 0.41306   | 0.25673 | 0.94009 | 0.82322 | 0.12556  | 0.16701   | 0.91407 |
| 6 | 138166068 | rs1836846        | 5 | 3.45E-06  | 1.1508 | 0.7731 | 1.2525  | 1.13483 | 0.1691   | 0.93459 | 1.1772  | 0.059632 | 0.0047205 | 0.98578  | 1.1333  | 0.092451 | 0.13468  | 0.96161   | 1.28    | 0.12194   | 0.04288 | 0.98108 | 1.1183  | 0.041844 | 0.0000953 | 0.95164 |
| 6 | 138166108 | rs6917267        | 3 | 0.9726    | 1.0171 | 0.5689 | --      | --      | --       | --      | 1.6852  | 0.87714  | 0.41709   | 0.68389  | --      | --       | --       | --        | 2.0988  | 1.3334    | 0.41992 | 0.79317 | 0.63474 | 0.66571  | 0.47874   | 0.83734 |
| 6 | 138166287 | rs665812         | 2 | 0.01813   | 0.9077 | 0.7015 | 0.85113 | 0.19193 | 0.49999  | 0.87316 | 0.95737 | 0.808555 | 0.57074   | 0.88435  | 1.036   | 0.12938  | 0.70158  | 0.92898   | 0.88488 | 0.18244   | 0.48537 | 0.80993 | 0.87032 | 0.05566  | 0.0036655 | 0.91363 |
| 6 | 138166290 | rs144213524      | 2 | 0.5598    | 2.9136 | 0.219  | 16.826  | 2.0395  | 0.29364  | 0.856   | --      | --       | --        | --       | --      | --       | --       | --        | --      | --        | --      | --      | 0.42807 | 1.2124   | 0.547     | 0.36198 |
| 6 | 138166351 | rs190555798      | 5 | 0.9978    | 0.9991 | 0.3191 | 0.43865 | 1.6329  | 0.42894  | 0.44655 | 1.0321  | 0.55578  | 0.91807   | 0.64978  | 2.7872  | 0.61008  | 0.068613 | 0.72401   | 0.19941 | 1.7835    | 0.15234 | 0.43917 | 0.72268 | 0.35826  | 0.1953    | 0.64651 |
| 6 | 138166419 | rs7754667        | 5 | 0.5456    | 1.0502 | 0.1307 | 1.7397  | 0.22836 | 0.013142 | 0.83553 | 1.0653  | 0.096987 | 0.52016   | 0.93873  | 0.81926 | 0.1939   | 0.18251  | 0.88062   | 1.039   | 0.19291   | 0.87969 | 0.94162 | 0.98823 | 0.073682 | 0.80642   | 0.88554 |
| 6 | 138166718 | rs79280759       | 2 | 0.7542    | 1.1735 | 0.5563 | --      | --      | --       | --      | 0.71704 | 0.98107  | 0.61244   | 0.6594   | --      | --       | --       | --        | 1.4099  | 1.0999    | 0.87969 | 0.94162 | 0.98823 | 0.073682 | 0.80642   | 0.88554 |
| 6 | 138166873 | rs191447868      | 4 | 0.3399    | 1.1161 | 0.8926 | 0.79204 | 0.50445 | 0.61295  | 0.45856 | 1.1249  | 0.24238  | 0.26174   | 0.46404  | 1.0214  | 0.34029  | 0.8513   | 0.51208   | --      | --        | --      | --      | 1.1653  | 0.14761  | 0.33534   | 0.47232 |
| 6 | 138166878 | rs181721567      | 3 | 0.9673    | 0.98   | 0.7276 | 0.5654  | 1.3685  | 0.4934   | 0.46453 | 0.84256 | 0.63187  | 0.5451    | 0.42971  | 1.8232  | 0.96106  | 1.13037  | 0.32691   | --      | --        | --      | --      | --      | --       | --        | --      |
| 6 | 138166893 | rs73564236       | 5 | 0.6113    | 1.0471 | 0.1261 | 1.9713  | 0.26555 | 0.006215 | 0.86932 | 1.0392  | 0.10857  | 0.74006   | 0.92817  | 0.89916 | 0.21888  | 0.53485  | 0.88975   | 1.0071  | 0.21207   | 0.98996 | 0.94988 | 0.95575 | 0.078118 | 0.35962   | 0.91215 |
| 6 | 138167025 | rs6923085        | 4 | 0.6558    | 1.1948 | 0.7193 | 1.9934  | 1.0118  | 0.24786  | 0.64834 | 1.9728  | 0.78865  | 0.16834   | 0.58518  | --      | --       | --       | --        | 1.3076  | 1.0843    | 0.71491 | 0.81623 | 0.73366 | 0.59384  | 0.63394   | 0.83048 |
| 6 | 138167295 | rs12110923       | 5 | 0.5618    | 1.0539 | 0.1265 | 1.9715  | 0.26561 | 0.0081   | 0.86781 | 1.0552  | 0.1086   | 0.62307   | 0.92233  | 0.88887 | 0.21906  | 0.49086  | 0.88449   | 1.0127  | 0.21248   | 0.98765 | 0.94111 | 0.96325 | 0.07827  | 0.42087   | 0.90154 |
| 6 | 138167351 | rs113883318      | 5 | 0.8153    | 1.029  | 0.5683 | 1.2433  | 0.73994 | 0.54059  | 0.61881 | 1.2035  | 0.24172  | 0.27833   | 0.73929  | 0.56728 | 0.39181  | 0.024258 | 0.78708   | 1.2729  | 0.56601   | 0.5216  | 0.7459  | 1.0342  | 0.16227  | 0.96586   | 0.74843 |
| 6 | 138167436 | rs189786218      | 3 | 0.4694    | 0.5888 | 0.337  | 0.12512 | 2.1567  | 0.49128  | 0.78451 | --      | --       | --        | 0.094749 | 1.8324  | 0.003821 | 0.58885  | --        | --      | --        | --      | 1.0618  | 0.55025 | 0.55375  | 0.94902   | 0.91215 |
| 6 | 138167513 | rs79785107       | 4 | 0.9363    | 1.0299 | 0.9226 | 0.50881 | 1.3672  | 0.43523  | 0.44643 | 1.3611  | 0.70141  | 0.28128   | 0.41356  | 0.84925 | 0.81467  | 0.6857   | 0.5933    | --      | --        | --      | 1.0618  | 0.55025 | 0.55375  | 0.94902   | 0.91215 |
| 6 | 138168028 | rs111883038      | 5 | 0.04861   | 0.8304 | 0.5441 | 0.61356 | 0.43627 | 0.18214  | 0.82796 | 0.77525 | 0.20265  | 0.15589   | 0.91309  | 0.83352 | 0.27552  | 0.53126  | 0.95545   | 1.5931  | 0.41366   | 0.21729 | 0.94119 | 0.82266 | 0.12508  | 0.15749   | 0.91216 |
| 6 | 138168053 | rs10223631       | 4 | 0.9838    | 1.008  | 0.7325 | 1.6996  | 1.2425  | 0.40958  | 0.57494 | 1.8538  | 0.8118   | 0.22832   | 0.58735  | --      | --       | --       | --        | 1.1234  | 1.0898    | 0.85809 | 0.85387 | 0.67857 | 0.54065  | 0.57675   | 1.1     |
| 6 | 138168083 | rs80126770       | 5 | 0.02116   | 0.81   | 0.5305 | 0.5445  | 0.40299 | 0.12277  | 0.85727 | 0.76272 | 0.1956   | 0.12536   | 0.92909  | 0.8216  | 0.27086  | 0.48428  | 0.9648    | 1.4687  | 0.41107   | 0.31311 | 0.95234 | 0.81366 | 0.12139  | 0.11528   | 0.93231 |
| 6 | 138168214 | rs10223636       | 4 | 0.9716    | 1.0144 | 0.774  | 1.3858  | 1.0156  | 0.59296  | 0.6283  | 1.8118  | 0.83221  | 0.24916   | 0.57103  | --      | --       | --       | --        | 1.135   | 1.0815    | 0.8444  | 0.83529 | 0.66514 | 0.58344  | 0.5625    | 0.94209 |
| 6 | 138168586 | rs140093704      | 4 | 0.7495    | 1.2135 | 0.9053 | --      | --      | --       | --      | 1.2371  | 1.6285   | 0.77314   | 0.36647  | 1.1424  | 1.3028   | 0.97992  | 0.79011   | 4.9293  | 2.0017    | 0.2492  | 0.65091 | 0.98047 | 0.81426  | 0.66066   | 0.65573 |
| 6 | 138168775 | rs115406464      | 3 | 0.9695    | 1.019  | 0.5711 | --      | --      | --       | --      | 1.6882  | 0.87844  | 0.41541   | 0.68286  | --      | --       | --       | --        | 2.0926  | 1.334     | 0.42178 | 0.79226 | 0.63595 | 0.66739  | 0.48431   | 0.83844 |
| 6 | 138169363 | chr6:138169363:D | 5 | 0.4706    | 1.0829 | 0.0344 | 2.255   | 0.25758 | 0.000984 | 0.87727 | 1.034   | 0.10847  | 0.77763   | 0.92071  | 0.91683 | 0.21956  | 0.60504  | 0.89173   | 0.983   | 0.21462   | 0.89761 | 0.94173 | 0.95841 | 0.079032 | 0.40135   | 0.89932 |
| 6 | 138169370 | rs183892239      | 3 | 0.6588    | 0.5671 | 0.0644 | --      | --      | --       | --      | --      | --       | --        | 5.0956   | 1.8927  | 0.3935   | 0.63479  | 0.0023751 | 1.7154  | 0.10651</ |         |         |         |          |           |         |

|   |           |                  |   |          |        |        |         |         |          |         |         |          |           |         |         |          |          |         |         |         |         |         |          |          |           |         |
|---|-----------|------------------|---|----------|--------|--------|---------|---------|----------|---------|---------|----------|-----------|---------|---------|----------|----------|---------|---------|---------|---------|---------|----------|----------|-----------|---------|
| 6 | 138181875 | rs7773054        | 5 | 0.4915   | 1.0654 | 0.2366 | 2.0079  | 0.31612 | rs038988 | 0.9397  | 1.1082  | 0.13332  | 0.45449   | 0.969   | 0.90749 | 0.27049  | 0.65935  | 0.96652 | 1.0616  | 0.25343 | 0.84584 | 0.97863 | 0.96246  | 0.091346 | 0.41291   | 0.9652  |
| 6 | 138182089 | rs139847097      | 2 | 0.8988   | 0.9436 | 0.4082 | --      | --      | --       | --      | 1.5027  | 0.72427  | 0.51245   | 0.76921 | --      | --       | --       | --      | --      | --      | --      | --      | 0.69499  | 0.58718  | 0.84065   | 0.56727 |
| 6 | 138182492 | rs7774101        | 5 | 0.6224   | 0.9655 | 0.2577 | 1.3535  | 0.24075 | 0.374    | 0.95228 | 0.99597 | 0.11046  | 0.89942   | 0.96113 | 0.79886 | 0.18909  | 0.21179  | 0.9659  | 1.234   | 0.22298 | 0.32063 | 0.93394 | 0.89202  | 0.072843 | 0.067746  | 0.96332 |
| 6 | 138182537 | rs190371813      | 3 | 0.6071   | 0.8463 | 0.8696 | --      | --      | --       | --      | 1.109   | 0.61921  | 0.63611   | 0.34539 | 0.85683 | 0.96382  | 0.62653  | 0.38721 | --      | --      | --      | --      | 0.74806  | 0.41458  | 0.15537   | 0.35746 |
| 6 | 138182674 | rs18162718       | 3 | 0.2125   | 0.5653 | 0.6892 | --      | --      | --       | --      | 0.30087 | 0.95024  | 0.057264  | 0.56434 | 1.0945  | 1.2513   | 0.98426  | 0.64824 | --      | --      | --      | --      | 0.61922  | 0.57442  | 0.51369   | 0.73555 |
| 6 | 138182883 | rs187154046      | 5 | 0.6836   | 1.1705 | 0.9967 | 1.5196  | 1.2798  | 0.67284  | 0.67542 | 1.1739  | 0.85198  | 0.68165   | 0.48307 | 1.9966  | 1.7155   | 0.4804   | 0.51474 | 1.0626  | 1.5249  | 0.89423 | 0.33404 | 1.0839   | 0.50334  | 0.94777   | 0.55491 |
| 6 | 138182950 | rs141552843      | 5 | 0.6104   | 0.9002 | 0.9425 | 1.4158  | 0.97063 | 0.47121  | 0.59569 | 1.119   | 0.43398  | 0.71073   | 0.67564 | 0.89174 | 0.47187  | 0.81942  | 0.80718 | 0.58879 | 0.99173 | 0.35891 | 0.54275 | 0.81418  | 0.29387  | 0.34517   | 0.69341 |
| 6 | 138182989 | rs111914659      | 5 | 0.5299   | 1.109  | 0.8369 | 1.0383  | 0.69322 | 0.85703  | 0.50749 | 0.86089 | 0.36268  | 0.3998    | 0.47905 | 0.9855  | 0.59665  | 0.81535  | 0.5482  | 0.60101 | 0.88946 | 0.18321 | 0.38419 | 1.2713   | 0.20778  | 0.10386   | 0.56933 |
| 6 | 138182995 | rs9376304        | 5 | 0.4276   | 0.9612 | 0.841  | 1.134   | 0.2039  | 0.30476  | 0.79982 | 0.92149 | 0.10068  | 0.31242   | 0.78601 | 0.87801 | 0.14998  | 0.34085  | 0.84513 | 0.90817 | 0.20676 | 0.50192 | 0.72755 | 0.9867   | 0.068641 | 0.87828   | 0.84454 |
| 6 | 138183567 | rs73564262       | 5 | 0.4335   | 1.0849 | 0.1586 | 2.1722  | 0.31672 | 0.021033 | 0.94259 | 1.1077  | 0.13358  | 0.45838   | 0.96822 | 0.91578 | 0.27381  | 0.68095  | 0.96081 | 1.0619  | 0.25563 | 0.84733 | 0.97877 | 0.96091  | 0.091547 | 0.40028   | 0.96648 |
| 6 | 138183687 | rs58798533       | 4 | 0.3662   | 0.7025 | 0.5051 | 0.46715 | 1.6785  | 0.50072  | 0.633   | 1.2432  | 0.6421   | 0.66132   | 0.56164 | 0.13752 | 1.3535   | 0.007901 | 0.67118 | --      | --      | --      | --      | 0.63015  | 0.55738  | 0.18172   | 0.55312 |
| 6 | 138184330 | rs9494886        | 5 | 0.7151   | 0.9743 | 0.237  | 1.3499  | 0.23338 | 0.36338  | 0.9722  | 0.99855 | 0.10755  | 0.9218    | 0.98018 | 0.80543 | 0.18486  | 0.22592  | 0.98138 | 1.2433  | 0.21071 | 0.29808 | 0.97716 | 0.89814  | 0.071055 | 0.076252  | 0.97996 |
| 6 | 138184470 | rs957193         | 5 | 0.5075   | 1.0623 | 0.2392 | 1.998   | 0.31516 | 0.041331 | 0.94599 | 1.1055  | 0.13357  | 0.46639   | 0.96838 | 0.90875 | 0.27006  | 0.66571  | 0.96885 | 1.0556  | 0.25483 | 0.86365 | 0.97656 | 0.96057  | 0.071299 | 0.4025    | 0.96499 |
| 6 | 138184773 | rs186951756      | 5 | 0.6873   | 1.1681 | 0.9967 | 1.5196  | 1.2798  | 0.67284  | 0.67542 | 1.1661  | 0.85204  | 0.69391   | 0.48335 | 1.9995  | 1.7451   | 0.47981  | 0.51488 | 1.0577  | 1.5234  | 0.90168 | 0.33384 | 1.0832   | 0.50318  | 0.94968   | 0.5545  |
| 6 | 138185163 | rs192970384      | 5 | 0.6234   | 1.3554 | 0.0837 | 2.3565  | 1.5653  | 0.36947  | 0.66022 | 0.52913 | 0.74415  | 0.30597   | 0.79295 | 42.554  | 1.4346   | 0.24667  | 0.8352  | 0.45463 | 1.2299  | 0.39501 | 0.61713 | 1.0399   | 0.49075  | 0.95936   | 0.6569  |
| 6 | 138185422 | rs654912         | 5 | 0.001341 | 0.8958 | 0.3617 | 1.1171  | 0.13615 | 0.23261  | 0.74288 | 0.86971 | 0.063428 | 0.0036577 | 0.76527 | 0.83869 | 0.095517 | 0.016334 | 0.78467 | 0.79536 | 0.13225 | 0.02488 | 0.75595 | 0.91379  | 0.043082 | 0.0006145 | 0.78081 |
| 6 | 138185770 | rs112370866      | 5 | 0.6498   | 0.9513 | 0.356  | 2.1473  | 0.41667 | 0.039125 | 0.80797 | 0.89991 | 0.17995  | 0.48751   | 0.85981 | 0.91208 | 0.34883  | 0.77362  | 0.82498 | 0.7386  | 0.39296 | 0.37158 | 0.89678 | 0.92133  | 0.14536  | 0.66844   | 0.83659 |
| 6 | 138185836 | chr6:138185836:D | 2 | 0.9722   | 0.9709 | 0.4437 | 0.35153 | 1.574   | 0.2545   | 0.39849 | --      | --       | --        | 1.4701  | 1.0059  | 0.67437  | 0.54761  | --      | --      | --      | --      | --      | --       | --       | --        | --      |
| 6 | 138185838 | rs76617704       | 5 | 0.5016   | 0.8878 | 0.9586 | 1.359   | 0.8978  | 0.32754  | 0.40815 | 0.84744 | 0.353    | 0.31905   | 0.47262 | 1.1603  | 0.64987  | 0.63886  | 0.44869 | 1.1962  | 0.79229 | 0.56564 | 0.41277 | 0.82954  | 0.23165  | 0.12175   | 0.53298 |
| 6 | 138185881 | rs59699063       | 5 | 0.7218   | 0.975  | 0.2399 | 1.3511  | 0.23285 | 0.36307  | 0.97708 | 0.99786 | 0.10765  | 0.91651   | 0.97722 | 0.80853 | 0.18491  | 0.98326  | 1.2449  | 0.21075 | 0.29585 | 0.97746 | 0.89911 | 0.071101 | 0.080543 | 0.97187   | 0.52989 |
| 6 | 138185932 | rs61593413       | 5 | 0.6867   | 0.9723 | 0.2539 | 1.3399  | 0.23221 | 0.38565  | 0.97766 | 0.99785 | 0.10771  | 0.9161    | 0.97783 | 0.80808 | 0.18515  | 0.23448  | 0.98182 | 1.2383  | 0.21104 | 0.30889 | 0.97893 | 0.89892  | 0.07116  | 0.079958  | 0.98158 |
| 6 | 138186427 | rs138592427      | 5 | 0.3215   | 1.2267 | 0.8041 | 1.2776  | 0.9837  | 0.32536  | 0.5634  | 1.0676  | 0.43714  | 0.77211   | 0.57413 | 0.51643 | 0.77811  | 0.07255  | 0.5894  | 1.3145  | 1.9752  | 0.69523 | 0.40669 | 1.4061   | 0.25515  | 0.070622  | 0.63117 |
| 6 | 138186532 | rs59693083       | 5 | 0.7307   | 0.9757 | 0.2342 | 1.339   | 0.23215 | 0.38728  | 0.97577 | 0.9994  | 0.10753  | 0.92742   | 0.97635 | 0.80582 | 0.18466  | 0.22832  | 0.98362 | 1.2535  | 0.20931 | 0.27794 | 0.98255 | 0.89869  | 0.071008 | 0.07817   | 0.98209 |
| 6 | 138186568 | rs141591660      | 3 | 0.3923   | 1.5283 | 0.9592 | 1.0586  | 2.332   | 0.88951  | 0.33686 | 1.8762  | 0.93361  | 0.061191  | 0.35803 | --      | --       | --       | --      | --      | --      | --      | --      | 1.4374   | 0.60462  | 0.053889  | 0.46592 |
| 6 | 138187358 | chr6:138187358:D | 5 | 0.3597   | 1.1038 | 0.9697 | 1.0647  | 0.42768 | 0.85508  | 0.69311 | 1.0806  | 0.19267  | 0.67229   | 0.80548 | 1.0948  | 0.34835  | 0.62355  | 0.77112 | 1.4948  | 0.42812 | 0.15219 | 0.68914 | 1.0814   | 0.15822  | 0.17223   | 0.71142 |
| 6 | 138187498 | rs5029924        | 5 | 0.02408  | 0.8258 | 0.4196 | 0.69347 | 0.35991 | 0.25479  | 0.90418 | 0.84739 | 0.17763  | 0.29063   | 0.9472  | 0.74542 | 0.26368  | 0.24994  | 0.96843 | 1.6015  | 0.36077 | 0.14889 | 0.95034 | 0.79355  | 0.11364  | 0.08641   | 0.95517 |
| 6 | 138187542 | rs189550404      | 3 | 0.2391   | 0.9999 | 0.991  | --      | --      | --       | --      | 0.36532 | 1.3186   | 0.16383   | 0.50346 | 0.48488 | 1.6834   | 0.50403  | 0.50185 | --      | --      | --      | --      | 0.39105  | 1.1772   | 0.24327   | 0.45176 |
| 6 | 138187853 | rs181561081      | 5 | 0.8249   | 0.963  | 0.8137 | 1.3388  | 0.9349  | 0.32059  | 0.71695 | 0.83286 | 0.34196  | 0.45569   | 0.72892 | 0.58426 | 0.56384  | 0.29569  | 0.73279 | 0.7587  | 0.80004 | 0.58563 | 0.70344 | 1.1081   | 0.22356  | 0.52756   | 0.80189 |
| 6 | 138189146 | chr6:138189146:I | 5 | 0.4731   | 1.0729 | 0.1941 | 2.0822  | 0.31254 | 0.032171 | 0.95271 | 1.0932  | 0.13308  | 0.52531   | 0.97227 | 0.90621 | 0.27248  | 0.65062  | 0.96576 | 1.0731  | 0.25518 | 0.81441 | 0.97638 | 0.96226  | 0.09118  | 0.41826   | 0.97186 |
| 6 | 138189515 | rs5029926        | 5 | 0.692    | 0.9725 | 0.2426 | 1.3457  | 0.23221 | 0.37323  | 0.98061 | 0.99665 | 0.10765  | 0.90567   | 0.97123 | 0.80504 | 0.18413  | 0.22643  | 0.98671 | 1.2349  | 0.20867 | 0.31215 | 0.98349 | 0.8979   | 0.070911 | 0.077616  | 0.98346 |
| 6 | 138189564 | rs144162409      | 3 | 0.6395   | 1.3652 | 0.9854 | --      | --      | --       | --      | 1.0784  | 1.7353   | 0.95148   | 0.41345 | 1.6668  | 1.9487   | 0.59494  | 0.45005 | --      | --      | --      | --      | 1.3864   | 0.77423  | 0.27962   | 0.4654  |
| 6 | 138189862 | rs662887         | 4 | 0.6938   | 0.9077 | 0.8145 | 0.58695 | 0.98614 | 0.28169  | 0.32257 | 1.0377  | 0.52212  | 0.81575   | 0.34359 | 1.4463  | 0.63776  | 0.28718  | 0.43498 | --      | --      | --      | --      | 0.79959  | 0.32671  | 0.16026   | 0.33109 |
| 6 | 138189884 | rs583522         | 5 | 1.47E-11 | 0.8129 | 0.4924 | 0.98885 | 0.13464 | 0.86987  | 0.98599 | 0.79295 | 0.060936 | 0.0000886 | 0.98641 | 0.75975 | 0.093438 | 0.002535 | 0.99456 | 0.74698 | 0.12556 | 0.02098 | 0.99024 | 0.82605  | 0.04279  | 3.03E-08  | 0.99135 |
| 6 | 138189942 | rs5029928        | 5 | 0.6837   | 0.9716 | 0.2408 | 1.3401  | 0.23196 | 0.38671  | 0.98149 | 0.99557 | 0.10766  | 0.89787   | 0.97254 | 0.80353 | 0.18425  | 0.22178  | 0.98572 | 1.2383  | 0.20875 | 0.30586 | 0.9847  | 0.89682  | 0.070841 | 0.076212  | 0.98506 |
| 6 | 138190118 | chr6:138190118:D | 5 | 6.62E-09 | 0.8459 | 0.4959 | 0.9087  | 0.12761 | 0.78929  | 0.98472 | 0.81587 | 0.057634 | 0.0003234 | 0.98905 | 0.82648 | 0.088431 | 0.027464 | 0.99095 | 0.71807 | 0.11851 | 0.0057  | 0.9862  | 0.87425  | 0.039557 | 0.0000268 | 0.98989 |
| 6 | 138190154 | rs3757173        | 5 | 0.723    | 0.9749 | 0.2267 | 1.3439  | 0.22884 | 0.37155  | 1       | 0.99427 | 0.10764  | 0.88749   | 0.97382 | 0.79416 | 0.1817   | 0.19789  | 1       | 1.2434  | 0.20683 | 0.2945  | 1       | 0.90344  | 0.070135 | 0.099921  | 1       |
| 6 | 138190533 | rs7750604        | 5 | 0.6323   | 0.9667 | 0.2475 | 1.3262  | 0.2362  | 0.41556  | 0.96791 | 0.99333 | 0.10867  | 0.88045   | 0.96632 | 0.8011  | 0.18586  | 0.21629  | 0.97845 | 1.2418  | 0.20999 | 0.29893 | 0.97944 | 0.89145  | 0.071713 | 0.066911  | 0.97463 |
| 6 | 138190684 | rs5029930        | 5 | 0.6902   | 0.9722 | 0.2406 | 1.346   | 0.23235 | 0.37377  | 0.98104 | 0.9958  | 0.10761  | 0.89899   | 0.97335 | 0.80482 | 0.1842   | 0.22603  | 0.98667 | 1.2356  | 0.20845 | 0.31062 | 0.98451 | 0.89722  | 0.070901 | 0.076763  | 0.98341 |
| 6 | 138190816 | rs5029931        | 5 | 0.5127   | 1.063  | 0.2269 | 2.0257  | 0.31507 | 0.037085 | 0.94391 | 1.0949  | 0.13311  | 0.51661   | 0.96959 | 0.90299 | 0.26928  | 0.64963  | 0.9713  | 1.0642  | 0.25492 | 0.83776 | 0.97251 | 0.96126  | 0.090904 | 0.41812   | 0.96816 |
| 6 | 138191418 | rs145419088      | 4 | 0.2388   | 1.2068 | 0.7903 | 1.2416  | 0.61837 | 0.55804  | 0.81397 | 1.4277  | 0.32371  | 0.16833   | 0.79222 | 0.84307 | 0.41039  | 0.59477  | 0.84461 | --      | --      | --      | --      | 1.2327   | 0.21726  | 0.069004  | 0.79127 |
| 6 | 138191686 | rs191150370      | 2 | 0.3361   | 0.6334 | 0.6349 | --      | --      | --       | --      | --      | --       | --        | 0.77422 | 0.63582 | 0.52334  | 0.65784  | --      | --      | --      | --      | 0.49179 | 0.71369  | 0.097948 | 0.36092   |         |
| 6 | 138191965 | rs145113712      | 3 | 0.9551</ |        |        |         |         |          |         |         |          |           |         |         |          |          |         |         |         |         |         |          |          |           |         |



|   |           |                  |   |           |        |        |         |         |          |         |         |          |           |         |         |          |          |         |         |         |         |         |         |          |           |         |
|---|-----------|------------------|---|-----------|--------|--------|---------|---------|----------|---------|---------|----------|-----------|---------|---------|----------|----------|---------|---------|---------|---------|---------|---------|----------|-----------|---------|
| 6 | 138202258 | rs140354477      | 4 | 0.1679    | 0.6515 | 0.9941 | 0.91534 | 1.3633  | 0.94821  | 0.44355 | 0.60953 | 0.6228   | 0.17883   | 0.59248 | 0.58736 | 1.3348   | 0.30598  | 0.56161 | --      | --      | --      | --      | 0.65614 | 0.38681  | 0.15275   | 0.63359 |
| 6 | 138202557 | rs140042278      | 5 | 0.8047    | 0.9579 | 0.9784 | 0.79695 | 0.8595  | 0.60945  | 0.41329 | 0.99381 | 0.31867  | 0.99054   | 0.51378 | 1.0916  | 0.59022  | 0.79821  | 0.4469  | 1.3862  | 0.72904 | 0.35025 | 0.50815 | 0.89341 | 0.24248  | 0.18436   | 0.50299 |
| 6 | 138203289 | rs5029966        | 5 | 0.5077    | 0.847  | 0.9753 | 1.7657  | 1.4656  | 0.42678  | 0.58651 | 0.89216 | 0.5351   | 0.78076   | 0.74158 | 0.92611 | 0.8047   | 0.93168  | 0.77992 | 0.46659 | 1.3421  | 0.41829 | 0.63461 | 0.81899 | 0.31873  | 0.75127   | 0.80499 |
| 6 | 138203536 | rs5029967        | 5 | 0.8022    | 0.9499 | 0.9884 | 0.79101 | 1.0567  | 0.63571  | 0.37214 | 1.0879  | 0.4582   | 0.60613   | 0.41391 | 1.0492  | 0.51664  | 0.73307  | 0.52531 | 1.0838  | 0.6214  | 0.8132  | 0.62857 | 0.85811 | 0.29148  | 0.22488   | 0.48191 |
| 6 | 138204309 | rs5029958        | 3 | 0.791     | 1.1471 | 0.3073 | --      | --      | --       | --      | 1.7872  | 0.8715   | 0.40163   | 0.74281 | --      | --       | --       | --      | 3.3146  | 1.0998  | 0.21852 | 0.90663 | 0.57262 | 0.63889  | 0.46458   | 0.86437 |
| 6 | 138205019 | rs146922984      | 2 | 0.6441    | 1.9391 | 0.911  | 2.1342  | 1.6707  | 0.61128  | 0.85765 | --      | --       | --        | --      | --      | --       | --       | --      | --      | --      | --      | --      | 1.4839  | 2.791    | 0.27479   | 0.47401 |
| 6 | 138205272 | rs182287739      | 5 | 0.3368    | 1.2102 | 0.7854 | 1.4995  | 0.89882 | 1.13971  | 0.58892 | 1.0278  | 0.41466  | 0.89826   | 0.56456 | 0.51591 | 0.76561  | 0.063723 | 0.58127 | 1.3037  | 0.894   | 0.68146 | 0.39071 | 1.3782  | 0.24766  | 0.09339   | 0.63165 |
| 6 | 138205427 | rs143180442      | 3 | 0.5739    | 1.2099 | 0.7647 | 1.4952  | 1.4457  | 0.70415  | 0.45754 | 1.5079  | 0.47609  | 0.72201   | 0.48906 | --      | --       | --       | --      | --      | --      | --      | --      | 0.91382 | 0.51148  | 0.31733   | 0.40213 |
| 6 | 138205704 | rs148258978      | 4 | 0.3433    | 1.4454 | 0.9496 | 1.5191  | 1.3715  | 0.75306  | 0.56556 | 0.88309 | 0.93575  | 0.7581    | 0.34622 | 1.7022  | 0.61564  | 0.25748  | 0.86108 | --      | --      | --      | --      | 1.5127  | 0.65858  | 0.19057   | 0.55167 |
| 6 | 138206006 | rs117573160      | 4 | 0.3432    | 1.4456 | 0.9496 | 1.5191  | 1.3715  | 0.75306  | 0.56556 | 0.88297 | 0.93588  | 0.75772   | 0.3461  | 1.7022  | 0.61574  | 0.25741  | 0.86093 | --      | --      | --      | --      | 1.5133  | 0.65856  | 0.19011   | 0.55156 |
| 6 | 138206016 | rs636617         | 5 | 0.0854    | 0.9205 | 0.3222 | 0.91418 | 1.01755 | 0.48339  | 0.88842 | 1.0172  | 0.083962 | 0.82322   | 0.83661 | 1.058   | 0.13546  | 0.59729  | 0.90851 | 0.77338 | 0.16531 | 0.09038 | 0.84406 | 0.86816 | 0.05537  | 0.0057291 | 0.91959 |
| 6 | 138206681 | rs181169004      | 4 | 0.8925    | 1.0604 | 0.9756 | 0.92462 | 1.7816  | 0.73999  | 0.4455  | 0.82309 | 0.81731  | 0.58339   | 0.41512 | 1.0311  | 0.81403  | 0.81083  | 0.44748 | --      | --      | --      | --      | 1.34    | 0.7096   | 0.45809   | 0.38592 |
| 6 | 138206783 | rs642627         | 5 | 1.97E-11  | 0.813  | 0.4843 | 0.99217 | 1.03563 | 0.85712  | 0.9622  | 0.97168 | 0.061256 | 0.000687  | 0.97205 | 0.74764 | 0.093824 | 0.001225 | 0.97595 | 0.77114 | 0.12782 | 0.03447 | 0.97306 | 0.82625 | 0.042497 | 2.11E-08  | 0.97289 |
| 6 | 138206968 | rs9494889        | 4 | 0.4436    | 0.7262 | 0.4825 | 0.42038 | 1.7953  | 0.51323  | 0.65107 | 1.4585  | 0.71011  | 0.45797   | 0.53528 | 1.15516 | 1.3206   | 0.011654 | 0.68107 | --      | --      | --      | --      | 0.64759 | 0.59054  | 0.24228   | 0.5242  |
| 6 | 138207042 | rs622091         | 5 | 2.89E-11  | 0.8212 | 0.7376 | 0.86267 | 1.13225 | 0.45436  | 0.94879 | 0.97189 | 0.058972 | 0.0000376 | 0.973   | 0.77523 | 0.091089 | 0.004076 | 0.97385 | 0.75967 | 0.12062 | 0.02212 | 0.97056 | 0.84863 | 0.040617 | 8.28E-07  | 0.97161 |
| 6 | 138207165 | rs150074343      | 4 | 0.5122    | 0.8443 | 0.9728 | 1.1183  | 1.0194  | 0.78524  | 0.51752 | 0.94455 | 0.70429  | 0.78685   | 0.30954 | 0.65326 | 0.71851  | 0.23031  | 0.58981 | --      | --      | --      | --      | 0.84437 | 0.31483  | 0.32386   | 0.48892 |
| 6 | 138207316 | rs192256134      | 4 | 0.5945    | 1.1237 | 0.8145 | 1.0305  | 0.90702 | 0.89247  | 0.81604 | 1.43    | 0.50207  | 0.32404   | 0.72335 | 1.8981  | 0.75607  | 0.39256  | 0.79322 | --      | --      | --      | --      | 0.98957 | 0.2681   | 0.98998   | 0.85827 |
| 6 | 138207509 | rs145394417      | 4 | 0.4566    | 1.2268 | 0.9115 | --      | --      | --       | --      | 1.5579  | 0.70286  | 0.13277   | 0.41389 | 0.89865 | 0.61536  | 0.73234  | 0.77289 | 0.86419 | 1.0667  | 0.80569 | 0.59108 | 1.3338  | 0.35983  | 0.93004   | 0.61995 |
| 6 | 138207510 | rs148779183      | 5 | 0.8901    | 1.043  | 0.9932 | 1.4537  | 2.9174  | 1.07865  | 0.31213 | 0.88752 | 0.60059  | 0.70504   | 0.489   | 0.89098 | 1.0939   | 0.74326  | 0.44848 | 1.6421  | 1.2765  | 0.52152 | 0.56565 | 1.0863  | 0.39422  | 4.55      | 0.47402 |
| 6 | 138207729 | rs1082428        | 5 | 1.15E-11  | 0.8185 | 0.7152 | 0.85929 | 0.132   | 0.4471   | 0.96168 | 0.97144 | 0.058832 | 0.0000401 | 0.98175 | 0.77514 | 0.090882 | 0.004345 | 0.98803 | 0.74423 | 0.12985 | 0.01508 | 0.98181 | 0.84588 | 0.040472 | 5.33E-07  | 0.98578 |
| 6 | 138207791 | rs146933397      | 4 | 0.3446    | 1.4444 | 0.9496 | 1.5176  | 1.3707  | 0.75443  | 0.5655  | 0.88186 | 0.93694  | 0.75459   | 0.34547 | 1.7008  | 0.61625  | 0.25794  | 0.86001 | --      | --      | --      | --      | 1.5122  | 0.65919  | 0.1912    | 0.55089 |
| 6 | 138208128 | rs1082427        | 5 | 0.03957   | 0.898  | 0.7053 | 1.1005  | 0.25171 | 0.5031   | 0.87091 | 0.9108  | 0.098574 | 0.32508   | 0.91274 | 0.87632 | 0.16066  | 0.43642  | 0.91569 | 0.69897 | 0.20833 | 0.05231 | 0.85592 | 0.908   | 0.073415 | 0.21352   | 0.88374 |
| 6 | 138208187 | rs150941623      | 3 | 0.609     | 0.7333 | 0.8591 | --      | --      | --       | --      | --      | --       | --        | --      | 0.66237 | 1.9302   | 0.54436  | 0.50767 | 0.38454 | 1.3572  | 0.15013 | 0.38486 | 0.89385 | 0.7238   | 0.46536   | 0.40978 |
| 6 | 138208265 | rs182304063      | 2 | 0.587     | 0.4995 | 0.1935 | --      | --      | --       | --      | 3.5406  | 1.9689   | 0.19822   | 0.44145 | --      | --       | --       | --      | --      | --      | --      | --      | 0.21693 | 0.85821  | 0.013009  | 0.6472  |
| 6 | 138208349 | rs191869612      | 3 | 0.9473    | 1.0306 | 0.9255 | --      | --      | --       | --      | 0.78033 | 0.82403  | 0.49079   | 0.42049 | 0.99745 | 0.82811  | 0.89983  | 0.45297 | --      | --      | --      | --      | 1.3163  | 0.73141  | 0.63119   | 0.39776 |
| 6 | 138208415 | rs140702333      | 4 | 0.4407    | 0.7246 | 0.4825 | 0.41775 | 1.7938  | 0.51103  | 0.65018 | 1.46    | 0.71154  | 0.4569    | 0.53445 | 0.1556  | 1.3195   | 0.011816 | 0.68103 | --      | --      | --      | --      | 0.64617 | 0.59027  | 0.24022   | 0.52386 |
| 6 | 138208573 | rs150176279      | 2 | 0.7379    | 1.3112 | 0.6696 | 1.71    | 1.0011  | 0.37816  | 0.68542 | --      | --       | --        | --      | --      | --       | --       | --      | --      | --      | --      | --      | 0.83661 | 1.3282   | 0.9086    | 0.38129 |
| 6 | 138208957 | rs185645658      | 4 | 0.417     | 1.4041 | 0.9871 | 1.7127  | 1.4532  | 0.67934  | 0.67786 | 1.1816  | 1.3184   | 0.7044    | 0.32869 | 1.62    | 0.64338  | 0.36204  | 0.92062 | --      | --      | --      | --      | 1.2073  | 0.66629  | 0.94487   | 0.81653 |
| 6 | 138209441 | chr6:138209441:D | 4 | 0.999     | 1.0003 | 0.9153 | 2.027   | 1.0987  | 0.064097 | 0.40657 | 0.85156 | 0.50242  | 0.41298   | 0.37928 | 0.99845 | 0.63706  | 0.97531  | 0.36461 | --      | --      | --      | --      | 1.0064  | 0.32501  | 0.80422   | 0.39046 |
| 6 | 138209491 | rs141769625      | 5 | 0.3889    | 1.1443 | 0.137  | 1.3194  | 0.42416 | 0.007001 | 0.96107 | 1.1697  | 0.20132  | 0.41503   | 0.92287 | 0.91279 | 0.3891   | 0.82027  | 0.95456 | 0.96015 | 0.35578 | 0.90489 | 0.8937  | 0.97944 | 0.13695  | 0.46421   | 0.93096 |
| 6 | 138209785 | rs603904         | 5 | 4.09E-09  | 0.8442 | 0.4346 | 0.91633 | 1.02819 | 0.81028  | 0.95735 | 0.8192  | 0.057658 | 0.0003874 | 0.97059 | 0.80544 | 0.080656 | 0.010771 | 0.9914  | 0.71217 | 0.11841 | 0.00447 | 0.98281 | 0.87383 | 0.039441 | 0.0002399 | 0.99077 |
| 6 | 138210325 | rs142084244      | 5 | 0.0001015 | 0.824  | 0.657  | 1.147   | 0.28862 | 0.568    | 0.91919 | 1.2908  | 0.12667  | 0.028657  | 0.93813 | 1.6961  | 0.19694  | 0.005476 | 0.95239 | 1.265   | 0.26903 | 0.31941 | 0.91474 | 1.2257  | 0.088456 | 0.0018581 | 0.93676 |
| 6 | 138210491 | rs181441306      | 3 | 0.5863    | 1.3438 | 0.8908 | --      | --      | --       | --      | 1.5462  | 0.76729  | 0.1864    | 0.42544 | --      | --       | --       | --      | 2.1204  | 1.16604 | 0.48947 | 0.70036 | 0.99223 | 0.86673  | 0.95425   | 0.36076 |
| 6 | 138210537 | rs1082425        | 5 | 1.22E-11  | 0.8186 | 0.7038 | 0.85921 | 1.13204 | 0.44667  | 0.96082 | 0.79221 | 0.058864 | 0.0000426 | 0.98029 | 0.77487 | 0.090882 | 0.00427  | 0.98753 | 0.74109 | 0.19609 | 0.01377 | 0.98323 | 0.84627 | 0.04049  | 5.45E-07  | 0.98481 |
| 6 | 138210619 | rs117786925      | 4 | 0.8027    | 1.2092 | 0.9654 | 2.3441  | 1.7696  | 0.57309  | 0.61434 | --      | --       | --        | 0.63527 | 1.8566  | 0.45477  | 0.48491  | 1.0011  | 1.9067  | 0.96991 | 0.34676 | 1.2489  | 1.0872  | 0.6872   | 0.40711   |         |
| 6 | 138210809 | rs150696510      | 5 | 0.5295    | 0.9559 | 0.5953 | 0.78155 | 0.36324 | 0.33487  | 0.85201 | 0.94985 | 0.14716  | 0.67772   | 0.92141 | 0.86845 | 0.19438  | 0.44069  | 0.95488 | 1.5107  | 0.30684 | 0.1193  | 0.89009 | 0.95135 | 0.098137 | 0.48552   | 0.91271 |
| 6 | 138210846 | rs57606722       | 4 | 0.7111    | 1.4443 | 0.8125 | 1.5679  | 0.95511 | 0.47589  | 0.68951 | 1.4311  | 0.76137  | 0.44451   | 0.56329 | --      | --       | --       | --      | 1.7896  | 0.92983 | 0.4189  | 0.84815 | 0.7345  | 0.6103   | 0.69572   | 0.77435 |
| 6 | 138210908 | rs139956717      | 2 | 0.9371    | 1.0517 | 0.7323 | --      | --      | --       | --      | --      | --       | --        | 1.5839  | 1.3572  | 0.34829  | 0.3029   | --      | --      | --      | --      | 0.93586 | 0.72451 | 0.86679  | 0.31102   |         |
| 6 | 138211248 | rs144823665      | 4 | 0.7113    | 1.1542 | 0.8128 | 1.5682  | 0.9552  | 0.47571  | 0.68935 | 1.4308  | 0.76132  | 0.44455   | 0.56311 | --      | --       | --       | --      | 1.7885  | 0.9303  | 0.41929 | 0.84759 | 0.73457 | 0.61043  | 0.69498   | 0.77358 |
| 6 | 138211888 | rs190991549      | 2 | 0.6976    | 1.2473 | 0.863  | --      | --      | --       | --      | 1.0641  | 1.0825   | 0.92518   | 0.55582 | --      | --       | --       | --      | --      | --      | --      | --      | 1.3253  | 0.66868  | 0.43535   | 0.70839 |
| 6 | 138212312 | rs140071075      | 5 | 0.3097    | 1.1262 | 0.87   | 0.88181 | 0.478   | 0.71486  | 0.82443 | 1.0832  | 0.23771  | 0.67768   | 0.83193 | 1.0286  | 0.27347  | 0.84761  | 0.89684 | 0.6248  | 0.86704 | 0.15547 | 0.35427 | 1.249   | 0.166    | 0.048508  | 0.83373 |
| 6 | 138212356 | rs188544657      | 5 | 0.01851   | 1.5056 | 0.6993 | 0.83611 | 0.81398 | 0.78047  | 0.82006 | 1.1672  | 0.36111  | 0.56691   | 0.77146 | 1.1029  | 0.57197  | 0.95287  | 0.8899  | 0.95719 | 1.4538  | 0.9188  | 0.45974 | 1.832   | 0.22131  | 0.0002409 | 0.83358 |
| 6 | 138212475 | rs9494890        | 4 | 0.4351    | 0.7214 | 0.4831 | 0.4188  | 1.7945  | 0.51197  | 0.64992 | 1.4644  | 0.71552  | 0.45298   | 0.53114 | 0.15609 | 1.3186   | 0.012075 | 0.68188 | --      | --      | --      | --      | 0.64245 | 0.58966  | 0.23551   | 0.52301 |
| 6 |           |                  |   |           |        |        |         |         |          |         |         |          |           |         |         |          |          |         |         |         |         |         |         |          |           |         |

|   |           |                  |   |           |        |        |         |         |          |         |         |          |           |         |         |          |          |         |         |         |         |         |         |          |           |         |
|---|-----------|------------------|---|-----------|--------|--------|---------|---------|----------|---------|---------|----------|-----------|---------|---------|----------|----------|---------|---------|---------|---------|---------|---------|----------|-----------|---------|
| 6 | 138221595 | rs148768253      | 4 | 0.3547    | 1.4387 | 0.952  | 1.5109  | 1.3697  | 0.7572   | 0.55833 | 0.87755 | 0.95075  | 0.73948   | 0.33557 | 1.6842  | 0.62187  | 0.26451  | 0.85177 | --      | --      | --      | --      | 1.5131  | 0.66676  | 0.19421   | 0.54461 |
| 6 | 138221761 | rs117463634      | 4 | 0.7969    | 0.892  | 0.5132 | 0.11114 | 1.729   | 0.37807  | 0.68936 | 1.4755  | 0.66406  | 0.5673    | 0.70495 | 1.065   | 1.037    | 0.90668  | 0.70755 | --      | --      | --      | --      | 0.59975 | 0.80699  | 0.23738   | 0.51906 |
| 6 | 138221817 | rs112349808      | 5 | 0.4865    | 1.0649 | 0.2658 | 2.011   | 0.31848 | 0.038045 | 0.91911 | 1.0781  | 0.13581  | 0.59264   | 0.94618 | 0.95604 | 0.2822   | 0.79253  | 0.93986 | 1.1162  | 0.26746 | 0.70157 | 0.95594 | 0.96199 | 0.90309  | 0.41723   | 0.94635 |
| 6 | 138222383 | rs9399228        | 4 | 0.4462    | 0.7297 | 0.9594 | 0.93874 | 1.3832  | 0.79881  | 0.34263 | --      | --       | --        | 0.5545  | 0.67403 | 0.14284  | 0.59465  | 0.74295 | 0.9299  | 0.4517  | 0.4184  | 0.9184  | 0.71341 | 0.91687  | 0.31526   |         |
| 6 | 138222510 | rs9321634        | 5 | 9.71E-08  | 1.1806 | 0.3678 | 1.103   | 0.12974 | 0.73775  | 0.94011 | 1.2056  | 0.058172 | 0.0008909 | 0.96241 | 1.2563  | 0.087834 | 0.007904 | 1       | 1.41    | 0.11807 | 0.00436 | 1       | 1.1319  | 0.039444 | 0.0000892 | 1       |
| 6 | 138222580 | rs17780429       | 5 | 4.56E-05  | 1.1725 | 0.8071 | 0.96314 | 0.17101 | 0.77042  | 0.93117 | 1.1897  | 0.075524 | 0.023086  | 1       | 1.2378  | 0.11489  | 0.047512 | 0.97432 | 1.1432  | 0.16507 | 0.39704 | 0.9467  | 1.176   | 0.05469  | 0.0000305 | 0.95846 |
| 6 | 138222611 | rs146522936      | 5 | 0.174     | 1.3543 | 0.8746 | 1.9926  | 0.72715 | 0.28461  | 0.63641 | 1.0284  | 0.38998  | 0.90502   | 0.76309 | 1.1886  | 0.82955  | 0.58852  | 0.70419 | 2.2478  | 0.81537 | 0.17624 | 0.74848 | 1.436   | 0.33973  | 0.040009  | 0.70062 |
| 6 | 138223082 | rs17066926       | 3 | 0.5918    | 1.2037 | 0.7569 | --      | --      | --       | --      | 0.88882 | 0.59061  | 0.71362   | 0.47299 | 1.648   | 0.58136  | 0.24443  | 0.82458 | --      | --      | --      | --      | 1.1755  | 0.62719  | 0.56667   | 0.43458 |
| 6 | 138223087 | rs112308288      | 5 | 0.4061    | 0.9115 | 0.7545 | 0.58538 | 0.54313 | 0.091349 | 0.47665 | 0.82996 | 0.21079  | 0.11949   | 0.56397 | 0.83669 | 0.36563  | 0.26633  | 0.56278 | 0.65261 | 0.56889 | 0.13931 | 0.50342 | 1.0281  | 0.15097  | 0.90545   | 0.53543 |
| 6 | 138223117 | rs79254515       | 5 | 0.354     | 1.1527 | 0.1543 | 3.182   | 0.44308 | 0.007027 | 0.95674 | 1.165   | 0.20233  | 0.42592   | 0.9143  | 0.91463 | 0.38678  | 0.82515  | 0.95181 | 1.0056  | 0.35901 | 0.98903 | 0.90379 | 0.99198 | 0.13852  | 0.53038   | 0.93443 |
| 6 | 138223248 | chr6:138223248:D | 4 | 0.9039    | 0.9396 | 0.9981 | 1.0022  | 2.692   | 0.77658  | 0.3068  | 0.94585 | 0.8883   | 0.85007   | 0.33849 | 0.71034 | 1.5613   | 0.67927  | 0.32032 | --      | --      | --      | --      | 0.98804 | 0.71814  | 0.77165   | 0.37434 |
| 6 | 138223489 | rs9494892        | 5 | 0.01326   | 0.8108 | 0.4276 | 0.6439  | 0.35685 | 0.18573  | 0.89517 | 0.80315 | 0.18584  | 0.18738   | 0.92563 | 0.74017 | 0.25762  | 0.21707  | 0.95919 | 1.6081  | 0.3783  | 0.16918 | 0.94193 | 0.7975  | 0.11142  | 0.043332  | 0.95747 |
| 6 | 138223490 | rs9494893        | 5 | 0.03555   | 0.8213 | 0.3635 | 0.59634 | 0.37127 | 0.16005  | 0.89934 | 0.81783 | 0.18781  | 0.23407   | 0.93333 | 0.74444 | 0.25964  | 0.23558  | 0.97029 | 1.6436  | 0.3753  | 0.15715 | 0.96837 | 0.80711 | 0.11213  | 0.054396  | 0.99195 |
| 6 | 138223911 | rs148875474      | 5 | 0.1801    | 0.7004 | 0.7974 | 0.28073 | 0.95973 | 0.15902  | 0.67698 | 0.83943 | 0.61833  | 0.67236   | 0.78027 | 0.45143 | 0.72686  | 0.19674  | 0.90051 | 0.57298 | 1.228   | 0.48983 | 0.58808 | 0.8449  | 0.35564  | 0.54919   | 0.83759 |
| 6 | 138223917 | rs186931074      | 2 | 0.06695   | 0.359  | 0.5207 | --      | --      | --       | --      | 0.64672 | 1.0734   | 0.42854   | 0.53896 | --      | --       | --       | --      | --      | --      | --      | --      | 0.28836 | 0.65504  | 0.05094   | 0.59474 |
| 6 | 138224646 | rs113417372      | 2 | 0.7144    | 1.509  | 0.9784 | 1.4093  | 2.7681  | 0.82279  | 0.41203 | 1.5295  | 1.2303   | 0.48283   | 0.52798 | --      | --       | --       | --      | --      | --      | --      | --      | --      | --       | --        | --      |
| 6 | 138224795 | rs142030449      | 4 | 0.518     | 0.8462 | 0.9729 | 1.1127  | 1.0185  | 0.79115  | 0.51841 | 0.95153 | 0.70477  | 0.81277   | 0.30834 | 0.65405 | 0.71858  | 0.23194  | 0.58973 | --      | --      | --      | --      | 0.84608 | 0.31512  | 0.32983   | 0.4884  |
| 6 | 138224945 | rs150270480      | 5 | 0.5206    | 1.2449 | 0.9685 | 3.3568  | 1.9022  | 0.054156 | 0.61631 | 1.1992  | 0.78627  | 0.71967   | 0.6454  | 1.6145  | 1.0074   | 0.51869  | 0.72324 | 0.642   | 1.4673  | 0.58154 | 0.48968 | 1.2071  | 0.43621  | 0.52089   | 0.74595 |
| 6 | 138224995 | rs76054803       | 3 | 0.657     | 1.2945 | 0.2316 | --      | --      | --       | --      | 1.8944  | 0.87265  | 0.35171   | 0.73665 | --      | --       | --       | --      | 3.9995  | 1.0644  | 0.13749 | 0.88841 | 0.56665 | 0.63897  | 0.44896   | 0.85327 |
| 6 | 138225173 | rs9484098        | 4 | 0.628     | 1.2136 | 0.7352 | 1.7871  | 1.1169  | 0.3812   | 0.68059 | 1.691   | 0.78927  | 0.30609   | 0.60581 | --      | --       | --       | --      | 1.9791  | 0.94327 | 0.35998 | 0.86399 | 0.72927 | 0.60481  | 0.6798    | 0.80369 |
| 6 | 138226233 | rs76324768       | 2 | 0.7912    | 0.6572 | 0.7304 | --      | --      | --       | --      | --      | --       | --        | 0.39682 | 2.1579  | 0.20978  | 0.53862  | --      | --      | --      | --      | 1.1877  | 2.3374  | 0.50767  | 0.35478   |         |
| 6 | 138226681 | rs6934778        | 5 | 0.4878    | 1.0647 | 0.2671 | 2.0103  | 0.31864 | 0.037899 | 0.91695 | 1.0777  | 0.13605  | 0.59418   | 0.9433  | 0.95613 | 0.28241  | 0.79281  | 0.93834 | 1.1164  | 0.26765 | 0.70084 | 0.95496 | 0.96205 | 0.903172 | 0.41829   | 0.94488 |
| 6 | 138226778 | rs115350543      | 4 | 0.4014    | 0.7015 | 0.4915 | 0.41428 | 1.789   | 0.50706  | 0.64512 | 1.4916  | 0.74345  | 0.42919   | 0.51008 | 0.16117 | 1.3138   | 0.013646 | 0.68484 | --      | --      | --      | --      | 0.62217 | 0.5871   | 0.21219   | 0.52008 |
| 6 | 138227102 | rs4896301        | 5 | 1.77E-07  | 1.1831 | 0.3494 | 1.1077  | 0.12965 | 0.72063  | 0.93942 | 1.2057  | 0.058216 | 0.0000781 | 0.9607  | 1.2596  | 0.087912 | 0.007121 | 0.99572 | 1.4162  | 0.11815 | 0.0039  | 0.99369 | 1.1313  | 0.039495 | 0.0000927 | 0.99441 |
| 6 | 138227364 | rs7752903        | 5 | 0.04857   | 0.8212 | 0.3447 | 0.6329  | 0.37515 | 0.21126  | 0.90581 | 0.74821 | 0.19585  | 0.10005   | 0.92461 | 0.80512 | 0.26538  | 0.42187  | 0.97104 | 1.7394  | 0.38718 | 0.13698 | 0.98825 | 0.81028 | 0.11504  | 0.062223  | 0.95974 |
| 6 | 138227874 | rs72980769       | 5 | 0.0001084 | 1.2899 | 0.7264 | 1.23    | 0.30335 | 0.33876  | 0.90658 | 1.3365  | 0.13108  | 0.034001  | 0.92163 | 1.6213  | 0.19884  | 0.10449  | 0.94589 | 1.3961  | 0.28503 | 0.16986 | 0.8729  | 1.2067  | 0.089601 | 0.0033315 | 0.9646  |
| 6 | 138228056 | rs186537760      | 2 | 0.3224    | 2.4873 | 0.4109 | --      | --      | --       | 5.704   | 1.3663  | 0.060001 | 0.54786   | --      | --      | --       | --       | --      | --      | --      | --      | --      | 1.2466  | 1.2465   | 0.97045   | 0.9384  |
| 6 | 138228428 | rs149921868      | 5 | 0.9091    | 1.035  | 0.9698 | 1.1901  | 1.0764  | 0.6086   | 0.55918 | 0.97622 | 0.47183  | 0.86643   | 0.70452 | 1.3143  | 1.6118   | 0.63418  | 0.39337 | 0.28418 | 1.925   | 0.31724 | 0.54239 | 1.1209  | 0.44709  | 0.37988   | 0.64205 |
| 6 | 138228520 | rs9494894        | 5 | 0.01878   | 0.8146 | 0.3939 | 0.63632 | 0.35909 | 0.18486  | 0.90532 | 0.78916 | 0.18597  | 0.15747   | 0.92834 | 0.73543 | 0.25765  | 0.21237  | 0.97128 | 1.6448  | 0.37961 | 0.1586  | 0.95583 | 0.80863 | 0.1117   | 0.058152  | 0.96232 |
| 6 | 138228547 | rs181963669      | 4 | 0.6989    | 0.7767 | 0.7611 | 0.26788 | 1.7763  | 0.4253   | 0.43866 | 2.8786  | 1.5322   | 0.101     | 0.39914 | 0.95852 | 1.806    | 0.95616  | 0.375   | --      | --      | --      | --      | 0.62324 | 0.8788   | 0.31314   | 0.41948 |
| 6 | 138228774 | rs57427648       | 5 | 0.02733   | 0.8333 | 0.6328 | 0.66152 | 0.34313 | 0.21191  | 0.89111 | 0.75989 | 0.18068  | 0.080464  | 0.90652 | 0.86653 | 0.24969  | 0.56669  | 0.9664  | 1.3806  | 0.37373 | 0.32242 | 0.89688 | 0.83859 | 0.10927  | 0.082726  | 0.95054 |
| 6 | 138229155 | rs147904362      | 4 | 0.7145    | 0.834  | 0.8978 | --      | --      | --       | 1.3445  | 1.3727  | 0.63276  | 0.50855   | 0.24113 | 1.9516  | 0.099147 | 0.44014  | 1.0335  | 0.9257  | 0.95312 | 0.74779 | 0.76642 | 0.68961 | 0.51035  | 0.62041   |         |
| 6 | 138229183 | rs75424836       | 5 | 0.1589    | 0.8419 | 0.3336 | 0.43767 | 0.54241 | 0.13919  | 0.7938  | 0.69728 | 0.23291  | 0.098579  | 0.92671 | 0.92053 | 0.29089  | 0.8579   | 0.9448  | 1.6526  | 0.44078 | 0.21366 | 0.93155 | 0.86335 | 0.14101  | 0.22533   | 0.91959 |
| 6 | 138229640 | chr6:138229640:D | 4 | 0.3688    | 1.431  | 0.9536 | 1.5037  | 0.3682  | 0.76111  | 0.55571 | 0.87514 | 0.95588  | 0.73164   | 0.33201 | 1.6728  | 0.63296  | 0.26848  | 0.83354 | --      | --      | --      | --      | 1.5139  | 0.67954  | 0.12623   | 0.53001 |
| 6 | 138229819 | rs1561121        | 5 | 1.43E-07  | 1.1811 | 0.3598 | 1.1046  | 0.12975 | 0.7352   | 0.93725 | 1.2039  | 0.058246 | 0.0009599 | 0.95956 | 1.2539  | 0.08804  | 0.007996 | 0.99343 | 1.4171  | 0.11814 | 0.00384 | 0.99389 | 1.1318  | 0.039519 | 0.0000863 | 0.99359 |
| 6 | 138230316 | rs185233828      | 5 | 0.4954    | 1.3278 | 0.9607 | 2.9961  | 1.6804  | 0.64982  | 0.62476 | 1.2632  | 0.78582  | 0.88564   | 0.93453 | 1.1     | 1.2039   | 0.77567  | 0.9003  | 2.3856  | 1.1695  | 0.42638 | 0.9594  | 1.0741  | 0.64744  | 0.71051   | 0.78235 |
| 6 | 138230389 | rs7749323        | 5 | 0.07728   | 0.8266 | 0.2995 | 0.62723 | 0.37447 | 0.20487  | 0.90631 | 0.74678 | 0.19607  | 0.098687  | 0.92602 | 0.80745 | 0.26533  | 0.42833  | 0.97016 | 1.7863  | 0.383   | 0.12036 | 1       | 0.81192 | 0.11506  | 0.065316  | 0.95863 |
| 6 | 138231107 | rs6570193        | 5 | 1.90E-07  | 1.1823 | 0.3505 | 1.1079  | 0.12969 | 0.72089  | 0.93847 | 1.204   | 0.058237 | 0.0009563 | 0.95939 | 1.2536  | 0.088023 | 0.008609 | 0.99318 | 1.4207  | 0.11779 | 0.00362 | 1       | 1.1314  | 0.039524 | 0.0000889 | 0.9928  |
| 6 | 138231156 | rs183583779      | 2 | 0.7678    | 1.1731 | 0.5429 | --      | --      | --       | 0.9415  | 0.65043 | 0.85338  | 1.919     | 0.97288 | 0.11785 | 0.33389  | --       | --      | --      | --      | --      | --      | --      | --       | --        | --      |
| 6 | 138231784 | rs183623186      | 3 | 0.7295    | 1.202  | 0.7638 | --      | --      | --       | --      | --      | --       | --        | 1.3062  | 1.1322  | 0.58466  | 0.32641  | 5.7326  | 2.2564  | 0.00798 | 0.34957 | 1.0393  | 0.62547 | 0.27252  | 0.33115   |         |
| 6 | 138231813 | rs75618370       | 4 | 0.3995    | 0.6995 | 0.4925 | 0.41272 | 1.7868  | 0.50589  | 0.6452  | 1.4981  | 0.74884  | 0.42294   | 0.50548 | 0.16153 | 1.3144   | 0.013756 | 0.6844  | --      | --      | --      | --      | 0.62077 | 0.58889  | 0.20841   | 0.51718 |
| 6 | 138231897 | rs75631801       | 4 | 0.4612    | 0.7192 | 0.5516 | 0.30491 | 1.4779  | 0.3061   | 0.52368 | 1.4441  | 0.81951  | 0.40006   | 0.40946 | 0.1987  | 1.267    | 0.027125 | 0.67735 | --      | --      | --      | --      | 0.76703 | 0.64158  | 0.39304   | 0.46591 |
| 6 | 138232479 | rs6903624        | 5 | 9.89E-08  | 1.1839 | 0.3605 | 1.1275  | 0.12989 | 0.62884  |         |         |          |           |         |         |          |          |         |         |         |         |         |         |          |           |         |

|   |           |                  |   |           |        |        |         |         |          |         |         |          |           |         |         |          |          |         |         |         |         |         |         |          |           |         |
|---|-----------|------------------|---|-----------|--------|--------|---------|---------|----------|---------|---------|----------|-----------|---------|---------|----------|----------|---------|---------|---------|---------|---------|---------|----------|-----------|---------|
| 6 | 138239434 | rs6933987        | 5 | 2.06E-10  | 1.2203 | 0.488  | 1.0372  | 0.13909 | 0.98271  | 0.92979 | 1.2297  | 0.062751 | 0.0003989 | 0.94186 | 1.3539  | 0.094307 | 0.000744 | 0.97232 | 1.3463  | 0.12675 | 0.01812 | 1       | 1.1949  | 0.043077 | 9.45E-08  | 0.96689 |
| 6 | 138240127 | rs140540238      | 4 | 0.4493    | 1.3899 | 0.9599 | 1.498   | 1.367   | 0.76246  | 0.54583 | 0.86114 | 0.98173  | 0.68448   | 0.31422 | 1.6186  | 0.7013   | 0.28871  | 0.7272  | --      | --      | --      | --      | 1.5194  | 0.7652   | 0.1376    | 0.4487  |
| 6 | 138240198 | rs181280316      | 5 | 0.5025    | 0.8268 | 0.8752 | 0.22836 | 1.6449  | 0.48902  | 0.81964 | 0.5817  | 0.593    | 0.27241   | 0.80109 | 0.883   | 0.89843  | 0.75074  | 0.81996 | 1.0948  | 1.5282  | 0.84654 | 0.34186 | 0.97879 | 0.36398  | 0.76727   | 0.79873 |
| 6 | 138240225 | rs34261503       | 5 | 0.03597   | 0.8408 | 0.7217 | 0.90548 | 0.35136 | 0.73069  | 0.85016 | 0.7525  | 0.16051  | 0.049066  | 0.86975 | 0.73114 | 0.24717  | 0.11437  | 0.91292 | 1.3102  | 0.42918 | 0.31821 | 0.61388 | 0.88061 | 0.11349  | 0.11282   | 0.86332 |
| 6 | 138240233 | rs150333030      | 3 | 0.8589    | 0.9017 | 0.7166 | --      | --      | --       | --      | 1.3009  | 1.3745   | 0.64354   | 0.43706 | 1.3885  | 0.92992  | 0.81007  | 0.77445 | --      | --      | --      | --      | 0.52129 | 0.88902  | 0.15502   | 0.3447  |
| 6 | 138240240 | rs185973758      | 4 | 0.4935    | 0.7535 | 0.9927 | 0.76901 | 1.8317  | 0.78267  | 0.48603 | 0.74646 | 0.81034  | 0.62986   | 0.73167 | 1.0966  | 1.3251   | 0.94548  | 0.6035  | --      | --      | --      | 0.71019 | 0.53716 | 0.83865  | 0.68922   |         |
| 6 | 138240398 | rs187802024      | 3 | 0.5566    | 0.7216 | 0.6185 | --      | --      | --       | --      | 0.87001 | 0.66122  | 0.63515   | 0.41983 | 1.0183  | 1.3949   | 0.97981  | 0.40793 | 0.18588 | 1.4978  | 0.06863 | 0.41814 | --      | --       | --        | --      |
| 6 | 138240402 | rs76718750       | 5 | 0.8531    | 1.0125 | 0.4373 | 1.6911  | 0.30562 | 0.088313 | 0.80706 | 1.0316  | 0.13382  | 0.82016   | 0.83768 | 0.85037 | 0.26541  | 0.35039  | 0.79763 | 1.1441  | 0.25673 | 0.57038 | 0.84115 | 0.9656  | 0.089648 | 0.36068   | 0.86904 |
| 6 | 138241185 | rs4895499        | 5 | 0.1287    | 1.1371 | 0.1469 | 1.069   | 0.24468 | 0.81095  | 0.93013 | 1.3596  | 0.10871  | 0.0045631 | 1       | 1.2688  | 0.17332  | 0.12145  | 1       | 0.72864 | 0.25716 | 0.10412 | 0.78917 | 1.071   | 0.074995 | 0.24134   | 1       |
| 6 | 138241304 | rs182812357      | 4 | 0.2743    | 1.223  | 0.8019 | 0.87007 | 1.0234  | 0.65613  | 0.80556 | 1.2973  | 0.35035  | 0.3495    | 0.8325  | 0.85103 | 0.44287  | 0.7113   | 0.90758 | --      | --      | --      | --      | 1.3663  | 0.25574  | 0.29598   | 0.7854  |
| 6 | 138241676 | rs138935486      | 3 | 0.432     | 1.5318 | 0.9996 | 1.4855  | 1.3637  | 0.76814  | 0.53644 | --      | --       | --        | 1.552   | 0.80468 | 0.31698  | 0.6196   | --      | --      | --      | --      | 1.5274  | 0.87262 | 0.089333 | 0.37739   |         |
| 6 | 138242101 | rs142933666      | 3 | 0.4871    | 1.5069 | 0.9997 | 1.4796  | 1.3601  | 0.77113  | 0.53052 | --      | --       | --        | 1.4949  | 0.89329 | 0.34472  | 0.54432  | --      | --      | --      | --      | 1.5349  | 0.96285 | 0.059078 | 0.3345    |         |
| 6 | 138242161 | rs190632922      | 2 | 0.7193    | 0.9004 | 0.7252 | --      | --      | --       | --      | --      | --       | --        | 0.76222 | 0.55665 | 0.57954  | 0.57854  | --      | --      | --      | --      | 0.95915 | 0.34285 | 0.62379  | 0.48657   |         |
| 6 | 138242437 | rs6932056        | 5 | 0.03626   | 0.828  | 0.4011 | 0.60902 | 0.37412 | 0.16559  | 0.88771 | 0.77914 | 0.19951  | 0.14325   | 0.88111 | 0.83421 | 0.26697  | 0.51232  | 0.95711 | 1.7271  | 0.40726 | 0.12904 | 0.91368 | 0.81834 | 0.11652  | 0.085336  | 0.93812 |
| 6 | 138242487 | rs6909442        | 5 | 2.27E-07  | 1.2138 | 0.3068 | 0.99216 | 0.13929 | 0.7666   | 0.90383 | 1.2305  | 0.063158 | 0.0003131 | 0.91424 | 1.3259  | 0.90462  | 0.001659 | 0.95789 | 1.4023  | 0.12643 | 0.0067  | 1       | 1.1766  | 0.043342 | 5.62E-07  | 0.9842  |
| 6 | 138242623 | chr6:138242623:D | 5 | 2.68E-09  | 1.2101 | 0.4699 | 1.0188  | 0.14297 | 0.93324  | 0.89315 | 1.2029  | 0.064542 | 0.0012494 | 0.89328 | 1.3517  | 0.095732 | 0.000723 | 0.94181 | 1.3382  | 0.12752 | 0.02126 | 0.98248 | 1.1905  | 0.044123 | 1.24E-07  | 0.92983 |
| 6 | 138242638 | rs6570194        | 5 | 0.8896    | 0.9883 | 0.1426 | 1.3502  | 0.23864 | 0.29802  | 0.85108 | 0.99481 | 0.11479  | 0.8628    | 0.83303 | 0.7655  | 0.18541  | 0.092808 | 0.87913 | 1.359   | 0.21667 | 0.11035 | 0.88254 | 0.90357 | 0.073352 | 0.090058  | 0.87864 |
| 6 | 138242655 | rs111279038      | 2 | 0.4872    | 2.2732 | 0.8929 | --      | --      | --       | 2.6568  | 1.6551  | 0.141    | 0.3408    | --      | --      | --       | --       | --      | 1.9327  | 1.6882  | 0.5516  | 0.63497 | --      | --       | --        | --      |
| 6 | 138242998 | rs72980776       | 5 | 0.0002876 | 1.157  | 0.8593 | 0.96897 | 0.17527 | 0.76631  | 0.88724 | 1.1505  | 0.079538 | 0.057429  | 0.91566 | 1.227   | 0.11638  | 0.051053 | 0.94358 | 1.1434  | 0.16992 | 0.38677 | 0.89729 | 1.167   | 0.055982 | 0.0000722 | 0.91622 |
| 6 | 138243391 | rs117037483      | 5 | 0.7193    | 0.9242 | 0.4415 | 0.40083 | 0.74737 | 0.09784  | 0.70818 | 1.3807  | 0.48025  | 0.20325   | 0.53701 | 1.8285  | 0.65074  | 0.46266  | 0.77764 | 0.43181 | 0.9857  | 0.16683 | 0.55103 | 0.84021 | 0.29795  | 0.44474   | 0.73385 |
| 6 | 138243448 | rs142767035      | 4 | 0.7111    | 1.0885 | 0.9482 | 1.4494  | 0.76116 | 0.1976   | 0.59318 | 0.98982 | 0.48903  | 0.94147   | 0.40745 | 0.87589 | 0.56529  | 0.71006  | 0.47908 | --      | --      | --      | --      | 1.1536  | 0.31548  | 0.4044    | 0.39773 |
| 6 | 138243700 | rs61117627       | 5 | 0.04395   | 0.8244 | 0.3792 | 0.60446 | 0.38129 | 0.18743  | 0.89824 | 0.75757 | 0.2028   | 0.11429   | 0.88341 | 0.84182 | 0.26828  | 0.53977  | 0.95667 | 1.7901  | 0.42325 | 0.12226 | 0.91932 | 0.81734 | 0.11737  | 0.087424  | 0.93764 |
| 6 | 138243739 | rs58721818       | 5 | 0.03684   | 0.8251 | 0.3959 | 0.61222 | 0.3777  | 0.19296  | 0.89246 | 0.75922 | 0.20243  | 0.1103    | 0.86905 | 0.84685 | 0.26789  | 0.55458  | 0.95457 | 1.7681  | 0.42164 | 0.12326 | 0.90634 | 0.8182  | 0.11726  | 0.088306  | 0.9313  |
| 6 | 138243931 | rs76010350       | 5 | 0.08494   | 1.0982 | 0.5046 | 0.90347 | 0.26057 | 0.43303  | 0.8378  | 1.0868  | 0.10309  | 0.3885    | 0.87165 | 1.1536  | 0.16411  | 0.38756  | 0.90807 | 1.5466  | 0.21641 | 0.0262  | 0.86318 | 1.0648  | 0.076527 | 0.31143   | 0.87009 |
| 6 | 138244268 | rs192129270      | 5 | 0.3311    | 1.377  | 0.8318 | 1.4203  | 1.1214  | 0.71581  | 0.55045 | 1.4166  | 0.70309  | 0.37689   | 0.48462 | 0.55164 | 1.3619   | 0.81213  | 0.50425 | 3.4775  | 0.8771  | 0.02264 | 0.61505 | 1.1048  | 0.46588  | 0.59528   | 0.56691 |
| 6 | 138244373 | rs17066942       | 5 | 0.6613    | 0.9095 | 0.5026 | 0.42035 | 0.7466  | 0.10439  | 0.6952  | 1.3453  | 0.46856  | 0.22159   | 0.52572 | 1.7144  | 0.65239  | 0.51947  | 0.76542 | 0.44762 | 0.9904  | 0.17732 | 0.54348 | 0.82276 | 0.29335  | 0.36865   | 0.71731 |
| 6 | 138244569 | rs113473960      | 5 | 0.6589    | 0.9091 | 0.5237 | 0.42806 | 0.74649 | 0.10773  | 0.69311 | 1.3387  | 0.46652  | 0.22528   | 0.52314 | 1.6789  | 0.65256  | 0.53987  | 0.7623  | 0.44975 | 0.99125 | 0.18012 | 0.54353 | 0.82378 | 0.29255  | 0.36768   | 0.71462 |
| 6 | 138244766 | rs185973156      | 4 | 0.3177    | 0.57   | 0.3425 | 0.03099 | 1.7192  | 0.33179  | 0.50731 | 0.96001 | 0.98818  | 0.95262   | 0.57172 | 0.56775 | 1.3803   | 0.65101  | 0.65517 | --      | --      | --      | --      | 0.79107 | 0.74172  | 0.63505   | 0.59777 |
| 6 | 138244816 | rs67297943       | 5 | 2.50E-06  | 1.1819 | 0.6393 | 1.0351  | 0.15273 | 0.88297  | 0.85486 | 1.2031  | 0.070717 | 0.0027028 | 0.86276 | 1.3375  | 0.10328  | 0.002161 | 0.92868 | 1.1112  | 0.14931 | 0.41767 | 0.88092 | 1.1629  | 0.049278 | 6.29E-06  | 0.90108 |
| 6 | 138244943 | rs1545092        | 5 | 0.004078  | 1.0875 | 0.4824 | 1.029   | 1.02648 | 0.81948  | 1       | 1.146   | 0.061643 | 0.0088168 | 0.81534 | 1.3870  | 0.087228 | 0.077886 | 1       | 1.2343  | 0.12805 | 0.07671 | 0.82228 | 1.0446  | 0.039133 | 0.079014  | 1       |
| 6 | 138245149 | rs118049923      | 4 | 0.5605    | 1.5407 | 0.3107 | 0.52847 | 1.5104  | 0.63178  | 0.67027 | 9.205   | 1.1487   | 0.081252  | 0.77208 | --      | --       | --       | --      | 0.85743 | 1.9463  | 0.87065 | 0.39411 | 0.65301 | 1.1399   | 0.73383   | 0.43792 |
| 6 | 138245166 | rs113849526      | 5 | 0.4539    | 0.8317 | 0.3342 | 0.35865 | 0.75785 | 0.097996 | 0.76433 | 1.4116  | 0.47676  | 0.20966   | 0.58068 | 1.7225  | 0.63523  | 0.59425  | 0.83732 | 0.55529 | 1.0021  | 0.30858 | 0.5593  | 0.65959 | 0.28879  | 0.11735   | 0.82519 |
| 6 | 138245236 | rs112437718      | 5 | 0.4539    | 0.8318 | 0.3349 | 0.3597  | 0.75815 | 0.098312 | 0.76405 | 1.4116  | 0.47671  | 0.20953   | 0.58066 | 1.7234  | 0.63525  | 0.59357  | 0.8368  | 0.55539 | 1.0022  | 0.30878 | 0.55934 | 0.65952 | 0.28881  | 0.11713   | 0.82478 |
| 6 | 138245429 | rs111784190      | 5 | 0.4543    | 0.8324 | 0.3366 | 0.36227 | 0.75888 | 0.09922  | 0.7637  | 1.4114  | 0.47658  | 0.20976   | 0.58072 | 1.7263  | 0.63502  | 0.59085  | 0.835   | 0.55526 | 1.0022  | 0.30875 | 0.55945 | 0.65947 | 0.28881  | 0.11683   | 0.82382 |
| 6 | 138245745 | rs113164383      | 5 | 0.457     | 0.8336 | 0.3379 | 0.36559 | 0.76001 | 0.10028  | 0.76291 | 1.4109  | 0.47631  | 0.20993   | 0.58063 | 1.7331  | 0.6344   | 0.58505  | 0.83201 | 0.55526 | 1.0022  | 0.30877 | 0.55942 | 0.65933 | 0.28886  | 0.11631   | 0.82232 |
| 6 | 138245819 | rs191874643      | 2 | 0.6729    | 0.695  | 0.5855 | --      | --      | --       | 1.7601  | 1.9094  | 0.48839  | 0.41791   | --      | --      | --       | --       | --      | --      | --      | --      | --      | 0.54793 | 0.96582  | 0.18829   | 0.70398 |
| 6 | 138245873 | rs73566284       | 5 | 0.4522    | 1.0742 | 0.2799 | 2.0578  | 0.33477 | 0.104561 | 0.79879 | 1.118   | 0.1513   | 0.39095   | 0.81581 | 0.9003  | 0.28986  | 0.63263  | 0.85734 | 1.0962  | 0.28809 | 0.74234 | 0.88514 | 0.97498 | 0.099276 | 0.5895    | 0.87074 |
| 6 | 138245985 | rs17724565       | 5 | 0.3413    | 0.9446 | 0.813  | 0.88718 | 0.30925 | 0.70238  | 0.71063 | 0.95413 | 0.12811  | 0.63928   | 0.7215  | 0.86579 | 1.17508  | 0.36723  | 0.82825 | 0.68316 | 0.31577 | 0.07994 | 0.62532 | 0.90044 | 0.077915 | 0.60359   | 0.7913  |
| 6 | 138246311 | rs188381920      | 5 | 0.7014    | 1.1701 | 0.9812 | 1.2394  | 1.353   | 0.99894  | 0.68702 | 1.0386  | 0.82804  | 0.88747   | 0.92034 | 1.2125  | 1.1808   | 0.71333  | 0.92935 | 2.3023  | 1.1691  | 0.43736 | 0.94426 | 1.0646  | 0.63099  | 0.75815   | 0.71765 |
| 6 | 138246380 | rs193222784      | 4 | 0.7921    | 0.9236 | 0.3859 | 0.37069 | 1.2795  | 0.25814  | 0.69303 | 1.8324  | 0.60025  | 0.25042   | 0.85047 | --      | --       | --       | --      | 0.26565 | 1.1342  | 0.26859 | 0.86867 | 0.87792 | 0.37263  | 0.77197   | 0.92534 |
| 6 | 138246703 | rs73566286       | 5 | 0.7046    | 1.0302 | 0.5241 | 1.5817  | 0.33091 | 0.18867  | 0.74901 | 1.1604  | 0.14597  | 0.19911   | 0.76514 | 0.9749  | 0.32896  | 0.82498  | 0.76955 | 0.95521 | 0.31311 | 0.81697 | 0.71974 | 0.93758 | 0.10701  | 0.63172   | 0.80773 |
| 6 | 138247333 | rs183958676      | 4 | 0.3974    | 0.7588 | 0.7469 | 0.24778 | 1.428   | 0.22292  | 0.57603 | 0.86187 | 0.64048  | 0.69159   | 0.57339 | 1.6189  | 1.0382   | 0.46231  | 0       |         |         |         |         |         |          |           |         |

|   |           |                  |   |           |        |        |         |         |          |          |         |          |          |         |         |          |         |         |         |         |         |         |         |          |           |         |
|---|-----------|------------------|---|-----------|--------|--------|---------|---------|----------|----------|---------|----------|----------|---------|---------|----------|---------|---------|---------|---------|---------|---------|---------|----------|-----------|---------|
| 6 | 138255129 | rs118059819      | 4 | 0.7761    | 0.8999 | 0.8831 | 3.6032  | 2.2905  | 0.069358 | 0.3568   | 0.65777 | 0.81797  | 0.23549  | 0.41401 | 0.8272  | 0.53464  | 0.85757 | 0.85465 | 1.143   | 0.69263 | 0.78716 | 0.63189 | --      | --       | --        | --      |
| 6 | 138255215 | rs140351630      | 5 | 0.1058    | 0.5458 | 0.7007 | 0.07532 | 1.566   | 0.308    | 0.47581  | 0.45069 | 0.67288  | 0.017393 | 0.47155 | 0.5597  | 0.96181  | 0.25471 | 0.62279 | 0.57892 | 1.1192  | 0.27416 | 0.39814 | 0.84606 | 0.61578  | 0.72211   | 0.41935 |
| 6 | 138255237 | rs187974372      | 5 | 0.08351   | 1.1166 | 0.5776 | 1.4801  | 0.67851 | 0.42978  | 0.087106 | 0.28272 | 2.4261   | 0.86552  | 0.30137 | 0.7428  | 3.0454   | 0.75047 | 0.09803 | 0.89023 | 1.1153  | 0.19564 | 0.37355 | 0.86259 | 0.61578  | 0.72211   | 0.41935 |
| 6 | 138255536 | rs7750634        | 5 | 0.6299    | 1.1198 | 0.8978 | 1.3485  | 0.59049 | 0.62379  | 0.6632   | 1.208   | 0.37064  | 0.38247  | 0.55131 | 0.73903 | 0.91147  | 0.45972 | 0.4909  | 1.585   | 0.65132 | 0.16506 | 0.52178 | 0.81608 | 0.47467  | 0.49838   | 0.48221 |
| 6 | 138255904 | chr6:138255904:D | 2 | 0.9677    | 0.9756 | 0.6669 | --      | --      | --       | --       | 1.058   | 0.63823  | 0.86622  | 0.5996  | --      | --       | --      | --      | 0.41718 | 2.0656  | 0.52741 | 0.63021 | --      | --       | --        | --      |
| 6 | 138255957 | chr6:138255957:I | 5 | 0.6299    | 1.1198 | 0.898  | 1.3483  | 0.59043 | 0.62418  | 0.66313  | 1.2079  | 0.37061  | 0.38283  | 0.55139 | 0.73933 | 0.91093  | 0.46056 | 0.49144 | 1.5847  | 0.65133 | 0.16524 | 0.52172 | 0.81619 | 0.47479  | 0.49884   | 0.48225 |
| 6 | 138256788 | chr6:138256788:I | 5 | 0.08605   | 1.0506 | 0.5582 | 1.0799  | 0.1271  | 0.30109  | 0.9493   | 1.0974  | 0.05704  | 0.086719 | 0.96475 | 1.0361  | 0.089381 | 0.68608 | 0.96501 | 0.87911 | 0.11642 | 0.29745 | 0.95017 | 1.0503  | 0.039527 | 0.4859    | 0.96286 |
| 6 | 138256788 | chr6:138256788:I | 5 | 0.1725    | 1.0424 | 0.7175 | 1.0619  | 0.13571 | 0.36597  | 0.80571  | 1.0915  | 0.060491 | 0.074872 | 0.81869 | 1.0222  | 0.093835 | 0.7224  | 0.847   | 0.89489 | 0.12663 | 0.3123  | 0.79066 | 1.039   | 0.041608 | 0.53005   | 0.82738 |
| 6 | 138256803 | rs150427547      | 5 | 0.9043    | 0.9563 | 0.9961 | 1.0647  | 1.2995  | 0.91827  | 0.65477  | 0.82851 | 0.74055  | 0.56109  | 0.77463 | 1.4385  | 1.1584   | 0.58075 | 0.81366 | 1.0082  | 0.91156 | 0.96833 | 0.71993 | 0.90093 | 0.5919   | 0.93248   | 0.63506 |
| 6 | 138256822 | rs76182255       | 3 | 0.4893    | 1.4764 | 0.5232 | --      | --      | --       | --       | 2.9639  | 0.92048  | 0.19297  | 0.81635 | --      | --       | --      | --      | 2.6327  | 1.7681  | 0.32708 | 0.64181 | 0.80146 | 0.77868  | 0.90043   | 0.7057  |
| 6 | 138256975 | rs138167235      | 5 | 0.7147    | 0.9375 | 0.5542 | 0.31652 | 0.76052 | 0.085163 | 0.61505  | 1.1474  | 0.32327  | 0.56794  | 0.75658 | 1.5264  | 0.704    | 0.3699  | 0.61357 | 0.77048 | 0.63855 | 0.53928 | 0.65185 | 0.90603 | 0.24747  | 0.94567   | 0.71072 |
| 6 | 138257198 | rs146909079      | 2 | 2.5053    | 0.5554 | 0.5861 | --      | --      | --       | --       | --      | --       | --       | 1.5132  | 1.9103  | 0.64494  | 0.50237 | --      | --      | --      | --      | 0.51402 | 0.53092 | 0.080496 | 0.51044   |         |
| 6 | 138257448 | rs1579609        | 5 | 0.3       | 1.0394 | 0.2456 | 1.0555  | 0.12502 | 0.42018  | 0.98275  | 1.1155  | 0.056675 | 0.048666 | 0.98755 | 1.0156  | 0.088512 | 0.89247 | 0.99348 | 0.83038 | 0.11502 | 0.13995 | 0.98117 | 1.0478  | 0.039365 | 0.55442   | 0.99429 |
| 6 | 138257506 | rs1579610        | 5 | 0.2995    | 1.0394 | 0.2459 | 1.0555  | 0.12502 | 0.42019  | 0.98275  | 1.1155  | 0.056674 | 0.048666 | 0.98758 | 1.0156  | 0.08851  | 0.89261 | 0.9935  | 0.83048 | 0.11501 | 0.14022 | 0.98127 | 1.0478  | 0.039369 | 0.55519   | 0.99011 |
| 6 | 138257524 | rs185986163      | 4 | 0.6586    | 0.8569 | 0.3661 | --      | --      | --       | --       | 1.0424  | 0.67449  | 0.089366 | 0.49007 | 1.6676  | 0.65625  | 0.22343 | 0.74659 | 1.8697  | 1.0992  | 0.09693 | 0.96943 | 0.70051 | 0.54172  | 0.2599    | 0.47435 |
| 6 | 138257558 | rs9385811        | 5 | 0.0002759 | 1.181  | 0.7214 | 1.3309  | 0.19056 | 0.095805 | 0.93108  | 1.2029  | 0.090127 | 0.029193 | 0.93491 | 1.2272  | 0.14019  | 0.10127 | 0.93075 | 1.4444  | 0.20464 | 0.03532 | 0.91986 | 1.1248  | 0.062931 | 0.0057585 | 0.935   |
| 6 | 138257634 | rs61095626       | 5 | 0.7188    | 1.1116 | 0.9117 | 1.3838  | 0.59771 | 0.57322  | 0.66529  | 1.1115  | 0.51987  | 0.7249   | 0.46325 | 0.73347 | 0.92792  | 0.47032 | 0.52885 | 1.85    | 0.84208 | 0.07961 | 0.43088 | 0.79318 | 0.63065  | 0.53676   | 0.41467 |
| 6 | 138257828 | rs147499077      | 5 | 0.5896    | 0.9382 | 0.5712 | 0.61092 | 0.4659  | 0.10354  | 0.71057  | 1.2123  | 0.2411   | 0.27613  | 0.73119 | 1.2402  | 0.40797  | 0.6699  | 0.73403 | 0.76601 | 0.4266  | 0.34471 | 0.69114 | 0.86694 | 0.16186  | 0.43116   | 0.76997 |
| 6 | 138257968 | rs12194870       | 5 | 0.3321    | 0.9571 | 0.1131 | 0.96351 | 0.12444 | 0.8914   | 0.94528  | 1.0045  | 0.056515 | 0.75267  | 0.95021 | 0.9227  | 0.087676 | 0.30465 | 0.96573 | 0.73364 | 0.11878 | 0.00648 | 0.93626 | 1.0114  | 0.038619 | 0.41026   | 0.95883 |
| 6 | 138258223 | rs78905602       | 5 | 0.6581    | 0.9747 | 0.716  | 1.0026  | 0.30804 | 0.83832  | 0.65554  | 1.0065  | 1.19     | 0.9043   | 0.72474 | 0.84695 | 0.17219  | 0.23394 | 0.79005 | 0.73253 | 0.2882  | 0.08852 | 0.63786 | 1.0099  | 0.076828 | 0.76468   | 0.71665 |
| 6 | 138258333 | rs9376306        | 5 | 0.4348    | 1.0323 | 0.1856 | 1.0226  | 0.12605 | 0.52925  | 0.97785  | 1.113   | 0.056835 | 0.049678 | 0.9753  | 1.0216  | 0.088822 | 0.83602 | 0.98813 | 0.81066 | 0.11537 | 0.08877 | 0.95899 | 1.0505  | 0.039403 | 0.52042   | 0.98522 |
| 6 | 138258554 | rs9321635        | 5 | 0.2318    | 1.0438 | 0.2726 | 1.07    | 0.12535 | 0.36594  | 0.97243  | 1.1174  | 0.056624 | 0.047028 | 0.98919 | 1.0145  | 0.088583 | 0.89081 | 0.9903  | 0.83999 | 0.11499 | 0.16879 | 0.98229 | 1.0495  | 0.039447 | 0.50613   | 0.98507 |
| 6 | 138258580 | rs9321636        | 5 | 0.2802    | 1.0412 | 0.2432 | 1.0689  | 0.12564 | 0.35994  | 0.97548  | 1.1172  | 0.056609 | 0.045661 | 0.98971 | 1.013   | 0.088683 | 0.91625 | 0.99082 | 0.83273 | 0.11479 | 0.14696 | 0.98333 | 1.0494  | 0.039404 | 0.51798   | 0.98686 |
| 6 | 138258901 | rs73566302       | 5 | 0.8216    | 1.0686 | 0.9347 | 1.4296  | 0.60724 | 0.50241  | 0.65377  | 1.1207  | 0.51177  | 0.66798  | 0.42869 | 0.71674 | 0.93319  | 0.41549 | 0.51234 | 1.3942  | 0.85328 | 0.30187 | 0.37408 | 0.75171 | 0.63311  | 0.30187   | 0.36249 |
| 6 | 138259865 | rs7748190        | 5 | 0.2818    | 1.0409 | 0.2454 | 1.0657  | 0.12558 | 0.37474  | 0.97601  | 1.1171  | 0.056586 | 0.045948 | 0.99138 | 1.014   | 0.088682 | 0.9077  | 0.99007 | 0.83291 | 0.11476 | 0.14762 | 0.98418 | 1.0487  | 0.039404 | 0.53212   | 0.98627 |
| 6 | 138260036 | chr6:138260036:D | 5 | 0.05217   | 1.059  | 0.4086 | 1.0496  | 0.12955 | 0.46459  | 0.88812  | 1.1337  | 0.058759 | 0.014093 | 0.88872 | 1.0385  | 0.092504 | 0.71101 | 0.8927  | 0.8747  | 0.11936 | 0.25895 | 0.87065 | 1.053   | 0.040504 | 0.3291    | 0.88856 |
| 6 | 138260037 | rs973201         | 5 | 0.2889    | 1.0398 | 0.2588 | 1.0576  | 0.12509 | 0.41103  | 0.98132  | 1.1166  | 0.058173 | 0.053635 | 1       | 1.0161  | 0.088541 | 0.88961 | 0.99218 | 0.83313 | 0.11502 | 0.14725 | 0.98139 | 1.0474  | 0.039379 | 0.56229   | 0.98859 |
| 6 | 138260064 | rs7768443        | 4 | 0.179     | 0.9153 | 0.0651 | 0.92428 | 0.12241 | 0.76834  | 0.967    | --      | --       | --       | --      | 0.93966 | 0.086768 | 0.39238 | 0.97427 | 0.72185 | 0.11809 | 0.00413 | 0.94351 | 1.0022  | 0.038515 | 0.32357   | 0.9715  |
| 6 | 138260398 | rs185648689      | 3 | 0.9761    | 0.9774 | 0.8582 | 2.2537  | 1.8487  | 0.37534  | 0.52189  | 1.0958  | 1.4304   | 0.84373  | 0.34129 | --      | --       | --      | --      | --      | --      | --      | --      | 0.71182 | 1.0276   | 0.31704   | 0.49576 |
| 6 | 138260599 | rs9385812        | 5 | 0.2926    | 1.0402 | 0.243  | 1.0616  | 0.12515 | 0.39487  | 0.9799   | 1.1163  | 0.056723 | 0.04676  | 0.98637 | 1.0142  | 0.088712 | 0.90875 | 0.989   | 0.83106 | 0.11487 | 0.14243 | 0.98488 | 1.0489  | 0.039401 | 0.54364   | 0.98727 |
| 6 | 138260644 | rs9402929        | 5 | 0.2513    | 1.0438 | 0.2456 | 1.0725  | 0.12589 | 0.34357  | 0.97035  | 1.121   | 0.056782 | 0.038982 | 0.98439 | 1.0136  | 0.088919 | 0.91581 | 0.98439 | 0.83616 | 0.11502 | 0.15635 | 0.98282 | 1.0513  | 0.039516 | 0.51505   | 0.97978 |
| 6 | 138260702 | rs139364318      | 5 | 0.872     | 1.0037 | 0.7207 | 1.6225  | 0.7134  | 0.30764  | 0.66469  | 0.87093 | 0.37741  | 0.55984  | 0.65852 | 0.20237 | 0.59271  | 0.15797 | 0.72871 | 0.82046 | 0.09639 | 0.66374 | 0.4543  | 0.94418 | 0.25498  | 0.92259   | 0.70667 |
| 6 | 138260930 | rs115520261      | 5 | 0.653     | 1.1231 | 0.8363 | 1.3787  | 0.59138 | 0.62154  | 0.68053  | 1.2743  | 0.45526  | 0.34185  | 0.51465 | 0.73119 | 0.88842  | 0.49419 | 0.58209 | 1.7783  | 0.71156 | 0.08538 | 0.48218 | 0.76569 | 0.49563  | 0.50985   | 0.52298 |
| 6 | 138261193 | rs143730145      | 5 | 0.7373    | 1.1743 | 0.8474 | 3.2708  | 7.5808  | 0.02531  | 0.32857  | 1.4484  | 0.92785  | 0.35925  | 0.42865 | 3.4669  | 1.1713   | 0.21222 | 0.63388 | 0.64916 | 2.0336  | 0.59958 | 0.41848 | 0.77865 | 0.67296  | 0.64608   | 0.44711 |
| 6 | 138261483 | rs117718377      | 3 | 0.3929    | 1.6359 | 0.498  | --      | --      | --       | --       | 2.8953  | 1.1076   | 0.19151  | 0.72762 | 4.8851  | 1.4526   | 0.28125 | 0.73785 | --      | --      | --      | --      | 0.9246  | 0.76153  | 0.87166   | 0.6305  |
| 6 | 138261556 | rs181597259      | 3 | 0.5888    | 0.8837 | 0.9348 | --      | --      | --       | --       | 0.73795 | 0.558    | 0.22186  | 0.42971 | 0.86605 | 0.63409  | 0.74838 | 0.4524  | --      | --      | --      | --      | 0.92614 | 0.27291  | 0.38086   | 0.47395 |
| 6 | 138261793 | rs57178058       | 5 | 0.8676    | 0.9927 | 0.8203 | 0.98549 | 0.1858  | 0.77553  | 0.7639   | 1.0748  | 0.090129 | 0.22585  | 0.72808 | 1.0154  | 0.14644  | 0.92648 | 0.80957 | 0.90702 | 0.17757 | 0.46997 | 0.72024 | 0.96171 | 0.059612 | 0.27075   | 0.79216 |
| 6 | 138261913 | rs768754         | 5 | 0.2834    | 1.0419 | 0.2277 | 1.0828  | 0.12587 | 0.28618  | 0.97281  | 1.1186  | 0.057009 | 0.04155  | 0.9758  | 1.0122  | 0.088461 | 0.93851 | 0.98941 | 0.83155 | 0.11415 | 0.14642 | 1       | 1.0511  | 0.03942  | 0.51256   | 0.98474 |
| 6 | 138261938 | chr6:138261938:D | 5 | 0.7381    | 1.1727 | 0.8805 | 2.8163  | 1.3058  | 0.23956  | 0.52913  | 0.88586 | 0.72515  | 0.67658  | 0.46963 | 0.885   | 1.3897   | 0.85011 | 0.55597 | 2.3625  | 1.1661  | 0.08114 | 0.45349 | 0.6932  | 1.2258   | 0.56727   | 0.31163 |
| 6 | 138261949 | rs768755         | 5 | 0.1267    | 1.0509 | 0.3379 | 1.1476  | 0.12754 | 0.10793  | 0.94256  | 1.1023  | 0.057076 | 0.070018 | 0.95908 | 0.99466 | 0.089282 | 0.94368 | 0.97035 | 0.86103 | 0.11588 | 0.22496 | 0.96124 | 1.0585  | 0.039232 | 0.42599   | 0.96726 |
| 6 | 138262000 | rs191832776      | 2 | 0.8168    | 1.2177 | 0.8138 | --      | --      | --       | --       | 1.4692  | 1.1654   | 0.55278  | 0.55963 | --      | --       | --      | --      | --      | --      | --      | --      | 0.98354 | 1.2431   | 0.52222   | 0.52627 |
| 6 | 13826     |                  |   |           |        |        |         |         |          |          |         |          |          |         |         |          |         |         |         |         |         |         |         |          |           |         |

|   |           |                  |   |         |        |        |         |         |          |         |         |          |          |         |         |          |          |         |          |         |         |         |         |          |          |         |         |
|---|-----------|------------------|---|---------|--------|--------|---------|---------|----------|---------|---------|----------|----------|---------|---------|----------|----------|---------|----------|---------|---------|---------|---------|----------|----------|---------|---------|
| 6 | 138271512 | rs77820738       | 5 | 0.6455  | 0.9807 | 0.4956 | 0.81734 | 0.20455 | 0.34185  | 0.78731 | 0.98913 | 0.087049 | 0.93001  | 0.75691 | 0.88049 | 0.12827  | 0.18515  | 0.83198 | 0.79511  | 0.19661 | 0.13472 | 0.71557 | 1.0295  | 0.056555 | 0.87178  | 0.81218 |         |
| 6 | 138271534 | chr6:138271534:D | 2 | 0.8401  | 0.8292 | 0.7363 | 0.44711 | 2.0556  | 0.42367  | 0.43362 | 0.97139 | 1.0406   | 0.98043  | 0.41722 | --      | --       | --       | --      | --       | --      | --      | --      | --      | --       | --       | --      | --      |
| 6 | 138271575 | rs79238491       | 2 | 0.7696  | 0.7465 | 0.8593 | 0.51238 | 2.3465  | 0.58105  | 0.5083  | 0.81126 | 1.1028   | 0.71217  | 0.45005 | --      | --       | --       | --      | --       | --      | --      | --      | --      | --       | --       | --      | --      |
| 6 | 138271619 | rs75393223       | 5 | 0.3628  | 0.8119 | 0.9992 | 0.66774 | 0.98585 | 0.71025  | 0.75499 | 0.82378 | 0.44603  | 0.53585  | 0.68137 | 0.93885 | 0.87673  | 0.91457  | 0.73089 | 0.68109  | 1.4402  | 0.46605 | 0.30849 | 0.81359 | 0.29844  | 0.29757  | 0.83484 |         |
| 6 | 138271942 | rs75729799       | 4 | 0.8788  | 0.938  | 0.9181 | 0.41958 | 1.9158  | 0.41959  | 0.50961 | 1.3191  | 0.68799  | 0.48375  | 0.57315 | --      | --       | --       | --      | --       | 0.86378 | 1.0944  | 0.81978 | 0.49452 | 0.7867   | 0.63795  | 0.8152  | 0.48513 |
| 6 | 138272309 | rs78407156       | 3 | 0.5086  | 1.4148 | 0.5629 | --      | --      | --       | --      | 2.9347  | 0.90104  | 0.19557  | 0.82878 | --      | --       | --       | --      | --       | 1.6759  | 1.584   | 0.51017 | 0.59598 | 0.86244  | 0.71358  | 0.93172 | 0.83084 |
| 6 | 138272384 | rs78389939       | 5 | 0.6282  | 0.8373 | 0.9725 | 1.4859  | 1.7415  | 0.65853  | 0.35771 | 1.1351  | 0.83399  | 0.68363  | 0.39897 | 0.64897 | 1.3083   | 0.48642  | 0.59597 | 0.48541  | 1.1357  | 0.31898 | 0.56835 | 0.82666 | 0.48174  | 0.22889  | 0.56286 |         |
| 6 | 138272429 | chr6:138272429:D | 2 | 0.7651  | 0.7437 | 0.8551 | 0.50725 | 2.3177  | 0.57281  | 0.50464 | 0.81014 | 1.0364   | 0.7098   | 0.45215 | --      | --       | --       | --      | --       | --      | --      | --      | --      | --       | --       | --      | --      |
| 6 | 138272545 | rs189773651      | 2 | 0.6279  | 1.447  | 0.4616 | --      | --      | --       | --      | 0.78593 | 1.1263   | 0.77317  | 0.73656 | --      | --       | --       | --      | --       | --      | --      | --      | 2.4248  | 1.0358   | 0.10546  | 0.82655 |         |
| 6 | 138272804 | rs73778221       | 5 | 0.4255  | 1.056  | 0.9261 | 1.1856  | 0.33489 | 0.62717  | 0.80076 | 1.1359  | 0.14014  | 0.31063  | 0.92177 | 0.98589 | 0.17908  | 0.933    | 0.93571 | 0.8854   | 0.29856 | 0.57705 | 0.70544 | 1.0501  | 0.094636 | 0.22325  | 0.91058 |         |
| 6 | 138273051 | rs117127103      | 5 | 0.9596  | 1.0121 | 0.8727 | 0.86651 | 1.0115  | 0.61126  | 0.40386 | 0.85791 | 0.43907  | 0.4778   | 0.47101 | 1.2878  | 0.64206  | 0.41626  | 0.5375  | 2.3913   | 0.91647 | 0.07479 | 0.54178 | 0.9414  | 0.35751  | 0.83098  | 0.50395 |         |
| 6 | 138273090 | rs147425425      | 5 | 0.5591  | 1.1082 | 0.1778 | 0.53776 | 0.56369 | 0.33255  | 0.81215 | 1.1909  | 0.23615  | 0.35995  | 0.79918 | 1.7775  | 0.33322  | 0.06301  | 0.88945 | 1.7725   | 0.5459  | 0.17373 | 0.77062 | 0.86182 | 0.18051  | 0.19149  | 0.84613 |         |
| 6 | 138273506 | rs80208941       | 4 | 0.619   | 0.7811 | 0.9603 | 0.42641 | 1.5032  | 0.46544  | 0.33317 | --      | --       | --       | 0.96257 | 0.87694 | 0.99332  | 0.64479  | 0.51844 | 1.5878   | 0.2612  | 0.30063 | 0.84878 | 0.72353 | 0.64336  | 0.31074  |         |         |
| 6 | 138273624 | rs11759728       | 5 | 0.09868 | 0.9273 | 0.7461 | 0.84356 | 0.224   | 0.38001  | 0.71824 | 0.94063 | 0.094253 | 0.39521  | 0.72494 | 0.92743 | 0.13397  | 0.47389  | 0.821   | 0.71329  | 0.20792 | 0.03308 | 0.68281 | 0.94953 | 0.06124  | 0.15758  | 0.76494 |         |
| 6 | 138273928 | rs113792587      | 4 | 0.4819  | 1.2019 | 0.6815 | 0.70613 | 1.0008  | 0.68069  | 0.71317 | 1.8974  | 0.57341  | 0.12338  | 0.70552 | 2.2862  | 1.0525   | 0.27388  | 0.59649 | --       | --      | --      | --      | 1.036   | 0.32138  | 0.81723  | 0.74111 |         |
| 6 | 138273929 | rs12530156       | 5 | 0.1998  | 0.9637 | 0.7199 | 0.918   | 0.12655 | 0.70396  | 0.98465 | 1.0209  | 0.057037 | 0.66225  | 0.99247 | 0.91873 | 0.090702 | 0.21755  | 0.99076 | 0.87687  | 0.11879 | 0.30569 | 0.9753  | 0.96042 | 0.039508 | 0.12682  | 0.98997 |         |
| 6 | 138273965 | rs114311998      | 3 | 0.5858  | 1.344  | 0.6261 | --      | --      | --       | --      | 2.434   | 0.94993  | 0.30614  | 0.83459 | --      | --       | --       | 2.604   | 1.7219   | 0.2886  | 0.58651 | 0.85559 | 0.71589 | 0.92251  | 0.77265  |         |         |
| 6 | 138274155 | rs60067748       | 2 | 0.8867  | 0.8563 | 0.4027 | --      | --      | --       | --      | 1.7204  | 1.3718   | 0.43635  | 0.56067 | --      | --       | --       | 0.26022 | 1.7923   | 0.14372 | 0.34844 | --      | --      | --       | --       | --      |         |
| 6 | 138274190 | rs35901851       | 5 | 0.03511 | 0.8861 | 0.7125 | 0.77088 | 0.24648 | 0.40272  | 0.88999 | 0.90279 | 0.11796  | 0.3872   | 0.95536 | 0.86817 | 0.18186  | 0.30489  | 0.95057 | 1.2499   | 0.26367 | 0.35809 | 0.88019 | 0.86866 | 0.076585 | 0.044267 | 0.94977 |         |
| 6 | 138274693 | rs62434218       | 5 | 0.2092  | 0.9646 | 0.5953 | 0.91399 | 0.12592 | 0.66141  | 0.98838 | 1.0303  | 0.056722 | 0.54938  | 0.99596 | 0.91048 | 0.090343 | 0.19234  | 0.99489 | 0.86624  | 0.11802 | 0.26252 | 0.98254 | 0.96118 | 0.039359 | 0.1279   | 0.99332 |         |
| 6 | 138274856 | rs149860302      | 5 | 0.6496  | 0.9192 | 0.5051 | 0.48935 | 1.5465  | 0.42153  | 0.45391 | 1.1338  | 0.35705  | 0.6406   | 0.69701 | 1.4889  | 0.50512  | 0.23099  | 0.84968 | 0.30269  | 0.85056 | 0.09582 | 0.71365 | 0.82152 | 0.25421  | 0.15065  | 0.79524 |         |
| 6 | 138274881 | rs115369216      | 3 | 0.7602  | 0.7478 | 0.6449 | 1.9374  | 1.5892  | 0.83938  | 0.54884 | --      | --       | --       | 0.16033 | 2.1466  | 0.11409  | 0.53977  | --      | --       | --      | --      | 0.68519 | 1.4291  | 0.31808  | 0.35909  |         |         |
| 6 | 138274893 | chr6:138274893:D | 5 | 0.3932  | 0.9112 | 0.5717 | 0.60879 | 0.53256 | 0.38795  | 0.67871 | 0.93663 | 0.22771  | 0.75045  | 0.72535 | 0.94313 | 0.2831   | 0.76488  | 0.80673 | 2.2041   | 0.59244 | 0.0442  | 0.6305  | 0.87149 | 0.14722  | 0.25252  | 0.7601  |         |
| 6 | 138274920 | chr6:138274920:D | 5 | 0.03609 | 1.1411 | 0.8539 | 1.1818  | 0.2725  | 0.47746  | 0.91559 | 1.1335  | 0.12319  | 0.25432  | 0.87411 | 1.3241  | 0.20422  | 0.11525  | 0.94245 | 1.3873   | 0.27385 | 0.12967 | 0.83304 | 1.09    | 0.08587  | 0.097273 | 0.92474 |         |
| 6 | 138275085 | rs12190319       | 5 | 0.2064  | 0.9643 | 0.5841 | 0.9118  | 0.12594 | 0.64478  | 0.98926 | 1.0303  | 0.057026 | 0.55882  | 1       | 0.90994 | 0.90271  | 0.18969  | 0.99622 | 0.86326  | 0.11787 | 0.25087 | 0.98862 | 0.96179 | 0.039342 | 0.12998  | 0.99474 |         |
| 6 | 138275143 | rs76627349       | 5 | 0.9325  | 0.9881 | 0.6131 | 1.617   | 0.85494 | 0.11237  | 0.56137 | 1.1738  | 0.27172  | 0.3052   | 0.58515 | 0.57147 | 0.39371  | 0.015493 | 0.65968 | 0.99526  | 0.58647 | 0.98333 | 0.61198 | 1.0077  | 0.19726  | 0.81344  | 0.5744  |         |
| 6 | 138275195 | rs79045033       | 3 | 0.7615  | 0.7489 | 0.6453 | 1.9383  | 1.589   | 0.83958  | 0.54942 | --      | --       | --       | 0.16051 | 2.1478  | 0.11341  | 0.53706  | --      | --       | --      | --      | 0.68626 | 1.4302  | 0.31994  | 0.35925  |         |         |
| 6 | 138275323 | rs186121266      | 3 | 0.8313  | 1.1458 | 0.8717 | 1.0833  | 2.9018  | 0.74217  | 0.56017 | 1.6124  | 0.92058  | 0.30834  | 0.46227 | --      | --       | --       | --      | --       | --      | --      | --      | 0.81211 | 0.93177  | 0.33482  | 0.32385 |         |
| 6 | 138275349 | chr6:138275349:I | 4 | 0.6835  | 1.1266 | 0.7967 | 0.41105 | 1.2164  | 0.21439  | 0.3587  | 1.4408  | 0.53375  | 0.1392   | 0.46908 | 0.74814 | 1.1933   | 0.38164  | 0.36479 | --       | --      | --      | --      | 1.1441  | 0.38303  | 0.40848  | 0.51054 |         |
| 6 | 138275466 | rs149070366      | 4 | 0.9073  | 1.0497 | 0.945  | 2.776   | 1.8761  | 0.27997  | 0.3648  | 0.83201 | 1.0163   | 0.58349  | 0.32145 | 0.93838 | 0.63601  | 0.98134  | 0.77176 | 1.1718   | 0.69832 | 0.75343 | 0.65371 | --      | --       | --       | --      |         |
| 6 | 138275580 | rs148201202      | 5 | 0.6948  | 0.8454 | 0.3434 | 2.3715  | 1.698   | 0.23266  | 0.56081 | 0.54083 | 0.73816  | 0.29284  | 0.75678 | 4.6848  | 1.4945   | 0.36344  | 0.79236 | 0.081212 | 1.5468  | 0.05989 | 0.45635 | 1.0253  | 0.4934   | 0.97168  | 0.73778 |         |
| 6 | 138275617 | rs181294403      | 3 | 0.6849  | 1.2642 | 0.9557 | --      | --      | --       | --      | 1.0037  | 0.97572  | 0.97211  | 0.39325 | --      | --       | --       | --      | 1.2608   | 2.019   | 0.74294 | 0.38628 | 1.4587  | 0.76725  | 0.022002 | 0.4573  |         |
| 6 | 138275664 | rs147015654      | 4 | 0.2422  | 1.3404 | 0.4452 | 0.39189 | 1.4782  | 0.24963  | 0.41076 | 1.8515  | 0.4292   | 0.036051 | 0.66196 | 3.615   | 1.0343   | 0.11445  | 0.56086 | --       | --      | --      | --      | 1.0624  | 0.33129  | 0.36462  | 0.58979 |         |
| 6 | 138275746 | rs72982704       | 5 | 0.2643  | 0.9077 | 0.7404 | 0.85    | 0.42759 | 0.94141  | 0.71124 | 0.93194 | 0.17593  | 0.63356  | 0.78502 | 0.92404 | 0.24529  | 0.65575  | 0.83145 | 1.6407   | 0.4485  | 0.09964 | 0.67267 | 0.86341 | 0.11672  | 0.19647  | 0.79004 |         |
| 6 | 138275769 | rs6899975        | 5 | 0.1749  | 0.9618 | 0.5524 | 0.8961  | 0.12637 | 0.5559   | 1       | 1.0305  | 0.056948 | 0.54863  | 1       | 0.91047 | 0.090151 | 0.19325  | 1       | 0.86171  | 0.11753 | 0.24676 | 1       | 0.95866 | 0.039285 | 0.10716  | 1       |         |
| 6 | 138276433 | rs1495595453     | 2 | 0.514   | 2.0244 | 0.5413 | 3.4718  | 1.3955  | 0.087298 | 0.71546 | 0.90246 | 1.7079   | 0.8724   | 0.43294 | --      | --       | --       | --      | --       | --      | --      | --      | --      | --       | --       | --      |         |
| 6 | 138276464 | rs9389542        | 5 | 0.6445  | 1.0167 | 0.9505 | 0.99418 | 0.17274 | 0.64655  | 0.87289 | 0.997   | 0.68613  | 0.8817   | 0.982   | 0.96775 | 0.11044  | 0.91385  | 0.96655 | 1.1149   | 0.15822 | 0.42017 | 0.83023 | 1.0301  | 0.049704 | 0.18117  | 0.96012 |         |
| 6 | 138276508 | chr6:138276508:I | 5 | 0.195   | 0.9632 | 0.5437 | 0.90864 | 0.12659 | 0.65573  | 0.98668 | 1.0364  | 0.057087 | 0.48731  | 0.98544 | 0.9063  | 0.091573 | 0.17665  | 0.98237 | 0.86922  | 0.11794 | 0.27576 | 0.98986 | 0.95697 | 0.039609 | 0.09993  | 0.9852  |         |
| 6 | 138276556 | rs114280257      | 5 | 0.289   | 1.0747 | 0.9206 | 1.1404  | 0.33579 | 0.66503  | 0.7797  | 1.1603  | 0.13944  | 0.23653  | 0.91919 | 1.0214  | 0.17794  | 0.7325   | 0.92554 | 0.86988  | 0.29587 | 0.53006 | 0.71231 | 1.0704  | 0.093835 | 0.15296  | 0.90616 |         |
| 6 | 138276830 | rs74844351       | 3 | 0.4599  | 1.4872 | 0.5478 | --      | --      | --       | --      | 2.8889  | 0.90075  | 0.21207  | 0.85144 | --      | --       | --       | --      | 2.8151   | 1.8016  | 0.30254 | 0.63173 | 0.87812 | 0.72049  | 0.91088  | 0.84245 |         |
| 6 | 138277270 | rs35062368       | 5 | 0.1301  | 0.9458 | 0.6647 | 0.78766 | 0.17297 | 0.18968  | 0.81514 | 0.9646  | 0.075152 | 0.59213  | 0.80012 | 0.86099 | 0.11359  | 0.069406 | 0.85232 | 0.8864   | 0.16571 | 0.39121 | 0.74638 | 0.97429 | 0.049218 | 0.23722  | 0.8375  |         |
| 6 | 138277505 | rs56285314       | 5 | 0.8127  | 1.0109 | 0.6526 | 1.1502  | 0.19742 | 0.4412   | 0.72822 | 1.115   | 0.091103 | 0.11101  | 0.74309 | 0.99246 | 0.15068  | 0.82123  | 0.78739 | 0.90038  | 0.18244 | 0.4701  | 0.73118 | 0.96954 | 0.062069 | 0.50003  | 0.76483 |         |
| 6 | 138277512 | rs192855520      | 3 | 0.2249  | 0.5533 | 0.891  | --      | --      | --       | --      | 0.88657 | 1.5324   | 0.79357  | 0.32954 | 1.0442  | 2.0104   | 0.94752  | 0.45199 | --       | --      | --      | --      | 0.49997 | 0.53217  | 0.078302 | 0.5173  |         |

|   |           |                  |   |         |        |        |         |         |         |         |         |          |          |         |         |          |          |         |         |         |         |         |         |          |          |         |    |
|---|-----------|------------------|---|---------|--------|--------|---------|---------|---------|---------|---------|----------|----------|---------|---------|----------|----------|---------|---------|---------|---------|---------|---------|----------|----------|---------|----|
| 6 | 138284300 | rs187394954      | 2 | 0.06546 | 0.1652 | 0.8706 | --      | --      | --      | 0.15142 | 1.1135  | 0.046165 | 0.65901  | 0.22118 | 2.042   | 0.34142  | 0.74245  | --      | --      | --      | --      | --      | --      | --       | --       | --      | -- |
| 6 | 138284801 | rs114365174      | 4 | 0.62111 | 0.7453 | 0.9712 | 0.87583 | 2.3894  | 0.82416 | 0.37245 | --      | --       | --       | 0.58324 | 1.6356  | 0.35439  | 0.48066  | 1.5832  | 1.7196  | 0.66546 | 0.5849  | 0.6752  | 0.71806 | 0.293    | 0.33916  | --      | -- |
| 6 | 138284815 | rs193228009      | 2 | 0.03897 | 0.1332 | 0.7764 | --      | --      | --      | --      | 0.11458 | 1.1115   | 0.045884 | 0.70271 | 2.0422  | 0.34215  | 0.74245  | --      | --      | --      | --      | --      | --      | --       | --       | --      | -- |
| 6 | 138284899 | rs6911801        | 2 | 0.6406  | 0.6646 | 0.7315 | --      | --      | --      | --      | 0.82023 | 1.0687   | 0.6753   | 0.55097 | --      | --       | --       | --      | 0.43287 | 1.5253  | 0.27964 | 0.42089 | --      | --       | --       | --      | -- |
| 6 | 138284914 | rs12174430       | 5 | 0.3766  | 1.0294 | 0.9897 | 1.0012  | 0.15049 | 0.69263 | 0.95412 | 1.0305  | 0.063996 | 0.69702  | 0.98067 | 0.9848  | 0.097492 | 0.88954  | 0.98873 | 1.045   | 0.146   | 0.72458 | 0.8473  | 1.0399  | 0.045259 | 0.063372 | 0.98421 | -- |
| 6 | 138284972 | rs12176096       | 5 | 0.3759  | 1.0295 | 0.9907 | 1.0028  | 0.15066 | 0.70486 | 0.95445 | 1.0304  | 0.063994 | 0.69787  | 0.98065 | 0.98576 | 0.097504 | 0.88149  | 0.98859 | 1.0447  | 0.14602 | 0.72588 | 0.8471  | 1.0397  | 0.045264 | 0.064082 | 0.98105 | -- |
| 6 | 138284980 | rs1506693567     | 3 | 0.761   | 0.7437 | 0.6522 | 1.972   | 1.6342  | 0.80898 | 0.53386 | --      | --       | --       | 0.16115 | 2.1733  | 0.10478  | 0.52856  | --      | --      | --      | --      | 0.68078 | 1.4611  | 0.32682  | 0.36268  | --      | -- |
| 6 | 138285044 | rs9385813        | 5 | 0.7144  | 1.0132 | 0.9674 | 0.98188 | 1.12759 | 0.58402 | 0.87515 | 0.9978  | 0.068036 | 0.89198  | 0.99335 | 0.97182 | 0.11033  | 0.9451   | 0.96969 | 1.1033  | 0.15967 | 0.46237 | 0.82411 | 1.0244  | 0.049645 | 0.2136   | 0.96089 | -- |
| 6 | 138285059 | rs11754324       | 5 | 0.5965  | 0.9778 | 0.4956 | 0.79859 | 0.20666 | 0.28904 | 0.77323 | 0.97538 | 0.086735 | 0.75653  | 0.75246 | 0.89597 | 0.13012  | 0.23709  | 0.81851 | 0.78597 | 0.20007 | 0.10728 | 0.68512 | 1.0278  | 0.056412 | 0.96732  | 0.80008 | -- |
| 6 | 138285162 | rs192293807      | 5 | 0.9807  | 0.9941 | 0.9655 | 0.70782 | 1.1109  | 0.6969  | 0.42762 | 1.2557  | 0.53129  | 0.24722  | 0.39398 | 1.167   | 0.4887   | 0.57535  | 0.58249 | 0.87603 | 1.0909  | 0.81188 | 0.47154 | 0.85421 | 0.36837  | 0.36948  | 0.37772 | -- |
| 6 | 138285180 | rs117378298      | 5 | 0.4866  | 1.0684 | 0.3807 | 1.4018  | 0.36284 | 0.45875 | 0.81656 | 1.1719  | 0.17008  | 0.26881  | 0.81494 | 1.333   | 0.26416  | 0.22105  | 0.85563 | 1.4041  | 0.39076 | 0.23698 | 0.72553 | 0.88113 | 0.11319  | 0.17963  | 0.79098 | -- |
| 6 | 138285462 | rs9373202        | 5 | 0.6329  | 1.0172 | 0.9504 | 0.93227 | 1.01635 | 0.37912 | 0.90627 | 1.0068  | 0.068377 | 0.99767  | 1       | 0.98981 | 0.10918  | 0.89109  | 0.97624 | 1.1086  | 0.15884 | 0.42832 | 0.80035 | 1.0279  | 0.049265 | 0.18915  | 0.96765 | -- |
| 6 | 138285472 | rs140057729      | 4 | 0.4751  | 1.4231 | 0.07   | 0.11838 | 1.4966  | 0.24021 | 0.5129  | 1.8335  | 0.078785 | 0.75948  | 9.3288  | 1.0873  | 0.12981  | 0.71188  | --      | --      | --      | --      | 0.99778 | 0.34037 | 0.63708  | 0.65849  | --      | -- |
| 6 | 138285587 | rs9402931        | 5 | 0.4159  | 1.0263 | 0.9884 | 0.96998 | 1.42028 | 0.47243 | 0.99338 | 1.05    | 0.062115 | 0.47478  | 0.98722 | 1.0128  | 0.095945 | 0.71355  | 0.99637 | 1.0149  | 0.14014 | 0.90974 | 0.85585 | 1.0241  | 0.04417  | 0.10556  | 0.98822 | -- |
| 6 | 138285603 | rs73568231       | 5 | 0.4043  | 1.0588 | 0.9415 | 1.1484  | 0.33986 | 0.70454 | 0.79205 | 1.1281  | 1.14023  | 0.34184  | 0.93165 | 0.98719 | 0.17935  | 0.92255  | 0.9399  | 0.88429 | 0.29911 | 0.57097 | 0.69937 | 1.0614  | 0.094921 | 0.17073  | 0.91255 | -- |
| 6 | 138285706 | rs75766602       | 5 | 0.3592  | 0.7855 | 0.9212 | 0.78645 | 1.0491  | 0.75377 | 0.57424 | 0.99712 | 0.66051  | 0.96938  | 0.50934 | 0.28074 | 1.3652   | 0.016508 | 0.60844 | 1.6113  | 1.545   | 0.44975 | 0.44639 | 0.76314 | 0.31209  | 0.086861 | 0.74994 | -- |
| 6 | 138285800 | rs115428897      | 2 | 0.5969  | 0.6658 | 0.5863 | --      | --      | --      | --      | 0.94447 | 1.0022   | 0.85581  | 0.58131 | --      | --       | --       | --      | 0.40345 | 1.1996  | 0.25304 | 0.56585 | --      | --       | --       | --      | -- |
| 6 | 138285933 | rs142037724      | 2 | 0.6739  | 0.7395 | 0.8758 | --      | --      | --      | --      | 0.88381 | 1.3471   | 0.78994  | 0.3491  | --      | --       | --       | --      | --      | --      | --      | 0.68917 | 0.84721 | 0.52525  | 0.37238  | --      | -- |
| 6 | 138286309 | rs61656432       | 5 | 0.4071  | 1.0268 | 0.99   | 0.97662 | 1.14206 | 0.50217 | 0.99148 | 1.0513  | 0.06228  | 0.46784  | 0.98838 | 1.0157  | 0.095951 | 0.69244  | 0.99507 | 1.0116  | 0.13791 | 0.93875 | 0.85668 | 1.0236  | 0.044224 | 0.10804  | 0.9866  | -- |
| 6 | 138286512 | rs114910350      | 2 | 0.8206  | 0.8034 | 0.543  | --      | --      | --      | --      | 1.4103  | 1.3731   | 0.55591  | 0.42957 | --      | --       | --       | --      | 0.43537 | 1.3952  | 0.19101 | 0.35989 | --      | --       | --       | --      | -- |
| 6 | 138286623 | rs150376006      | 2 | 0.5105  | 0.5435 | 0.6734 | --      | --      | --      | --      | 0.70268 | 1.1088   | 0.5219   | 0.56251 | --      | --       | --       | --      | 0.30015 | 1.6859  | 0.15825 | 0.38161 | --      | --       | --       | --      | -- |
| 6 | 138286658 | rs138056137      | 3 | 0.7625  | 0.7444 | 0.6564 | 1.9669  | 1.6409  | 0.80987 | 0.53078 | --      | --       | --       | 0.1625  | 2.1786  | 0.10313  | 0.52527  | --      | --      | --      | --      | 0.6828  | 1.4655  | 0.32952  | 0.3603   | --      | -- |
| 6 | 138286814 | rs79538191       | 2 | 0.5649  | 1.4376 | 0.3865 | --      | --      | --      | --      | 3.0177  | 1.0634   | 0.22343  | 0.77002 | --      | --       | --       | --      | --      | --      | --      | --      | 0.96146 | 0.78327  | 0.76132  | 0.70096 | -- |
| 6 | 138286822 | rs75113464       | 2 | 0.5917  | 1.4025 | 0.4166 | --      | --      | --      | --      | 2.8076  | 1.062    | 0.23923  | 0.75312 | --      | --       | --       | --      | --      | --      | --      | --      | 0.96097 | 0.78378  | 0.7594   | 0.69852 | -- |
| 6 | 138286989 | rs117220738      | 5 | 0.3276  | 0.8281 | 0.9214 | 1.2702  | 0.91824 | 0.68525 | 0.54694 | 1.0212  | 0.36023  | 0.93515  | 0.63288 | 0.83596 | 0.50211  | 0.64978  | 0.70019 | 0.62148 | 0.76159 | 0.31536 | 0.59661 | 0.72376 | 0.28442  | 0.1324   | 0.60963 | -- |
| 6 | 138286994 | rs74815381       | 2 | 0.5936  | 0.6635 | 0.6059 | --      | --      | --      | --      | 0.92377 | 1.0014   | 0.81938  | 0.55955 | --      | --       | --       | --      | 0.41241 | 1.2002  | 0.25893 | 0.56189 | --      | --       | --       | --      | -- |
| 6 | 138287429 | rs4896305        | 5 | 0.7083  | 1.0109 | 0.5288 | 0.97626 | 1.12648 | 0.44003 | 0.9858  | 0.96911 | 0.065694 | 0.5103   | 0.97176 | 1.0393  | 0.088512 | 0.49106  | 0.99617 | 1.2321  | 0.12654 | 0.0626  | 0.8733  | 1.0101  | 0.040229 | 0.38572  | 0.94768 | -- |
| 6 | 138287457 | rs4896306        | 5 | 0.6725  | 1.0125 | 0.421  | 0.99373 | 1.12978 | 0.57133 | 0.95477 | 0.95397 | 0.057252 | 0.34727  | 0.95967 | 1.0193  | 0.088842 | 0.60427  | 0.98838 | 1.2524  | 0.12872 | 0.04628 | 0.85339 | 1.0221  | 0.040887 | 0.28756  | 0.94045 | -- |
| 6 | 138287560 | rs4895501        | 5 | 0.822   | 1.0065 | 0.679  | 0.97382 | 1.12589 | 0.42136 | 1       | 0.97819 | 0.065603 | 0.62157  | 0.97588 | 1.0291  | 0.08867  | 0.57008  | 1       | 1.1968  | 0.12527 | 0.11131 | 0.87701 | 1.002   | 0.040067 | 0.45828  | 0.95426 | -- |
| 6 | 138287625 | rs79165027       | 5 | 0.8278  | 1.0664 | 0.4622 | 1.0249  | 0.47313 | 0.90608 | 0.75672 | 1.3156  | 0.22401  | 0.13971  | 0.84048 | 1.5517  | 0.41365  | 0.44337  | 0.852   | 0.8472  | 0.478   | 0.54065 | 0.5862  | 0.85148 | 0.16937  | 0.48371  | 0.85037 | -- |
| 6 | 138287653 | rs4895502        | 5 | 0.1073  | 0.9202 | 0.942  | 0.83268 | 1.1586  | 0.16936 | 0.95268 | 0.95152 | 0.707099 | 0.46729  | 0.97922 | 0.98449 | 0.12161  | 0.96577  | 0.95928 | 0.96212 | 0.1721  | 0.76644 | 0.77538 | 0.94031 | 0.050866 | 0.11802  | 0.93437 | -- |
| 6 | 138287723 | rs111291290      | 5 | 0.126   | 1.2304 | 0.7373 | 0.90145 | 0.60606 | 0.95496 | 0.85022 | 1.1925  | 0.26072  | 0.4384   | 0.8529  | 2.0892  | 0.42577  | 0.88101  | 0.90721 | 1.4225  | 0.69726 | 0.34736 | 0.50214 | 1.1531  | 0.18429  | 0.33784  | 0.86478 | -- |
| 6 | 138287733 | rs138290523      | 2 | 0.6     | 1.4128 | 0.5053 | --      | --      | --      | --      | 2.6258  | 1.1401   | 0.36651  | 0.85901 | --      | --       | --       | --      | --      | --      | --      | --      | 1.0351  | 0.80771  | 0.66785  | 0.81803 | -- |
| 6 | 138287768 | rs182118113      | 3 | 0.9091  | 0.9126 | 0.9718 | --      | --      | --      | --      | 0.7934  | 1.364    | 0.58641  | 0.31213 | 0.74156 | 1.7047   | 0.6665   | 0.63275 | --      | --      | --      | --      | 1.1336  | 1.2163   | 0.95724  | 0.40215 | -- |
| 6 | 138287979 | rs180808891      | 3 | 0.8494  | 0.9078 | 0.9388 | 1.4185  | 2.4537  | 0.26481 | 0.32558 | --      | --       | --       | 1.2329  | 1.1965  | 0.64958  | 0.40104  | --      | --      | --      | --      | 0.82429 | 0.57881 | 0.50928  | 0.43712  | --      | -- |
| 6 | 138288270 | rs142773837      | 2 | 0.3457  | 0.3091 | 0.0955 | 0.07422 | 1.2506  | 0.16886 | 0.47951 | --      | --       | --       | --      | --      | --       | --       | --      | --      | --      | --      | 0.91624 | 0.84202 | 0.72654  | 0.30141  | --      | -- |
| 6 | 138288335 | chr6:138288335.D | 5 | 0.6691  | 0.9875 | 0.4519 | 0.97169 | 1.1312  | 0.9102  | 0.91622 | 1.0104  | 0.057023 | 0.80306  | 0.98718 | 1.0004  | 0.092286 | 0.92892  | 0.94839 | 0.78166 | 0.12678 | 0.04183 | 0.89629 | 0.99878 | 0.040581 | 0.33773  | 0.93372 | -- |
| 6 | 138288536 | rs11154948       | 5 | 0.6507  | 0.9857 | 0.3707 | 0.95255 | 1.13266 | 0.9844  | 0.90679 | 1.0224  | 0.057756 | 0.65818  | 1       | 0.97732 | 0.092627 | 0.71502  | 0.95523 | 0.76833 | 0.13016 | 0.02792 | 0.872   | 1.0006  | 0.040714 | 0.36786  | 0.9405  | -- |
| 6 | 138288651 | rs182614623      | 3 | 0.9913  | 0.9956 | 0.9492 | --      | --      | --      | --      | 1.1995  | 0.7211   | 0.59803  | 0.49372 | 0.82083 | 1.3548   | 0.80851  | 0.58217 | --      | --      | --      | --      | 0.93023 | 0.51824  | 0.45697  | 0.56307 | -- |
| 6 | 138288910 | rs4438977        | 5 | 0.6746  | 1.0125 | 0.4276 | 0.99324 | 1.12994 | 0.56985 | 0.95204 | 0.95456 | 0.057233 | 0.35261  | 0.95995 | 1.019   | 0.089051 | 0.60659  | 0.98351 | 1.2513  | 0.12874 | 0.04704 | 0.85343 | 1.0219  | 0.040949 | 0.29191  | 0.9364  | -- |
| 6 | 138288957 | rs4438978        | 5 | 0.6746  | 1.0125 | 0.4276 | 0.99318 | 1.12995 | 0.56955 | 0.95194 | 0.95457 | 0.057236 | 0.35266  | 0.95987 | 1.019   | 0.089059 | 0.60707  | 0.98332 | 1.2513  | 0.12874 | 0.04705 | 0.85341 | 1.0219  | 0.040951 | 0.29192  | 0.93627 | -- |
| 6 | 138289230 | rs117700977      | 3 | 0.8605  | 0.935  | 0.8961 | 1.0903  | 1.4601  | 0.81828 | 0.45643 | --      | --       | --       | 0.35148 | 2.1592  | 0.020367 | 0.4826   | --      | --      | --      | --      | 0.95617 | 0.40337 | 0.23763  | 0.61636  | --      | -- |
| 6 | 138289293 | rs117083320      | 5 | 0.1265  | 0.68   | 0.4968 | 1.2553  | 0.8678  | 0.94554 | 0.61825 | 1.5191  | 0.62     | 0.36073  | 0.7336  | 0.50801 | 0.6921   | 0.089891 | 0.77997 | 0.89424 | 0.80752 | 0.879   | 0.7536  | 0.48734 | 0.35022  | 0.05675  | 0.73755 | -- |
| 6 | 138289590 | rs117415570      | 5 |         |        |        |         |         |         |         |         |          |          |         |         |          |          |         |         |         |         |         |         |          |          |         |    |

|   |           |                   |   |        |        |        |         |         |          |         |          |          |          |         |         |          |          |         |         |         |         |         |          |           |           |         |
|---|-----------|-------------------|---|--------|--------|--------|---------|---------|----------|---------|----------|----------|----------|---------|---------|----------|----------|---------|---------|---------|---------|---------|----------|-----------|-----------|---------|
| 6 | 138295832 | rs4895503         | 5 | 0.9588 | 1.0015 | 0.447  | 0.9306  | 0.12924 | 0.31736  | 0.93318 | 0.95165  | 0.058168 | 0.32337  | 0.93759 | 1.0091  | 0.090031 | 0.693    | 0.95815 | 1.2293  | 0.12856 | 0.06417 | 0.84609 | 1.0122   | 0.041401  | 0.34313   | 0.91597 |
| 6 | 138295848 | rs12203917        | 5 | 0.5965 | 0.9843 | 0.4049 | 0.94133 | 0.13319 | 0.85053  | 0.88141 | 1.0075   | 0.057563 | 0.86468  | 0.96071 | 0.99066 | 0.09307  | 0.84867  | 0.93609 | 0.76997 | 0.12982 | 0.02888 | 0.86897 | 1        | 0.040983  | 0.3335    | 0.923   |
| 6 | 138296045 | rs114240663       | 2 | 0.5994 | 0.666  | 0.575  | --      | --      | --       | --      | 0.96788  | 1.0213   | 0.88534  | 0.51626 | --      | --       | --       | --      | 0.40248 | 1.1856  | 0.20939 | 0.51869 | --       | --        | --        | --      |
| 6 | 138296218 | rs189447885       | 3 | 0.9786 | 0.9906 | 0.7998 | --      | --      | --       | --      | 1.1506   | 0.93439  | 0.62167  | 0.32122 | 1.9065  | 1.1188   | 0.29285  | 0.51572 | --      | --      | --      | --      | 0.8844   | 0.40403   | 0.67906   | 0.51444 |
| 6 | 138296549 | rs9484103         | 5 | 0.927  | 1.0113 | 0.5096 | 0.97303 | 0.48177 | 0.78439  | 0.74004 | 1.2922   | 0.22944  | 0.16443  | 0.81992 | 1.5199  | 0.42544  | 0.45505  | 0.81435 | 0.78681 | 0.48164 | 0.40259 | 0.60798 | 0.85355  | 0.17311   | 0.46885   | 0.82674 |
| 6 | 138296572 | rs189418074       | 3 | 0.836  | 0.8957 | 0.8157 | 1.0812  | 0.93632 | 0.72347  | 0.65282 | 1.0843   | 0.80291  | 0.88053  | 0.5192  | 0.48797 | 1.0901   | 0.050186 | 0.35281 | --      | --      | --      | --      | --       | --        | --        | --      |
| 6 | 138296724 | rs181457833       | 4 | 0.7052 | 1.1944 | 0.3021 | 0.38258 | 1.9711  | 0.49821  | 0.4243  | 0.46204  | 0.74385  | 0.1211   | 0.64707 | --      | --       | --       | --      | 1.2333  | 1.3765  | 0.80031 | 0.63545 | 2.2734   | 0.48445   | 0.0045146 | 0.68475 |
| 6 | 138296913 | rs143479828       | 2 | 0.7084 | 1.7644 | 0.4302 | 0.40716 | 2.0001  | 0.60592  | 0.60695 | --       | --       | --       | --      | --      | --       | --       | --      | 4.6905  | 1.9598  | 0.37009 | 0.76411 | --       | --        | --        | --      |
| 6 | 138296935 | chr6:138296935:1  | 5 | 0.7964 | 0.9921 | 0.8037 | 0.89305 | 0.13133 | 0.19625  | 0.89144 | 0.98638  | 0.059744 | 0.76473  | 0.8887  | 1.0056  | 0.091734 | 0.80944  | 0.90634 | 1.1338  | 0.13671 | 0.2371  | 0.79573 | 0.9903   | 0.04248   | 0.8036    | 0.86659 |
| 6 | 138297509 | rs182357531       | 2 | 0.6871 | 0.6294 | 0.633  | --      | --      | --       | --      | 0.37538  | 1.579    | 0.18905  | 0.45009 | --      | --       | --       | --      | --      | --      | --      | --      | 1.1275   | 1.6771    | 0.58724   | 0.41202 |
| 6 | 138297840 | rs4896307         | 5 | 0.7324 | 0.9862 | 0.8376 | 1.0063  | 0.1757  | 0.74281  | 0.79743 | 0.94011  | 0.078851 | 0.39329  | 0.8693  | 1.0638  | 0.11591  | 0.42811  | 0.90861 | 1.1397  | 0.18613 | 0.30338 | 0.67211 | 0.97731  | 0.057057  | 0.65109   | 0.84551 |
| 6 | 138297933 | rs115455547       | 2 | 0.7235 | 1.7077 | 0.432  | 0.40126 | 2.3844  | 0.59828  | 0.59733 | --       | --       | --       | --      | --      | --       | --       | --      | 4.5276  | 1.9564  | 0.37561 | 0.76004 | --       | --        | --        | --      |
| 6 | 138298302 | rs115149511       | 5 | 0.6023 | 0.9845 | 0.4882 | 0.96445 | 0.13402 | 0.95006  | 0.84814 | 1.006    | 0.057956 | 0.88311  | 0.92987 | 1.0031  | 0.09228  | 0.96296  | 0.92393 | 0.77622 | 0.1335  | 0.02712 | 0.80969 | 0.99437  | 0.041145  | 0.29129   | 0.90513 |
| 6 | 138298349 | chr6:138298349:1  | 5 | 0.4651 | 0.9738 | 0.85   | 0.83197 | 0.15777 | 0.10763  | 0.86332 | 0.99931  | 0.069459 | 0.98743  | 0.87145 | 1.027   | 0.12314  | 0.65712  | 0.85469 | 0.94059 | 0.17038 | 0.57875 | 0.6575  | 0.9706   | 0.049422  | 0.22193   | 0.85291 |
| 6 | 138298368 | rs9373204         | 5 | 0.1502 | 0.9495 | 0.9273 | 0.83428 | 0.15601 | 0.14795  | 0.95271 | 0.068601 | 0.47611  | 0.966    | 0.98911 | 0.1212  | 0.96517  | 0.96017  | 0.91166 | 0.17555 | 0.44748 | 0.70679 | 0.95666 | 0.049006 | 0.12588   | 0.95402   | 0.95402 |
| 6 | 138298470 | rs78264649        | 4 | 0.9364 | 1.0211 | 0.9966 | 1.0848  | 1.5193  | 0.80531  | 0.34005 | 0.92885  | 0.48883  | 0.70662  | 0.36051 | 1.0204  | 0.87317  | 0.96207  | 0.37836 | --      | --      | --      | --      | 1.0661   | 0.3407    | 0.74073   | 0.38309 |
| 6 | 138298558 | chr6:138298558:5  | 5 | 0.9155 | 1.0042 | 0.8702 | 1.0276  | 0.17886 | 0.8484   | 0.78169 | 0.95737  | 0.07469  | 0.54197  | 0.89163 | 1.0696  | 0.11507  | 0.408    | 0.91486 | 1.1551  | 0.18972 | 0.25708 | 0.67586 | 0.99995  | 0.05514   | 0.80019   | 0.86839 |
| 6 | 138298669 | rs117599675       | 5 | 0.8483 | 0.9754 | 0.404  | 0.61183 | 0.5026  | 0.10085  | 0.6449  | 1.2635   | 0.2488   | 0.20271  | 0.75411 | 1.6672  | 0.4578   | 0.33224  | 0.75168 | 0.81954 | 0.47134 | 0.50301 | 0.64259 | 0.8508   | 0.18197   | 0.48937   | 0.78598 |
| 6 | 138298682 | rs9376310         | 5 | 0.3073 | 0.9678 | 0.8242 | 0.88021 | 0.1586  | 0.29727  | 0.75581 | 0.9624   | 0.061739 | 0.48039  | 0.989   | 0.91932 | 0.10095  | 0.4424   | 0.98967 | 1.1189  | 0.15716 | 0.31434 | 0.72117 | 0.97584  | 0.043328  | 0.97364   | 0.98499 |
| 6 | 138298736 | rs6902231         | 5 | 0.1751 | 0.9525 | 0.8739 | 0.8081  | 0.15535 | 0.09485  | 0.95659 | 0.96572  | 0.608329 | 0.60363  | 0.96791 | 0.97785 | 0.12089  | 0.95772  | 0.95351 | 0.97127 | 0.17416 | 0.80024 | 0.69187 | 0.95572  | 0.04884   | 0.11414   | 0.97489 |
| 6 | 138298788 | rs192017571       | 5 | 0.6159 | 1.2248 | 0.9816 | 1.2665  | 1.3468  | 0.94313  | 0.6806  | 1.1502   | 0.83197  | 0.99302  | 0.84962 | 1.2356  | 1.1851   | 0.69618  | 0.89808 | 2.427   | 1.1781  | 0.3848  | 0.89481 | 1.0453   | 0.60943   | 0.64048   | 0.6395  |
| 6 | 138298871 | rs148417196       | 2 | 0.6624 | 1.4501 | 0.8509 | --      | --      | --       | --      | 1.8852   | 1.6353   | 0.23507  | 0.33112 | --      | --       | --       | --      | --      | --      | --      | --      | 1.3154   | 0.99687   | 0.9054    | 0.4337  |
| 6 | 138299093 | rs9399229         | 5 | 0.3883 | 0.9729 | 0.746  | 0.9128  | 0.15327 | 0.43736  | 0.77356 | 0.96341  | 0.061822 | 0.48269  | 1       | 0.91583 | 0.10028  | 0.42193  | 1       | 1.1631  | 0.15325 | 0.17193 | 0.71522 | 0.97958  | 0.042991  | 0.92267   | 1       |
| 6 | 138299226 | rs9376311         | 5 | 0.2976 | 0.9673 | 0.7797 | 0.90885 | 0.15296 | 0.4156   | 0.76954 | 0.95372  | 0.061662 | 0.39269  | 0.98769 | 0.92677 | 0.10075  | 0.50333  | 0.98912 | 1.1554  | 0.15329 | 0.19035 | 0.7113  | 0.97285  | 0.043157  | 0.95212   | 0.98455 |
| 6 | 138299866 | rs139801212       | 2 | 0.7509 | 0.7533 | 0.2493 | --      | --      | --       | --      | --       | --       | --       | --      | 4.445   | 1.8269   | 0.26435  | 0.48065 | --      | --      | --      | --      | 0.48103  | 0.62272   | 0.054709  | 0.47309 |
| 6 | 138299915 | rs6931591         | 5 | 0.2833 | 0.9617 | 0.827  | 0.80925 | 0.15616 | 0.12677  | 1       | 0.97273  | 0.06945  | 0.68732  | 1       | 1.0171  | 0.12181  | 0.75812  | 1       | 0.93086 | 0.18794 | 0.5604  | 0.68296 | 0.96601  | 0.04943   | 0.16816   | 1       |
| 6 | 138300165 | rs9321638         | 5 | 0.2491 | 0.9597 | 0.9612 | 0.88036 | 0.15337 | 0.29514  | 0.82732 | 0.94051  | 0.068302 | 0.31168  | 0.86896 | 0.94243 | 0.11821  | 0.67925  | 0.86804 | 0.98309 | 0.16474 | 0.87571 | 0.63124 | 0.97912  | 0.048907  | 0.1567    | 0.86807 |
| 6 | 138300251 | rs149918246       | 4 | 0.6304 | 1.1074 | 0.6705 | 2.2651  | 0.6796  | 0.025781 | 0.5662  | 0.99471  | 0.45666  | 0.97655  | 0.38861 | 1.5389  | 0.74924  | 0.24577  | 0.42977 | --      | --      | --      | --      | 0.98223  | 0.27199   | 0.68602   | 0.45756 |
| 6 | 138300252 | rs11154952        | 5 | 0.9931 | 0.9996 | 0.8967 | 1.0616  | 0.1832  | 0.95639  | 0.73611 | 0.9557   | 0.079933 | 0.50031  | 0.81628 | 1.0583  | 0.11829  | 0.45997  | 0.85637 | 1.1288  | 0.18925 | 0.33387 | 0.6596  | 0.99249  | 0.056863  | 0.66531   | 0.80372 |
| 6 | 138300300 | rs184174120       | 2 | 0.797  | 0.8006 | 0.643  | 1.7166  | 1.8591  | 0.42088  | 0.55114 | --       | --       | --       | --      | --      | --       | --       | --      | --      | --      | --      | --      | 0.64858  | 0.97667   | 0.42483   | 0.38803 |
| 6 | 138300355 | rs11154953        | 5 | 0.4552 | 0.9775 | 0.6243 | 0.92324 | 0.13725 | 0.77426  | 0.82151 | 1.006    | 0.059254 | 0.861    | 0.89041 | 1.012   | 0.094949 | 0.89497  | 0.88644 | 0.80966 | 0.13107 | 0.06886 | 0.8319  | 0.98084  | 0.041983  | 0.11517   | 0.86542 |
| 6 | 138300518 | rs116882754       | 5 | 0.3139 | 0.9175 | 0.9609 | 1.6622  | 0.75377 | 0.10887  | 0.59167 | 1.3431   | 0.35495  | 0.12429  | 0.52627 | 0.91463 | 0.48656  | 0.699    | 0.67726 | 1.0902  | 0.88061 | 0.75732 | 0.37041 | 1.1716   | 0.23734   | 0.104804  | 0.61194 |
| 6 | 138300674 | rs116176671       | 2 | 0.8105 | 0.8013 | 0.5901 | --      | --      | --       | --      | 1.2132   | 1.2027   | 0.63581  | 0.3367  | --      | --       | --       | --      | 0.44108 | 1.4429  | 0.19679 | 0.34715 | --       | --        | --        | --      |
| 6 | 138300822 | rs189551259       | 5 | 0.5795 | 1.4664 | 0.4878 | --      | --      | --       | --      | 0.9271   | 1.2123   | 0.092511 | 0.47312 | --      | --       | --       | --      | --      | --      | --      | --      | 1.0518   | 0.84058   | 0.87385   | 0.46808 |
| 6 | 138301002 | rs75262935        | 5 | 0.3394 | 0.7849 | 0.6618 | 0.24793 | 0.89475 | 0.11004  | 0.74124 | 1.2082   | 0.58031  | 0.54696  | 0.54193 | 0.63297 | 0.78056  | 0.37312  | 0.68269 | 0.59372 | 1.1498  | 0.4229  | 0.49957 | 0.85099  | 0.33434   | 0.32938   | 0.568   |
| 6 | 138301197 | rs142335309       | 2 | 0.3247 | 5.8776 | 0.0112 | 30.051  | 0.96872 | 0.045895 | 0.78608 | 0.98292  | 0.93736  | 0.92735  | 0.34121 | --      | --       | --       | --      | --      | --      | --      | --      | --       | --        | --        | --      |
| 6 | 138301512 | rs9402932         | 5 | 0.9103 | 0.995  | 0.9446 | 0.88481 | 0.19121 | 0.24295  | 0.49698 | 0.96526  | 0.086559 | 0.43051  | 0.53448 | 1.0554  | 0.13074  | 0.39285  | 0.59998 | 1.0018  | 0.21995 | 0.99862 | 0.38063 | 1.0085   | 0.060405  | 0.73751   | 0.54746 |
| 6 | 138301760 | rs184108140       | 2 | 0.6056 | 0.5848 | 0.523  | --      | --      | --       | --      | 0.2453   | 1.7115   | 0.039864 | 0.33248 | --      | --       | --       | --      | --      | --      | --      | --      | 0.97106  | 1.3077    | 0.73825   | 0.37493 |
| 6 | 138301921 | rs72982716        | 5 | 0.552  | 1.0428 | 0.8467 | 1.2087  | 0.30517 | 0.95307  | 0.79909 | 1.128    | 0.13528  | 0.3109   | 0.80746 | 1.0185  | 0.20774  | 0.96801  | 0.84475 | 1.2768  | 0.34964 | 0.11985 | 0.41746 | 0.97551  | 0.097693  | 0.6888    | 0.79296 |
| 6 | 138302064 | rs185837459       | 2 | 0.9358 | 0.9655 | 0.8059 | --      | --      | --       | --      | --       | --       | --       | --      | 1.3947  | 1.5595   | 0.55828  | 0.37936 | --      | --      | --      | --      | 0.93576  | 0.45455   | 0.71306   | 0.47183 |
| 6 | 138302121 | rs72982717        | 5 | 0.5843 | 1.0399 | 0.8604 | 1.2336  | 0.31556 | 0.81878  | 0.76815 | 1.108    | 0.13747  | 0.38471  | 0.77409 | 1.0762  | 0.22314  | 0.80251  | 0.78666 | 1.2402  | 0.34111 | 0.17106 | 0.40849 | 0.96954  | 0.098149  | 0.74135   | 0.78096 |
| 6 | 138302166 | rs142484014       | 2 | 0.9801 | 0.9773 | 0.7055 | --      | --      | --       | --      | 0.8286   | 1.0193   | 0.66677  | 0.4175  | --      | --       | --       | --      | 2.0357  | 2.1493  | --      | --      | 2.0357   | 0.0012377 | 0.38566   | --      |
| 6 | 138302304 | chr6:138302304:10 | 5 | 0.5732 | 1.0408 | 0.8431 | 1.2319  | 0.31267 | 0.82802  | 0.77969 | 1.1154   | 0.13624  | 0.35439  | 0.78555 | 1.0794  | 0.22088  | 0.79196  | 0.79734 | 1.241   | 0.34144 | 0.16944 | 0.40766 | 0.96724  | 0.097517  | 0.71876   | 0.79264 |
| 6 | 138302310 | chr6:138302310:5  | 5 | 0.5734 | 1.0408 | 0.8433 | 1.2318  | 0.31258 | 0.82839  | 0.78009 | 1.1153   | 0.13621  | 0.35512  | 0.7859  |         |          |          |         |         |         |         |         |          |           |           |         |

|   |           |             |   |        |        |        |         |         |         |         |         |          |          |         |         |          |          |         |         |         |         |         |         |          |          |         |
|---|-----------|-------------|---|--------|--------|--------|---------|---------|---------|---------|---------|----------|----------|---------|---------|----------|----------|---------|---------|---------|---------|---------|---------|----------|----------|---------|
| 6 | 138307455 | rs6919895   | 5 | 0.315  | 0.9529 | 0.7271 | 0.90278 | 0.24403 | 0.41811 | 0.42999 | 0.87541 | 0.080213 | 0.038929 | 0.77147 | 1.0464  | 0.15967  | 0.70865  | 0.48289 | 0.94762 | 0.24758 | 0.60868 | 0.3864  | 1.0027  | 0.069579 | 0.63772  | 0.47433 |
| 6 | 138307548 | rs141350424 | 3 | 0.891  | 1.0513 | 0.9828 | --      | --      | --      | --      | 1.1199  | 0.60451  | 0.5735   | 0.33574 | --      | --       | --       | --      | 0.86239 | 1.304   | 0.83768 | 0.44919 | 1.0372  | 0.4902   | 0.97001  | 0.35077 |
| 6 | 138307566 | rs145085464 | 6 | 0.9236 | 1.0087 | 0.841  | 0.92723 | 0.40336 | 0.94447 | 0.41711 | 0.93053 | 0.17228  | 0.38032  | 0.44979 | 0.95731 | 0.27821  | 0.69017  | 0.41842 | 1.4771  | 0.36308 | 0.00466 | 0.39553 | 1.0252  | 1.12639  | 0.61002  | 0.40535 |
| 6 | 138307615 | rs189983218 | 3 | 0.4132 | 0.6701 | 0.6083 | --      | --      | --      | --      | 0.40946 | 0.69818  | 0.005966 | 0.43502 | 0.89482 | 1.6153   | 0.97981  | 0.46701 | --      | --      | --      | --      | 1.1228  | 0.75748  | 0.56624  | 0.37821 |
| 6 | 138308227 | rs139040908 | 5 | 0.7606 | 1.0109 | 0.9704 | 0.96161 | 0.14895 | 0.916   | 0.6549  | 1.0051  | 0.077935 | 0.84918  | 0.48611 | 1.0734  | 0.10398  | 0.3917   | 0.68185 | 1.0539  | 0.18249 | 0.45464 | 0.38314 | 1.003   | 0.04655  | 0.78866  | 0.6665  |
| 6 | 138308358 | rs14612636  | 5 | 0.6225 | 1.0554 | 0.9903 | 1.0785  | 0.52223 | 0.65184 | 0.40022 | 1.0732  | 0.21188  | 0.47727  | 0.45262 | 1.1034  | 0.30272  | 0.52488  | 0.48635 | 1.3063  | 0.48972 | 0.14329 | 0.39499 | 1.0115  | 0.15389  | 0.95119  | 0.41914 |
| 6 | 138308568 | rs138881201 | 5 | 0.1374 | 0.9247 | 0.5585 | 0.86477 | 0.27264 | 0.30259 | 0.40913 | 0.83255 | 0.085383 | 0.012879 | 0.84574 | 1.0208  | 0.187    | 0.98254  | 0.45882 | 0.8604  | 0.27502 | 0.17806 | 0.37486 | 1.0018  | 0.077223 | 0.66507  | 0.45683 |
| 6 | 138308585 | rs9494909   | 5 | 0.7792 | 1.0096 | 0.8409 | 0.96421 | 0.14054 | 0.8289  | 0.74106 | 1.0022  | 0.075028 | 0.89958  | 0.52884 | 1.1206  | 0.095955 | 0.14477  | 0.76924 | 0.99589 | 0.18105 | 0.99664 | 0.38839 | 0.99576 | 0.044534 | 0.7498   | 0.75333 |
| 6 | 138308749 | rs7766322   | 5 | 0.4147 | 1.0564 | 0.7838 | 1.1948  | 0.2953  | 0.93434 | 0.85319 | 1.1676  | 0.12718  | 0.2334   | 0.93648 | 1.0975  | 0.20779  | 0.74006  | 0.91104 | 1.2014  | 0.35216 | 0.2438  | 0.39371 | 0.97361 | 0.092542 | 0.74284  | 0.92801 |
| 6 | 138308788 | rs183605585 | 4 | 0.103  | 1.7004 | 0.9108 | 2.4459  | 1.5713  | 0.33465 | 0.52529 | 2.2392  | 0.62966  | 0.11231  | 0.77926 | --      | --       | --       | --      | 0.73273 | 1.7101  | 0.60125 | 0.34242 | 1.5544  | 0.40274  | 0.060162 | 0.74838 |
| 6 | 138308817 | rs189045711 | 3 | 0.8566 | 1.1326 | 0.9368 | 1.5336  | 2.4747  | 0.38263 | 0.42332 | --      | --       | --       | 0.72968 | 1.4197  | 0.54205  | 0.38229  | --      | --      | --      | --      | 1.2723  | 0.83066 | 0.17977  | 0.31133  |         |
| 6 | 138308943 | rs7748757   | 5 | 0.3859 | 1.0599 | 0.7611 | 1.2005  | 0.29413 | 0.92243 | 0.85448 | 1.1723  | 0.12648  | 0.22068  | 0.94076 | 1.1024  | 0.20745  | 0.72232  | 0.90923 | 1.2266  | 0.34695 | 0.19372 | 0.39856 | 0.97402 | 0.092495 | 0.75071  | 0.9253  |
| 6 | 138309053 | rs7766834   | 4 | 0.5253 | 1.0564 | 0.7548 | 1.3463  | 0.41233 | 0.7203  | 0.66974 | 1.1881  | 0.1665   | 0.20132  | 0.76244 | 0.99397 | 0.26743  | 0.86883  | 0.76631 | --      | --      | --      | --      | 0.99318 | 0.11239  | 0.75729  | 0.80293 |
| 6 | 138309111 | rs7766965   | 4 | 0.5585 | 1.0501 | 0.7874 | 1.2848  | 0.39125 | 0.82982 | 0.68564 | 1.1713  | 0.16093  | 0.23811  | 0.78249 | 1.0254  | 0.25872  | 0.98341  | 0.77995 | --      | --      | --      | --      | 0.98681 | 0.10949  | 0.7691   | 0.82491 |
| 6 | 138309205 | rs6570198   | 5 | 0.5721 | 1.02   | 0.763  | 0.99941 | 0.1434  | 0.82102 | 0.74198 | 1.0382  | 0.087297 | 0.35217  | 0.5145  | 1.1472  | 0.10192  | 0.10838  | 0.76235 | 1.0549  | 0.18875 | 0.44815 | 0.38588 | 0.99019 | 0.045799 | 0.64108  | 0.74055 |
| 6 | 138309210 | rs193100832 | 3 | 0.5563 | 1.2578 | 0.974  | --      | --      | --      | --      | 1.1047  | 0.80849  | 0.83259  | 0.58575 | --      | --       | --       | --      | 1.039   | 1.7212  | 0.96798 | 0.49286 | 1.33    | 0.46063  | 0.90098  | 0.6503  |
| 6 | 138309422 | rs6932107   | 5 | 0.5518 | 1.0211 | 0.7668 | 0.99798 | 0.14366 | 0.8295  | 0.73807 | 1.0371  | 0.078391 | 0.36166  | 0.51196 | 1.1493  | 0.10197  | 0.10318  | 0.75854 | 1.054   | 0.18914 | 0.45509 | 0.38441 | 0.99217 | 0.045854 | 0.67733  | 0.7375  |
| 6 | 138309568 | rs144247297 | 4 | 0.7906 | 1.0653 | 0.9939 | --      | --      | --      | --      | 0.9983  | 0.39646  | 0.99357  | 0.39277 | 1.1967  | 0.85144  | 0.64001  | 0.37829 | 0.94231 | 0.9129  | 0.8391  | 0.32977 | 1.1155  | 0.33933  | 0.52558  | 0.38739 |
| 6 | 138309598 | rs146856897 | 5 | 0.9416 | 0.993  | 0.9242 | 0.99789 | 0.44326 | 0.68233 | 0.40105 | 0.94309 | 1.8052   | 0.49478  | 0.44673 | 0.90578 | 0.29956  | 0.35485  | 0.39288 | 1.3936  | 0.39855 | 0.02327 | 0.38024 | 1.001   | 0.13343  | 0.85657  | 0.38809 |
| 6 | 138309642 | rs191680197 | 5 | 0.714  | 1.1165 | 0.154  | 0.28034 | 0.93867 | 0.13843 | 0.64342 | 1.3511  | 0.36771  | 0.21845  | 0.6439  | 4.204   | 0.74704  | 0.053385 | 0.70242 | 0.42194 | 0.95292 | 0.06687 | 0.41035 | 1.0581  | 0.24107  | 0.46288  | 0.77327 |
| 6 | 138309994 | rs118021481 | 5 | 0.9439 | 0.9933 | 0.9279 | 0.96019 | 0.43147 | 0.84346 | 0.41299 | 0.93707 | 0.17957  | 0.4448   | 0.44721 | 0.91827 | 0.29499  | 0.42044  | 0.39669 | 1.3807  | 0.39866 | 0.02358 | 0.37374 | 1.0078  | 0.13252  | 0.93549  | 0.38901 |
| 6 | 138310076 | rs149034028 | 5 | 0.5308 | 0.9288 | 0.9562 | 1.0295  | 0.76262 | 0.60236 | 0.3388  | 0.83386 | 0.19928  | 0.14466  | 0.5756  | 1.0384  | 0.41595  | 0.83522  | 0.38288 | 0.73719 | 0.66776 | 0.20019 | 0.31703 | 0.99117 | 0.1641   | 0.772    | 0.40131 |
| 6 | 138310239 | rs6937869   | 5 | 0.5495 | 1.0214 | 0.7845 | 0.99572 | 1.04545 | 0.84247 | 0.72077 | 1.004   | 0.078286 | 0.33058  | 0.51279 | 1.145   | 0.10283  | 0.11119  | 0.7461  | 1.0548  | 0.18913 | 0.44845 | 0.38437 | 0.99237 | 0.046309 | 0.68684  | 0.72381 |
| 6 | 138310265 | rs118139134 | 5 | 0.3668 | 1.0627 | 0.7811 | 1.1783  | 0.29578 | 0.96086 | 0.82613 | 1.177   | 0.12687  | 0.20764  | 0.93543 | 1.1038  | 0.20885  | 0.71337  | 0.89833 | 1.2205  | 0.34697 | 0.20122 | 0.39538 | 0.97823 | 0.093177 | 0.78412  | 0.91428 |
| 6 | 138310366 | rs6917901   | 5 | 0.5494 | 1.0214 | 0.7919 | 1.0016  | 0.14612 | 0.80233 | 0.71206 | 1.0391  | 0.078349 | 0.33942  | 0.51233 | 1.1445  | 0.10298  | 0.11155  | 0.74292 | 1.0506  | 0.18943 | 0.47856 | 0.38424 | 0.99244 | 0.046386 | 0.68044  | 0.91985 |
| 6 | 138310455 | rs138129418 | 3 | 0.9002 | 0.9637 | 0.8652 | --      | --      | --      | --      | 0.80229 | 0.47242  | 0.29287  | 0.41055 | 0.96009 | 0.69499  | 0.97396  | 0.47741 | --      | --      | --      | --      | 1.1397  | 0.44986  | 0.33565  | 0.31659 |
| 6 | 138310835 | rs113650324 | 5 | 0.3519 | 1.0649 | 0.7838 | 1.1771  | 0.29687 | 0.9599  | 0.81892 | 1.1803  | 0.12706  | 0.19926  | 0.93405 | 1.1045  | 0.2094   | 0.70969  | 0.8948  | 1.2209  | 0.34711 | 0.20016 | 0.39492 | 0.98038 | 0.093448 | 0.80234  | 0.94194 |
| 6 | 138311010 | rs185437067 | 3 | 0.7353 | 0.8453 | 0.8075 | 0.31302 | 1.6049  | 0.40225 | 0.56858 | 0.88101 | 1.17     | 0.7446   | 0.33273 | --      | --       | --       | --      | --      | --      | --      | --      | 0.95446 | 0.58457  | 0.97861  | 0.53977 |
| 6 | 138311133 | rs6901203   | 3 | 0.9828 | 1.0126 | 0.922  | 1.8193  | 1.5673  | 0.65346 | 0.43546 | 0.92555 | 0.679    | 0.71281  | 0.55834 | --      | --       | --       | --      | 0.90076 | 1.641   | 0.88468 | 0.32481 | --      | --       | --       | --      |
| 6 | 138311136 | rs191371678 | 3 | 0.6261 | 0.774  | 0.5028 | --      | --      | --      | --      | 1.1164  | 0.61636  | 0.71656  | 0.50574 | 0.35811 | 1.2539   | 0.018934 | 0.39071 | 0.19894 | 1.6929  | 0.19592 | 0.5377  | --      | --       | --       | --      |
| 6 | 138311175 | rs192148945 | 4 | 0.7465 | 1.1021 | 0.9629 | --      | --      | --      | --      | 1.0577  | 0.49425  | 0.79868  | 0.4811  | 0.96118 | 1.0444   | 0.86273  | 0.31231 | 1.8397  | 0.10194 | 0.14585 | 0.44912 | 1.0597  | 0.44355  | 0.5995   | 0.37222 |
| 6 | 138311218 | rs72982725  | 5 | 0.3258 | 1.0693 | 0.7812 | 1.1814  | 0.29865 | 0.93971 | 0.81195 | 1.1894  | 0.12857  | 0.17769  | 0.9244  | 1.1038  | 0.21342  | 0.70605  | 0.87636 | 1.2255  | 0.34727 | 0.19248 | 0.39569 | 0.98405 | 0.094137 | 0.8268   | 0.90363 |
| 6 | 138311648 | rs72982726  | 5 | 0.5354 | 1.0473 | 0.8228 | 1.2576  | 0.31786 | 0.81325 | 0.79367 | 1.1344  | 0.14067  | 0.33795  | 0.85311 | 1.0515  | 0.23101  | 0.9059   | 0.82817 | 1.3178  | 0.41315 | 0.07789 | 0.35834 | 0.96984 | 0.10286  | 0.75765  | 0.824   |
| 6 | 138311663 | rs72982727  | 5 | 0.4346 | 1.0537 | 0.804  | 1.1677  | 0.29153 | 0.95352 | 0.85577 | 1.147   | 0.12632  | 0.2891   | 0.93175 | 1.0762  | 0.2033   | 0.80215  | 0.91061 | 1.3111  | 0.35459 | 0.09069 | 0.41843 | 0.97734 | 0.092574 | 0.81555  | 0.90324 |
| 6 | 138311678 | rs72982728  | 5 | 0.4044 | 1.0574 | 0.7912 | 1.1765  | 0.29095 | 0.98208 | 0.84603 | 1.1546  | 0.12604  | 0.26406  | 0.93498 | 1.0773  | 0.20302  | 0.79623  | 0.909   | 1.3119  | 0.35288 | 0.09081 | 0.41984 | 0.97884 | 0.092662 | 0.83564  | 0.89935 |
| 6 | 138311698 | rs72982729  | 5 | 0.3145 | 1.0712 | 0.783  | 1.1804  | 0.29942 | 0.93922 | 0.80653 | 1.1921  | 0.1287   | 0.17166  | 0.92376 | 1.1047  | 0.21385  | 0.70187  | 0.87387 | 1.2258  | 0.34746 | 0.1917  | 0.39526 | 0.98578 | 0.094352 | 0.84135  | 0.901   |
| 6 | 138312040 | rs6907149   | 5 | 0.5711 | 1.0203 | 0.8689 | 1.0087  | 0.14539 | 0.83431 | 0.7324  | 1.0185  | 0.078842 | 0.64349  | 0.51769 | 1.1337  | 0.10323  | 0.13954  | 0.7639  | 1.0404  | 0.20043 | 0.55385 | 0.34969 | 0.99959 | 0.046383 | 0.87195  | 0.72697 |
| 6 | 138312375 | rs6907854   | 5 | 0.4209 | 1.0553 | 0.8063 | 1.1827  | 0.29154 | 0.99889 | 0.8414  | 1.1474  | 0.12571  | 0.28414  | 0.93133 | 1.0708  | 0.2033   | 0.82166  | 0.90187 | 1.3057  | 0.35308 | 0.09395 | 0.41689 | 0.97942 | 0.092592 | 0.83512  | 0.89266 |
| 6 | 138312415 | rs9389545   | 4 | 0.3158 | 1.062  | 0.731  | 0.95204 | 0.26596 | 0.84673 | 0.44798 | 1.0449  | 0.11456  | 0.42921  | 0.46327 | 1.2855  | 0.1859   | 0.017117 | 0.5169  | --      | --      | --      | --      | 1.0438  | 0.079357 | 0.24638  | 0.80161 |
| 6 | 138312522 | rs118023785 | 5 | 0.7911 | 1.0256 | 0.9702 | 0.91593 | 0.52788 | 0.92133 | 0.44935 | 1.0259  | 0.18312  | 0.7616   | 0.55018 | 0.93623 | 0.27205  | 0.72193  | 0.61427 | 1.4251  | 0.54047 | 0.09087 | 0.42222 | 1.0343  | 0.12965  | 0.67978  | 0.54766 |
| 6 | 138312557 | rs6908075   | 5 | 0.2994 | 1.0733 | 0.8016 | 1.1832  | 0.30074 | 0.93179 | 0.79992 | 1.1879  | 0.12754  | 0.18248  | 0.93328 | 1.1048  | 0.21125  | 0.69344  | 0.88532 | 1.2273  | 0.35531 | 0.18803 | 0.38605 | 0.98975 | 0.094414 | 0.87871  | 0.90153 |
| 6 | 138312586 | rs6912331   | 5 | 0.8974 | 0.9944 | 0.968  | 1.039   | 0.21257 | 0.93946 | 0.47074 | 0.9507  | 0.077091 | 0.32066  | 0.70068 |         |          |          |         |         |         |         |         |         |          |          |         |



|   |           |                  |   |         |        |        |         |         |         |         |         |          |          |         |         |          |         |         |         |         |         |         |         |          |          |         |
|---|-----------|------------------|---|---------|--------|--------|---------|---------|---------|---------|---------|----------|----------|---------|---------|----------|---------|---------|---------|---------|---------|---------|---------|----------|----------|---------|
| 6 | 138319537 | rs72982738       | 5 | 0.08338 | 1.1208 | 0.908  | 1.2648  | 0.29937 | 0.82677 | 0.7551  | 1.1999  | 0.12201  | 0.13534  | 0.94688 | 1.097   | 0.21334  | 0.73203 | 0.8912  | 1.2891  | 0.35177 | 0.10084 | 0.41821 | 1.0613  | 0.09069  | 0.46928  | 0.8968  |
| 6 | 138319733 | chr6:138319733:D | 2 | 0.8532  | 1.0664 | 0.847  | --      | --      | --      | --      | 0.98492 | 0.53904  | 0.98694  | 0.53031 | --      | --       | --      | --      | --      | --      | --      | --      | 1.1285  | 0.45479  | 0.43582  | 0.37724 |
| 6 | 138320223 | rs6923464        | 4 | 0.4576  | 1.0673 | 0.8852 | 1.2192  | 0.32377 | 0.33636 | 0.64032 | 1.1541  | 0.16371  | 0.16511  | 0.62861 | 0.96315 | 0.2813   | 0.88231 | 0.6675  | --      | --      | --      | --      | 1.0245  | 1.01897  | 0.78219  | 0.64795 |
| 6 | 138320263 | rs10457665       | 5 | 0.7751  | 1.021  | 0.902  | 0.83918 | 0.35263 | 0.60823 | 0.54666 | 1.0156  | 0.14706  | 0.88424  | 0.61238 | 1.2104  | 0.20535  | 0.13158 | 0.71541 | 1.0423  | 0.42444 | 0.7377  | 0.31912 | 0.99872 | 0.097366 | 0.81795  | 0.63824 |
| 6 | 138320407 | rs142024182      | 5 | 0.9386  | 0.9918 | 0.8733 | 1.4243  | 0.69499 | 0.17311 | 0.45412 | 1.0603  | 0.18234  | 0.64499  | 0.78753 | 1.0044  | 0.3005   | 0.79129 | 0.56797 | 0.57173 | 0.65281 | 0.02907 | 0.35111 | 0.95182 | 0.15496  | 0.44107  | 0.57391 |
| 6 | 138320472 | rs9321641        | 5 | 0.1694  | 1.0508 | 0.7475 | 0.91122 | 0.1558  | 0.59905 | 0.88148 | 1.0102  | 0.069405 | 0.8872   | 0.91384 | 1.1425  | 0.11758  | 0.23256 | 0.91392 | 0.97873 | 0.25152 | 0.82318 | 0.30311 | 1.0731  | 0.048052 | 0.091158 | 0.93635 |
| 6 | 138320568 | rs9321642        | 4 | 0.4601  | 1.0231 | 0.8028 | 0.9069  | 0.14143 | 0.47752 | 0.84797 | 1.0053  | 0.058899 | 0.92637  | 0.94518 | 1.044   | 0.094881 | 0.79184 | 0.92564 | --      | --      | --      | --      | 1.0385  | 0.041032 | 0.080016 | 0.91326 |
| 6 | 138320711 | rs55710114       | 5 | 0.4868  | 0.9709 | 0.9959 | 0.89637 | 0.22114 | 0.44386 | 0.78073 | 0.98556 | 0.078932 | 0.83933  | 0.93191 | 0.95542 | 0.12453  | 0.52291 | 0.89239 | 0.9874  | 0.27902 | 0.93453 | 0.37485 | 0.97113 | 0.057951 | 0.69369  | 0.86545 |
| 6 | 138321281 | rs9494915        | 4 | 0.3789  | 1.0361 | 0.5245 | 0.82449 | 0.17784 | 0.27849 | 0.87486 | 1.0019  | 0.077994 | 0.97917  | 0.89557 | 1.0827  | 0.12707  | 0.48975 | 0.91439 | --      | --      | --      | --      | 1.0657  | 0.052971 | 0.34022  | 0.89365 |
| 6 | 138321476 | rs192382616      | 3 | 0.7508  | 1.3587 | 0.9676 | --      | --      | --      | --      | 1.6146  | 1.1783   | 0.49049  | 0.59476 | --      | --       | --      | --      | 0.97888 | 1.9109  | 0.99757 | 0.62369 | 0.87888 | 3.5551   | 0.97142  | 0.31725 |
| 6 | 138321493 | rs185469604      | 5 | 0.6423  | 1.0955 | 0.7477 | 1.1957  | 0.85517 | 0.61115 | 0.60243 | 1.6936  | 0.45251  | 0.080413 | 0.65766 | 1.7175  | 0.7498   | 0.36373 | 0.66599 | 0.62205 | 1.1697  | 0.29349 | 0.33478 | 0.9398  | 0.24124  | 0.83283  | 0.72967 |
| 6 | 138321619 | rs9968808        | 2 | 0.8025  | 1.2226 | 0.5447 | --      | --      | --      | --      | 0.89466 | 0.95483  | 0.79548  | 0.46136 | 2.6102  | 1.4879   | 0.37729 | 0.62237 | --      | --      | --      | --      | --      | --       | --       | --      |
| 6 | 138321764 | rs9968969        | 2 | 0.4862  | 2.1319 | 0.2088 | --      | --      | --      | --      | 0.93523 | 0.96177  | 0.88961  | 0.50413 | 0.9473  | 1.5177   | 0.30517 | 0.86696 | --      | --      | --      | --      | --      | --       | --       | --      |
| 6 | 138322513 | rs75202629       | 4 | 0.1666  | 1.1129 | 0.66   | 1.2672  | 0.32078 | 0.30194 | 0.74367 | 1.0288  | 0.14763  | 0.81582  | 0.97989 | 1.4775  | 0.26738  | 1.11453 | 0.79661 | --      | --      | --      | --      | 1.0946  | 0.10126  | 0.034639 | 0.78571 |
| 6 | 138322786 | rs4343932        | 4 | 0.1676  | 1.0603 | 0.5735 | 0.84826 | 0.18747 | 0.35285 | 0.97107 | 1.0235  | 0.081905 | 0.77     | 0.95538 | 1.0665  | 0.13919  | 0.73386 | 0.97117 | --      | --      | --      | --      | 1.0976  | 0.055316 | 0.23637  | 0.97016 |
| 6 | 138322949 | rs184662217      | 4 | 0.6666  | 1.1547 | 0.9633 | 0.52914 | 1.5288  | 0.39513 | 0.45723 | 1.1854  | 0.57407  | 0.68071  | 0.61586 | 1.2624  | 0.64458  | 0.75252 | 0.61821 | --      | --      | --      | --      | 1.1694  | 0.5674   | 0.75569  | 0.5113  |
| 6 | 138323047 | rs4327717        | 4 | 0.6593  | 1.0175 | 0.3934 | 0.96152 | 0.15839 | 0.92151 | 0.91327 | 1.1028  | 0.075675 | 0.15673  | 0.95118 | 0.86454 | 0.12404  | 0.20905 | 0.97892 | --      | --      | --      | --      | 1.0141  | 0.052098 | 0.45489  | 0.9745  |
| 6 | 138323198 | rs56328860       | 4 | 0.4213  | 0.9671 | 0.9673 | 0.8912  | 0.20444 | 0.48503 | 0.77177 | 0.98472 | 0.077475 | 0.82598  | 0.95974 | 0.94275 | 0.1208   | 0.47696 | 0.92558 | --      | --      | --      | --      | 0.96921 | 0.056017 | 0.6812   | 0.90925 |
| 6 | 138323219 | rs3778232        | 3 | 0.3303  | 2.7979 | 1.1825 | --      | --      | --      | --      | 0.92212 | 0.95991  | 0.87216  | 0.52444 | 23.756  | 1.49     | 0.2786  | 0.91233 | --      | --      | --      | --      | 1.5494  | 1.9506   | 0.84479  | 0.37595 |
| 6 | 138323272 | rs55822717       | 4 | 0.4131  | 0.9665 | 0.9662 | 0.89031 | 0.20439 | 0.48105 | 0.77122 | 0.98582 | 0.077508 | 0.83771  | 0.95835 | 0.94362 | 0.12076  | 0.48126 | 0.92515 | --      | --      | --      | --      | 0.96749 | 0.056013 | 0.70465  | 0.90761 |
| 6 | 138323512 | rs35661873       | 5 | 0.1641  | 1.06   | 0.6786 | 0.84166 | 0.18677 | 0.33227 | 0.97403 | 1.0235  | 0.081792 | 0.76806  | 0.95001 | 1.0678  | 0.13909  | 0.73053 | 0.97529 | 0.95628 | 0.29903 | 0.66423 | 0.30604 | 1.1013  | 0.055062 | 0.21401  | 0.97542 |
| 6 | 138323558 | rs67916963       | 5 | 0.1529  | 1.0617 | 0.682  | 0.84419 | 0.18692 | 0.34347 | 0.98071 | 1.0255  | 0.081741 | 0.75041  | 0.95346 | 1.0666  | 0.13907  | 0.73628 | 0.97752 | 0.95666 | 0.29903 | 0.66792 | 0.30643 | 1.1033  | 0.055092 | 0.20276  | 0.97825 |
| 6 | 138323623 | rs56156271       | 5 | 0.3966  | 0.9649 | 0.9887 | 0.86986 | 0.21913 | 0.3495  | 0.71921 | 0.98569 | 0.078467 | 0.84068  | 0.94971 | 0.95384 | 0.12369  | 0.51649 | 0.90865 | 0.98811 | 0.27912 | 0.94012 | 0.37486 | 0.96213 | 0.057649 | 0.83161  | 0.88375 |
| 6 | 138323652 | rs147521799      | 4 | 0.5691  | 1.0579 | 0.9441 | 0.94247 | 0.45164 | 0.77917 | 0.55669 | 0.97686 | 0.18777  | 0.81721  | 0.64952 | 1.0526  | 0.34325  | 0.93063 | 0.60263 | --      | --      | --      | --      | 1.109   | 1.02832  | 1.02486  | 0.6189  |
| 6 | 138323812 | rs72982742       | 5 | 0.1293  | 1.1027 | 0.9657 | 1.2136  | 0.28167 | 0.90474 | 0.71813 | 1.155   | 0.12047  | 0.21908  | 0.90591 | 1.0584  | 0.80699  | 0.85099 | 0.90435 | 1.2462  | 0.35311 | 0.11968 | 0.38033 | 1.0652  | 0.088445 | 0.4019   | 0.90794 |
| 6 | 138324035 | rs80004041       | 5 | 0.3966  | 0.9649 | 0.9885 | 0.86949 | 0.21901 | 0.34861 | 0.72004 | 0.98589 | 0.07841  | 0.84275  | 0.95102 | 0.95392 | 0.12357  | 0.51742 | 0.91001 | 0.98805 | 0.27912 | 0.93969 | 0.37487 | 0.9621  | 0.0576   | 0.83224  | 0.88514 |
| 6 | 138324058 | rs35504911       | 5 | 0.1554  | 1.0614 | 0.6921 | 0.84626 | 0.18722 | 0.35173 | 0.97874 | 1.0275  | 0.081835 | 0.73193  | 0.95336 | 1.0564  | 0.13958  | 0.79067 | 0.97408 | 0.95677 | 0.29923 | 0.67086 | 0.30727 | 1.1035  | 0.055269 | 0.20635  | 0.9752  |
| 6 | 138324329 | rs13207116       | 5 | 0.1518  | 1.0617 | 0.68   | 0.84424 | 0.18662 | 0.34396 | 0.98381 | 1.0253  | 0.081563 | 0.75225  | 0.95697 | 1.0669  | 0.13882  | 0.73527 | 0.98081 | 0.95685 | 0.29907 | 0.66931 | 0.30637 | 1.1034  | 0.054993 | 0.20349  | 0.98159 |
| 6 | 138324421 | rs180689155      | 4 | 0.6977  | 0.8383 | 0.9578 | 2.1538  | 2.2453  | 0.02833 | 0.39008 | 0.93883 | 0.77046  | 0.84918  | 0.41277 | 1.2381  | 2.1082   | 0.77622 | 0.32073 | --      | --      | --      | --      | 0.70716 | 0.60427  | 0.27802  | 0.36682 |
| 6 | 138324421 | rs185115214      | 2 | 0.4738  | 0.7681 | 0.6894 | --      | --      | --      | --      | --      | --       | --       | 1.177   | 1.1297  | 1.27642  | 0.60203 | --      | --      | --      | --      | 0.73    | 0.38976 | 0.39025  | 0.70881  |         |
| 6 | 138324447 | rs76981818       | 4 | 0.8675  | 0.9863 | 0.9004 | 1.1085  | 0.40536 | 0.29398 | 0.4505  | 0.9504  | 0.14674  | 0.68162  | 0.76231 | 0.87842 | 0.21967  | 0.40397 | 0.57552 | --      | --      | --      | --      | 1.0329  | 1.11621  | 0.8761   | 0.47173 |
| 6 | 138324608 | rs12661993       | 4 | 0.8041  | 0.8574 | 0.3379 | --      | --      | --      | --      | 0.48957 | 0.94421  | 0.2455   | 0.62662 | 0.1305  | 1.5328   | 1.12416 | 0.74453 | 2.2234  | 1.9982  | 0.47963 | 0.59797 | 2.3481  | 0.88859  | 0.031015 | 0.50517 |
| 6 | 138325071 | rs4341022        | 4 | 0.68    | 1.0134 | 0.6212 | 0.84908 | 0.14913 | 0.21571 | 0.86242 | 1.0025  | 0.061658 | 0.97166  | 0.97387 | 0.99398 | 0.089936 | 0.75257 | 0.95671 | --      | --      | --      | --      | 1.0371  | 0.042559 | 0.21507  | 0.95068 |
| 6 | 138325509 | rs187110659      | 3 | 0.757   | 1.2189 | 0.9692 | --      | --      | --      | --      | 1.2897  | 1.5249   | 0.59499  | 0.33597 | 0.90215 | 1.3671   | 0.67725 | 0.37122 | --      | --      | --      | --      | 1.3372  | 0.82281  | 0.30931  | 0.4277  |
| 6 | 138325573 | rs4513815        | 5 | 0.1491  | 1.0619 | 0.6754 | 0.84432 | 0.18613 | 0.34477 | 0.98883 | 1.025   | 0.081255 | 0.75621  | 0.96319 | 1.0673  | 0.13842  | 0.73383 | 0.98607 | 0.95704 | 0.29915 | 0.67064 | 0.30623 | 1.1039  | 0.054838 | 0.20195  | 0.98683 |
| 6 | 138325800 | rs4410749        | 4 | 0.1526  | 1.0621 | 0.5583 | 0.84702 | 0.18631 | 0.35309 | 0.98459 | 1.025   | 0.081251 | 0.75834  | 0.97464 | 1.0703  | 0.13838  | 0.71545 | 0.98773 | --      | --      | --      | --      | 1.0996  | 0.054934 | 0.22849  | 0.98571 |
| 6 | 138325944 | rs7745153        | 4 | 0.6014  | 1.0206 | 0.6014 | 0.97035 | 0.15674 | 0.95749 | 0.91899 | 1.1054  | 0.075066 | 0.15013  | 0.96635 | 0.88067 | 0.13204  | 0.26846 | 0.98978 | --      | --      | --      | --      | 1.0141  | 0.054934 | 0.44011  | 0.98909 |
| 6 | 138326214 | rs140993611      | 2 | 0.9448  | 0.9543 | 0.3958 | --      | --      | --      | --      | 1.2462  | 0.7453   | 0.46329  | 0.40039 | --      | --       | --      | 0.27795 | 1.6022  | 0.15118 | 0.42655 | --      | --      | --       | --       | --      |
| 6 | 138326355 | rs4289679        | 4 | 0.975   | 1.0019 | 0.9685 | 1.0153  | 0.30624 | 0.53528 | 0.44055 | 1.0491  | 0.11096  | 0.45813  | 0.61312 | 0.97715 | 0.16681  | 0.98583 | 0.59929 | --      | --      | --      | --      | 0.98296 | 0.079863 | 0.16406  | 0.52137 |
| 6 | 138326557 | rs4479955        | 4 | 0.1203  | 1.067  | 0.4827 | 0.84225 | 0.18514 | 0.34006 | 1       | 1.0245  | 0.081065 | 0.76387  | 0.97797 | 1.0524  | 0.13702  | 0.80621 | 1       | --      | --      | --      | --      | 1.1115  | 0.054344 | 0.15444  | 1       |
| 6 | 138326693 | rs9402935        | 4 | 0.6621  | 1.0171 | 0.413  | 0.96604 | 0.1569  | 0.93939 | 0.92392 | 1.1014  | 0.074889 | 0.16709  | 0.97203 | 0.87035 | 0.12247  | 0.23445 | 1       | --      | --      | --      | --      | 1.0125  | 0.051394 | 0.4218   | 1       |
| 6 | 138327306 | rs35996835       | 5 | 0.1676  | 1.0596 | 0.7573 | 0.86527 | 0.19138 | 0.4125  | 0.96969 | 1.0218  | 0.081124 | 0.7888   | 0.97509 | 1.0624  | 0.13935  | 0.75884 | 0.97368 | 0.95429 | 0.30592 | 0.6553  | 0.30516 | 1.0994  | 0.05534  | 0.22663  | 0.97675 |
| 6 | 138327449 | rs35588781       | 4 | 0.1536  | 1.0619 | 0.6082 | 0.86485 | 0.18969 | 0.41621 | 0.97263 | 1.0192  | 0.080808 | 0.8146   | 0.98724 | 1.0728  | 0.13844  | 0.70164 | 0.98181 | --      | --      | --      | --      | 1.0938  | 0.054956 | 0.23015  | 0.9     |

|   |           |                  |   |         |        |        |         |         |          |         |         |          |          |         |         |          |          |         |          |         |         |         |         |          |          |         |         |
|---|-----------|------------------|---|---------|--------|--------|---------|---------|----------|---------|---------|----------|----------|---------|---------|----------|----------|---------|----------|---------|---------|---------|---------|----------|----------|---------|---------|
| 6 | 138332289 | rs180825219      | 5 | 0.2454  | 0.7163 | 0.8524 | 0.29359 | 1.6009  | 0.37298  | 0.39397 | 0.56783 | 0.58161  | 0.1922   | 0.71423 | 0.58983 | 0.97024  | 0.25133  | 0.6311  | 1.5567   | 0.84763 | 0.35554 | 0.59891 | 0.73467 | 0.39795  | 0.39468  | 0.63704 |         |
| 6 | 138332533 | rs4895504        | 4 | 0.2816  | 1.0585 | 0.7621 | 1.0848  | 0.20899 | 0.4781   | 0.95013 | 1.1367  | 0.096433 | 0.14918  | 1       | 0.94484 | 0.15508  | 0.69033  | 0.92471 | --       | --      | --      | --      | 1.0388  | 0.073157 | 0.84158  | 0.94562 |         |
| 6 | 138332845 | chr6:138332845:1 | 5 | 0.3401  | 0.9608 | 0.9771 | 0.88611 | 0.21592 | 0.40207  | 0.72256 | 0.99615 | 0.078287 | 0.19511  | 0.94186 | 0.92471 | 0.12182  | 0.3592   | 0.92761 | 0.94762  | 0.27045 | 0.62012 | 0.38963 | 0.95644 | 0.075723 | 0.85114  | 0.89228 |         |
| 6 | 138333004 | rs139877218      | 4 | 0.6477  | 1.1551 | 0.9802 | 0.66352 | 1.4755  | 0.43631  | 0.43829 | 1.1393  | 0.5601   | 0.76349  | 0.62417 | 1.1126  | 0.63842  | 0.97446  | 0.62514 | --       | --      | --      | --      | 1.2751  | 0.50334  | 0.57519  | 0.52503 |         |
| 6 | 138333084 | rs28548425       | 4 | 0.1271  | 1.0667 | 0.6475 | 0.86164 | 0.19476 | 0.42127  | 0.92918 | 1.0334  | 0.080622 | 0.69921  | 0.98986 | 1.0889  | 0.13864  | 0.6016   | 0.94664 | --       | --      | --      | --      | 1.0981  | 0.055408 | 0.20946  | 0.9464  |         |
| 6 | 138333277 | rs73572534       | 3 | 0.7306  | 0.7537 | 0.6277 | --      | --      | --       | --      | 0.56681 | 0.97625  | 0.22902  | 0.46436 | --      | --       | --       | --      | 4.1221   | 2.0832  | 0.0026  | 0.30096 | 0.47677 | 2.2239   | 0.63775  | 0.36977 |         |
| 6 | 138333485 | rs112542460      | 3 | 0.9704  | 1.0218 | 0.9416 | 1.9158  | 2.5367  | 0.027792 | 0.33782 | --      | --       | --       | 1.3239  | 1.3819  | 0.4805   | 0.33857  | --      | --       | --      | --      | 0.92278 | 0.66077 | 0.9506   | 0.33365  |         |         |
| 6 | 138333580 | rs55688291       | 4 | 0.7756  | 1.0188 | 0.9519 | 1.0525  | 0.32068 | 0.2655   | 0.45038 | 1.0004  | 0.11968  | 0.96308  | 0.80524 | 0.93204 | 0.19105  | 0.54295  | 0.52213 | --       | --      | --      | --      | 1.0466  | 0.088956 | 0.92898  | 0.48585 |         |
| 6 | 138333770 | rs62434248       | 4 | 0.4316  | 0.9681 | 0.9583 | 0.89633 | 0.20237 | 0.51684  | 0.79188 | 0.99465 | 0.076878 | 0.93198  | 0.97494 | 0.94622 | 0.11934  | 0.49976  | 0.94199 | --       | --      | --      | --      | 0.96487 | 0.055469 | 0.73435  | 0.92417 |         |
| 6 | 138333842 | rs12524275       | 4 | 0.5125  | 0.9614 | 0.8541 | 1.0877  | 0.30493 | 0.58595  | 0.45131 | 0.93078 | 0.091995 | 0.42498  | 1       | 1.1039  | 0.19858  | 0.32511  | 0.5276  | --       | --      | --      | --      | 0.95346 | 0.090448 | 0.19182  | 0.48469 |         |
| 6 | 138333899 | chr6:138333899:D | 2 | 0.4817  | 0.6521 | 0.5872 | --      | --      | --       | --      | --      | --       | --       | --      | 1.6813  | 1.8474   | 0.47889  | 0.35502 | --       | --      | --      | --      | 0.58135 | 0.64343  | 0.080768 | 0.38173 |         |
| 6 | 138333989 | rs76816632       | 5 | 0.5116  | 0.8997 | 0.9752 | 1.1288  | 0.90455 | 0.77248  | 0.38005 | 1.0402  | 0.33086  | 0.82692  | 0.48346 | 0.93367 | 0.49102  | 0.68995  | 0.58517 | 0.72029  | 0.5307  | 0.38905 | 0.67878 | 0.85818 | 0.22091  | 0.89263  | 0.60491 |         |
| 6 | 138334135 | rs187929543      | 2 | 0.7833  | 1.169  | 0.7158 | --      | --      | --       | --      | 1.4645  | 0.83993  | 0.32224  | 0.44223 | --      | --       | --       | --      | 0.96692  | 0.77091 | 0.5207  | --      | 0.96692 | 0.77091  | 0.85739  | 0.41774 |         |
| 6 | 138334261 | rs192615552      | 3 | 0.6569  | 0.6881 | 0.9201 | --      | --      | --       | --      | 0.60141 | 1.4673   | 0.60157  | 0.62977 | --      | --       | --       | --      | --       | 0.45078 | 1.615   | 0.46616 | 0.61312 | 1.0245   | 1.3308   | 0.67176 | 0.47305 |
| 6 | 138334860 | rs62434249       | 4 | 0.4149  | 0.967  | 0.9708 | 0.91552 | 0.20212 | 0.61945  | 0.78368 | 0.98926 | 0.07691  | 0.87371  | 0.96393 | 0.9461  | 0.1192   | 0.49626  | 0.93756 | --       | --      | --      | --      | 0.96403 | 0.055491 | 0.7419   | 0.91646 |         |
| 6 | 138335037 | rs9376314        | 4 | 0.4347  | 0.9779 | 0.8145 | 1.0434  | 0.12277 | 0.4322   | 1.1     | 1.0115  | 0.056204 | 0.74591  | 0.9662  | 0.94627 | 0.085353 | 0.67162  | 1       | --       | --      | --      | --      | 0.96338 | 0.037767 | 0.052386 | 1       |         |
| 6 | 138335260 | rs12207754       | 4 | 0.5728  | 1.0182 | 0.7353 | 0.8816  | 0.15334 | 0.34308  | 0.86028 | 1.0074  | 0.061271 | 0.9244   | 1       | 0.98786 | 0.097499 | 0.69214  | 1       | --       | --      | --      | --      | 1.0406  | 0.042263 | 0.26596  | 0.97078 |         |
| 6 | 138335296 | rs9373206        | 4 | 0.6006  | 0.9849 | 0.8152 | 1.0832  | 0.14638 | 0.24709  | 1.1     | 1.0055  | 0.056563 | 0.82391  | 0.96047 | 0.98668 | 0.086738 | 0.95879  | 1       | --       | --      | --      | --      | 0.96708 | 0.038392 | 0.19373  | 1       |         |
| 6 | 138335570 | rs55633971       | 5 | 0.4583  | 0.9693 | 0.9773 | 0.88454 | 0.21857 | 0.41627  | 0.7453  | 1.0041  | 0.078359 | 0.96187  | 0.95443 | 0.94656 | 0.12207  | 0.48349  | 0.9343  | 1.0084   | 0.2829  | 0.90574 | 0.37258 | 0.96073 | 0.057337 | 0.80941  | 0.90423 |         |
| 6 | 138335743 | rs77196747       | 5 | 0.9019  | 1.0099 | 0.9702 | 0.93173 | 0.37465 | 0.95204  | 0.44669 | 0.97091 | 0.15836  | 0.84391  | 0.75311 | 0.93905 | 0.22784  | 0.61784  | 0.50919 | 1.2863   | 0.48379 | 0.07841 | 0.31038 | 1.0399  | 1.0794   | 0.73436  | 0.49911 |         |
| 6 | 138335975 | rs7770676        | 4 | 0.1847  | 1.0579 | 0.8948 | 0.93078 | 0.19678 | 0.69987  | 0.85753 | 1.0364  | 0.080851 | 0.65407  | 0.94461 | 1.0637  | 0.13793  | 0.69801  | 0.88279 | --       | --      | --      | --      | 1.0783  | 0.05561  | 0.34407  | 0.8823  |         |
| 6 | 138336137 | rs4612182        | 4 | 0.3601  | 0.9717 | 0.8679 | 0.99435 | 0.14304 | 0.78408  | 0.79142 | 1.0062  | 0.05651  | 0.82772  | 1       | 0.97949 | 0.094275 | 0.92553  | 0.83173 | --       | --      | --      | --      | 0.94882 | 0.04292  | 0.018406 | 0.80309 |         |
| 6 | 138336242 | rs4594970        | 5 | 0.7515  | 0.9875 | 0.7957 | 1.0105  | 0.16415 | 0.8681   | 0.71381 | 1.0634  | 0.077162 | 0.26294  | 0.74894 | 0.89917 | 0.12516  | 0.24076  | 0.73192 | 0.92954  | 0.26467 | 0.35247 | 0.32029 | 0.96945 | 0.053477 | 0.11167  | 0.74661 |         |
| 6 | 138336803 | rs190889334      | 2 | 0.8678  | 1.0896 | 0.6304 | --      | --      | --       | --      | --      | --       | --       | --      | 1.5931  | 0.94308  | 0.48725  | 0.58325 | --       | --      | --      | --      | 0.92657 | 0.6161   | 0.05533  | 0.34631 |         |
| 6 | 138336804 | rs183474357      | 2 | 0.02049 | 0.2704 | 0.3943 | --      | --      | --       | --      | --      | --       | --       | --      | --      | --       | --       | --      | 0.098721 | 1.3104  | 0.14333 | 0.77861 | 0.3401  | 0.62547  | 0.021626 | 0.44305 |         |
| 6 | 138336833 | rs187326365      | 3 | 0.7263  | 1.2478 | 0.9679 | --      | --      | --       | --      | 1.4308  | 1.4625   | 0.43906  | 0.32884 | 0.92015 | 1.3645   | 0.70545  | 0.37048 | --       | --      | --      | --      | 1.3337  | 0.81754  | 0.33674  | 0.41799 |         |
| 6 | 138337147 | rs73572540       | 2 | 0.2967  | 3.242  | 0.8123 | 4.9905  | 2.1376  | 0.21673  | 0.516   | --      | --       | --       | --      | --      | --       | --       | --      | 2.7458   | 1.3266  | 0.05756 | 0.41199 | --      | --       | --       | --      |         |
| 6 | 138337274 | rs9373207        | 4 | 0.7493  | 0.9899 | 0.7383 | 1.1181  | 0.14098 | 0.22868  | 0.71981 | 1.0183  | 0.060843 | 0.68117  | 0.79686 | 0.97975 | 0.095433 | 0.94985  | 0.80876 | --       | --      | --      | --      | 0.96767 | 0.042367 | 0.062743 | 0.78463 |         |
| 6 | 138337546 | rs67277719       | 4 | 0.7537  | 0.9831 | 0.9743 | 1.0408  | 0.30323 | 0.40983  | 0.41625 | 1.0179  | 0.11985  | 0.73379  | 0.52069 | 0.99106 | 0.16826  | 0.88283  | 0.57294 | --       | --      | --      | --      | 0.95829 | 0.081009 | 0.046282 | 0.49353 |         |
| 6 | 138337772 | rs62432767       | 4 | 0.8741  | 1.0157 | 0.9889 | 1.053   | 0.51586 | 0.78544  | 0.35224 | 1.0663  | 0.17666  | 0.53199  | 0.54365 | 0.98834 | 0.28767  | 0.74303  | 0.53465 | --       | --      | --      | --      | 0.99125 | 0.13347  | 0.37458  | 0.47772 |         |
| 6 | 138337903 | rs12203234       | 4 | 0.4789  | 1.032  | 0.6717 | 1.1306  | 0.23413 | 0.19962  | 0.4035  | 1.0808  | 0.067582 | 0.27754  | 1       | 0.91326 | 0.13678  | 0.22878  | 0.54766 | --       | --      | --      | --      | 1.0071  | 0.068215 | 0.35913  | 0.4744  |         |
| 6 | 138338207 | rs6570205        | 4 | 0.8407  | 1.006  | 0.403  | 0.96298 | 0.12727 | 0.77613  | 1       | 1.0701  | 0.055785 | 0.23635  | 1       | 0.89731 | 0.091422 | 0.14034  | 1       | --       | --      | --      | --      | 1.0005  | 0.039479 | 0.99191  | 1       |         |
| 6 | 138338340 | rs6905679        | 4 | 0.7606  | 1.0141 | 0.9781 | 1.0218  | 0.20508 | 0.73192  | 0.58095 | 1.0448  | 0.084602 | 0.5044   | 0.67531 | 1.0129  | 0.13813  | 0.90715  | 0.67533 | --       | --      | --      | --      | 0.9973  | 0.06254  | 0.70529  | 0.6418  |         |
| 6 | 138338358 | rs117089547      | 4 | 0.3817  | 1.3351 | 0.9848 | 1.8496  | 2.1384  | 0.42238  | 0.35995 | 1.4384  | 0.62612  | 0.43238  | 0.74107 | --      | --       | --       | --      | 0.73549  | 1.7624  | 0.62339 | 0.34935 | 1.3199  | 0.40591  | 0.30329  | 0.74738 |         |
| 6 | 138338535 | rs19237907       | 4 | 0.4336  | 0.6854 | 0.3195 | 1.5822  | 1.9292  | 0.23805  | 0.57893 | 1.287   | 0.65723  | 0.60629  | 0.80587 | 2.6336  | 1.9073   | 0.47465  | 0.5592  | --       | --      | --      | --      | 0.30707 | 0.57875  | 0.029558 | 0.73114 |         |
| 6 | 138338683 | rs185591480      | 3 | 0.5934  | 0.7162 | 0.4838 | 1.3673  | 1.5222  | 0.48813  | 0.54583 | 1.3901  | 0.99056  | 0.54248  | 0.57192 | --      | --       | --       | --      | --       | --      | --      | --      | 0.30239 | 0.95017  | 0.10114  | 0.49552 |         |
| 6 | 138339002 | rs75040725       | 2 | 0.9762  | 0.977  | 0.5186 | 0.55242 | 1.1778  | 0.1515   | 0.30949 | 1.5221  | 1.0385   | 0.15867  | 0.31752 | --      | --       | --       | --      | --       | --      | --      | --      | --      | --       | --       | --      |         |
| 6 | 138339028 | rs11756389       | 4 | 0.2427  | 1.0529 | 0.637  | 0.99639 | 0.21945 | 0.49953  | 0.76643 | 1.1438  | 0.077926 | 0.079438 | 1       | 1.0348  | 0.12872  | 0.74969  | 0.81774 | --       | --      | --      | --      | 1.0089  | 0.061034 | 0.89916  | 0.79791 |         |
| 6 | 138339096 | rs34959665       | 4 | 0.5619  | 1.0359 | 0.4447 | 0.96447 | 0.26936 | 0.45666  | 0.75179 | 0.99418 | 0.1126   | 0.87657  | 0.87141 | 1.4365  | 0.21074  | 0.080212 | 0.78795 | --       | --      | --      | --      | 1.0152  | 0.080227 | 0.48012  | 0.80863 |         |
| 6 | 138339147 | rs55800211       | 4 | 0.06483 | 0.9313 | 0.4017 | 0.95496 | 0.17275 | 0.57356  | 0.86231 | 0.909   | 0.071656 | 0.15618  | 0.9039  | 0.79152 | 0.11343  | 0.034074 | 0.90136 | --       | --      | --      | --      | 0.97415 | 0.052134 | 0.92928  | 0.86954 |         |
| 6 | 138339330 | rs7767415        | 4 | 0.1958  | 1.1067 | 0.852  | 1.2346  | 0.32017 | 0.22708  | 0.72052 | 1.0453  | 0.15021  | 0.71071  | 0.74305 | 0.96847 | 0.22733  | 0.92548  | 0.87976 | --       | --      | --      | --      | 1.1581  | 0.10586  | 0.62664  | 0.73012 |         |
| 6 | 138339483 | rs115460131      | 2 | 0.9949  | 1.0065 | 0.2845 | --      | --      | --       | --      | --      | --       | --       | --      | --      | --       | --       | --      | 6.7083   | 2.061   | 0.17801 | 0.61782 | 0.58548 | 0.97124  | 0.16868  | 0.36424 |         |
| 6 | 138339722 | rs76252304       | 2 | 0.8758  | 0.8725 | 0.3597 | --      | --      | --       | --      | --      | --       | --       | --      | --      | --       | --       | --      | 4.7536   | 2.046   | 0.18297 | 0.54425 | 0.5988  | 0.96415  | 0.16703  | 0.3629  |         |
| 6 | 138339834 | rs4896310        | 4 | 0.7513  | 0.9884 | 0.9318 | 0.96558 | 0.16445 | 0.45665  | 0.91071 | 1.0106  | 0.070205 | 0.89003  | 0.94387 | 1.0372  | 0.11179  | 0.82767  | 0.939   | --       | --      | --      | --      | 0.97088 | 0.048859 | 0.47751  | 0.91789 |         |
| 6 | 138340342 | rs75695700       | 2 | 0.4682  | 1.2233 | 0.7246 | --      | --      | --       | --      | 1.055   | 0.50376  | 0.82393  | 0.45631 | --      | --       | --       | --      | --       | --      | --      | --      | 1.3051  | 0.33312  | 0.093866 | 0.43868 |         |

|   |           |             |   |        |        |        |         |         |         |         |         |          |          |         |         |          |          |         |        |         |         |         |    |         |          |          |          |         |        |
|---|-----------|-------------|---|--------|--------|--------|---------|---------|---------|---------|---------|----------|----------|---------|---------|----------|----------|---------|--------|---------|---------|---------|----|---------|----------|----------|----------|---------|--------|
| 6 | 138346044 | rs183506931 | 2 | 0.7015 | 1.2419 | 0.8631 | --      | --      | --      | --      | --      | --       | 1.0521   | 1.1157  | 0.93935 | 0.38351  | --       | --      | --     | --      | --      | --      | -- | --      | 1.3151   | 0.65548  | 0.45837  | 0.35983 |        |
| 6 | 138346076 | rs13203004  | 4 | 0.19   | 0.9326 | 0.6955 | 0.78709 | 0.25742 | 0.40118 | 0.90352 | 1.014   | 0.11144  | 0.82582  | 0.92605 | 1.0008  | 0.15433  | 0.88554  | 0.99565 | --     | --      | --      | --      | -- | --      | 0.90225  | 0.068123 | 0.06913  | 0.98994 |        |
| 6 | 138346326 | rs34574362  | 4 | 0.1705 | 0.93   | 0.7567 | 0.79133 | 0.254   | 0.40572 | 0.90253 | 0.99236 | 0.10905  | 0.99878  | 0.9352  | 1.0046  | 0.15475  | 0.907    | 0.99341 | --     | --      | --      | --      | -- | --      | 0.90367  | 0.068164 | 0.072266 | 0.98893 |        |
| 6 | 138346344 | rs117328294 | 3 | 0.836  | 1.0597 | 0.8919 | 1.6129  | 1.4045  | 0.27049 | 0.36938 | 0.89718 | 0.49554  | 0.72221  | 0.6258  | --      | --       | --       | --      | --     | --      | --      | --      | -- | --      | 1.1218   | 0.34992  | 0.58742  | 0.60633 |        |
| 6 | 138346440 | rs34705709  | 4 | 0.171  | 0.93   | 0.7536 | 0.79015 | 0.25343 | 0.40427 | 0.90242 | 0.99163 | 0.10907  | 0.99278  | 0.93735 | 1.0067  | 0.15488  | 0.91877  | 0.99301 | --     | --      | --      | --      | -- | --      | 0.90375  | 0.068223 | 0.072354 | 0.98833 |        |
| 6 | 138346585 | rs9373208   | 4 | 0.2005 | 1.1004 | 0.7899 | 1.312   | 0.30397 | 0.14727 | 0.80057 | 1.0316  | 0.1478   | 0.81345  | 0.80582 | 0.96375 | 0.21684  | 0.90852  | 0.9617  | --     | --      | --      | --      | -- | --      | 1.1432   | 0.09936  | 0.97234  | 0.82897 |        |
| 6 | 138346667 | rs4398760   | 4 | 0.2226 | 1.0491 | 0.2268 | 1.0208  | 0.12768 | 0.87042 | 1       | 1.0627  | 0.055877 | 0.29466  | 0.99381 | 1.207   | 0.087972 | 0.058662 | 1       | --     | --      | --      | --      | -- | --      | 0.99451  | 0.038872 | 0.48936  | 1       |        |
| 6 | 138346689 | rs35641047  | 4 | 0.1488 | 0.9226 | 0.7504 | 0.80092 | 0.27414 | 0.4429  | 0.84972 | 0.97465 | 0.11606  | 0.85711  | 0.89024 | 1.0359  | 0.16312  | 0.92965  | 0.95818 | --     | --      | --      | --      | -- | --      | 0.89244  | 0.071343 | 0.048063 | 0.95093 |        |
| 6 | 138346693 | rs34310416  | 4 | 0.1705 | 0.93   | 0.7469 | 0.78552 | 0.25322 | 0.3901  | 0.90347 | 0.99141 | 0.10905  | 0.99107  | 0.93668 | 1.0071  | 0.15482  | 0.92089  | 0.99416 | --     | --      | --      | --      | -- | --      | 0.90403  | 0.068231 | 0.073654 | 0.98888 |        |
| 6 | 138346715 | rs35304517  | 4 | 0.1721 | 0.9302 | 0.7515 | 0.7886  | 0.25347 | 0.39818 | 0.90132 | 0.99164 | 0.10902  | 0.99278  | 0.9369  | 1.0071  | 0.15481  | 0.92055  | 0.99429 | --     | --      | --      | --      | -- | --      | 0.90407  | 0.068225 | 0.073177 | 0.9884  |        |
| 6 | 138346961 | rs9494919   | 4 | 0.8535 | 1.0141 | 0.8584 | 0.78481 | 0.31554 | 0.41672 | 0.8561  | 1.0487  | 0.146    | 0.71507  | 0.89842 | 0.97859 | 0.23667  | 0.94457  | 0.99391 | --     | --      | --      | --      | -- | --      | 1.031    | 0.10049  | 0.38951  | 0.95533 |        |
| 6 | 138347001 | rs6570206   | 4 | 0.2204 | 1.0495 | 0.2263 | 1.0241  | 0.12798 | 0.90096 | 0.99539 | 1.0625  | 0.055861 | 0.29599  | 0.99468 | 1.2079  | 0.088191 | 0.057128 | 0.99451 | --     | --      | --      | --      | -- | --      | 0.99447  | 0.038923 | 0.49748  | 0.99397 |        |
| 6 | 138347124 | rs72982769  | 4 | 0.1933 | 0.9332 | 0.6993 | 0.78753 | 0.2574  | 0.40255 | 0.90349 | 1.0139  | 0.11147  | 0.82632  | 0.92572 | 1.001   | 0.15432  | 0.88699  | 0.99634 | --     | --      | --      | --      | -- | --      | 0.90313  | 0.068045 | 0.071565 | 0.9921  |        |
| 6 | 138347125 | rs67035700  | 4 | 0.1934 | 0.9332 | 0.6993 | 0.78753 | 0.2574  | 0.40255 | 0.90349 | 1.0139  | 0.11147  | 0.82632  | 0.92572 | 1.001   | 0.15432  | 0.88699  | 0.99634 | --     | --      | --      | --      | -- | --      | 0.90314  | 0.068044 | 0.071566 | 0.9921  |        |
| 6 | 138347183 | rs76999793  | 2 | 0.9617 | 0.9635 | 0.5237 | 0.56331 | 1.1434  | 0.15891 | 0.33379 | 1.5161  | 1.0507   | 0.2243   | 0.3625  | --      | --       | --       | --      | --     | --      | --      | --      | -- | --      | --       | --       | --       | --      | --     |
| 6 | 138347275 | rs142791650 | 2 | 0.5221 | 3.2576 | 0.1383 | 30.988  | 2.1493  | 0.24098 | 0.83333 | 0.71862 | 1.3526   | 0.44999  | 0.32817 | --      | --       | --       | --      | --     | --      | --      | --      | -- | --      | --       | --       | --       | --      | --     |
| 6 | 138347324 | rs35979213  | 4 | 0.1717 | 0.9303 | 0.7674 | 0.80373 | 0.25278 | 0.41397 | 0.9009  | 0.99354 | 0.10903  | 0.991    | 0.93775 | 1.0048  | 0.15478  | 0.90846  | 0.99517 | --     | --      | --      | --      | -- | --      | 0.90286  | 0.068024 | 0.071296 | 0.99294 |        |
| 6 | 138347397 | rs4895505   | 4 | 0.1731 | 0.9304 | 0.7653 | 0.8042  | 0.25295 | 0.41495 | 0.90129 | 0.99374 | 0.10905  | 0.98936  | 0.93856 | 1.0061  | 0.1548   | 0.91578  | 0.99478 | --     | --      | --      | --      | -- | --      | 0.90273  | 0.068108 | 0.070961 | 0.99161 |        |
| 6 | 138347501 | rs4895506   | 4 | 0.1667 | 0.9297 | 0.765  | 0.80418 | 0.25279 | 0.41492 | 0.89985 | 0.99483 | 0.10909  | 0.98092  | 0.93479 | 1.0022  | 0.15406  | 0.89139  | 1       | --     | --      | --      | --      | -- | --      | 0.90211  | 0.067688 | 0.068779 | 1       |        |
| 6 | 138347595 | rs4895507   | 4 | 0.1732 | 0.9305 | 0.7597 | 0.80117 | 0.25253 | 0.40778 | 0.90394 | 0.99417 | 0.10908  | 0.9864   | 0.93764 | 1.0064  | 0.15481  | 0.91758  | 0.9949  | --     | --      | --      | --      | -- | --      | 0.90285  | 0.0681   | 0.071173 | 0.99147 |        |
| 6 | 138347627 | rs35352727  | 4 | 0.1762 | 0.9309 | 0.7588 | 0.80031 | 0.25311 | 0.4023  | 0.90198 | 0.99499 | 0.10907  | 0.97941  | 0.93783 | 1.0062  | 0.15478  | 0.9156   | 0.99465 | --     | --      | --      | --      | -- | --      | 0.9034   | 0.068074 | 0.072169 | 0.99177 |        |
| 6 | 138347820 | rs13196742  | 4 | 0.1907 | 0.9329 | 0.6887 | 0.78609 | 0.25725 | 0.39891 | 0.90287 | 1.0155  | 0.1114   | 0.81395  | 0.92649 | 1.001   | 0.15429  | 0.88722  | 0.99693 | --     | --      | --      | --      | -- | --      | 0.90233  | 0.067917 | 0.070052 | 0.99516 |        |
| 6 | 138347830 | rs34416937  | 4 | 0.1716 | 0.9302 | 0.7377 | 0.7845  | 0.25316 | 0.3865  | 0.90314 | 0.99423 | 0.10906  | 0.98566  | 0.93736 | 1.0065  | 0.15485  | 0.91753  | 0.99422 | --     | --      | --      | --      | -- | --      | 0.90377  | 0.068073 | 0.073579 | 0.9919  |        |
| 6 | 138347920 | rs61021905  | 4 | 0.1696 | 0.9299 | 0.742  | 0.78693 | 0.25307 | 0.39429 | 0.90343 | 0.99331 | 0.10907  | 0.99299  | 0.93748 | 1.0069  | 0.15488  | 0.9194   | 0.99372 | --     | --      | --      | --      | -- | --      | 0.90335  | 0.068061 | 0.07242  | 0.99228 |        |
| 6 | 138347921 | rs114634262 | 2 | 0.9347 | 0.9574 | 0.4487 | --      | --      | --      | --      | 0.66246 | 0.72009  | 0.37968  | 0.64194 | --      | --       | --       | --      | --     | --      | --      | --      | -- | --      | --       | 1.4865   | 0.78703  | 0.17658 | 0.4921 |
| 6 | 138348036 | rs146144285 | 4 | 0.7457 | 0.9588 | 0.7017 | 0.45922 | 0.72594 | 0.13407 | 0.45163 | 1.1375  | 0.30409  | 0.3923   | 0.52627 | 1.0299  | 0.34498  | 0.8873   | 0.60697 | --     | --      | --      | --      | -- | --      | 0.93268  | 0.16184  | 0.19604  | 0.56167 |        |
| 6 | 138348148 | rs34031570  | 4 | 0.1727 | 0.9304 | 0.742  | 0.78871 | 0.25323 | 0.3987  | 0.90093 | 0.99458 | 0.10908  | 0.98314  | 0.93658 | 1.0077  | 0.15487  | 0.92002  | 0.99325 | --     | --      | --      | --      | -- | --      | 0.90352  | 0.068061 | 0.072798 | 0.99202 |        |
| 6 | 138348152 | rs34330196  | 4 | 0.1925 | 0.9331 | 0.6892 | 0.78613 | 0.25726 | 0.39905 | 0.90291 | 1.0155  | 0.1114   | 0.81392  | 0.92643 | 1.0015  | 0.15434  | 0.89003  | 0.9963  | --     | --      | --      | --      | -- | --      | 0.90262  | 0.067934 | 0.070842 | 0.99475 |        |
| 6 | 138348497 | rs9494921   | 4 | 0.8338 | 1.016  | 0.863  | 0.78232 | 0.31448 | 0.39826 | 0.84996 | 1.045   | 0.14547  | 0.7327   | 0.88974 | 1.023   | 0.23386  | 0.89256  | 0.95214 | --     | --      | --      | --      | -- | --      | 1.0282   | 0.10033  | 0.39612  | 0.95281 |        |
| 6 | 138348746 | rs72982781  | 4 | 0.2109 | 0.9088 | 0.7406 | 1.2942  | 0.31042 | 0.1376  | 0.78287 | 1.0184  | 0.14555  | 0.88719  | 0.80477 | 0.95111 | 0.21604  | 0.86306  | 0.95857 | --     | --      | --      | --      | -- | --      | 1.1565   | 0.10136  | 0.171275 | 0.8097  |        |
| 6 | 138348776 | rs9399231   | 4 | 0.2132 | 1.0987 | 0.7994 | 1.2954  | 0.30345 | 0.15976 | 0.82029 | 1.0265  | 0.14979  | 0.84897  | 0.82209 | 0.96602 | 0.21777  | 0.91147  | 0.97423 | --     | --      | --      | --      | -- | --      | 1.1436   | 0.10073  | 0.94201  | 0.84487 |        |
| 6 | 138348968 | rs9373209   | 4 | 0.2127 | 1.0986 | 0.7706 | 1.2939  | 0.30311 | 0.15902 | 0.81758 | 1.024   | 0.14897  | 0.86024  | 0.81108 | 0.95385 | 0.21798  | 0.86811  | 0.96524 | --     | --      | --      | --      | -- | --      | 1.1482   | 0.10067  | 0.88297  | 0.83609 |        |
| 6 | 138349142 | rs190065990 | 2 | 0.4041 | 0.4254 | 0.4153 | --      | --      | --      | --      | 0.21982 | 1.3063   | 0.060687 | 0.51547 | 1.2213  | 1.6508   | 0.7135   | 0.47509 | --     | --      | --      | --      | -- | --      | --       | --       | --       | --      | --     |
| 6 | 138349172 | rs4896311   | 4 | 0.2304 | 1.0481 | 0.665  | 1.0033  | 0.18236 | 0.48075 | 0.92704 | 1.1279  | 0.074786 | 0.099689 | 1       | 1.0725  | 0.11202  | 0.52886  | 0.9691  | --     | --      | --      | --      | -- | --      | 1.0095   | 0.052398 | 0.82083  | 0.95994 |        |
| 6 | 138349239 | rs112481818 | 2 | 0.9937 | 0.9964 | 0.7515 | --      | --      | --      | --      | 0.76631 | 0.94752  | 0.37044  | 0.32025 | --      | --       | --       | --      | --     | --      | --      | --      | -- | --      | 1.0799   | 0.52466  | 0.86566  | 0.42499 |        |
| 6 | 138349466 | rs141929330 | 2 | 0.1648 | 0.4376 | 0.9167 | --      | --      | --      | --      | 0.5099  | 1.5778   | 0.36417  | 0.44793 | 0.42667 | 0.64236  | 0.14382  | 0.85589 | --     | --      | --      | --      | -- | --      | --       | --       | --       | --      | --     |
| 6 | 138349707 | rs186090258 | 5 | 0.4047 | 0.8629 | 0.6534 | 0.58895 | 1.0649  | 0.36837 | 0.53993 | 1.3536  | 0.38226  | 0.18617  | 0.5942  | 0.72215 | 0.70132  | 0.66357  | 0.91713 | 1.1683 | 0.85922 | 0.36422 | 0.73049 | -- | 0.21541 | 0.075912 | 0.72187  | --       | --      |        |
| 6 | 138349860 | rs146208654 | 4 | 0.8388 | 1.0428 | 0.935  | 1.4821  | 1.0153  | 0.40718 | 0.3976  | 1.1817  | 0.33311  | 0.37414  | 0.58683 | 0.87709 | 0.8944   | 0.50625  | 0.37436 | --     | --      | --      | --      | -- | --      | 0.94234  | 0.2844   | 0.99149  | 0.48703 |        |
| 6 | 138349887 | rs6922739   | 4 | 0.2279 | 1.047  | 0.2493 | 1.0183  | 0.12902 | 0.9027  | 0.9816  | 1.0619  | 0.05577  | 0.30179  | 0.99899 | 1.2031  | 0.088684 | 0.064924 | 0.98987 | --     | --      | --      | --      | -- | --      | 0.99524  | 0.039011 | 0.5311   | 0.98805 |        |
| 6 | 138350041 | rs6923247   | 4 | 0.2171 | 1.0489 | 0.2395 | 1.017   | 0.12837 | 0.8794  | 0.98803 | 1.0664  | 0.055835 | 0.26753  | 1       | 1.2036  | 0.088637 | 0.065357 | 0.99063 | --     | --      | --      | --      | -- | --      | 0.99521  | 0.038998 | 0.54628  | 0.98783 |        |
| 6 | 138350160 | rs2506844   | 4 | 0.6085 | 0.9821 | 0.9304 | 0.9798  | 0.15694 | 0.5044  | 1       | 0.99561 | 0.067485 | 0.9403   | 0.99567 | 1.0394  | 0.1079   | 0.82282  | 1       | --     | --      | --      | --      | -- | --      | 0.9658   | 0.046505 | 0.54197  | 1       |        |
| 6 | 138350382 | rs143574300 | 4 | 0.6585 | 0.9887 | 0.9249 | 1.0095  | 1.0552  | 0.8582  | 0.34044 | 1.2907  | 0.33123  | 0.27965  | 0.73413 | 1.1283  | 0.51182  | 0.591    | 0.58619 | --     | --      | --      | --      | -- | --      | 0.96317  | 0.27501  | 0.47275  | 0.4887  |        |
| 6 | 138350523 | rs13206190  | 4 | 0.6907 | 1.0263 | 0.3302 | 0.98335 | 0.25914 | 0.5695  | 0.7141  | 0.93915 | 0.10807  | 0.44677  | 0.85399 | 1.413   | 0.19392  | 0.058348 | 0.79303 | --     | --      | --      | --      | -- | --      | 1.0174   | 0.074856 | 0.35646  | 0.81331 |        |
| 6 | 138       |             |   |        |        |        |         |         |         |         |         |          |          |         |         |          |          |         |        |         |         |         |    |         |          |          |          |         |        |

|   |           |                  |   |         |        |        |         |         |          |         |         |          |          |         |          |          |          |         |         |         |         |         |          |          |          |         |         |
|---|-----------|------------------|---|---------|--------|--------|---------|---------|----------|---------|---------|----------|----------|---------|----------|----------|----------|---------|---------|---------|---------|---------|----------|----------|----------|---------|---------|
| 6 | 138356810 | rs78593195       | 3 | 0.5494  | 0.7771 | 0.5065 | --      | --      | --       | --      | --      | --       | 0.30097  | 0.92375 | 0.001116 | 0.48263  | 0.79704  | 1.391   | 0.69307 | 0.38432 | 1.0266  | 0.5035  | 0.67395  | 0.40489  |          |         |         |
| 6 | 138357017 | rs1076662        | 4 | 0.04842 | 1.0587 | 0.7139 | 1.1021  | 0.12948 | 0.62034  | 0.95483 | 1.0596  | 0.056139 | 0.31136  | 0.94739 | 1.1528   | 0.086151 | 0.14669  | 0.98119 | --      | --      | --      | 1.0371  | 0.038224 | 0.53696  | 0.97422  |         |         |
| 6 | 138357018 | rs9402939        | 4 | 0.3927  | 1.064  | 0.3743 | 1.2977  | 0.28391 | 0.1191   | 0.80754 | 0.97598 | 0.13631  | 0.82826  | 0.80095 | 0.81087  | 0.21522  | 0.34418  | 0.92078 | --      | --      | --      | 1.1452  | 0.092525 | 0.71431  | 0.84155  |         |         |
| 6 | 138357162 | chr6:138357162:D | 4 | 0.05637 | 1.0584 | 0.7059 | 1.0969  | 0.13296 | 0.65231  | 0.89608 | 1.0434  | 0.057243 | 0.46254  | 0.89744 | 1.1632   | 0.089119 | 0.097226 | 0.91658 | --      | --      | --      | 1.0428  | 0.039473 | 0.50085  | 0.91026  |         |         |
| 6 | 138357170 | rs2473099        | 4 | 0.4795  | 1.1421 | 0.9726 | 1.689   | 0.90125 | 0.028559 | 0.30684 | 1.1031  | 0.32841  | 0.54776  | 0.48042 | 1.2377   | 0.57789  | 0.37622  | 0.41322 | --      | --      | --      | 1.1117  | 0.25972  | 0.41066  | 0.41937  |         |         |
| 6 | 138357290 | rs117949324      | 4 | 0.9795  | 1.0015 | 0.393  | 1.1204  | 0.24209 | 0.80654  | 0.63678 | 0.87493 | 0.11027  | 0.083031 | 0.68435 | 1.2256   | 0.18352  | 0.15062  | 0.73038 | --      | --      | --      | 1.0218  | 0.079117 | 0.88561  | 0.70086  |         |         |
| 6 | 138357324 | rs117617831      | 5 | 0.8471  | 0.9655 | 0.3213 | 0.59342 | 0.59284 | 0.31467  | 0.86742 | 0.84899 | 0.32632  | 0.57821  | 0.88676 | 1.8847   | 0.42013  | 0.1481   | 0.94251 | 2.1464  | 0.86489 | 0.05812 | 0.50197 | 0.82986  | 0.21642  | 0.92019  | 0.93201 |         |
| 6 | 138357798 | rs115681066      | 2 | 0.9163  | 0.9445 | 0.3485 | --      | --      | --       | --      | 0.59683 | 0.73122  | 0.26923  | 0.62598 | --       | --       | --       | --      | --      | --      | --      | 1.661   | 0.81087  | 0.084117 | 0.54367  |         |         |
| 6 | 138357872 | rs2206068        | 5 | 0.7906  | 1.0096 | 0.7236 | 1.129   | 0.15462 | 0.8961   | 0.9241  | 0.97246 | 0.067838 | 0.61446  | 0.94042 | 1.1267   | 0.10875  | 0.378    | 0.9761  | 0.90505 | 0.2592  | 0.24196 | 0.31635 | 0.99951  | 0.048852 | 0.63286  | 0.94655 |         |
| 6 | 138358193 | rs147312258      | 2 | 0.3692  | 0.3913 | 0.4972 | --      | --      | --       | --      | 0.86024 | 1.5614   | 0.85853  | 0.46245 | --       | --       | --       | --      | --      | --      | --      | 0.20661 | 1.406    | 0.23615  | 0.53054  |         |         |
| 6 | 138358261 | rs117521923      | 2 | 0.9118  | 0.9169 | 0.6049 | 0.5978  | 1.1389  | 0.17617  | 0.33769 | 1.3463  | 1.0794   | 0.37674  | 0.35485 | --       | --       | --       | --      | --      | --      | --      | --      | --       | --       | --       | --      |         |
| 6 | 138358274 | rs117176311      | 3 | 0.9156  | 0.9611 | 0.8447 | --      | --      | --       | --      | 1.1727  | 0.73592  | 0.60395  | 0.39918 | --       | --       | --       | --      | 0.53352 | 1.1474  | 0.27879 | 0.46073 | 0.97815  | 0.47035  | 0.59189  | 0.44279 |         |
| 6 | 138358396 | rs186156063      | 2 | 0.8725  | 1.2219 | 0.7447 | --      | --      | --       | --      | 0.86255 | 1.651    | 0.86228  | 0.46183 | --       | --       | --       | --      | --      | --      | --      | 1.9476  | 1.9701   | 0.031836 | 0.3714   |         |         |
| 6 | 138358720 | rs78702758       | 2 | 0.9083  | 0.9137 | 0.6077 | 0.59848 | 1.1371  | 0.17669  | 0.33821 | 1.3392  | 1.0808   | 0.38692  | 0.35641 | --       | --       | --       | --      | --      | --      | --      | --      | --       | --       | --       | --      |         |
| 6 | 138358880 | rs9376316        | 4 | 0.09062 | 1.0503 | 0.6589 | 1.1746  | 0.12795 | 0.18244  | 1       | 1.0384  | 0.056589 | 0.49859  | 0.94143 | 1.1213   | 0.085831 | 0.24235  | 1       | --      | --      | --      | --      | --       | 1.0317   | 0.038381 | 0.93837 | 1       |
| 6 | 138358892 | rs34700828       | 4 | 0.4753  | 1.0519 | 0.2915 | 0.91151 | 0.2437  | 0.37165  | 0.90956 | 1.026   | 0.1101   | 0.87451  | 0.93057 | 1.4908   | 0.19922  | 0.080054 | 0.95224 | --      | --      | --      | --      | 1.0089   | 0.075732 | 0.39296  | 0.9514  |         |
| 6 | 138359006 | rs190463650      | 2 | 0.8934  | 0.9129 | 0.531  | --      | --      | --       | --      | 1.2453  | 0.84158  | 0.57501  | 0.3654  | --       | --       | --       | --      | 0.50876 | 1.1548  | 0.43486 | 0.69271 | --       | --       | --       | --      |         |
| 6 | 138359303 | rs118116784      | 4 | 0.7261  | 1.0866 | 0.942  | 0.9143  | 0.92015 | 0.93107  | 0.65763 | 1.4244  | 0.50093  | 0.30484  | 0.69221 | 1.0744   | 1.0396   | 0.85738  | 0.509   | --      | --      | --      | --      | 1.0092   | 0.29232  | 0.83997  | 0.64395 |         |
| 6 | 138359307 | rs188559713      | 2 | 0.8157  | 1.1337 | 0.9463 | --      | --      | --       | --      | 1.0989  | 0.70965  | 0.79583  | 0.48771 | --       | --       | --       | --      | --      | --      | --      | --      | 1.1826   | 0.82605  | 0.51755  | 0.30746 |         |
| 6 | 138359407 | rs143867764      | 4 | 0.1121  | 0.2072 | 0.2202 | 0.19066 | 1.7892  | 0.41069  | 0.61146 | 1.6283  | 1.4642   | 0.50544  | 0.49575 | 0.013326 | 1.7613   | 0.011808 | 0.78127 | 0.24193 | 1.5583  | 0.28076 | 0.649   | --       | --       | --       | --      |         |
| 6 | 138359469 | rs193261571      | 3 | 0.9317  | 0.9594 | 0.9944 | --      | --      | --       | --      | 1.0142  | 0.98856  | 0.9804   | 0.32657 | 1.0227   | 1.1142   | 0.97766  | 0.50735 | --      | --      | --      | --      | 0.91791  | 0.6391   | 0.74062  | 0.43534 |         |
| 6 | 138359477 | rs77475227       | 4 | 0.9044  | 1.0044 | 0.5567 | 1.0996  | 0.15514 | 0.9604   | 0.90552 | 0.95828 | 0.067806 | 0.45919  | 0.92404 | 1.1324   | 0.10853  | 0.35147  | 0.96154 | --      | --      | --      | --      | 0.9542   | 0.048935 | 0.63543  | 0.93401 |         |
| 6 | 138359602 | rs184165199      | 2 | 0.7856  | 0.848  | 0.6676 | 0.3276  | 2.2964  | 0.56918  | 0.46441 | --      | --       | --       | --      | --       | --       | --       | --      | --      | --      | --      | --      | --       | 0.91062  | 0.62839  | 0.93696 | 0.38473 |
| 6 | 138359650 | rs195337727      | 3 | 0.4271  | 1.021  | 0.8975 | --      | --      | --       | --      | 1.4317  | 1.462    | 0.59823  | 0.46459 | --       | --       | --       | --      | 4.7096  | 2.1191  | 0.10275 | 0.45612 | 1.9292   | 1.3088   | 0.38508  | 0.41914 |         |
| 6 | 138359705 | rs9376317        | 4 | 0.2232  | 1.0485 | 0.7263 | 1.0352  | 0.17761 | 0.37553  | 0.96786 | 1.1225  | 0.07578  | 0.10834  | 0.97812 | 1.0701   | 0.1105   | 0.55445  | 1       | --      | --      | --      | --      | 1.0123   | 0.051658 | 0.78886  | 1       |         |
| 6 | 138359835 | rs148702820      | 2 | 0.6997  | 0.6525 | 0.9621 | --      | --      | --       | --      | 0.68015 | 1.4094   | 0.46046  | 0.48521 | --       | --       | --       | --      | --      | --      | --      | --      | 0.61034  | 1.7878   | 0.57573  | 0.35849 |         |
| 6 | 138359836 | rs184094423      | 2 | 0.941   | 0.9412 | 0.9441 | --      | --      | --       | --      | --      | --       | --       | --      | 0.87606  | 1.3109   | 0.71445  | 0.44126 | --      | --      | --      | --      | 0.98537  | 1.0477   | 0.66432  | 0.33669 |         |
| 6 | 138359887 | rs192137074      | 3 | 0.8342  | 0.8918 | 0.9949 | --      | --      | --       | --      | 0.84848 | 0.83807  | 0.58389  | 0.36599 | 0.99085  | 1.2837   | 0.9421   | 0.83524 | --      | --      | --      | --      | 0.89648  | 0.87488  | 0.84786  | 0.50226 |         |
| 6 | 138359919 | rs143459777      | 2 | 0.9566  | 0.9587 | 0.6785 | 0.69126 | 1.105   | 0.21037  | 0.33714 | 1.313   | 1.0834   | 0.42173  | 0.35897 | --       | --       | --       | --      | --      | --      | --      | --      | --       | --       | --       | --      | --      |
| 6 | 138360120 | rs182483026      | 2 | 0.8863  | 0.8942 | 0.6135 | 0.593   | 1.1279  | 1.17635  | 0.33759 | 1.3066  | 1.0837   | 0.43021  | 0.35945 | --       | --       | --       | --      | --      | --      | --      | --      | --       | --       | --       | --      | --      |
| 6 | 138360218 | rs188103858      | 2 | 0.9232  | 0.9563 | 0.9959 | --      | --      | --       | --      | 0.95385 | 0.68813  | 0.91807  | 0.56906 | --       | --       | --       | --      | 0.95841 | 0.62674 | 0.90967 | 0.36397 | --       | --       | --       | --      | --      |
| 6 | 138360242 | rs151262667      | 2 | 0.8851  | 0.8932 | 0.6129 | 0.59209 | 1.1273  | 0.17602  | 0.33755 | 1.3062  | 1.0837   | 0.43154  | 0.36006 | --       | --       | --       | --      | --      | --      | --      | --      | --       | --       | --       | --      | --      |
| 6 | 138360615 | rs150951691      | 5 | 0.8192  | 1.0072 | 0.6053 | 0.98739 | 1.45555 | 0.6201   | 0.78305 | 1.0772  | 0.060649 | 0.1524   | 0.83534 | 1.0714   | 0.095786 | 0.52321  | 0.84026 | 0.91169 | 0.23667 | 0.15672 | 0.30236 | 0.96801  | 0.042228 | 0.34621  | 0.83473 |         |
| 6 | 138360617 | rs17547131       | 5 | 0.7435  | 1.0103 | 0.5663 | 1.0336  | 0.14389 | 0.89704  | 0.81173 | 0.706   | 0.059919 | 0.16963  | 0.86812 | 1.0876   | 0.095764 | 0.45553  | 0.87573 | 0.94234 | 0.2383  | 0.36181 | 0.31393 | 0.96606  | 0.041925 | 0.46836  | 0.86488 |         |
| 6 | 138360759 | rs185461384      | 2 | 0.9437  | 0.947  | 0.6798 | 0.68571 | 1.099   | 0.20908  | 0.33683 | 1.2968  | 1.0845   | 0.44483  | 0.36137 | --       | --       | --       | --      | 0.74227 | 0.2847  | 0.43855 | 0.40666 | 0.90392  | 0.35358  | 0.79689  | 0.53675 |         |
| 6 | 138360795 | rs190121909      | 4 | 0.5219  | 0.8487 | 0.6647 | --      | --      | --       | --      | 1.306   | 0.57348  | 0.34372  | 0.48837 | 0.47086  | 0.60325  | 0.015651 | 0.625   | 0.74227 | 0.2847  | 0.43855 | 0.40666 | 0.90392  | 0.35358  | 0.79689  | 0.53675 |         |
| 6 | 138360869 | rs142660257      | 2 | 0.9028  | 0.9364 | 0.3549 | --      | --      | --       | --      | 0.59463 | 0.72837  | 0.25463  | 0.61421 | --       | --       | --       | --      | --      | --      | --      | --      | 1.6164   | 0.79861  | 0.092458 | 0.54128 |         |
| 6 | 138361317 | rs13214334       | 4 | 0.3965  | 1.0637 | 0.2769 | 0.90879 | 0.24346 | 0.37092  | 0.90129 | 1.0413  | 0.11073  | 0.76399  | 0.92366 | 1.5099   | 0.19916  | 0.068806 | 0.94546 | --      | --      | --      | --      | 1.0171   | 0.075639 | 0.33867  | 0.9527  |         |
| 6 | 138361662 | rs148018393      | 2 | 0.8963  | 0.9324 | 0.3601 | --      | --      | --       | --      | 0.59484 | 0.7275   | 0.25193  | 0.61113 | --       | --       | --       | --      | --      | --      | --      | --      | 1.5946   | 0.79482  | 0.097937 | 0.53777 |         |
| 6 | 138361722 | rs117731887      | 4 | 0.7798  | 0.9614 | 0.9832 | 0.9223  | 0.80694 | 0.9132   | 0.3509  | 1.0641  | 0.28882  | 0.65946  | 0.49632 | 0.94767  | 0.41476  | 0.77277  | 0.55013 | --      | --      | --      | --      | 0.92892  | 0.17926  | 0.81765  | 0.52568 |         |
| 6 | 138361839 | rs9389550        | 4 | 0.4126  | 1.0563 | 0.4393 | 1.2017  | 0.2643  | 0.26839  | 0.90174 | 0.96449 | 1.13483  | 0.76005  | 0.84599 | 0.82659  | 0.20656  | 0.39118  | 0.97342 | --      | --      | --      | --      | 1.1304   | 0.087298 | 0.9396   | 0.90991 |         |
| 6 | 138362090 | rs117047505      | 2 | 0.8283  | 0.8279 | 0.8495 | 0.67628 | 1.3765  | 0.35185  | 0.30576 | 0.94767 | 1.1252   | 0.92686  | 0.3223  | --       | --       | --       | --      | --      | --      | --      | --      | --       | --       | --       | --      | --      |
| 6 | 138362547 | chr6:138362547:I | 4 | 0.03047 | 0.8954 | 0.7247 | 1.0337  | 0.22335 | 0.90557  | 0.85755 | 0.93405 | 0.095151 | 0.42849  | 0.90353 | 0.78494  | 0.15945  | 0.064754 | 0.91554 | --      | --      | --      | --      | 0.88553  | 0.068397 | 0.29897  | 0.91071 |         |
| 6 | 138363064 | rs7762658        | 4 | 0.2652  | 1.0412 | 0.5599 | 0.919   | 0.16217 | 0.89756  | 1       | 1.1169  | 0.070358 | 0.10088  | 0.98809 | 0.97029  | 0.10494  | 0.81728  | 1       | --      | --      | --      | --      | 1.0339   | 0.048163 | 0.44718  | 1       |         |
| 6 | 138363149 | rs78413937       | 5 | 0.8551  | 1.0065 | 0.8937 | 1.0633  | 0.15073 | 0.77723  | 0.93607 | 0.98539 | 0.066727 | 0.7618   | 0.94349 | 1.1002   | 0.10744  | 0.49037  | 0.96077 | 0.91133 | 0.25753 | 0.26881 | 0.31488 | 0.99749  | 0.048016 | 0.44488  | 0.94459 |         |
| 6 | 138363330 | rs111902362      | 4 | 0.4505  | 1.0657 | 0.1958 | 0.92684 | 0.24701 | 0.45657  | 0.87898 | 1.042   | 0.11277  | 0.75068  | 0.90261 | 1.5539   | 0.19936  | 0.053126 | 0.95305 | --      | --      | --      | --      | 0.99019  | 0.076036 | 0.50641  | 0.96004 |         |
| 6 | 138363513 | rs191840299      | 2 | 0.1657  | 0.4025 | 0.3413 | --      | --      | --       | --      | 1.0717  | 1.2206   | 0.8      |         |          |          |          |         |         |         |         |         |          |          |          |         |         |

|   |           |                  |   |        |        |        |         |         |          |         |         |          |          |         |          |          |          |         |         |         |         |         |          |          |         |         |    |
|---|-----------|------------------|---|--------|--------|--------|---------|---------|----------|---------|---------|----------|----------|---------|----------|----------|----------|---------|---------|---------|---------|---------|----------|----------|---------|---------|----|
| 6 | 138368802 | rs189778880      | 3 | 0.8541 | 0.891  | 0.9823 | --      | --      | --       | --      | 0.97099 | 1.268    | 0.93638  | 0.37906 | 0.69157  | 1.4971   | 0.63515  | 0.55937 | --      | --      | --      | --      | 0.92783  | 0.82438  | 0.59315 | 0.33123 |    |
| 6 | 138368851 | rs117106881      | 2 | 0.8668 | 0.8875 | 0.7002 | 0.65082 | 1.0791  | 0.21219  | 0.33621 | 1.1354  | 0.96151  | 0.66068  | 0.31288 | --       | --       | --       | --      | --      | --      | --      | --      | --       | --       | --      | --      | -- |
| 6 | 138369210 | rs2876382        | 5 | 0.857  | 0.9943 | 0.625  | 0.9888  | 0.14866 | 0.51674  | 0.96582 | 1.0552  | 0.061166 | 0.41031  | 0.96339 | 1.0729   | 0.095878 | 0.7058   | 0.99446 | 0.98211 | 0.26132 | 0.81013 | 0.32306 | 0.95202  | 0.04276  | 0.18634 | 0.99508 |    |
| 6 | 138369302 | rs139598185      | 5 | 0.9583 | 1.0018 | 0.7261 | 1.033   | 0.14727 | 0.60775  | 0.96235 | 0.97494 | 0.065719 | 0.63863  | 0.96631 | 1.1474   | 0.1042   | 0.28155  | 0.98829 | 0.953   | 0.24942 | 0.57769 | 0.3159  | 0.98687  | 0.046947 | 0.43804 | 0.97134 |    |
| 6 | 138369374 | rs146640326      | 5 | 0.9913 | 1.0004 | 0.7527 | 1.0332  | 0.14788 | 0.61052  | 0.95732 | 0.97669 | 0.066206 | 0.65845  | 0.9613  | 1.1406   | 0.10449  | 0.31324  | 0.98422 | 0.95417 | 0.24949 | 0.58966 | 0.31655 | 0.98441  | 0.047166 | 0.40208 | 0.96634 |    |
| 6 | 138369682 | rs79494367       | 4 | 0.9703 | 0.9954 | 0.837  | 0.68204 | 0.6136  | 0.084591 | 0.45432 | 1.1466  | 0.22488  | 0.38514  | 0.67661 | 0.94265  | 0.47203  | 0.70827  | 0.64725 | --      | --      | --      | --      | 0.95542  | 0.16267  | 0.62028 | 0.69317 |    |
| 6 | 138369804 | rs181861541      | 3 | 0.2494 | 0.3316 | 0.946  | 0.33067 | 1.7797  | 0.41257  | 0.49336 | --      | --       | --       | --      | 0.21492  | 1.7314   | 0.00599  | 0.44127 | 0.46182 | 1.5086  | 0.37226 | 0.50273 | --       | --       | --      | --      |    |
| 6 | 138370227 | chr6:138370227-D | 3 | 0.4629 | 2.0262 | 0.1273 | 0.65363 | 1.0786  | 0.21295  | 0.33263 | 1.1596  | 0.95022  | 0.60979  | 0.30806 | 26.387   | 1.5381   | 0.20203  | 0.66911 | --      | --      | --      | --      | --       | --       | --      | --      |    |
| 6 | 138370371 | rs1997692        | 4 | 0.589  | 1.017  | 0.5376 | 0.98512 | 0.13738 | 0.95277  | 0.95306 | 1.0955  | 0.0597   | 0.11477  | 0.98733 | 1.0049   | 0.092567 | 0.98377  | 0.99419 | --      | --      | --      | --      | 0.98598  | 0.041785 | 0.64531 | 0.99391 |    |
| 6 | 138370534 | chr6:138370534-I | 2 | 0.7548 | 1.2692 | 0.8417 | --      | --      | --       | --      | 1.0717  | 1.1401   | 0.87564  | 0.3114  | 1.4563   | 1.0278   | 0.48673  | 0.60047 | --      | --      | --      | --      | --       | --       | --      | --      |    |
| 6 | 138370611 | rs7738595        | 5 | 0.2863 | 0.5587 | 0.352  | 0.22353 | 1.5102  | 0.39033  | 0.67398 | 1.2972  | 1.121    | 0.54897  | 0.38743 | 0.15697  | 1.0175   | 0.021929 | 0.90414 | 0.32778 | 1.3063  | 0.06796 | 0.35815 | 2.1773   | 1.0238   | 0.4132  | 0.49513 |    |
| 6 | 138370722 | rs11967905       | 4 | 0.4754 | 1.0481 | 0.5163 | 1.1119  | 0.26841 | 0.46784  | 0.88882 | 0.96697 | 0.13252  | 0.78045  | 0.86324 | 0.83217  | 0.20651  | 0.41387  | 0.9772  | --      | --      | --      | --      | 1.1207   | 0.085471 | 0.96039 | 0.92886 |    |
| 6 | 138370914 | rs140865265      | 5 | 0.9071 | 1.0041 | 0.8009 | 1.0407  | 0.14974 | 0.65887  | 0.94191 | 0.99312 | 0.066277 | 0.85605  | 0.96679 | 1.1316   | 0.10609  | 0.33049  | 0.97555 | 0.93732 | 0.24908 | 0.4517  | 0.32231 | 0.98419  | 0.047796 | 0.56088 | 0.9601  |    |
| 6 | 138370933 | rs138858563      | 5 | 0.931  | 1.003  | 0.7912 | 1.0355  | 0.14985 | 0.62993  | 0.93729 | 0.99283 | 0.066359 | 0.84758  | 0.96318 | 1.1355   | 0.10619  | 0.32167  | 0.97146 | 0.93452 | 0.24888 | 0.42744 | 0.32152 | 0.98271  | 0.047826 | 0.53106 | 0.95585 |    |
| 6 | 138370939 | rs9494927        | 4 | 0.1311 | 1.0506 | 0.617  | 0.92746 | 0.14426 | 0.88573  | 0.95274 | 1.1112  | 0.063584 | 0.087318 | 0.96583 | 1.0765   | 0.095787 | 0.51505  | 0.98763 | --      | --      | --      | --      | 1.3023   | 0.043247 | 0.22121 | 0.98812 |    |
| 6 | 138371364 | rs9389552        | 5 | 0.8925 | 0.9957 | 0.6433 | 0.9882  | 0.14932 | 0.51254  | 0.96352 | 1.055   | 0.061359 | 0.41018  | 0.99094 | 1.0746   | 0.096024 | 0.6938   | 0.99105 | 0.98104 | 0.26132 | 0.79933 | 0.32278 | 0.95425  | 0.04291  | 0.19347 | 0.99023 |    |
| 6 | 138371365 | rs146629168      | 5 | 0.9963 | 1.0002 | 0.702  | 1.0317  | 0.14623 | 0.60503  | 0.97071 | 0.9784  | 0.065146 | 0.68123  | 0.97831 | 1.1505   | 0.10391  | 0.27111  | 0.99244 | 0.94088 | 0.24811 | 0.46905 | 0.31715 | 0.98242  | 0.046579 | 0.37764 | 0.97993 |    |
| 6 | 138371761 | rs145381765      | 4 | 0.9118 | 1.0245 | 0.802  | 1.2566  | 0.91525 | 0.7225   | 0.34467 | 0.67978 | 0.43648  | 0.26135  | 0.53236 | 1.6481   | 0.66191  | 0.24728  | 0.94946 | --      | --      | --      | --      | 1.0389   | 0.28567  | 0.8865  | 0.55981 |    |
| 6 | 138371802 | rs4571588        | 5 | 0.9852 | 0.9994 | 0.5205 | 1.0092  | 0.14931 | 0.63085  | 0.93545 | 1.0713  | 0.061206 | 0.27859  | 0.97677 | 1.0763   | 0.096202 | 0.6714   | 0.96762 | 0.99276 | 0.26154 | 0.9129  | 0.31934 | 0.95081  | 0.043052 | 0.1482  | 0.97071 |    |
| 6 | 138372235 | rs4445071        | 4 | 0.1378 | 0.9419 | 0.9486 | 0.94337 | 1.1773  | 0.64198  | 0.94666 | 0.96921 | 0.07998  | 0.67443  | 0.94467 | 0.98115  | 0.12971  | 0.72029  | 0.98368 | --      | --      | --      | --      | 0.9242   | 0.052214 | 0.19878 | 0.97804 |    |
| 6 | 138372295 | rs146846472      | 5 | 0.972  | 1.0012 | 0.7054 | 1.0303  | 0.1462  | 0.59812  | 0.97025 | 0.97837 | 0.065143 | 0.68016  | 0.97776 | 1.1512   | 0.10389  | 0.26856  | 0.99242 | 0.94074 | 0.24811 | 0.4678  | 0.31711 | 0.98435  | 0.046572 | 0.40679 | 0.97956 |    |
| 6 | 138372322 | rs4601146        | 5 | 0.8398 | 0.9935 | 0.605  | 0.9871  | 0.14954 | 0.503    | 0.95629 | 1.0573  | 0.061363 | 0.38612  | 0.97605 | 1.0704   | 0.096147 | 0.71911  | 0.98211 | 0.99874 | 0.26239 | 0.97791 | 0.31329 | 0.94992  | 0.042934 | 0.17029 | 0.9811  |    |
| 6 | 138372625 | rs35179728       | 4 | 0.4157 | 0.9623 | 0.6157 | 1.0502  | 0.20517 | 0.74535  | 0.89111 | 1.0154  | 0.087479 | 0.87013  | 0.9577  | 1.0628   | 0.14577  | 0.72361  | 0.97035 | --      | --      | --      | --      | 0.90982  | 0.063768 | 0.68301 | 0.97194 |    |
| 6 | 138372680 | rs140653574      | 5 | 0.8441 | 1.0382 | 0.974  | 1.0791  | 0.71294 | 0.89043  | 0.38295 | 0.86028 | 0.38096  | 0.47711  | 1.53559 | 1.155    | 0.62099  | 0.68976  | 0.4103  | 0.7157  | 1.0965  | 0.32942 | 0.30176 | 1.1276   | 0.25674  | 0.27704 | 0.41263 |    |
| 6 | 138372776 | rs12665011       | 4 | 0.5902 | 1.017  | 0.5104 | 0.96867 | 0.13628 | 0.92505  | 0.96021 | 1.0977  | 0.059869 | 1.0504   | 0.98157 | 1.0084   | 0.092851 | 0.98924  | 0.99203 | --      | --      | --      | --      | 0.98596  | 0.041859 | 0.64618 | 0.99208 |    |
| 6 | 138372865 | rs79612338       | 4 | 0.9573 | 1.0019 | 0.5273 | 1.0386  | 0.14565 | 0.64346  | 0.9767  | 0.97856 | 0.065057 | 0.68442  | 0.98004 | 1.1538   | 0.10389  | 0.25907  | 0.99287 | --      | --      | --      | --      | 0.98203  | 0.046544 | 0.38998 | 0.98215 |    |
| 6 | 138372876 | rs77542578       | 2 | 0.8129 | 0.8018 | 0.5002 | --      | --      | --       | --      | 1.246   | 1.1394   | 0.64011  | 0.43295 | 0.32664  | 1.6263   | 0.10315  | 0.67971 | --      | --      | --      | --      | --       | --       | --      | --      |    |
| 6 | 138372887 | rs147411940      | 2 | 0.9335 | 0.9528 | 0.7112 | --      | --      | --       | --      | 0.86332 | 0.63835  | 0.58084  | 0.42636 | 1.5217   | 1.3913   | 0.51469  | 0.35654 | --      | --      | --      | --      | --       | --       | --      | --      |    |
| 6 | 138372890 | rs138098355      | 4 | 0.6944 | 1.1396 | 0.9614 | 0.53304 | 1.486   | 0.36695  | 0.4698  | 1.1893  | 0.57911  | 0.71066  | 0.69054 | 1.2618   | 0.63896  | 0.76115  | 0.6445  | --      | --      | --      | --      | 1.1279   | 0.56298  | 0.98757 | 0.52812 |    |
| 6 | 138373074 | rs12529513       | 4 | 0.4337 | 1.0237 | 0.4582 | 1.2045  | 0.26057 | 0.27349  | 0.92177 | 0.96268 | 1.3259   | 0.77935  | 0.87047 | 0.82695  | 0.20579  | 0.38968  | 0.97876 | --      | --      | --      | --      | 1.1205   | 0.085295 | 0.98778 | 0.93956 |    |
| 6 | 138373439 | chr6:138373439-I | 5 | 0.9647 | 0.9985 | 0.7058 | 1.0383  | 0.14625 | 0.63458  | 0.97527 | 0.97829 | 0.064948 | 0.68058  | 0.98212 | 1.1465   | 0.1041   | 0.28297  | 0.99371 | 0.93742 | 0.24072 | 0.44609 | 0.32164 | 0.97984  | 0.046542 | 0.3504  | 0.98549 |    |
| 6 | 138373516 | rs12193299       | 4 | 0.2808 | 0.9336 | 0.8902 | 0.82886 | 0.78227 | 0.41415  | 0.87628 | 0.89888 | 1.2005   | 0.32058  | 0.94334 | 0.86435  | 0.22354  | 0.92086  | --      | --      | --      | --      | 0.97135 | 0.083408 | 0.86508  | 0.93595 |         |    |
| 6 | 138373560 | chr6:138373560-D | 4 | 0.5313 | 1.0417 | 0.5501 | 1.1088  | 0.26557 | 0.4806   | 0.90955 | 0.9667  | 0.1321   | 0.78232  | 0.87242 | 0.83166  | 0.20634  | 0.41017  | 0.97865 | --      | --      | --      | --      | 1.1088   | 0.084726 | 0.91517 | 0.94914 |    |
| 6 | 138373646 | rs4624887        | 5 | 0.1708 | 1.0508 | 0.8182 | 0.9543  | 0.16401 | 0.67175  | 0.98711 | 1.1237  | 0.070812 | 0.85058  | 0.98978 | 0.99647  | 0.10783  | 0.9655   | 0.98738 | 1.0438  | 0.25173 | 0.59984 | 0.3104  | 1.0382   | 0.048421 | 0.40253 | 0.99351 |    |
| 6 | 138373793 | rs186430596      | 4 | 0.1144 | 0.0582 | 0.0033 | 0.18002 | 1.7111  | 0.42611  | 0.62291 | 1.3052  | 1.7248   | 0.75773  | 0.49513 | 0.000262 | 1.7459   | 0.010337 | 0.80352 | 0.17159 | 1.5638  | 0.24514 | 0.67884 | --       | --       | --      | --      |    |
| 6 | 138373967 | rs9494928        | 2 | 0.7621 | 1.1209 | 0.7536 | --      | --      | --       | --      | --      | --       | --       | --      | 1.4334   | 0.8696   | 0.23256  | 0.36708 | --      | --      | --      | --      | 1.0589   | 0.41815  | 0.74667 | 0.34314 |    |
| 6 | 138374058 | rs12530033       | 4 | 0.5382 | 1.041  | 0.5621 | 1.1082  | 0.26546 | 0.48152  | 0.91038 | 0.96924 | 0.1323   | 0.79939  | 0.87284 | 0.83143  | 0.20633  | 0.40907  | 0.9787  | --      | --      | --      | --      | 1.1063   | 0.084694 | 0.89024 | 0.94985 |    |
| 6 | 138374293 | rs13217392       | 4 | 0.1302 | 0.9408 | 0.945  | 0.92057 | 0.17651 | 0.53266  | 0.95364 | 0.96697 | 0.080037 | 0.65197  | 0.94433 | 0.98614  | 0.122951 | 0.75463  | 0.98471 | --      | --      | --      | --      | 0.92449  | 0.052228 | 0.2104  | 0.98153 |    |
| 6 | 138374378 | rs72984605       | 4 | 0.9958 | 1.001  | 0.3321 | 2.3589  | 0.74112 | 0.005116 | 0.59296 | 0.78732 | 0.29112  | 0.30432  | 0.78684 | 0.53107  | 0.66408  | 0.904811 | 0.61645 | --      | --      | --      | --      | 1.1814   | 0.23762  | 0.95414 | 0.62118 |    |
| 6 | 138374383 | rs7755984        | 5 | 0.3001 | 0.5668 | 0.3457 | 0.2236  | 1.5099  | 0.39077  | 0.67564 | 1.3375  | 1.1077   | 0.49603  | 0.38466 | 0.15736  | 1.015    | 0.023305 | 0.90989 | 0.33288 | 1.3176  | 0.07504 | 0.35741 | 1.1738   | 1.0202   | 0.42174 | 0.49971 |    |
| 6 | 138374694 | rs111842674      | 4 | 0.9674 | 1.0042 | 0.884  | 1.0287  | 0.51871 | 0.54509  | 0.50448 | 0.91923 | 0.18593  | 0.48134  | 0.66095 | 1.2299   | 0.31185  | 0.34807  | 0.58308 | --      | --      | --      | --      | 1.0117   | 0.13912  | 0.87646 | 0.55885 |    |
| 6 | 138374708 | rs191318181      | 2 | 0.9723 | 1.0312 | 0.9907 | --      | --      | --       | --      | 1.0461  | 1.5192   | 0.93519  | 0.41329 | --       | --       | --       | --      | --      | --      | --      | --      | 1.0236   | 1.0901   | 0.76601 | 0.55287 |    |
| 6 | 138374905 | rs35744607       | 4 | 0.4416 | 0.9648 | 0.6141 | 1.0505  | 0.20506 | 0.74497  | 0.8933  | 1.0236  | 0.086354 | 0.79294  | 0.97143 | 1.0535   | 0.14438  | 0.77368  | 0.97957 | --      | --      | --      | --      | 0.91248  | 0.062682 | 0.71566 | 0.98808 |    |

|   |           |                  |   |        |        |        |         |         |         |         |         |          |          |         |         |          |          |         |         |         |         |         |          |          |          |         |         |         |
|---|-----------|------------------|---|--------|--------|--------|---------|---------|---------|---------|---------|----------|----------|---------|---------|----------|----------|---------|---------|---------|---------|---------|----------|----------|----------|---------|---------|---------|
| 6 | 138379797 | chr6:138379797:D | 4 | 0.7692 | 1.0096 | 0.7547 | 1.0619  | 0.13498 | 0.92649 | 0.96194 | 0.96109 | 0.061633 | 0.47148  | 0.95517 | 1.0727  | 0.097309 | 0.57756  | 0.98386 | --      | --      | --      | --      | 1.0168   | 0.043539 | 0.40445  | 0.97301 |         |         |
| 6 | 138379992 | rs35039060       | 4 | 0.1671 | 0.9458 | 0.9305 | 0.95798 | 0.17649 | 0.69215 | 0.94994 | 0.96837 | 0.080105 | 0.6653   | 0.94106 | 1.002   | 0.1291   | 0.85969  | 0.98218 | --      | --      | --      | --      | 0.92658  | 0.052188 | 0.22235  | 0.97883 |         |         |
| 6 | 138380341 | rs9402940        | 5 | 0.7869 | 0.9914 | 0.5632 | 0.99232 | 0.14856 | 0.53411 | 0.97006 | 1.0551  | 0.061481 | 0.40944  | 0.9875  | 1.0774  | 0.09606  | 0.67731  | 0.99066 | 0.98217 | 0.26139 | 0.8106  | 0.32293 | 0.94603  | 0.042932 | 0.1498   | 0.98928 |         |         |
| 6 | 138380450 | rs188407764      | 3 | 0.8793 | 1.0649 | 0.8839 | --      | --      | --      | --      | 0.99339 | 0.70404  | 0.99126  | 0.40751 | 1.8958  | 1.2327   | 0.23474  | 0.35664 | --      | --      | --      | --      | 0.98717  | 0.56261  | 0.50468  | 0.36463 |         |         |
| 6 | 138380522 | rs9385819        | 4 | 0.5885 | 1.0359 | 0.5956 | 1.1043  | 0.26479 | 0.49297 | 0.91298 | 0.96856 | 0.13205  | 0.79319  | 0.86988 | 0.83393 | 0.20599  | 0.4129   | 0.97776 | --      | --      | --      | --      | 1.0973   | 0.08454  | 0.80521  | 0.94912 |         |         |
| 6 | 138380619 | rs9385820        | 4 | 0.5494 | 1.0396 | 0.4885 | 1.1962  | 0.257   | 0.29654 | 0.93353 | 0.96641 | 0.13141  | 0.77982  | 0.8756  | 0.81751 | 0.20446  | 0.35223  | 0.97785 | --      | --      | --      | --      | 1.0994   | 0.084374 | 0.77751  | 0.95237 |         |         |
| 6 | 138380698 | rs117020407      | 4 | 0.4626 | 1.0609 | 0.8951 | 1.0797  | 0.34637 | 0.43497 | 0.50058 | 1.0975  | 0.15547  | 0.20065  | 0.49357 | 0.88825 | 0.24358  | 0.27281  | 0.50115 | --      | --      | --      | --      | 1.0786   | 0.10681  | 0.29609  | 0.4844  |         |         |
| 6 | 138380711 | chr6:138380711:D | 4 | 0.8691 | 1.025  | 0.9501 | 1.0872  | 0.62767 | 0.53618 | 0.34983 | 0.92727 | 0.27018  | 0.4756   | 0.36854 | 0.91242 | 0.44556  | 0.6011   | 0.38073 | --      | --      | --      | --      | 1.1073   | 0.20718  | 0.17054  | 0.34705 |         |         |
| 6 | 138380714 | chr6:138380714:D | 5 | 0.8392 | 1.0318 | 0.9855 | 1.1875  | 0.68679 | 0.33217 | 0.32876 | 0.94074 | 0.29499  | 0.56545  | 0.34066 | 0.86893 | 0.48444  | 0.39741  | 0.36302 | 1.0672  | 0.54133 | 0.71677 | 0.31118 | 1.1031   | 0.21994  | 0.25575  | 0.3255  |         |         |
| 6 | 138380978 | rs146194929      | 5 | 0.9858 | 0.9994 | 0.6992 | 1.0256  | 0.14538 | 0.57376 | 0.98243 | 0.97563 | 0.064773 | 0.6501   | 0.98713 | 1.1507  | 0.27057  | 0.99698  | 0.942   | 0.42838 | 0.48155 | 0.3169  | 0.98316 | 0.046311 | 0.39894  | 0.99069  |         |         |         |
| 6 | 138381075 | rs142125401      | 3 | 0.5479 | 1.6336 | 0.2197 | 0.6388  | 1.067   | 0.2036  | 0.33452 | 1.1468  | 0.95193  | 0.63124  | 0.3033  | 15.783  | 1.5473   | 0.18449  | 0.95919 | --      | --      | --      | --      | --       | --       | --       | --      |         |         |
| 6 | 138381102 | rs151157058      | 3 | 0.8888 | 0.9116 | 0.907  | 0.63129 | 0.10636 | 0.19957 | 0.33799 | 1.1616  | 0.95227  | 0.60438  | 0.30657 | --      | --       | --       | --      | --      | --      | --      | --      | 1.1072   | 1.8364   | 0.65972  | 0.30317 |         |         |
| 6 | 138381106 | chr6:138381106:I | 4 | 0.4874 | 0.9671 | 0.7139 | 1.0352  | 0.2144  | 0.76025 | 0.84793 | 1.0302  | 0.089116 | 0.72866  | 0.9341  | 1.0242  | 0.14847  | 0.91616  | 0.94955 | --      | --      | --      | --      | 0.91926  | 0.064981 | 0.81068  | 0.95069 |         |         |
| 6 | 138381180 | rs186992152      | 3 | 0.5444 | 1.6467 | 0.215  | 0.63865 | 1.0668  | 0.20352 | 0.33455 | 1.1472  | 0.95194  | 0.6302   | 0.30324 | 16.114  | 1.5471   | 0.18366  | 0.59427 | --      | --      | --      | --      | --       | --       | --       | --      |         |         |
| 6 | 138381184 | chr6:138381184:I | 5 | 0.9681 | 0.9986 | 0.5522 | 1.0055  | 0.15146 | 0.49258 | 0.88897 | 0.96475 | 0.06706  | 0.50895  | 0.91305 | 1.1861  | 0.10753  | 0.14164  | 0.92971 | 0.91517 | 0.25244 | 0.26271 | 0.30906 | 0.98461  | 0.047892 | 0.46485  | 0.91743 |         |         |
| 6 | 138381458 | rs71560655       | 4 | 0.4401 | 1.0535 | 0.3147 | 0.89522 | 0.23765 | 0.3614  | 0.92587 | 1.0484  | 0.11001  | 0.70692  | 0.92763 | 1.4545  | 0.19392  | 0.077614 | 0.94975 | --      | --      | --      | --      | 1.0089   | 0.075773 | 0.33111  | 0.98095 |         |         |
| 6 | 138381508 | rs182151400      | 2 | 0.1307 | 0.4014 | 0.9498 | --      | --      | --      | --      | 0.36192 | 1.7512   | 0.23978  | 0.45456 | 0.40706 | 0.64347  | 0.11923  | 0.85546 | --      | --      | --      | --      | --       | --       | --       | --      |         |         |
| 6 | 138381680 | rs75622022       | 4 | 0.9984 | 1.0001 | 0.5253 | 1.0326  | 0.14487 | 0.61246 | 0.98677 | 0.97536 | 0.064839 | 0.64772  | 0.98829 | 1.1526  | 0.10376  | 0.26403  | 0.99662 | --      | --      | --      | --      | --       | --       | 0.98145  | 0.04632 | 0.38313 | 0.99257 |
| 6 | 138381691 | rs75765446       | 4 | 0.9934 | 1.0003 | 0.5483 | 1.0314  | 0.14508 | 0.60523 | 0.98528 | 0.97519 | 0.06504  | 0.64571  | 0.98551 | 1.1486  | 0.10382  | 0.27724  | 0.99519 | --      | --      | --      | --      | 0.98263  | 0.046385 | 0.39574  | 0.99068 |         |         |
| 6 | 138381732 | rs77941786       | 5 | 0.9825 | 0.9993 | 0.6991 | 1.0251  | 0.14535 | 0.57112 | 0.9828  | 0.97548 | 0.064767 | 0.64848  | 0.98747 | 1.1506  | 0.377    | 0.2712   | 0.99739 | 0.94198 | 0.24838 | 0.48133 | 0.31689 | 0.98305  | 0.046303 | 0.39803  | 0.99115 |         |         |
| 6 | 138381775 | rs74694555       | 5 | 0.9824 | 0.9992 | 0.6991 | 1.025   | 0.14535 | 0.57094 | 0.98283 | 0.97548 | 0.064767 | 0.6484   | 0.98749 | 1.1506  | 0.1037   | 0.27122  | 0.99741 | 0.94198 | 0.24838 | 0.48137 | 0.31689 | 0.98305  | 0.046303 | 0.39805  | 0.99118 |         |         |
| 6 | 138381943 | rs117933066      | 4 | 0.577  | 0.9028 | 0.8378 | 0.75623 | 0.92256 | 0.33964 | 0.32834 | 0.69302 | 0.38756  | 0.13641  | 0.62257 | 1.328   | 0.75026  | 0.47925  | 0.40578 | --      | --      | --      | --      | 0.9622   | 0.22299  | 0.081249 | 0.59489 |         |         |
| 6 | 138382115 | rs77156674       | 5 | 0.9785 | 1.0009 | 0.6619 | 1.0073  | 0.14585 | 0.45687 | 0.95832 | 0.97705 | 0.064678 | 0.66482  | 0.97805 | 1.1632  | 0.10357  | 0.22743  | 0.99466 | 0.96338 | 0.24984 | 0.65032 | 0.30881 | 0.98404  | 0.046322 | 0.41349  | 0.98839 |         |         |
| 6 | 138382147 | rs76157688       | 4 | 0.9993 | 1      | 0.5248 | 1.0323  | 0.14486 | 0.61116 | 0.98698 | 0.97527 | 0.064834 | 0.64667  | 0.9886  | 1.1526  | 0.10375  | 0.26437  | 0.99691 | --      | --      | --      | --      | 0.98135  | 0.046315 | 0.381    | 0.99291 |         |         |
| 6 | 138382164 | rs78685093       | 4 | 0.9987 | 0.9999 | 0.5242 | 1.0337  | 0.14484 | 0.61754 | 0.9879  | 0.97522 | 0.064836 | 0.64622  | 0.98876 | 1.1529  | 0.10377  | 0.26325  | 0.99679 | --      | --      | --      | --      | 0.98115  | 0.046319 | 0.38089  | 0.99315 |         |         |
| 6 | 138382332 | rs80246408       | 4 | 0.9988 | 1.0001 | 0.5185 | 1.0377  | 0.14454 | 0.6415  | 0.98872 | 0.97509 | 0.064834 | 0.64478  | 0.98888 | 1.1529  | 0.10376  | 0.26323  | 0.99691 | --      | --      | --      | --      | 0.981    | 0.046316 | 0.37867  | 0.99327 |         |         |
| 6 | 138382374 | rs75431893       | 4 | 0.9995 | 1      | 0.5189 | 1.0372  | 0.14456 | 0.63903 | 0.98814 | 0.97516 | 0.064832 | 0.64557  | 0.98895 | 1.1529  | 0.10376  | 0.26318  | 0.99693 | --      | --      | --      | --      | 0.98096  | 0.046316 | 0.37821  | 0.9933  |         |         |
| 6 | 138382548 | rs13746409       | 4 | 0.8305 | 1.0361 | 0.6188 | 1.5469  | 0.58495 | 0.12953 | 0.51238 | 0.86439 | 0.27678  | 0.46513  | 0.71549 | 0.64587 | 0.6288   | 0.22666  | 0.61404 | --      | --      | --      | --      | 1.1842   | 0.23642  | 0.97266  | 0.61445 |         |         |
| 6 | 138382608 | rs12717186       | 4 | 0.2039 | 0.9502 | 0.8151 | 0.9927  | 0.17635 | 0.91867 | 0.97127 | 0.94679 | 0.08015  | 0.47132  | 0.93606 | 1.0577  | 0.12602  | 0.78887  | 0.98309 | --      | --      | --      | --      | 0.93085  | 0.052098 | 0.26574  | 0.97989 |         |         |
| 6 | 138382638 | rs13217909       | 4 | 0.4805 | 1.0462 | 0.7108 | 1.0688  | 0.26024 | 0.58801 | 0.89732 | 1.0219  | 0.129    | 0.85088  | 0.85031 | 0.84546 | 0.20526  | 0.44179  | 0.96731 | --      | --      | --      | --      | 1.0914   | 0.082912 | 0.76951  | 0.93971 |         |         |
| 6 | 138382675 | rs12111165       | 5 | 0.9477 | 0.9978 | 0.6713 | 1.0356  | 0.14484 | 0.62947 | 0.98595 | 0.97443 | 0.064786 | 0.63631  | 0.98674 | 1.1525  | 0.10362  | 0.26336  | 0.99773 | 0.93952 | 0.24812 | 0.4624  | 0.31798 | 0.97959  | 0.04628  | 0.362    | 0.99174 |         |         |
| 6 | 138382860 | rs12111172       | 4 | 0.95   | 0.9978 | 0.473  | 1.0361  | 0.14412 | 0.6216  | 1       | 0.97104 | 0.065321 | 0.60845  | 1       | 1.1589  | 0.10365  | 0.24158  | 1       | --      | --      | --      | --      | 0.97812  | 0.046187 | 0.35176  | 1       |         |         |
| 6 | 138382903 | rs4895509        | 4 | 0.896  | 0.994  | 0.2324 | 1.011   | 0.15089 | 0.61792 | 0.97576 | 1.0977  | 0.066132 | 0.12379  | 0.95927 | 0.86688 | 0.10107  | 0.14387  | 0.9784  | --      | --      | --      | --      | 0.97429  | 0.046258 | 0.84601  | 0.98313 |         |         |
| 6 | 138382922 | rs6940999        | 4 | 0.9718 | 0.9988 | 0.5098 | 1.0365  | 0.14457 | 0.62658 | 0.99396 | 0.97419 | 0.064844 | 0.63592  | 0.99342 | 1.1532  | 0.10376  | 0.26201  | 0.99728 | --      | --      | --      | --      | 0.9793   | 0.046285 | 0.36095  | 0.99491 |         |         |
| 6 | 138382925 | rs71547132       | 4 | 0.3695 | 1.0672 | 0.2796 | 0.89555 | 0.22719 | 0.35646 | 0.97288 | 1.0762  | 0.11414  | 0.51842  | 0.87166 | 1.4732  | 0.19333  | 0.067448 | 0.95485 | --      | --      | --      | --      | 1.0116   | 0.076262 | 0.30392  | 0.97963 |         |         |
| 6 | 138383470 | rs142035264      | 4 | 0.9256 | 1.0355 | 0.8332 | --      | --      | --      | --      | 1.2356  | 0.6119   | 0.41941  | 0.40856 | 0.61344 | 1.2564   | 0.35451  | 0.45816 | 2.834   | 1.434   | 0.09099 | 0.4337  | 0.85871  | 0.5453   | 0.39412  | 0.392   |         |         |
| 6 | 138383483 | rs11755324       | 4 | 0.256  | 1.0429 | 0.4714 | 0.94019 | 0.16505 | 0.80627 | 0.99092 | 1.1252  | 0.071743 | 0.086268 | 0.988   | 0.93445 | 0.10995  | 0.52571  | 0.98643 | --      | --      | --      | --      | 1.0382   | 0.048865 | 0.39786  | 0.99302 |         |         |
| 6 | 138383568 | rs183523507      | 2 | 0.9581 | 1.0305 | 0.9799 | --      | --      | --      | --      | --      | --       | --       | --      | 1.0623  | 1.336    | 0.94926  | 0.32244 | --      | --      | --      | --      | 1.0235   | 0.63422  | 0.9726   | 0.38435 |         |         |
| 6 | 138384137 | rs111574448      | 4 | 0.3633 | 1.0582 | 0.367  | 0.93015 | 0.24475 | 0.4851  | 0.90438 | 1.0722  | 0.11495  | 0.55646  | 0.89049 | 1.4392  | 0.19413  | 0.087601 | 0.95516 | --      | --      | --      | --      | 1.0102   | 0.076646 | 0.31229  | 0.97834 |         |         |
| 6 | 138384302 | rs12664521       | 4 | 0.1695 | 0.8717 | 0.2121 | 1.3019  | 0.31582 | 0.55631 | 0.92755 | 0.99835 | 0.13701  | 0.95212  | 0.86938 | 0.7693  | 0.20412  | 0.15951  | 0.95107 | --      | --      | --      | --      | 0.76432  | 0.10301  | 0.043977 | 0.94729 |         |         |
| 6 | 138384493 | rs181503262      | 2 | 0.6459 | 0.9987 | 0.7496 | --      | --      | --      | --      | 0.80163 | 0.42699  | 0.16358  | 0.36573 | --      | --       | --       | --      | --      | --      | --      | --      | 0.94302  | 0.27692  | 0.42461  | 0.37026 |         |         |
| 6 | 138384511 | chr6:138384511:D | 4 | 0.1145 | 0.9231 | 0.9092 | 0.90807 | 0.22269 | 0.15721 | 0.51588 | 0.97994 | 0.09574  | 0.72393  | 0.59038 | 0.90692 | 0.14671  | 0.22318  | 0.64051 | --      | --      | --      | --      | 0.90025  | 0.06842  | 0.027179 | 0.60406 |         |         |
| 6 | 138384594 | rs187038734      | 2 | 0.8795 | 0.7957 | 0.4646 | 2.249   | 2.0719  | 0.85286 | 0.69274 | --      | --       | --       | --      | --      | --       | --       | --      | --      | --      | --      | --      | 0.24677  | 2.1993   | 0.55171  | 0.63178 |         |         |
| 6 | 138384607 | rs190935708      | 2 | 0.7467 | 0.7586 | 0.7001 | 0.60789 | 1.0306  | 0.17751 | 0.      |         |          |          |         |         |          |          |         |         |         |         |         |          |          |          |         |         |         |

|   |           |                  |   |        |        |        |         |         |          |         |          |          |          |         |         |          |          |         |         |         |         |         |         |          |          |         |
|---|-----------|------------------|---|--------|--------|--------|---------|---------|----------|---------|----------|----------|----------|---------|---------|----------|----------|---------|---------|---------|---------|---------|---------|----------|----------|---------|
| 6 | 138390664 | rs59840660       | 4 | 0.2054 | 0.9505 | 0.6996 | 0.94241 | 0.17477 | 0.67708  | 0.99417 | 0.93705  | 0.080116 | 0.38938  | 0.92867 | 1.0949  | 0.12516  | 0.57197  | 0.99377 | --      | --      | --      | --      | 0.93394 | 0.051949 | 0.30826  | 0.99195 |
| 6 | 138390884 | rs1141431813     | 2 | 0.5153 | 0.5587 | 0.7509 | --      | --      | --       | --      | 0.99104  | 2.015    | 0.96068  | 0.51393 | --      | --       | --       | --      | --      | --      | --      | --      | 0.48532 | 0.99862  | 0.70985  | 0.85178 |
| 6 | 138390917 | rs73774613       | 4 | 0.9972 | 0.9982 | 0.2774 | 0.68584 | 2.0237  | 0.64349  | 0.41014 | 3.0057   | 0.78686  | 0.011268 | 0.50275 | --      | --       | --       | --      | 1.2631  | 1.0462  | 0.60742 | 0.44782 | 0.45821 | 0.57308  | 0.14384  | 0.68671 |
| 6 | 138390953 | rs10872482       | 5 | 0.5934 | 0.9847 | 0.7365 | 1.0646  | 0.12407 | 0.9991   | 0.99924 | 0.94516  | 0.056699 | 0.27586  | 0.94098 | 1.0786  | 0.08867  | 0.56087  | 0.99893 | 0.98673 | 0.21151 | 0.85874 | 0.30581 | 0.97902 | 0.038415 | 0.095454 | 0.99803 |
| 6 | 138391399 | rs2253437        | 4 | 0.3104 | 1.0381 | 0.5159 | 0.92769 | 0.16477 | 0.86148  | 1       | 1.1101   | 0.071777 | 0.12601  | 1       | 0.93301 | 0.10985  | 0.51798  | 1       | --      | --      | --      | --      | 1.0381  | 0.048764 | 0.42087  | 1       |
| 6 | 138391562 | rs9321647        | 4 | 0.6155 | 0.9855 | 0.5909 | 1.0645  | 0.12402 | 0.99855  | 1       | 0.94823  | 0.056608 | 0.30422  | 0.94173 | 1.0784  | 0.088659 | 0.56331  | 1       | --      | --      | --      | --      | 0.97907 | 0.038391 | 0.093593 | 1       |
| 6 | 138392228 | rs9494934        | 5 | 0.3034 | 0.5957 | 0.4428 | 0.32561 | 1.4857  | 0.45834  | 0.68072 | 1.2655   | 1.1107   | 0.52993  | 0.33758 | 0.16779 | 1.0118   | 0.024558 | 0.89365 | 0.3344  | 1.315   | 0.07029 | 0.34964 | 1.7788  | 0.94141  | 0.56892  | 0.45518 |
| 6 | 138392365 | rs185604505      | 4 | 0.9478 | 1.0115 | 0.9138 | 1.3264  | 0.66162 | 0.85997  | 0.33963 | 0.83444  | 0.34591  | 0.10601  | 0.33488 | 1.0726  | 0.50341  | 0.74798  | 0.47059 | --      | --      | --      | --      | 1.0551  | 0.23583  | 0.56491  | 0.40752 |
| 6 | 138392484 | rs60708770       | 3 | 0.9377 | 1.026  | 0.5475 | 0.5141  | 0.85335 | 0.099113 | 0.39546 | --       | --       | --       | --      | 2.0746  | 0.95403  | 0.31977  | 0.62411 | --      | --      | --      | --      | 1.0529  | 0.38383  | 0.39185  | 0.71738 |
| 6 | 138392857 | rs140985410      | 4 | 0.7466 | 0.9315 | 0.9296 | 0.58604 | 1.0128  | 0.49376  | 0.43024 | 0.80002  | 0.51755  | 0.30473  | 0.41524 | 0.78691 | 0.81381  | 0.54728  | 0.43301 | --      | --      | --      | --      | 1.0171  | 0.26274  | 0.63708  | 0.55003 |
| 6 | 138392858 | rs80186633       | 3 | 0.6683 | 0.7782 | 0.6138 | 0.73609 | 2.1711  | 0.71186  | 0.44514 | 2.1652   | 1.1975   | 0.055779 | 0.31475 | --      | --       | --       | --      | --      | --      | --      | --      | 0.54865 | 0.70566  | 0.30008  | 0.62766 |
| 6 | 138393028 | rs10440882       | 4 | 0.2141 | 0.9515 | 0.6557 | 0.92227 | 0.17443 | 0.56944  | 1       | 0.93734  | 0.080253 | 0.39182  | 0.92651 | 1.1056  | 0.1249   | 0.52767  | 1       | --      | --      | --      | --      | 0.93565 | 0.051802 | 0.33876  | 1       |
| 6 | 138393314 | rs643571         | 4 | 0.4548 | 1.0588 | 0.2248 | 0.86727 | 0.22192 | 0.28527  | 1       | 1.039    | 0.11024  | 0.7575   | 0.87185 | 1.4708  | 0.18353  | 0.059806 | 1       | --      | --      | --      | --      | 1.0122  | 0.073682 | 0.2461   | 1       |
| 6 | 138393618 | rs115203408      | 2 | 0.8966 | 1.1034 | 0.5671 | --      | --      | --       | --      | --       | --       | --       | --      | 0.54918 | 1.4349   | 0.39591  | 0.71063 | --      | --      | --      | --      | 1.444   | 0.89103  | 0.019478 | 0.55075 |
| 6 | 138393994 | rs114118022      | 3 | 0.7884 | 1.1631 | 0.3576 | --      | --      | --       | --      | 1.2727   | 1.2028   | 0.49605  | 0.30366 | 7.5272  | 1.4709   | 0.10729  | 0.30855 | --      | --      | --      | --      | 0.74136 | 0.67911  | 0.31766  | 0.37824 |
| 6 | 138394030 | rs75199414       | 4 | 0.8061 | 1.0086 | 0.816  | 1.0828  | 0.14573 | 0.899    | 0.98785 | 0.98549  | 0.066505 | 0.77295  | 0.9612  | 1.09    | 0.1068   | 0.55691  | 0.99219 | --      | --      | --      | --      | 0.99787 | 0.046767 | 0.4317   | 0.98814 |
| 6 | 138394220 | rs143800698      | 3 | 0.8933 | 1.0219 | 0.6865 | --      | --      | --       | --      | 1.2422   | 0.30673  | 0.31262  | 0.69444 | 0.71253 | 0.67977  | 0.33293  | 0.64286 | --      | --      | --      | --      | 0.97131 | 0.1981   | 0.81831  | 0.73966 |
| 6 | 138394287 | rs184145278      | 4 | 0.9817 | 1.008  | 0.3897 | 0.11093 | 1.6233  | 0.20672  | 0.44276 | 1.9019   | 0.69551  | 0.083824 | 0.52065 | 0.41243 | 1.5568   | 0.041584 | 0.37942 | --      | --      | --      | --      | 0.9897  | 0.42592  | 0.55264  | 0.55614 |
| 6 | 138394754 | rs115922703      | 3 | 0.6515 | 0.7262 | 0.5287 | --      | --      | --       | --      | 3.1873   | 1.1274   | 0.069747 | 0.51895 | --      | --       | --       | --      | 0.53579 | 1.1132  | 0.33877 | 0.54336 | 0.29553 | 0.94855  | 0.21196  | 0.45613 |
| 6 | 138395041 | rs6939289        | 5 | 0.3337 | 1.0359 | 0.5289 | 0.92375 | 0.16465 | 0.88456  | 0.98973 | 1.1226   | 0.071497 | 0.089574 | 0.98011 | 0.91242 | 0.10934  | 0.38205  | 0.99346 | 0.96668 | 0.24544 | 0.67387 | 0.30835 | 1.0365  | 0.040102 | 0.42927  | 0.9922  |
| 6 | 138395283 | rs12173883       | 4 | 0.6698 | 1.0276 | 0.6088 | 1.0681  | 0.25408 | 0.6006   | 0.95855 | 0.95372  | 0.12885  | 0.69001  | 0.87129 | 0.84093 | 0.20504  | 0.43524  | 0.9805  | --      | --      | --      | --      | 1.0904  | 0.082762 | 0.6484   | 0.9683  |
| 6 | 138395408 | rs673258         | 4 | 0.3655 | 1.0556 | 0.3843 | 0.92944 | 0.24457 | 0.48383  | 0.9071  | 1.0794   | 0.11536  | 0.51421  | 0.88142 | 1.4172  | 0.19117  | 0.097396 | 0.97003 | --      | --      | --      | --      | 1.0078  | 0.076666 | 0.32187  | 0.97801 |
| 6 | 138395555 | rs674111         | 4 | 0.4256 | 1.0594 | 0.268  | 0.8685  | 0.22296 | 0.28645  | 0.99443 | 1.0596   | 0.11355  | 0.60566  | 0.8392  | 1.447   | 0.18613  | 0.070641 | 0.98055 | --      | --      | --      | --      | 1.0123  | 0.074389 | 0.24502  | 0.9892  |
| 6 | 138395577 | rs149541915      | 4 | 0.945  | 0.9856 | 0.9343 | 0.7448  | 0.88507 | 0.68583  | 0.71691 | 0.97372  | 0.45423  | 0.94292  | 0.57767 | 0.75883 | 0.49227  | 0.48864  | 0.78373 | --      | --      | --      | --      | 1.1134  | 0.28564  | 0.53828  | 0.68462 |
| 6 | 138395582 | rs182473121      | 3 | 0.7223 | 0.8458 | 0.9009 | --      | --      | --       | --      | 0.71015  | 0.82317  | 0.1719   | 0.30978 | 0.61912 | 1.6107   | 0.21005  | 0.53089 | --      | --      | --      | --      | 0.97606 | 0.61551  | 0.55357  | 0.33935 |
| 6 | 138395835 | rs675435         | 4 | 0.3833 | 1.0526 | 0.4165 | 0.92944 | 0.2446  | 0.4838   | 0.9069  | 1.0785   | 0.11507  | 0.51978  | 0.87732 | 1.3985  | 0.1913   | 0.10882  | 0.96744 | --      | --      | --      | --      | 1.007   | 0.076687 | 0.32757  | 0.97676 |
| 6 | 138395983 | rs34769554       | 4 | 0.21   | 0.9508 | 0.6383 | 0.94064 | 0.17523 | 0.66885  | 0.98953 | 0.93529  | 0.080997 | 0.37515  | 0.92269 | 1.1095  | 0.25229  | 0.50359  | 0.9932  | --      | --      | --      | --      | 0.93305 | 0.052032 | 0.30231  | 0.99082 |
| 6 | 138395984 | rs60736659       | 4 | 0.6858 | 0.8599 | 0.4568 | 1.4676  | 2.318   | 0.4111   | 0.33496 | 2.2331   | 0.76344  | 0.01042  | 0.38889 | --      | --       | --       | --      | 1.0374  | 0.91003 | 0.90876 | 0.36992 | 0.53119 | 0.49531  | 0.062212 | 0.48089 |
| 6 | 138396175 | rs687271         | 4 | 0.2682 | 1.068  | 0.2159 | 0.86851 | 0.223   | 0.2864   | 0.99402 | 1.142387 | 0.1027   | 0.22918  | 1       | 1.4467  | 0.18622  | 0.070589 | 0.97963 | --      | --      | --      | --      | 1.0122  | 0.074429 | 0.24593  | 0.98837 |
| 6 | 138396348 | rs185960593      | 5 | 0.7216 | 1.0769 | 0.8923 | 1.8441  | 1.3263  | 0.24747  | 0.69945 | 1.356    | 0.47113  | 0.38267  | 0.7529  | 1.1407  | 0.64337  | 0.81646  | 0.7458  | 1.7866  | 0.84191 | 0.15543 | 0.5178  | 0.92291 | 0.26497  | 0.99446  | 0.84575 |
| 6 | 138396531 | rs146822273      | 5 | 0.7499 | 1.0366 | 0.8198 | 1.3889  | 0.60876 | 0.24187  | 0.45931 | 0.97896  | 0.20535  | 0.8939   | 0.69266 | 1.3675  | 0.31714  | 0.16538  | 0.69529 | 0.66479 | 0.67776 | 0.11414 | 0.34589 | 1.0055  | 0.15807  | 0.8197   | 0.64286 |
| 6 | 138396601 | rs184002070      | 3 | 0.848  | 1.1386 | 0.8642 | 1.7524  | 2.5708  | 0.46715  | 0.42668 | --       | --       | --       | --      | 0.56029 | 1.4981   | 0.30266  | 0.49336 | --      | --      | --      | --      | 1.3341  | 0.79486  | 0.11145  | 0.51067 |
| 6 | 138396768 | rs143358815      | 2 | 0.4224 | 1.2245 | 0.5612 | --      | --      | --       | --      | 1.4688   | 0.4022   | 0.01494  | 0.36699 | --      | --       | --       | --      | --      | --      | --      | --      | 1.0879  | 0.3243   | 0.64216  | 0.35421 |
| 6 | 138397172 | rs141607451      | 2 | 0.5713 | 1.7799 | 0.2329 | --      | --      | --       | --      | --       | --       | --       | --      | 8.9714  | 1.7015   | 0.085925 | 0.38995 | --      | --      | --      | --      | 0.9375  | 0.83059  | 0.98776  | 0.45976 |
| 6 | 138397237 | rs594511         | 4 | 0.4193 | 1.0627 | 0.2456 | 0.869   | 0.22312 | 0.28747  | 0.992   | 1.0575   | 0.11363  | 0.61917  | 0.83738 | 1.4638  | 0.18586  | 0.059963 | 0.97555 | --      | --      | --      | --      | 1.0129  | 0.074523 | 0.24038  | 0.98574 |
| 6 | 138397403 | rs1855600        | 5 | 0.8418 | 0.9923 | 0.344  | 0.96343 | 0.15147 | 0.70468  | 0.97739 | 1.0972   | 0.06625  | 0.12134  | 0.94834 | 0.85908 | 0.10085  | 0.12187  | 0.98592 | 0.9772  | 0.20691 | 0.73975 | 0.32764 | 0.97535 | 0.046346 | 0.85885  | 0.98478 |
| 6 | 138397522 | rs187002094      | 3 | 0.6809 | 0.7751 | 0.937  | 0.59461 | 1.1248  | 0.17484  | 0.31536 | 0.80999  | 1.0464   | 0.55941  | 0.34194 | --      | --       | --       | --      | --      | --      | --      | --      | 0.97879 | 1.0539   | 0.55399  | 0.48069 |
| 6 | 138397743 | rs139125059      | 2 | 0.9071 | 0.8835 | 0.6304 | --      | --      | --       | --      | --       | --       | --       | --      | --      | --       | --       | --      | 1.895   | 1.9084  | 0.34171 | 0.35184 | 0.62777 | 1.2772   | 0.54726  | 0.39923 |
| 6 | 138397811 | rs184424507      | 4 | 0.6174 | 1.2238 | 0.9429 | 2.9442  | 1.9682  | 3.23E-05 | 0.38543 | 1.7087   | 0.97396  | 0.093317 | 0.32481 | 1.0544  | 0.97307  | 0.93646  | 0.40456 | --      | --      | --      | --      | 1.0938  | 0.51655  | 0.83943  | 0.38926 |
| 6 | 138398062 | chr6:138398062:D | 4 | 0.8174 | 0.932  | 0.999  | 0.86984 | 1.5462  | 0.59091  | 0.30424 | 0.91815  | 0.4579   | 0.63078  | 0.40286 | 0.83562 | 1.0034   | 0.66979  | 0.36028 | --      | --      | --      | --      | 0.97559 | 0.46751  | 0.6521   | 0.3187  |
| 6 | 138398101 | chr6:138398101:D | 3 | 0.6623 | 0.7455 | 0.2977 | --      | --      | --       | --      | 3.0842   | 1.1282   | 0.06892  | 0.50537 | --      | --       | --       | --      | 0.54197 | 1.1109  | 0.33111 | 0.52487 | 0.32486 | 0.954    | 0.21639  | 0.42688 |
| 6 | 138399070 | rs7739485        | 4 | 0.8482 | 0.9189 | 0.357  | 0.68976 | 2.0243  | 0.63529  | 0.40462 | 2.5688   | 0.78051  | 0.013815 | 0.45608 | --      | --       | --       | --      | 1.2408  | 1.0396  | 0.61172 | 0.41643 | 0.46463 | 0.57647  | 1.14232  | 0.66443 |
| 6 | 138399141 | rs623804         | 4 | 0.7501 | 1.0126 | 0.2734 | 0.94087 | 0.13477 | 0.69759  | 0.98329 | 1.1184   | 0.061041 | 0.04826  | 0.93762 | 0.96983 | 0.093204 | 0.71804  | 0.98066 | --      | --      | --      | --      | 0.97671 | 0.042038 | 0.73406  | 0.98171 |
| 6 | 138399874 | chr6:138399874:D | 5 | 0.2985 | 1.0388 | 0.6608 | 0.9376  | 0.16553 | 0.81821  | 0.98399 | 1.1198   | 0.071719 | 0.098404 | 0.98534 | 0.93605 | 0.11024  | 0.53386  | 0.99056 | 0.994   | 0.24646 | 0.9346  | 0.31097 | 1.0349  | 0.049002 | 0.43985  | 0.98866 |
| 6 | 138399910 | rs56197250       | 5 | 0.7444 | 0.9653 | 0.7262 | 0.57019 | 0.50896 | 0.20742  | 0.72072 | 1.115    | 0.2      |          |         |         |          |          |         |         |         |         |         |         |          |          |         |

|   |           |                  |   |        |        |        |         |         |         |         |         |          |          |         |          |          |          |         |         |         |         |         |         |          |          |         |
|---|-----------|------------------|---|--------|--------|--------|---------|---------|---------|---------|---------|----------|----------|---------|----------|----------|----------|---------|---------|---------|---------|---------|---------|----------|----------|---------|
| 6 | 138407369 | rs191108998      | 4 | 0.7872 | 1.1012 | 0.9874 | 1.3957  | 2.4183  | 0.66984 | 0.31941 | 0.95167 | 0.70142  | 0.91596  | 0.69613 | --       | --       | --       | --      | 0.73109 | 1.7706  | 0.61145 | 0.34247 | 1.1842  | 0.43353  | 0.6536   | 0.73187 |
| 6 | 138407431 | rs1091226        | 4 | 0.6222 | 1.0288 | 0.4262 | 0.90672 | 0.22575 | 0.37974 | 0.87458 | 1.0562  | 0.11438  | 0.59745  | 0.76044 | 1.3514   | 0.18747  | 0.081763 | 0.85405 | --      | --      | --      | --      | 0.98722 | 0.075215 | 0.54359  | 0.8814  |
| 6 | 138407433 | chr6:138407433:D | 4 | 0.939  | 1.0037 | 0.8688 | 1.0193  | 0.21779 | 0.55635 | 0.52605 | 0.96302 | 0.09351  | 0.47947  | 0.54817 | 0.92754  | 0.14843  | 0.36659  | 0.55758 | --      | --      | --      | --      | 1.0354  | 0.063099 | 0.85257  | 0.56051 |
| 6 | 138407524 | rs149376374      | 2 | 0.9007 | 0.938  | 0.9571 | --      | --      | --      | --      | 0.90436 | 0.85048  | 0.76573  | 0.36929 | --       | --       | --       | --      | --      | --      | --      | --      | 0.55777 | 0.64268  | 0.5348   | 0.33933 |
| 6 | 138407688 | rs184374287      | 3 | 0.8752 | 1.1008 | 0.9769 | 1.4705  | 2.6138  | 0.27889 | 0.366   | 1.1326  | 0.67521  | 0.68175  | 0.4479  | --       | --       | --       | --      | 0.80604 | 1.7234  | 0.70326 | 0.34985 | --      | --       | --       | --      |
| 6 | 138408047 | rs80163205       | 3 | 0.6533 | 1.2443 | 0.6802 | --      | --      | --      | --      | 1.8361  | 0.7958   | 0.037638 | 0.35033 | --       | --       | --       | --      | 1.8324  | 1.1682  | 0.18258 | 0.40438 | 0.77792 | 0.72318  | 0.58797  | 0.42852 |
| 6 | 138408218 | rs181346358      | 3 | 0.4021 | 1.3438 | 0.8619 | --      | --      | --      | --      | 1.5707  | 1.7315   | 0.44015  | 0.33674 | 2.3453   | 1.1093   | 0.26738  | 0.49619 | --      | --      | --      | --      | 1.2489  | 0.38087  | 0.2609   | 0.62045 |
| 6 | 138408248 | rs184988562      | 2 | 0.9502 | 1.0303 | 0.7132 | --      | --      | --      | --      | 0.75615 | 0.96753  | 0.34562  | 0.31268 | --       | --       | --       | --      | --      | --      | --      | --      | 1.1382  | 0.5491   | 0.873    | 0.41931 |
| 6 | 138408379 | rs18906726       | 5 | 0.5871 | 0.8168 | 0.572  | 1.947   | 2.2473  | 0.0447  | 0.56111 | 1.4562  | 0.60313  | 0.41262  | 0.80416 | 2.7457   | 2.1468   | 0.54728  | 0.68331 | 1.7912  | 1.8626  | 0.38817 | 0.36529 | 0.44814 | 0.51644  | 0.050274 | 0.73735 |
| 6 | 138408394 | rs181724202      | 2 | 0.9082 | 0.84   | 0.4991 | 2.1607  | 2.0594  | 0.84566 | 0.67073 | --      | --       | --       | --      | --       | --       | --       | --      | --      | --      | --      | --      | 0.27805 | 2.2277   | 0.57765  | 0.62957 |
| 6 | 138408462 | rs12111282       | 4 | 0.1751 | 0.9461 | 0.6341 | 0.95184 | 0.17808 | 0.72623 | 0.9604  | 0.92299 | 0.081853 | 0.28081  | 0.89754 | 1.1067   | 0.12744  | 0.50007  | 0.95351 | --      | --      | --      | --      | 0.92986 | 0.052994 | 0.27531  | 0.95317 |
| 6 | 138408573 | rs189506848      | 2 | 0.9487 | 1.0313 | 0.711  | --      | --      | --      | --      | 0.755   | 0.96798  | 0.34342  | 0.3127  | --       | --       | --       | --      | --      | --      | --      | --      | 1.1106  | 0.55022  | 0.86434  | 0.4187  |
| 6 | 138408768 | rs34375712       | 4 | 0.1494 | 0.9431 | 0.5954 | 0.92426 | 0.17792 | 0.58477 | 0.9462  | 0.91349 | 0.080727 | 0.2132   | 0.88028 | 1.1121   | 0.12781  | 0.49167  | 0.93671 | --      | --      | --      | --      | 0.93133 | 0.052803 | 0.31279  | 0.94255 |
| 6 | 138408855 | rs75669930       | 3 | 0.7028 | 1.2032 | 0.6042 | --      | --      | --      | --      | 1.9169  | 0.80008  | 0.031961 | 0.36095 | --       | --       | --       | --      | 1.8196  | 1.1672  | 0.19141 | 0.40812 | 0.71059 | 0.71461  | 0.45393  | 0.44248 |
| 6 | 138408916 | rs668832         | 4 | 0.4703 | 1.0443 | 0.3836 | 0.89013 | 0.22833 | 0.33455 | 0.95314 | 1.0577  | 0.11544  | 0.61388  | 0.82264 | 1.4005   | 0.19225  | 0.086281 | 0.91929 | --      | --      | --      | --      | 1.0069  | 0.077636 | 0.25537  | 0.9279  |
| 6 | 138409297 | rs77370127       | 3 | 0.9673 | 0.9813 | 0.7511 | --      | --      | --      | --      | 1.4387  | 0.83471  | 0.16589  | 0.30694 | --       | --       | --       | --      | 1.3827  | 1.126   | 0.39219 | 0.34947 | 0.70625 | 0.63346  | 0.35527  | 0.4472  |
| 6 | 138409379 | rs681144         | 4 | 0.6821 | 1.0129 | 0.6504 | 1.154   | 0.13362 | 0.53234 | 0.91316 | 1.028   | 0.059851 | 0.65299  | 0.89818 | 1.0575   | 0.098535 | 0.67478  | 0.91561 | --      | --      | --      | --      | 0.98544 | 0.041674 | 0.12381  | 0.92886 |
| 6 | 138409551 | rs187559691      | 5 | 0.9669 | 0.9871 | 0.9227 | 0.78911 | 0.86429 | 0.62416 | 0.50919 | 0.80934 | 0.76565  | 0.3508   | 0.36391 | 0.61642  | 0.92476  | 0.25395  | 0.52758 | 2.2516  | 1.246   | 0.2947  | 0.66655 | 1.1165  | 0.4328   | 0.4109   | 0.45488 |
| 6 | 138409767 | rs9759           | 4 | 0.8872 | 1.0053 | 0.3167 | 1.1559  | 0.13778 | 0.7934  | 1       | 1.0529  | 0.060345 | 0.42375  | 1       | 1.0462   | 0.098958 | 0.74111  | 1       | --      | --      | --      | --      | 0.9489  | 0.042945 | 0.066674 | 1       |
| 6 | 138410050 | rs548579         | 4 | 0.9232 | 1.0037 | 0.3017 | 1.1436  | 0.13963 | 0.7901  | 0.93117 | 1.0358  | 0.061103 | 0.57783  | 0.94499 | 1.0894   | 0.10137  | 0.42699  | 0.9424  | --      | --      | --      | --      | 0.94477 | 0.043379 | 0.06117  | 0.94371 |
| 6 | 138410106 | rs3822942        | 4 | 0.7147 | 1.0239 | 0.7607 | 1.1228  | 0.26238 | 0.46587 | 0.83928 | 0.95181 | 0.12727  | 0.63513  | 0.78951 | 0.89505  | 0.2061   | 0.598    | 0.86982 | --      | --      | --      | --      | 1.0718  | 0.08483  | 0.70696  | 0.87273 |
| 6 | 138410112 | rs3822943        | 4 | 0.3997 | 1.0331 | 0.7029 | 0.96116 | 0.17342 | 0.71104 | 0.93082 | 1.1042  | 0.075474 | 0.14453  | 0.92086 | 0.95933  | 0.11319  | 0.65543  | 0.94227 | --      | --      | --      | --      | 1.0237  | 0.05125  | 0.44796  | 0.93099 |
| 6 | 138410348 | rs74451033       | 4 | 0.8991 | 0.991  | 0.8459 | 0.94197 | 0.27112 | 0.43102 | 0.88025 | 1.0217  | 0.1356   | 0.89558  | 0.80576 | 1.1842   | 0.23566  | 0.46402  | 0.87349 | --      | --      | --      | --      | 0.95423 | 0.095148 | 0.45611  | 0.88366 |
| 6 | 138410766 | rs189355867      | 2 | 0.4324 | 0.3667 | 0.8208 | --      | --      | --      | --      | --      | --       | --       | 0.25811 | 2.0087   | 0.35027  | 0.67012  | --      | --      | --      | --      | 0.46554 | 1.6559  | 0.46814  | 0.32627  |         |
| 6 | 138411078 | rs78126136       | 4 | 0.5177 | 0.8901 | 0.9797 | 0.88278 | 1.0324  | 0.73406 | 0.43486 | 0.98088 | 0.32551  | 0.91061  | 0.49974 | 0.96085  | 0.55126  | 0.83814  | 0.62021 | --      | --      | --      | --      | 0.83196 | 0.24115  | 0.35292  | 0.55365 |
| 6 | 138411399 | rs147859766      | 4 | 0.95   | 1.0255 | 0.8368 | 0.2362  | 1.6764  | 0.25842 | 0.36662 | --      | --       | --       | 1.3479  | 1.1977   | 0.69888  | 0.61094  | 1.2405  | 1.2218  | 0.66394 | 0.43782 | 1.0733  | 0.47213 | 0.44328  | 0.78333  |         |
| 6 | 138411443 | rs619881         | 4 | 0.2844 | 0.9348 | 0.712  | 1.1674  | 0.28604 | 0.55606 | 0.6557  | 0.98067 | 0.10499  | 0.77386  | 1       | 0.9743   | 0.2024   | 0.75013  | 0.74068 | --      | --      | --      | --      | 0.87649 | 0.089397 | 0.059424 | 0.72409 |
| 6 | 138411514 | rs514552         | 4 | 0.4782 | 1.0215 | 0.8486 | 0.97666 | 0.13192 | 0.96477 | 0.8543  | 1.0259  | 0.057089 | 0.60944  | 0.89351 | 0.95575  | 0.090386 | 0.63765  | 0.8984  | --      | --      | --      | --      | 1.0369  | 0.039934 | 0.24032  | 0.88673 |
| 6 | 138411523 | rs116525343      | 2 | 0.5269 | 0.7302 | 0.996  | --      | --      | --      | --      | 0.72894 | 0.60422  | 0.31658  | 0.50674 | 0.73285  | 0.87373  | 0.43296  | 0.40365 | --      | --      | --      | --      | --      | --       | --       | --      |
| 6 | 138411706 | rs61076779       | 2 | 0.5341 | 0.6166 | 0.6206 | --      | --      | --      | --      | --      | --       | --       | --      | --       | --       | --       | --      | 1.1927  | 1.543   | 0.77369 | 0.41429 | 0.49263 | 0.90019  | 0.093703 | 0.31334 |
| 6 | 138411813 | chr6:138411813:D | 5 | 0.8407 | 0.9921 | 0.8627 | 1.1076  | 0.17334 | 0.63858 | 0.78229 | 1.042   | 0.078062 | 0.56159  | 0.82382 | 1.0101   | 0.11677  | 0.92461  | 0.87703 | 0.98405 | 0.24013 | 0.81836 | 0.32894 | 0.95668 | 0.053101 | 0.43524  | 0.86723 |
| 6 | 138411861 | rs182754206      | 2 | 0.3106 | 0.4571 | 0.9077 | --      | --      | --      | --      | 0.37533 | 1.8665   | 0.22188  | 0.40366 | 0.47609  | 0.84801  | 0.19891  | 0.67821 | --      | --      | --      | --      | --      | --       | --       | --      |
| 6 | 138412040 | rs35883658       | 3 | 0.7929 | 1.3082 | 0.6927 | --      | --      | --      | --      | 2.8023  | 1.3563   | 0.17541  | 0.515   | 0.43083  | 2.6092   | 0.15233  | 0.52866 | --      | --      | --      | --      | 0.50767 | 1.942    | 0.53808  | 0.32302 |
| 6 | 138412070 | rs8155           | 4 | 0.6388 | 1.0256 | 0.1684 | 0.8325  | 0.17833 | 0.35859 | 0.73477 | 0.99579 | 0.068231 | 0.96887  | 0.9221  | 0.95444  | 0.10916  | 0.78798  | 0.95979 | --      | --      | --      | --      | 1.1227  | 0.047366 | 0.003592 | 0.96096 |
| 6 | 138412313 | rs6588           | 4 | 0.5344 | 1.0195 | 0.8468 | 0.92493 | 0.13958 | 0.49738 | 0.79538 | 1.0073  | 0.059526 | 0.93473  | 0.89179 | 0.99365  | 0.096027 | 0.95235  | 0.93053 | --      | --      | --      | --      | 1.039   | 0.041135 | 0.11494  | 0.91835 |
| 6 | 138412320 | chr6:138412320:D | 5 | 0.4414 | 1.0588 | 0.2441 | 1.273   | 0.25188 | 0.3542  | 0.69692 | 1.1666  | 0.10733  | 0.11058  | 0.85124 | 1.2309   | 0.1673   | 0.20505  | 0.85425 | 0.8908  | 0.32097 | 0.34176 | 0.41349 | 0.92401 | 0.07569  | 0.31392  | 0.8368  |
| 6 | 138412612 | rs8085           | 4 | 0.0931 | 1.0499 | 0.9642 | 1.0039  | 0.12816 | 0.97929 | 0.92829 | 1.0681  | 0.054269 | 0.23479  | 1       | 1.0281   | 0.089626 | 0.68256  | 0.959   | --      | --      | --      | --      | 1.0492  | 0.038862 | 0.23041  | 0.95358 |
| 6 | 138412667 | rs182308008      | 3 | 0.8243 | 0.8953 | 0.8867 | 0.84353 | 2.1039  | 0.93944 | 0.44543 | 1.2858  | 0.89414  | 0.37146  | 0.32401 | 0.075361 | 0.6262   | 0.42441  | 0.65117 | --      | --      | --      | --      | --      | --       | --       | --      |
| 6 | 138412798 | rs481438         | 4 | 0.3975 | 1.0425 | 0.1757 | 1.2     | 0.15074 | 0.24977 | 0.76891 | 1.0941  | 0.063165 | 0.14159  | 0.94871 | 1.0948   | 0.10155  | 0.40897  | 0.94004 | --      | --      | --      | --      | 0.95603 | 0.045052 | 0.11041  | 0.93269 |
| 6 | 138412888 | rs11557031       | 5 | 0.5367 | 1.0413 | 0.3268 | 1.1405  | 0.24802 | 0.85821 | 0.70332 | 1.1642  | 0.1074   | 0.10952  | 0.84538 | 1.2249   | 0.16827  | 0.23511  | 0.86211 | 0.90244 | 0.37243 | 0.36137 | 0.32605 | 0.92573 | 0.075789 | 0.32746  | 0.85067 |
| 6 | 138413240 | rs75183345       | 2 | 0.5301 | 0.4669 | 0.4164 | --      | --      | --      | --      | --      | --       | --       | 0.11782 | 2.084    | 0.16811  | 0.74041  | --      | --      | --      | --      | 0.94588 | 1.4924  | 0.80631  | 0.30882  |         |
| 6 | 138413269 | rs648396         | 4 | 0.4146 | 1.0238 | 0.9949 | 0.99729 | 0.12217 | 0.93075 | 0.98908 | 1.0257  | 0.055291 | 0.66649  | 0.96124 | 1.0124   | 0.088395 | 0.82504  | 0.99492 | --      | --      | --      | --      | 1.0276  | 0.038212 | 0.43288  | 0.99349 |
| 6 | 138413282 | rs184280101      | 2 | 0.8232 | 0.7567 | 0.933  | --      | --      | --      | --      | --      | --       | --       | 0.86225 | 1.9918   | 0.77479  | 0.64385  | --      | --      | --      | --      | 0.69555 | 1.6009  | 0.78703  | 0.34191  |         |
| 6 | 138413333 | rs648802         | 4 | 0.4154 | 1.0237 | 0.9348 | 0.9971  | 0.12207 | 0.9298  | 0.98997 | 1.0254  | 0.055307 | 0.66918  | 0.96073 | 1.0123   | 0.088343 | 0.82558  | 0.99617 | --      | --      | --      | --      | 1.0277  | 0.038189 | 0.43221  | 0.9949  |
| 6 | 138413496 | rs56962605       | 2 | 0.5934 | 0.6297 | 0.3501 | --      | --      | --      | --      | --      | --       | --       | --      | --       | --       | --       | --      | 3.6275  | 2.0644  | 0.15397 | 0.43864 | 0.43322 | 0.95413  | 0.090176 | 0.35113 |
| 6 | 138413610 | rs563495         | 4 | 0.3916 | 1.0249 | 0.9948 | 0.99844 | 0.12185 | 0.94255 | 0.9918  | 1.0272  | 0.055329 | 0.64567  | 0.95857 | 1.013    |          |          |         |         |         |         |         |         |          |          |         |



|   |           |                  |   |         |        |        |         |         |          |         |          |          |           |         |         |          |         |         |         |         |         |         |         |          |          |         |
|---|-----------|------------------|---|---------|--------|--------|---------|---------|----------|---------|----------|----------|-----------|---------|---------|----------|---------|---------|---------|---------|---------|---------|---------|----------|----------|---------|
| 6 | 138417080 | rs2506843        | 5 | 0.9278  | 0.9973 | 0.8251 | 0.91662 | 0.14756 | 0.61199  | 0.66023 | 0.9804   | 0.059606 | 0.72004   | 0.81937 | 0.92933 | 0.089047 | 0.46174 | 0.96247 | 1.0002  | 0.18291 | 0.97572 | 0.37177 | 1.0245  | 0.039198 | 0.36044  | 0.94858 |
| 6 | 138417118 | rs2484066        | 5 | 0.6649  | 0.9873 | 0.8201 | 0.86796 | 0.15245 | 0.30318  | 0.64358 | 0.98809  | 0.060386 | 0.83465   | 0.79306 | 0.92564 | 0.087039 | 0.44549 | 1       | 1.0013  | 0.20293 | 0.94255 | 0.31635 | 1.0071  | 0.038295 | 0.61921  | 1       |
| 6 | 138417301 | rs4896313        | 4 | 0.9604  | 0.998  | 0.8761 | 1.0386  | 0.1926  | 0.59513  | 0.70057 | 1.0245   | 0.073315 | 0.71271   | 1       | 0.91151 | 0.12608  | 0.36365 | 0.82047 | --      | --      | --      | --      | 0.99717 | 0.055801 | 0.49288  | 0.80594 |
| 6 | 138417319 | rs6903898        | 4 | 0.9077  | 0.9931 | 0.2253 | 1.1091  | 0.22788 | 0.45796  | 0.6798  | 1.0073   | 0.082535 | 0.8772    | 1       | 1.1797  | 0.12576  | 0.16086 | 0.8503  | --      | --      | --      | --      | 0.90468 | 0.059299 | 0.029995 | 0.82265 |
| 6 | 138417408 | rs76259604       | 5 | 0.9667  | 0.9969 | 0.4546 | 1.1637  | 0.39425 | 0.62382  | 0.49748 | 1.234    | 0.1392   | 0.070807  | 0.82672 | 0.91772 | 0.19484  | 0.56076 | 0.82121 | 0.94927 | 0.40322 | 0.71442 | 0.40064 | 0.90155 | 0.10277  | 0.072751 | 0.75087 |
| 6 | 138417415 | rs2484067        | 5 | 0.4603  | 1.0229 | 0.4278 | 0.94739 | 0.14555 | 0.70995  | 0.68794 | 1.0255   | 0.059656 | 0.61997   | 0.81672 | 0.87201 | 0.094827 | 0.13566 | 0.86701 | 1.0138  | 0.20935 | 0.80299 | 0.30611 | 1.0592  | 0.040862 | 0.15301  | 0.85339 |
| 6 | 138417552 | rs61730263       | 2 | 0.4222  | 2.6498 | 0.8442 | --      | --      | --       | --      | 2.1968   | 1.5441   | 0.16004   | 0.32742 | --      | --       | --      | --      | 3.5904  | 1.9656  | 0.24184 | 0.53091 | --      | --       | --       | --      |
| 6 | 138417672 | rs80346877       | 5 | 0.7637  | 0.9655 | 0.6146 | 1.0803  | 0.68196 | 0.93832  | 0.33623 | 1.2992   | 0.22057  | 0.052584  | 0.60975 | 0.84419 | 0.2897   | 0.31663 | 0.69534 | 0.9506  | 0.60357 | 0.78103 | 0.30828 | 0.84702 | 0.16687  | 0.10883  | 0.55655 |
| 6 | 138418015 | rs9494937        | 5 | 0.428   | 0.9765 | 0.3942 | 1.0894  | 0.12884 | 0.59479  | 0.93401 | 0.98293  | 0.056852 | 0.75672   | 1       | 1.1123  | 0.089772 | 0.35373 | 0.95201 | 1.0101  | 0.16337 | 0.93765 | 0.50112 | 0.93481 | 0.039669 | 0.11566  | 0.94758 |
| 6 | 138418176 | chr6:138418176:D | 5 | 0.8368  | 1.0082 | 0.2757 | 1.1568  | 0.13973 | 0.33411  | 0.87146 | 0.99174  | 0.061333 | 0.87877   | 0.93229 | 1.1738  | 0.097339 | 0.12915 | 0.92171 | 0.9813  | 0.16001 | 0.80853 | 0.63193 | 0.95311 | 0.041777 | 0.31675  | 0.91011 |
| 6 | 138418382 | rs9494938        | 5 | 0.5494  | 0.9814 | 0.3749 | 1.1186  | 0.12796 | 0.46667  | 0.937   | 0.97671  | 0.057628 | 0.66239   | 0.96826 | 1.1124  | 0.089778 | 0.35592 | 0.95419 | 1.0194  | 0.16369 | 0.8516  | 0.50067 | 0.93984 | 0.039534 | 0.15066  | 0.94806 |
| 6 | 138418610 | chr6:138418610:D | 3 | 0.7863  | 1.0605 | 0.9882 | --      | --      | --       | --      | 1.0488   | 0.38167  | 0.75671   | 0.43708 | 1.1838  | 0.7456   | 0.69715 | 0.44784 | --      | --      | --      | --      | 1.0503  | 0.28096  | 0.84701  | 0.48768 |
| 6 | 138418781 | rs185332894      | 3 | 0.6902  | 1.2893 | 0.9716 | --      | --      | --       | --      | 1.4451   | 1.3492   | 0.37732   | 0.31268 | 0.94058 | 1.4733   | 0.7032  | 0.34063 | --      | --      | --      | --      | 1.3648  | 0.83016  | 0.4334   | 0.37932 |
| 6 | 138418910 | rs188649212      | 3 | 0.3077  | 1.4806 | 0.6313 | --      | --      | --       | --      | 2.3859   | 0.6289   | 0.0098012 | 0.51022 | 1.1058  | 1.2577   | 0.78502 | 0.44059 | --      | --      | --      | --      | 1.1144  | 0.52727  | 0.50828  | 0.42994 |
| 6 | 138418925 | rs192581091      | 4 | 0.9147  | 0.9784 | 0.8034 | 1.3138  | 1.1342  | 0.20773  | 0.34588 | 1.3642   | 0.44231  | 0.091492  | 0.41632 | 1.1535  | 0.72874  | 0.56831 | 0.31929 | --      | --      | --      | --      | 0.8527  | 0.24785  | 0.11135  | 0.41621 |
| 6 | 138419207 | rs2327871        | 4 | 0.4256  | 0.9747 | 0.3909 | 1.0409  | 0.15128 | 0.64917  | 0.81281 | 0.92176  | 0.064085 | 0.1589    | 0.89675 | 1.1169  | 0.095685 | 0.33491 | 0.95635 | --      | --      | --      | --      | 0.96754 | 0.041836 | 0.43847  | 0.94843 |
| 6 | 138419273 | rs145024897      | 2 | 0.9902  | 1.0039 | 0.8509 | --      | --      | --       | --      | 0.90949  | 0.61445  | 0.59385   | 0.33747 | --      | --       | --      | --      | --      | --      | --      | --      | 1.0411  | 0.3729   | 0.90372  | 0.39745 |
| 6 | 138419826 | rs188085610      | 2 | 0.5572  | 0.7318 | 0.9764 | --      | --      | --       | --      | 0.72302  | 0.66961  | 0.39535   | 0.54708 | 0.747   | 0.87617  | 0.4978  | 0.43277 | --      | --      | --      | --      | --      | --       | --       | --      |
| 6 | 138420181 | rs7905857        | 5 | 0.9919  | 0.9993 | 0.4616 | 1.1551  | 0.37224 | 0.63932  | 0.53448 | 1.2298   | 0.13445  | 0.067094  | 0.83462 | 0.91481 | 0.18378  | 0.53845 | 0.8615  | 0.92602 | 0.38492 | 0.59351 | 0.41352 | 0.91738 | 0.0954   | 0.10109  | 0.87846 |
| 6 | 138420408 | rs5996029        | 2 | 0.7524  | 1.3536 | 0.8448 | 1.0471  | 1.6254  | 0.59415  | 0.43877 | --       | --       | --        | --      | --      | --       | --      | --      | --      | --      | --      | --      | 1.5529  | 1.1889   | 0.42856  | 0.46949 |
| 6 | 138420573 | rs1556639        | 5 | 0.648   | 0.9848 | 0.3346 | 1.1109  | 0.12724 | 0.48862  | 0.95335 | 0.98016  | 0.057208 | 0.71707   | 0.9764  | 1.1182  | 0.08884  | 0.33232 | 0.96898 | 1.0167  | 0.16117 | 0.87865 | 0.52044 | 0.93629 | 0.039251 | 0.1286   | 0.96365 |
| 6 | 138421119 | rs139405357      | 3 | 0.8348  | 0.9679 | 0.9623 | --      | --      | --       | --      | 0.95767  | 0.37486  | 0.69552   | 0.34371 | 0.87334 | 0.41829  | 0.61484 | 0.56614 | --      | --      | --      | --      | 0.9911  | 0.18913  | 0.74192  | 0.53828 |
| 6 | 138421228 | rs187028277      | 3 | 0.6957  | 1.211  | 0.6954 | --      | --      | --       | --      | 1.0263   | 0.8867   | 0.94286   | 0.38596 | 0.45805 | 1.3992   | 0.17189 | 0.46188 | --      | --      | --      | --      | 1.6271  | 0.64635  | 0.069725 | 0.36837 |
| 6 | 138421231 | rs74753832       | 4 | 0.7108  | 1.0377 | 0.5267 | 1.1633  | 0.38862 | 0.79313  | 0.68399 | 1.0318   | 0.19066  | 0.91664   | 0.71526 | 1.5929  | 0.3238   | 0.1114  | 0.76035 | --      | --      | --      | --      | 0.95535 | 0.13282  | 0.48686  | 0.76191 |
| 6 | 138421677 | chr6:138421677:1 | 2 | 0.6656  | 0.89   | 0.9279 | --      | --      | --       | --      | 0.90546  | 0.32959  | 0.43143   | 0.42305 | 0.85971 | 0.46837  | 0.37587 | 0.41115 | --      | --      | --      | --      | --      | --       | --       | --      |
| 6 | 138421697 | rs9484113        | 4 | 0.4859  | 0.9547 | 0.2451 | 0.92163 | 0.26047 | 0.92078  | 0.86254 | 0.90147  | 0.098277 | 0.30374   | 0.95724 | 1.2302  | 0.14134  | 0.15356 | 0.94457 | --      | --      | --      | --      | 0.90347 | 0.067442 | 0.22924  | 0.93819 |
| 6 | 138422236 | rs34029435       | 5 | 0.5673  | 0.9812 | 0.34   | 1.1041  | 0.12752 | 0.53075  | 0.95723 | 0.97281  | 0.057302 | 0.61802   | 0.97204 | 1.1179  | 0.088853 | 0.33432 | 0.97126 | 1.017   | 0.16078 | 0.87631 | 0.52397 | 0.93516 | 0.039204 | 0.13036  | 0.96907 |
| 6 | 138422298 | rs187831229      | 5 | 0.6735  | 1.0904 | 0.9453 | 1.4414  | 1.0866  | 0.20911  | 0.39653 | 1.1818   | 0.3569   | 0.43122   | 0.58997 | 1.5371  | 0.691    | 0.43453 | 0.58507 | 1.5389  | 1.1109  | 0.29825 | 0.37852 | 0.93462 | 0.28733  | 0.73459  | 0.59463 |
| 6 | 138422331 | rs57230984       | 5 | 0.546   | 0.9811 | 0.3709 | 1.0957  | 0.12801 | 0.57923  | 0.93932 | 0.96884  | 0.057689 | 0.56199   | 0.96092 | 1.1132  | 0.08944  | 0.3506  | 0.95535 | 1.083   | 0.16553 | 0.35167 | 0.49773 | 0.94051 | 0.039495 | 0.14991  | 0.95184 |
| 6 | 138422338 | rs145562245      | 4 | 0.9603  | 1.012  | 0.9669 | 0.89814 | 1.1935  | 0.97821  | 0.61407 | 1.2348   | 0.48592  | 0.43038   | 0.55449 | 0.80815 | 0.8814   | 0.68325 | 0.70333 | --      | --      | --      | --      | 0.97001 | 0.30063  | 0.79595  | 0.75868 |
| 6 | 138422463 | rs35524498       | 5 | 0.06156 | 0.9301 | 0.6982 | 0.89237 | 0.18134 | 0.6466   | 0.90285 | 0.9      | 0.074721 | 0.16843   | 0.97622 | 1.0591  | 0.11245  | 0.66127 | 0.95532 | 1.1238  | 0.26026 | 0.1428  | 0.31341 | 0.91506 | 0.052534 | 0.12864  | 0.95781 |
| 6 | 138422496 | rs187937190      | 4 | 0.877   | 0.9626 | 0.9968 | 0.79769 | 1.033   | 0.32044  | 0.3552  | 0.9896   | 0.36901  | 0.92275   | 0.52277 | 1.0394  | 0.74875  | 0.99855 | 0.49165 | --      | --      | --      | --      | 0.93864 | 0.39307  | 0.53515  | 0.40008 |
| 6 | 138422854 | rs184510648      | 2 | 0.8791  | 0.9043 | 0.9539 | --      | --      | --       | --      | --       | --       | --        | --      | 0.99371 | 1.7604   | 0.97362 | 0.31576 | --      | --      | --      | --      | 0.89042 | 0.71321  | 0.82058  | 0.33503 |
| 6 | 138422857 | rs7773663        | 5 | 0.6346  | 0.9846 | 0.3481 | 1.1035  | 0.12697 | 0.54849  | 0.95184 | 0.9729   | 0.057194 | 0.61755   | 0.97548 | 1.117   | 0.088926 | 0.33584 | 0.96566 | 1.0664  | 0.16354 | 0.46009 | 0.50622 | 0.93984 | 0.039254 | 0.15414  | 0.96395 |
| 6 | 138423010 | rs73774623       | 2 | 0.6397  | 1.6861 | 0.941  | --      | --      | --       | --      | 1.5863   | 1.3874   | 0.33325   | 0.31144 | --      | --       | --      | --      | 1.8855  | 1.8779  | 0.41391 | 0.39699 | --      | --       | --       | --      |
| 6 | 138423053 | rs73774624       | 2 | 0.6475  | 1.6662 | 0.9233 | --      | --      | --       | --      | 1.5397   | 1.3852   | 0.35994   | 0.30716 | --      | --       | --      | --      | 1.9291  | 1.8867  | 0.40233 | 0.39989 | --      | --       | --       | --      |
| 6 | 138424372 | rs142753208      | 5 | 0.6882  | 0.9789 | 0.5009 | 1.2212  | 0.266   | 0.40397  | 0.59794 | 1.0963   | 0.1076   | 0.29995   | 0.76931 | 1.0599  | 0.1512   | 0.79227 | 0.91122 | 0.89001 | 0.2683  | 0.36568 | 0.5285  | 0.90694 | 0.071226 | 0.21228  | 0.88228 |
| 6 | 138424477 | rs147371157      | 5 | 0.6555  | 0.9771 | 0.4113 | 1.2243  | 0.26374 | 0.40783  | 0.59843 | 1.112    | 0.10643  | 0.21979   | 0.77599 | 1.0553  | 0.1487   | 0.81816 | 0.93035 | 0.91515 | 0.25603 | 0.48411 | 0.55075 | 0.89947 | 0.069477 | 0.16246  | 0.90609 |
| 6 | 138424753 | rs180746680      | 5 | 0.7419  | 1.1177 | 0.9544 | 5.368   | 2.2665  | 0.089995 | 0.5958  | 1.1188   | 0.66432  | 0.78231   | 0.56674 | 1.1419  | 0.8213   | 0.85409 | 0.59423 | 2.184   | 1.8487  | 0.09366 | 0.30406 | 0.92928 | 0.47407  | 0.56037  | 0.57985 |
| 6 | 138424986 | rs76908420       | 3 | 0.35    | 0.7536 | 0.7923 | --      | --      | --       | --      | 1.0875   | 0.65627  | 0.80425   | 0.52809 | 0.85645 | 0.93081  | 0.79246 | 0.55423 | --      | --      | --      | --      | 0.65882 | 0.36669  | 0.20696  | 0.57454 |
| 6 | 138425061 | rs75875437       | 5 | 0.9763  | 0.9979 | 0.4573 | 1.1529  | 0.37237 | 0.63581  | 0.53908 | 1.2297   | 0.13457  | 0.06697   | 0.83249 | 0.92153 | 0.18323  | 0.57013 | 0.86545 | 0.92641 | 0.38632 | 0.59406 | 0.41108 | 0.91393 | 0.09521  | 0.092373 | 0.79452 |
| 6 | 138425299 | rs9494939        | 5 | 0.651   | 0.9849 | 0.329  | 1.1039  | 0.12672 | 0.54319  | 0.95956 | 0.968148 | 0.05679  | 0.56303   | 1       | 1.1216  | 0.088589 | 0.31428 | 0.97327 | 1.0552  | 0.1638  | 0.54038 | 0.5063  | 0.93931 | 0.039079 | 0.15123  | 0.9738  |
| 6 | 138425783 | rs9484114        | 5 | 0.6101  | 0.9829 | 0.328  | 1.1148  | 0.1267  | 0.48244  | 0.97005 | 0.97313  | 0.057143 | 0.6237    | 0.97304 | 1.1168  | 0.088255 | 0.34428 | 0.98157 | 1.0061  | 0.16088 | 0.97799 | 0.52624 | 0.93594 | 0.038974 | 0.1364   | 0.98158 |
| 6 | 138425859 | rs55750867       | 3 | 0.4661  | 0.8242 |        |         |         |          |         |          |          |           |         |         |          |         |         |         |         |         |         |         |          |          |         |



|   |           |                  |   |        |        |        |         |         |          |         |         |          |          |         |         |          |          |         |         |         |         |         |         |          |          |         |
|---|-----------|------------------|---|--------|--------|--------|---------|---------|----------|---------|---------|----------|----------|---------|---------|----------|----------|---------|---------|---------|---------|---------|---------|----------|----------|---------|
| 6 | 138441060 | rs4896317        | 5 | 0.9623 | 1.0014 | 0.7615 | 1.1674  | 0.13125 | 0.3607   | 0.95244 | 1.013   | 0.059793 | 0.8509   | 0.97089 | 1.0231  | 0.094811 | 0.96945  | 0.99207 | 1.0168  | 0.146   | 0.89735 | 0.65933 | 0.97566 | 0.041412 | 0.60072  | 0.99023 |
| 6 | 138441200 | rs12524997       | 5 | 0.986  | 0.9995 | 0.7634 | 1.1639  | 0.13157 | 0.34666  | 0.95889 | 1.0136  | 0.05983  | 0.84312  | 0.97191 | 1.0247  | 0.094862 | 0.98512  | 0.9932  | 0.96591 | 0.14433 | 0.69504 | 0.70603 | 0.97577 | 0.041441 | 0.61439  | 0.99024 |
| 6 | 138441386 | rs6942220        | 5 | 0.4837 | 1.0233 | 0.4874 | 1.2478  | 0.14261 | 0.19987  | 0.95504 | 1.0495  | 0.064798 | 0.4681   | 0.96936 | 1.0898  | 0.10857  | 0.95854  | 0.99492 | 0.92854 | 0.13636 | 0.54024 | 0.98011 | 0.99111 | 0.04489  | 0.95539  | 0.99161 |
| 6 | 138441452 | rs145683458      | 4 | 0.8191 | 1.0457 | 0.6101 | 0.6483  | 0.70284 | 0.36489  | 0.52133 | 1.3705  | 0.32155  | 0.15017  | 0.68539 | 0.60933 | 0.67842  | 0.1075   | 0.54934 | --      | --      | --      | --      | 1.0062  | 0.28481  | 0.62884  | 0.52333 |
| 6 | 138441656 | chr6:138441656:1 | 4 | 0.4543 | 1.1363 | 0.4409 | 0.92945 | 1.249   | 0.67173  | 0.32599 | 0.78195 | 0.36387  | 0.32609  | 0.65905 | 2.8466  | 0.73785  | 0.084676 | 0.501   | --      | --      | --      | --      | 1.1971  | 0.203    | 0.93537  | 0.67164 |
| 6 | 138441775 | rs12664519       | 5 | 0.536  | 1.0360 | 0.9029 | 1.2481  | 0.24596 | 0.15149  | 0.65702 | 1.0219  | 0.098074 | 0.75489  | 0.8192  | 1.1023  | 0.16396  | 0.61778  | 0.8857  | 0.91156 | 0.25622 | 0.48164 | 0.51965 | 1.0186  | 0.063506 | 0.8399   | 0.88839 |
| 6 | 138441941 | rs56742352       | 5 | 0.9156 | 0.959  | 0.9724 | 0.99668 | 2.6784  | 0.61952  | 0.30904 | 0.95162 | 0.6416   | 0.86512  | 0.46018 | 1.0145  | 0.88107  | 0.99143  | 0.57076 | 2.8688  | 1.6946  | 0.1387  | 0.42792 | 0.78457 | 0.67495  | 0.92744  | 0.44521 |
| 6 | 138442560 | rs72984675       | 5 | 0.4781 | 1.0236 | 0.4865 | 1.2471  | 0.14263 | 0.20173  | 0.95495 | 1.0501  | 0.064796 | 0.46279  | 0.96972 | 1.0911  | 0.10852  | 0.95009  | 0.99548 | 0.92844 | 0.13637 | 0.53977 | 0.98047 | 0.99124 | 0.044886 | 0.95587  | 0.99219 |
| 6 | 138442711 | chr6:138442711:D | 5 | 0.6487 | 1.0423 | 0.6864 | 1.3123  | 0.4848  | 0.21617  | 0.54043 | 0.84356 | 0.17374  | 0.14844  | 0.67051 | 1.1176  | 0.38371  | 0.83437  | 0.66048 | 0.95042 | 0.47462 | 0.76801 | 0.42252 | 1.1316  | 0.11744  | 0.10073  | 0.7435  |
| 6 | 138443132 | rs4895511        | 5 | 0.7639 | 0.9896 | 0.3065 | 1.1339  | 0.12627 | 0.37359  | 0.9751  | 0.97495 | 0.057297 | 0.64526  | 0.96456 | 1.1239  | 0.087878 | 0.30856  | 0.996   | 0.98711 | 0.15688 | 0.84898 | 0.54684 | 0.942   | 0.038724 | 0.19061  | 0.99451 |
| 6 | 138443435 | rs73774648       | 4 | 0.7961 | 1.1173 | 0.9074 | 0.91491 | 1.3627  | 0.29061  | 0.36704 | 1.2211  | 0.82877  | 0.64188  | 0.47756 | 0.33555 | 1.7471   | 0.15351  | 0.60415 | --      | --      | --      | --      | 1.2598  | 0.56766  | 0.61563  | 0.60617 |
| 6 | 138443794 | rs1334705        | 5 | 0.9457 | 0.9974 | 0.2461 | 1.1617  | 0.12739 | 0.26607  | 0.9492  | 0.97287 | 0.05767  | 0.61167  | 0.95068 | 1.1227  | 0.087784 | 0.31555  | 0.99716 | 1.0285  | 0.15513 | 0.77428 | 0.55421 | 0.94047 | 0.038656 | 0.17666  | 0.99642 |
| 6 | 138444004 | rs186286951      | 2 | 0.6437 | 1.4741 | 0.946  | --      | --      | --       | --      | 1.6056  | 1.5156   | 0.35104  | 0.32443 | --      | --       | --       | --      | --      | --      | --      | --      | 1.4195  | 1.0076   | 0.10544  | 0.40912 |
| 6 | 138444038 | rs62432797       | 4 | 0.189  | 0.8198 | 0.7473 | 0.62371 | 0.76891 | 0.26556  | 0.43029 | 1.1155  | 0.32339  | 0.56306  | 0.51448 | 0.76948 | 0.48402  | 0.33063  | 0.64155 | --      | --      | --      | --      | 0.75798 | 0.18833  | 0.18159  | 0.64816 |
| 6 | 138444153 | rs10457666       | 3 | 0.6523 | 1.1183 | 0.989  | 0.89977 | 1.5067  | 0.9199   | 0.32596 | --      | --       | --       | --      | 1.1398  | 0.52589  | 0.67417  | 0.66325 | --      | --      | --      | --      | 1.1208  | 0.28655  | 0.82295  | 0.58202 |
| 6 | 138444208 | chr6:138444208:D | 4 | 0.8742 | 0.9495 | 0.9959 | 0.97807 | 1.3118  | 0.35771  | 0.31265 | 1.0178  | 0.61766  | 0.99396  | 0.36108 | 0.69686 | 1.3932   | 0.25389  | 0.33418 | --      | --      | --      | --      | 0.94269 | 0.42242  | 0.82288  | 0.42039 |
| 6 | 138444268 | rs11969915       | 2 | 0.9612 | 0.9612 | 0.3366 | --      | --      | --       | --      | 2.8385  | 1.3904   | 0.15976  | 0.49928 | --      | --       | --       | --      | --      | --      | --      | --      | 0.546   | 1.0048   | 0.73707  | 0.77154 |
| 6 | 138444360 | rs10457667       | 4 | 0.7027 | 1.0146 | 0.9422 | 0.92399 | 0.20503 | 0.95573  | 0.55817 | 1.0333  | 0.089214 | 0.52647  | 0.6162  | 1.0527  | 0.10749  | 0.56163  | 1       | --      | --      | --      | --      | 1.0074  | 0.046985 | 0.98717  | 1       |
| 6 | 138444419 | rs59133092       | 4 | 0.8006 | 1.1143 | 0.9087 | 0.91515 | 1.363   | 0.2908   | 0.36692 | 1.2194  | 0.82906  | 0.64418  | 0.47699 | 0.33903 | 1.7366   | 0.15713  | 0.60391 | --      | --      | --      | --      | 1.2546  | 0.56647  | 0.61619  | 0.60289 |
| 6 | 138444633 | rs6921895        | 5 | 0.4779 | 1.0236 | 0.4829 | 1.2467  | 0.14259 | 0.20233  | 0.95533 | 1.0493  | 0.064783 | 0.47057  | 0.97014 | 1.0935  | 0.10841  | 0.57531  | 0.9976  | 0.92671 | 0.13634 | 0.52998 | 0.98147 | 0.99148 | 0.044846 | 0.96825  | 0.99427 |
| 6 | 138444638 | rs72563096       | 5 | 0.2259 | 0.9361 | 0.9272 | 0.86563 | 0.23519 | 0.62431  | 0.99158 | 0.91652 | 0.10723  | 0.42009  | 0.98577 | 0.88608 | 0.15718  | 0.42788  | 0.99385 | 1.1751  | 0.30401 | 0.09456 | 0.31124 | 0.95192 | 0.074515 | 0.46049  | 0.99161 |
| 6 | 138444671 | rs182921420      | 4 | 0.6725 | 0.9248 | 0.9668 | --      | --      | --       | --      | 1.0159  | 0.40595  | 0.93595  | 0.32615 | 0.74807 | 0.49309  | 0.276    | 0.53493 | 0.8223  | 0.97251 | 0.54228 | 0.33264 | 0.94697 | 0.23554  | 0.45278  | 0.46102 |
| 6 | 138444683 | rs73774649       | 4 | 0.8025 | 1.1132 | 0.9099 | 0.91466 | 1.3623  | 0.29017  | 0.36678 | 1.2178  | 0.82931  | 0.64618  | 0.47639 | 0.34274 | 1.7286   | 0.16098  | 0.60351 | --      | --      | --      | --      | 1.2531  | 0.5662   | 0.61497  | 0.60081 |
| 6 | 138444739 | rs72563097       | 4 | 0.1783 | 0.928  | 0.9608 | 0.87219 | 0.2358  | 0.64482  | 0.98993 | 0.91243 | 0.10752  | 0.39675  | 0.98584 | 0.8853  | 0.15731  | 0.42464  | 0.99328 | --      | --      | --      | --      | 0.95147 | 0.074597 | 0.45581  | 0.99109 |
| 6 | 138444812 | rs72563098       | 4 | 0.1787 | 0.9281 | 0.962  | 0.87239 | 0.23576 | 0.64478  | 0.98903 | 0.91249 | 0.10751  | 0.39706  | 0.98569 | 0.88621 | 0.15735  | 0.4282   | 0.9929  | --      | --      | --      | --      | 0.95131 | 0.074581 | 0.45399  | 0.99147 |
| 6 | 138444837 | rs73774651       | 2 | 0.5744 | 1.385  | 0.9579 | --      | --      | --       | --      | 1.3325  | 0.93378  | 0.58316  | 0.51831 | --      | --       | --       | --      | --      | --      | --      | --      | 1.4191  | 0.74024  | 0.29566  | 0.4722  |
| 6 | 138444930 | rs6922466        | 5 | 0.4952 | 1.0227 | 0.9849 | 1.2465  | 0.14379 | 0.18397  | 0.94274 | 1.0483  | 0.064938 | 0.47915  | 0.96793 | 1.1061  | 0.1087   | 0.5013   | 1       | 0.92172 | 0.13568 | 0.50707 | 1       | 0.98949 | 0.044868 | 0.94148  | 1       |
| 6 | 138445137 | rs80101781       | 2 | 0.6393 | 1.487  | 0.7441 | --      | --      | --       | --      | 1.3105  | 0.93082  | 0.47809  | 0.40072 | --      | --       | --       | --      | --      | 2.7204  | 2.0351  | 0.21832 | 0.40215 | --       | --       | --      |
| 6 | 138445172 | rs991047         | 5 | 0.9541 | 1.0018 | 0.766  | 1.1646  | 0.13166 | 0.3436   | 0.95777 | 1.017   | 0.060025 | 0.79502  | 0.96525 | 1.027   | 0.094872 | 0.9952   | 0.99191 | 0.96734 | 0.14463 | 0.70768 | 0.70346 | 0.97797 | 0.041467 | 0.66144  | 0.98882 |
| 6 | 138445197 | rs72984681       | 2 | 0.807  | 1.0718 | 0.7103 | --      | --      | --       | --      | 0.9143  | 0.51332  | 0.59796  | 0.33688 | --      | --       | --       | --      | --      | --      | --      | --      | 1.1493  | 0.34032  | 0.16019  | 0.36707 |
| 6 | 138445340 | rs79041683       | 5 | 0.3813 | 1.0436 | 0.96   | 1.1405  | 0.2427  | 0.42918  | 0.65042 | 1.0473  | 0.096964 | 0.54229  | 0.82314 | 1.1453  | 0.16154  | 0.45615  | 0.90355 | 0.96931 | 0.25488 | 0.7987  | 0.54796 | 1.0253  | 0.063974 | 0.76877  | 0.89395 |
| 6 | 138445463 | rs56071175       | 5 | 0.4891 | 1.023  | 0.4311 | 1.2605  | 0.14192 | 0.18717  | 0.94975 | 1.0484  | 0.064716 | 0.47847  | 0.9689  | 1.0903  | 0.10828  | 0.95966  | 0.9945  | 0.91488 | 0.13586 | 0.46668 | 0.97678 | 0.99142 | 0.04483  | 0.96564  | 0.99103 |
| 6 | 138445483 | rs147475557      | 2 | 0.6176 | 0.7858 | 0.8853 | --      | --      | --       | --      | 0.74387 | 0.61448  | 0.18591  | 0.35052 | 0.85851 | 0.78117  | 0.58924  | 0.34708 | --      | --      | --      | --      | --      | --       | --       | --      |
| 6 | 138445511 | rs139887283      | 4 | 0.7664 | 0.9833 | 1.1864 | 0.85157 | 0.19031 | 0.13527  | 0.56728 | 0.97293 | 0.07954  | 0.58984  | 0.66261 | 0.85493 | 0.11311  | 0.17837  | 0.86164 | --      | --      | --      | --      | 1.0749  | 0.048943 | 0.090208 | 0.84496 |
| 6 | 138445718 | rs78900516       | 5 | 0.6127 | 1.0472 | 0.6957 | 1.3275  | 0.48146 | 0.2106   | 0.5616  | 0.84969 | 0.17403  | 0.17306  | 0.68079 | 1.1063  | 0.38417  | 0.86354  | 0.6717  | 0.95726 | 0.48501 | 0.79136 | 0.41469 | 1.1359  | 0.11757  | 0.10049  | 0.75243 |
| 6 | 138446022 | rs2206351        | 5 | 0.8616 | 1.0054 | 0.7602 | 1.1709  | 0.13137 | 0.34065  | 0.95229 | 1.0228  | 0.060032 | 0.72319  | 0.96457 | 1.0197  | 0.095675 | 0.95029  | 0.98185 | 1.0119  | 0.147   | 0.932   | 0.65345 | 0.97873 | 0.041672 | 0.6387   | 0.98187 |
| 6 | 138446171 | rs149841551      | 4 | 0.9135 | 0.9689 | 0.5158 | 0.70606 | 1.6913  | 0.84765  | 0.51442 | 1.8459  | 0.58864  | 0.12753  | 0.67026 | 0.45095 | 0.75577  | 0.15997  | 0.77102 | --      | --      | --      | --      | 0.91218 | 0.38311  | 0.33105  | 0.6862  |
| 6 | 138446210 | rs2327875        | 5 | 0.5032 | 1.0224 | 0.4207 | 1.2745  | 0.14675 | 0.14149  | 0.91444 | 1.0449  | 0.065059 | 0.51243  | 0.96287 | 1.0979  | 0.10894  | 0.54374  | 0.99051 | 0.92019 | 0.13645 | 0.49793 | 0.98863 | 0.99026 | 0.045082 | 0.97421  | 0.98672 |
| 6 | 138446228 | rs2876387        | 5 | 0.9766 | 1.0025 | 0.7061 | 1.1781  | 0.38204 | 0.72254  | 0.60494 | 1.008   | 0.16632  | 0.97524  | 0.65683 | 1.4054  | 0.27517  | 0.17518  | 0.78648 | 1.0453  | 0.4509  | 0.84167 | 0.41035 | 0.92278 | 0.11429  | 0.86091  | 0.79998 |
| 6 | 138446279 | rs2327876        | 5 | 0.5004 | 1.0225 | 0.4107 | 1.2763  | 0.14654 | 0.13849  | 0.91563 | 1.0454  | 0.064982 | 0.50717  | 0.96453 | 1.0979  | 0.10881  | 0.5442   | 0.99184 | 0.91763 | 0.13617 | 0.48474 | 0.99108 | 0.99044 | 0.045016 | 0.97813  | 0.98846 |
| 6 | 138446289 | rs2206350        | 5 | 0.2206 | 0.9354 | 0.9279 | 0.86342 | 0.23518 | 0.62134  | 0.99001 | 0.91949 | 0.10729  | 0.43872  | 0.9855  | 0.88451 | 0.15718  | 0.42146  | 0.99295 | 1.1766  | 0.30458 | 0.09192 | 0.31069 | 0.94967 | 0.074478 | 0.42337  | 0.98805 |
| 6 | 138446511 | rs72984683       | 5 | 0.6664 | 1.0387 | 0.6023 | 1.5262  | 0.46537 | 0.049307 | 0.51182 | 0.83526 | 0.17221  | 0.092062 | 0.61462 | 1.1647  | 0.3642   | 0.62763  | 0.56793 | 0.96152 | 0.46636 | 0.79592 | 0.39326 | 1.108   | 0.11292  | 0.17235  | 0.66304 |
| 6 | 138446557 | rs112021110      | 5 | 0.2607 | 1.0484 | 0.8133 | 1.2196  | 0.12018 | 0.18306  | 0.67366 | 0.98485 | 0.0      |          |         |         |          |          |         |         |         |         |         |         |          |          |         |

|   |           |                  |   |        |        |        |         |         |          |         |          |          |          |         |         |          |          |         |         |         |         |         |         |          |          |         |
|---|-----------|------------------|---|--------|--------|--------|---------|---------|----------|---------|----------|----------|----------|---------|---------|----------|----------|---------|---------|---------|---------|---------|---------|----------|----------|---------|
| 6 | 138451229 | rs6927691        | 4 | 0.6836 | 0.9674 | 0.1352 | 1.0099  | 0.28743 | 0.71071  | 0.79545 | 0.88268  | 0.10216  | 0.20696  | 0.90336 | 1.2632  | 0.13865  | 0.11007  | 0.96509 | --      | --      | --      | --      | 0.8933  | 0.067109 | 0.13788  | 0.95529 |
| 6 | 138451274 | rs4896318        | 5 | 0.7957 | 1.0077 | 0.9687 | 1.0801  | 0.12794 | 0.64319  | 0.98376 | 0.99756  | 0.058103 | 0.95041  | 0.98467 | 1.035   | 0.091298 | 0.83795  | 1       | 0.95463 | 0.14943 | 0.5885  | 0.6402  | 1.0044  | 0.040389 | 0.86959  | 1       |
| 6 | 138451284 | rs192317937      | 2 | 0.8315 | 0.8855 | 0.6159 | --      | --      | --       | --      | 1.1995   | 0.83226  | 0.69102  | 0.45143 | --      | --       | --       | --      | --      | --      | --      | --      | 0.67541 | 0.78611  | 0.39744  | 0.42215 |
| 6 | 138451300 | rs78780929       | 5 | 0.9687 | 1.0018 | 0.8568 | 0.98279 | 0.21491 | 0.67688  | 0.69428 | 1.0814   | 0.092133 | 0.30885  | 0.80851 | 1.0512  | 0.13066  | 0.68638  | 0.98051 | 0.90481 | 0.26486 | 0.34475 | 0.43015 | 0.96761 | 0.058982 | 0.71611  | 0.97297 |
| 6 | 138451840 | rs76640076       | 5 | 0.9488 | 1.0029 | 0.8775 | 0.99123 | 0.21688 | 0.72374  | 0.68541 | 1.0797   | 0.092931 | 0.31754  | 0.80188 | 1.0497  | 0.1325   | 0.70049  | 0.96573 | 0.91052 | 0.26779 | 0.37203 | 0.42311 | 0.96969 | 0.059394 | 0.71791  | 0.96633 |
| 6 | 138451921 | rs188257165      | 2 | 0.958  | 0.9567 | 0.9183 | --      | --      | --       | --      | --       | --       | --       | 0.86403 | 1.3019  | 0.69442  | 0.43858  | --      | --      | --      | --      | 1.0292  | 1.103   | 0.44835  | 0.31752  |         |
| 6 | 138452044 | rs117529551      | 2 | 0.4864 | 0.8327 | 0.8277 | --      | --      | --       | --      | 0.76479  | 0.47107  | 0.1251   | 0.36058 | --      | --       | --       | --      | --      | --      | --      | --      | 0.86542 | 0.31714  | 0.25065  | 0.35812 |
| 6 | 138452179 | rs9484116        | 4 | 0.6836 | 0.9674 | 0.1352 | 1.0099  | 0.28743 | 0.7107   | 0.79545 | 0.88269  | 0.10216  | 0.207    | 0.90334 | 1.2632  | 0.13865  | 0.11007  | 0.96508 | --      | --      | --      | --      | 0.8933  | 0.06711  | 0.13788  | 0.95528 |
| 6 | 138452450 | rs117101815      | 5 | 0.4893 | 0.9527 | 0.426  | 1.3041  | 0.394   | 0.23662  | 0.55266 | 1.1632   | 0.1401   | 0.18635  | 0.81358 | 0.92616 | 0.18582  | 0.58787  | 0.87825 | 0.79074 | 0.35566 | 0.184   | 0.49586 | 0.87056 | 0.095468 | 0.050575 | 0.83136 |
| 6 | 138452476 | rs4896319        | 5 | 0.7331 | 1.0102 | 0.9851 | 1.0748  | 0.1266  | 0.66598  | 0.99812 | 1.0984   | 0.057671 | 0.96216  | 0.99524 | 1.0348  | 0.10304  | 0.83961  | 0.99959 | 1.0034  | 0.1504  | 0.99184 | 0.61687 | 1.0053  | 0.040414 | 0.85465  | 0.99834 |
| 6 | 138452823 | rs146605604      | 4 | 0.7634 | 1.0957 | 0.9809 | 0.7958  | 1.0098  | 1.4524   | 0.30406 | 1.1462   | 0.57679  | 0.5773   | 0.40472 | 0.82168 | 1.2639   | 0.66155  | 0.37167 | --      | --      | --      | --      | 1.1604  | 0.40033  | 0.58928  | 0.50223 |
| 6 | 138452885 | rs95859034       | 2 | 0.6506 | 1.4879 | 0.7648 | --      | --      | --       | --      | 1.3096   | 0.97565  | 0.46078  | 0.36923 | --      | --       | --       | --      | 2.5532  | 2.0067  | 0.28313 | 0.43095 | --      | --       | --       | --      |
| 6 | 138453052 | rs9402943        | 5 | 0.933  | 1.0039 | 0.9097 | 0.97193 | 0.21955 | 0.65654  | 0.67868 | 1.0766   | 0.094847 | 0.33975  | 0.79447 | 1.0479  | 0.13508  | 0.7066   | 0.9455  | 0.9335  | 0.28174 | 0.50233 | 0.40019 | 0.9729  | 0.060582 | 0.76577  | 0.94656 |
| 6 | 138453091 | rs34608452       | 4 | 0.6976 | 0.9693 | 0.1301 | 0.99081 | 0.26409 | 0.87532  | 0.86079 | 0.88896  | 0.099612 | 0.23596  | 0.92807 | 1.2676  | 0.13744  | 0.1035   | 0.9735  | --      | --      | --      | --      | 0.8943  | 0.066533 | 0.13258  | 0.96092 |
| 6 | 138453107 | rs139886970      | 4 | 0.938  | 0.9768 | 0.9847 | --      | --      | --       | --      | 0.86302  | 0.51279  | 0.47467  | 0.41257 | 0.94843 | 0.80581  | 0.94989  | 0.47476 | 0.88383 | 0.98175 | 0.79817 | 0.45001 | 1.1181  | 0.46687  | 0.34846  | 0.38506 |
| 6 | 138453140 | rs116354935      | 2 | 0.6576 | 1.2738 | 0.8866 | --      | --      | --       | --      | 1.3547   | 0.69606  | 0.18388  | 0.32316 | --      | --       | --       | --      | 1.1544  | 0.87998 | 0.73373 | 0.458   | --      | --       | --       | --      |
| 6 | 138453297 | chr6:138453297:D | 4 | 0.2727 | 0.9407 | 0.9892 | 0.91704 | 0.24016 | 0.87202  | 0.95052 | 0.92038  | 0.10819  | 0.42993  | 0.95246 | 0.92187 | 0.16016  | 0.54535  | 0.94441 | --      | --      | --      | --      | 0.95699 | 0.074533 | 0.44433  | 0.9524  |
| 6 | 138453519 | rs9402944        | 5 | 0.8625 | 0.9883 | 0.4929 | 1.1325  | 0.37009 | 0.66227  | 0.56351 | 1.208    | 0.13365  | 0.088444 | 0.82288 | 0.94011 | 0.18215  | 0.66554  | 0.87621 | 0.91994 | 0.38329 | 0.57346 | 0.41897 | 0.95005 | 0.092714 | 0.086446 | 0.81568 |
| 6 | 138453706 | rs10457668       | 4 | 0.1438 | 0.7642 | 0.7693 | 0.31245 | 0.9775  | 0.056531 | 0.3188  | 0.73181  | 0.5803   | 0.16077  | 0.37726 | 0.66393 | 0.41796  | 0.32213  | 0.79365 | --      | --      | --      | --      | 0.83983 | 0.2247   | 0.29917  | 0.74624 |
| 6 | 138454308 | rs9389561        | 5 | 0.6528 | 1.0134 | 0.9811 | 1.0885  | 0.12714 | 0.58672  | 0.98946 | 1.0033   | 0.057898 | 0.97119  | 0.98548 | 1.0321  | 0.091455 | 0.86267  | 0.9954  | 1.0233  | 0.15148 | 0.83687 | 0.60919 | 1.0068  | 0.040453 | 0.82404  | 0.99481 |
| 6 | 138454588 | rs12197868       | 4 | 0.8954 | 0.9952 | 0.9153 | 0.95382 | 0.21006 | 0.9691   | 0.53484 | 0.960154 | 0.068139 | 0.56819  | 1       | 1.0354  | 0.10994  | 0.66578  | 0.96969 | --      | --      | --      | --      | 1.008   | 0.048655 | 0.99729  | 0.95091 |
| 6 | 138454849 | rs142273356      | 2 | 0.7464 | 0.7981 | 0.9577 | --      | --      | --       | --      | 0.78134  | 0.80407  | 0.37675  | 0.35617 | 0.85121 | 1.4005   | 0.78119  | 0.35523 | --      | --      | --      | --      | --      | --       | --       | --      |
| 6 | 138455441 | rs118059460      | 3 | 0.722  | 1.0806 | 0.9771 | --      | --      | --       | --      | 1.033    | 0.38829  | 0.82971  | 0.42375 | 1.2252  | 0.69388  | 0.65531  | 0.50833 | --      | --      | --      | --      | 1.0839  | 0.28434  | 0.59473  | 0.52227 |
| 6 | 138455594 | rs1074232        | 4 | 0.6465 | 0.9642 | 0.1394 | 0.9899  | 0.26499 | 0.87978  | 0.85692 | 0.886    | 0.10024  | 0.22202  | 0.92094 | 1.2589  | 0.13832  | 0.11297  | 0.96464 | --      | --      | --      | --      | 0.89061 | 0.066909 | 0.11755  | 0.95436 |
| 6 | 138456294 | rs193230618      | 2 | 0.4671 | 0.4895 | 0.2436 | --      | --      | --       | --      | --       | --       | --       | 0.2324  | 0.98444 | 0.039512 | 0.60897  | 1.7887  | 1.447   | 0.54732 | 0.68702 | --      | --      | --       | --       | --      |
| 6 | 138456306 | rs149360145      | 4 | 0.4095 | 0.9562 | 0.9563 | 0.94142 | 0.23666 | 0.93868  | 0.84944 | 0.93957  | 0.10691  | 0.51174  | 0.87734 | 0.89739 | 0.15091  | 0.43049  | 0.88989 | --      | --      | --      | --      | 0.97965 | 0.072605 | 0.53232  | 0.87601 |
| 6 | 138456468 | rs139783386      | 5 | 0.5738 | 1.0355 | 0.7282 | 0.82329 | 0.28025 | 0.31264  | 0.66976 | 0.95681  | 0.12712  | 0.59794  | 0.73827 | 1.2401  | 0.19179  | 0.17978  | 0.86595 | 0.96414 | 0.42095 | 0.74248 | 0.3361  | 1.0583  | 0.081035 | 0.17936  | 0.87019 |
| 6 | 138456473 | rs113636406      | 4 | 0.2254 | 0.9348 | 0.9727 | 0.94477 | 0.24161 | 0.96473  | 0.92998 | 0.91576  | 0.10835  | 0.39272  | 0.93261 | 0.88643 | 0.15681  | 0.3959   | 0.93682 | --      | --      | --      | --      | 0.95432 | 0.074534 | 0.43216  | 0.93053 |
| 6 | 138456670 | rs146125964      | 2 | 0.7178 | 0.7249 | 0.6262 | --      | --      | --       | --      | 1.587    | 1.8386   | 0.54729  | 0.40707 | --      | --       | --       | --      | --      | --      | --      | --      | 0.57033 | 1.0172   | 0.76658  | 0.76944 |
| 6 | 138456791 | rs113504325      | 2 | 0.7178 | 0.7249 | 0.6262 | --      | --      | --       | --      | 1.587    | 1.8386   | 0.54729  | 0.40707 | --      | --       | --       | --      | --      | --      | --      | --      | 0.57033 | 1.0172   | 0.76658  | 0.76944 |
| 6 | 138456907 | rs78952471       | 4 | 0.2338 | 0.8205 | 0.6014 | --      | --      | --       | --      | 1.1281   | 0.34429  | 0.53719  | 0.58597 | 0.52984 | 0.43832  | 0.034561 | 0.76851 | 0.83886 | 0.64422 | 0.60049 | 0.49165 | 0.80182 | 0.22275  | 0.3728   | 0.71507 |
| 6 | 138456959 | rs55808177       | 5 | 0.2292 | 1.053  | 0.861  | 1.189   | 0.21476 | 0.24732  | 0.65456 | 0.99009  | 0.088045 | 0.89721  | 0.79187 | 1.1454  | 0.14826  | 0.45002  | 0.92157 | 0.97262 | 0.21348 | 0.80255 | 0.61021 | 1.0636  | 0.0556   | 0.25127  | 0.93808 |
| 6 | 138456978 | rs181009119      | 3 | 0.7166 | 0.7856 | 0.8018 | --      | --      | --       | --      | 0.47097  | 0.10172  | 0.17535  | 0.51365 | 1.137   | 1.2781   | 0.9509   | 0.72685 | --      | --      | --      | --      | 1.1627  | 1.2093   | 0.62362  | 0.31515 |
| 6 | 138457109 | rs76993683       | 5 | 0.9517 | 1.0027 | 0.8696 | 0.98332 | 0.2147  | 0.67874  | 0.69467 | 1.0796   | 0.91859  | 0.31951  | 0.80932 | 1.051   | 0.13069  | 0.6872   | 0.97682 | 0.90788 | 0.26472 | 0.36015 | 0.42997 | 0.96953 | 0.058995 | 0.73842  | 0.97073 |
| 6 | 138457248 | chr6:138457248:D | 5 | 0.9072 | 0.9948 | 0.8893 | 1.0225  | 0.22486 | 0.93537  | 0.66202 | 1.0554   | 0.093384 | 0.49075  | 0.79398 | 1.0544  | 0.13058  | 0.66738  | 0.97971 | 0.87886 | 0.24639 | 0.26908 | 0.51542 | 0.96509 | 0.059023 | 0.66647  | 0.96962 |
| 6 | 138457260 | rs80031715       | 4 | 0.9429 | 1.0049 | 0.969  | 0.94617 | 0.35054 | 0.41693  | 0.41573 | 1.0433   | 0.14116  | 0.5937   | 0.52911 | 0.92955 | 0.20239  | 0.68646  | 0.69307 | --      | --      | --      | --      | 1.009   | 0.088436 | 0.93652  | 0.67987 |
| 6 | 138457304 | rs117546150      | 5 | 0.5628 | 1.1352 | 0.9513 | 0.77611 | 0.76713 | 0.31188  | 0.62838 | 0.97091  | 0.45906  | 0.90328  | 0.55122 | 0.93172 | 0.70555  | 0.90181  | 0.66846 | 1.3635  | 0.77901 | 0.35229 | 0.45344 | 1.3034  | 0.30529  | 0.031469 | 0.68912 |
| 6 | 138457611 | rs111358225      | 2 | 0.7184 | 0.7254 | 0.6265 | --      | --      | --       | --      | 1.587    | 1.8386   | 0.54729  | 0.40707 | --      | --       | --       | --      | --      | --      | --      | --      | 0.57077 | 1.0175   | 0.76717  | 0.76933 |
| 6 | 138457735 | rs79578923       | 4 | 0.6892 | 1.0254 | 0.7502 | 0.86388 | 0.27023 | 0.36456  | 0.69344 | 0.98437  | 0.12433  | 0.81258  | 0.73698 | 1.2051  | 0.19318  | 0.24263  | 0.85436 | --      | --      | --      | --      | 1.0299  | 0.081766 | 0.25879  | 0.84857 |
| 6 | 138457936 | rs72564905       | 4 | 0.214  | 0.9333 | 0.973  | 0.91865 | 0.23865 | 0.83332  | 0.97053 | 0.91738  | 0.10812  | 0.41629  | 0.96091 | 0.88493 | 0.15739  | 0.41187  | 0.97172 | --      | --      | --      | --      | 0.95364 | 0.074484 | 0.43453  | 0.96671 |
| 6 | 138457964 | rs147830000      | 4 | 0.9322 | 1.0201 | 0.6378 | 0.41812 | 0.80901 | 0.22895  | 0.46189 | 0.83715  | 0.52086  | 0.43013  | 0.41208 | 1.2678  | 1.0486   | 0.49812  | 0.3588  | --      | --      | --      | --      | 1.1913  | 0.28628  | 0.91889  | 0.49815 |
| 6 | 138458066 | rs9376325        | 5 | 0.7037 | 1.0114 | 0.9819 | 1.0846  | 0.12696 | 0.61347  | 0.99278 | 1.0004   | 0.057896 | 0.99016  | 0.98644 | 1.0317  | 0.091592 | 0.86292  | 0.9908  | 1.0133  | 0.15101 | 0.92122 | 0.6103  | 1.0055  | 0.040496 | 0.84402  | 0.99191 |
| 6 | 138458286 | rs9402945        | 5 | 0.9208 | 1.0045 | 0.8974 | 0.96973 | 0.21611 | 0.64494  | 0.6929  | 1.0755   | 0.093151 | 0.34736  | 0.80712 | 1.0576  | 0.13213  | 0.64694  | 0.96856 | 0.93477 | 0.27569 | 0.51391 | 0.41172 | 0.97242 | 0.059676 | 0.77561  | 0.95677 |
| 6 | 138458420 | rs9989221        | 5 | 0.3574 | 1.0469 | 0.9789 | 1.1252  | 0.24456 | 0.48915  | 0.62893 | 1.0515   | 0.099176 | 0.50387  | 0.79296 | 1.1381  | 0.16715  | 0.4      |         |         |         |         |         |         |          |          |         |

|   |           |             |   |        |        |        |         |         |          |         |         |          |          |         |         |          |          |         |         |         |         |         |         |           |          |         |         |
|---|-----------|-------------|---|--------|--------|--------|---------|---------|----------|---------|---------|----------|----------|---------|---------|----------|----------|---------|---------|---------|---------|---------|---------|-----------|----------|---------|---------|
| 6 | 138464980 | rs72564908  | 5 | 0.2324 | 0.938  | 0.9336 | 0.93596 | 0.23514 | 0.84767  | 0.79528 | 0.92213 | 0.10537  | 0.34542  | 0.81159 | 0.89696 | 0.15631  | 0.38178  | 0.85514 | 1.2111  | 0.29997 | 0.04133 | 0.30055 | 0.94083 | 0.072946  | 0.29235  | 0.83743 |         |
| 6 | 138465030 | rs7771679   | 5 | 0.9949 | 1.0002 | 0.949  | 1.0832  | 1.13211 | 0.59844  | 0.88588 | 0.9799  | 0.059714 | 0.68515  | 0.89802 | 1.027   | 0.093501 | 0.90012  | 0.92316 | 1.0568  | 0.15458 | 0.57169 | 0.58301 | 0.99311 | 0.041397  | 0.91511  | 0.91902 |         |
| 6 | 138465065 | rs148492109 | 2 | 0.8213 | 0.7218 | 0.2946 | 3.1686  | 1.9741  | 0.40454  | 0.43479 | --      | --       | --       | --      | --      | --       | --       | 0.17655 | 1.9214  | 0.23411 | 0.53909 | --      | --      | --        | --       |         |         |
| 6 | 138465225 | rs9389565   | 5 | 0.942  | 0.9966 | 0.9119 | 1.0084  | 0.22747 | 0.88025  | 0.66188 | 1.0416  | 0.096279 | 0.61719  | 0.7935  | 1.0703  | 0.13446  | 0.58011  | 0.95307 | 0.85764 | 0.26484 | 0.19922 | 0.48701 | 0.9719  | 0.060847  | 0.76488  | 0.94246 |         |
| 6 | 138465286 | rs9389566   | 5 | 0.8771 | 0.993  | 0.8954 | 1.02    | 0.22731 | 0.93486  | 0.65735 | 1.0552  | 0.09447  | 0.48856  | 0.77819 | 1.0316  | 0.13206  | 0.79556  | 0.95623 | 0.84529 | 0.25266 | 0.1479  | 0.4873  | 0.96844 | 0.059785  | 0.71119  | 0.94034 |         |
| 6 | 138465341 | rs11154962  | 5 | 0.4993 | 1.0347 | 0.9881 | 1.1085  | 0.24793 | 0.53381  | 0.58647 | 1.0212  | 0.10046  | 0.57542  | 0.73751 | 1.11795 | 0.16963  | 0.51147  | 0.80183 | 1.0237  | 0.26801 | 0.895   | 0.48762 | 1.0241  | 0.066139  | 0.76195  | 0.81661 |         |
| 6 | 138465435 | rs17067151  | 5 | 0.8125 | 0.9892 | 0.9027 | 1.0228  | 0.22466 | 0.94677  | 0.65336 | 1.0516  | 0.095324 | 0.51942  | 0.76968 | 1.0283  | 0.13427  | 0.8      | 0.94246 | 0.85298 | 0.25566 | 0.16856 | 0.48025 | 0.9633  | 0.060335  | 0.65062  | 0.93355 |         |
| 6 | 138465498 | rs6570212   | 4 | 0.3723 | 0.8978 | 0.4711 | 0.78008 | 0.63486 | 0.94766  | 0.66629 | 0.98187 | 0.28318  | 0.9486   | 0.64662 | 0.52837 | 0.36231  | 0.068864 | 0.83635 | --      | --      | --      | --      | 0.96412 | 0.14765   | 0.91915  | 0.83573 |         |
| 6 | 138465573 | rs6570213   | 4 | 0.3787 | 0.899  | 0.4896 | 0.78267 | 0.63371 | 0.50641  | 0.68921 | 0.97479 | 0.28352  | 0.91913  | 0.65512 | 0.53287 | 0.36449  | 0.077076 | 0.85321 | --      | --      | --      | --      | 0.96551 | 0.14769   | 0.92143  | 0.84956 |         |
| 6 | 138466039 | rs139554589 | 2 | 0.383  | 0.5109 | 0.4563 | --      | --      | --       | --      | --      | --       | --       | --      | 0.3437  | 0.93587  | 0.046577 | 0.52506 | 1.1711  | 1.3538  | 0.76194 | 0.37353 | --      | --        | --       | --      |         |
| 6 | 138466525 | rs9389567   | 5 | 0.502  | 1.0259 | 0.9408 | 1.0694  | 0.16541 | 0.80432  | 0.69592 | 1.017   | 0.075143 | 0.75994  | 0.70563 | 1.0529  | 0.1191   | 0.61325  | 0.76903 | 0.88866 | 0.17948 | 0.22986 | 0.56935 | 1.0331  | 0.051582  | 0.35265  | 0.74064 |         |
| 6 | 138466581 | rs78867327  | 4 | 0.6799 | 1.1219 | 0.9447 | 2.3779  | 1.9289  | 0.011883 | 0.30306 | 0.97479 | 0.44905  | 0.90795  | 0.57348 | 0.84744 | 1.1697   | 0.5676   | 0.31884 | --      | --      | --      | --      | 1.2416  | 0.38052   | 0.73619  | 0.39802 |         |
| 6 | 138466741 | rs9402948   | 5 | 0.9673 | 0.998  | 0.8778 | 0.9716  | 0.24005 | 0.65198  | 0.55324 | 1.034   | 0.10196  | 0.63666  | 0.66888 | 1.0577  | 0.14098  | 0.63159  | 0.81946 | 0.77046 | 0.27701 | 0.02245 | 0.4236  | 0.98761 | 0.064739  | 0.96702  | 0.78291 |         |
| 6 | 138466826 | rs9402949   | 5 | 0.4429 | 0.9752 | 0.7972 | 1.0054  | 0.14546 | 0.99022  | 0.67664 | 0.91985 | 0.064938 | 0.073827 | 0.70426 | 1.061   | 0.09107  | 0.55046  | 0.75426 | 1.0241  | 0.17641 | 0.78839 | 0.40324 | 0.97944 | 0.04418   | 0.70886  | 0.73993 |         |
| 6 | 138466867 | rs146774933 | 3 | 0.5214 | 1.426  | 0.8478 | --      | --      | --       | --      | 1.1089  | 0.9608   | 0.87789  | 0.71853 | 2.2354  | 0.95978  | 0.41036  | 0.83373 | --      | --      | --      | --      | 1.1688  | 0.93715   | 0.36019  | 0.57388 |         |
| 6 | 138466990 | rs9389568   | 5 | 0.6195 | 0.9642 | 0.4293 | 1.3277  | 0.41699 | 0.19297  | 0.5129  | 1.1822  | 0.14329  | 0.1356   | 0.77776 | 0.91438 | 0.1923   | 0.53384  | 0.84165 | 0.77027 | 0.37232 | 0.15384 | 0.48825 | 0.88163 | 0.10141   | 0.072532 | 0.77471 |         |
| 6 | 138467413 | rs9402950   | 5 | 0.639  | 1.0184 | 0.8821 | 1.0643  | 0.17358 | 0.72196  | 0.67264 | 1.014   | 0.076897 | 0.79837  | 0.70025 | 1.0613  | 0.12167  | 0.55104  | 0.75749 | 0.84918 | 0.18327 | 0.10627 | 0.56417 | 1.0237  | 0.052483  | 0.4825   | 0.73448 |         |
| 6 | 138467422 | rs12526565  | 5 | 0.4219 | 1.0451 | 0.9767 | 1.1397  | 0.26996 | 0.37438  | 0.52423 | 0.99039 | 0.10942  | 0.92114  | 0.66215 | 1.0625  | 0.18198  | 0.70886  | 0.72343 | 0.98222 | 0.84534 | 0.85021 | 0.43586 | 1.0646  | 0.0772107 | 0.26739  | 0.72932 |         |
| 6 | 138467515 | rs77206663  | 4 | 0.57   | 1.0763 | 0.9771 | 1.251   | 0.54337 | 0.45239  | 0.30597 | 1.0268  | 0.28548  | 0.8227   | 0.36711 | 1.201   | 0.37521  | 0.25118  | 0.43479 | --      | --      | --      | --      | 1.0558  | 0.16456   | 0.38165  | 0.42175 |         |
| 6 | 138467566 | rs148145140 | 4 | 0.8659 | 1.0532 | 0.8952 | 2.0851  | 0.2333  | 0.082602 | 0.54455 | 0.61719 | 0.91607  | 0.30228  | 0.49252 | 0.93026 | 0.59127  | 0.085826 | 0.84598 | --      | --      | --      | --      | 1.2004  | 0.39782   | 0.53456  | 0.70471 |         |
| 6 | 138468048 | rs76104700  | 2 | 0.5174 | 0.5779 | 0.5617 | 0.42929 | 0.98989 | 0.1643   | 0.31011 | --      | --       | --       | --      | --      | --       | --       | --      | --      | --      | --      | --      | --      | 1.3028    | 1.6369   | 0.4276  | 0.39194 |
| 6 | 138468161 | rs187486417 | 2 | 0.9646 | 0.9607 | 0.7835 | --      | --      | --       | --      | 0.84769 | 1.012    | 0.63566  | 0.35054 | 1.5719  | 2.007    | 0.45518  | 0.32635 | --      | --      | --      | --      | --      | --        | --       | --      |         |
| 6 | 138468396 | rs9402951   | 5 | 0.8688 | 0.992  | 0.8913 | 0.9843  | 0.2307  | 0.64981  | 0.55627 | 1.033   | 0.10065  | 0.63828  | 0.65565 | 1.0239  | 0.14144  | 0.85843  | 0.80304 | 0.77005 | 0.26845 | 0.01833 | 0.42213 | 0.98413 | 0.064388  | 0.86255  | 0.76513 |         |
| 6 | 138468794 | rs180726425 | 2 | 0.5177 | 0.5781 | 0.5618 | 0.42943 | 0.99013 | 0.16442  | 0.31    | --      | --       | --       | --      | --      | --       | --       | --      | --      | --      | --      | --      | 1.3028  | 1.6369    | 0.4276   | 0.39194 |         |
| 6 | 138468961 | rs188271340 | 2 | 0.6926 | 0.7286 | 0.5996 | --      | --      | --       | --      | 0.4266  | 1.2967   | 0.048085 | 0.30511 | --      | --       | --       | --      | --      | --      | --      | --      | 1.0136  | 1.0182    | 0.50436  | 0.32716 |         |
| 6 | 138469024 | rs9494946   | 5 | 0.4422 | 0.975  | 0.8402 | 1.0043  | 0.14606 | 0.97261  | 0.67443 | 0.92247 | 0.06518  | 0.082409 | 0.70014 | 1.0506  | 0.10008  | 0.63087  | 0.74378 | 1.0284  | 0.17679 | 0.74337 | 0.40037 | 0.97979 | 0.044406  | 0.64395  | 0.73201 |         |
| 6 | 138469030 | rs80109598  | 5 | 0.3891 | 1.0489 | 0.98   | 1.1428  | 0.27365 | 0.3532   | 0.51727 | 0.99453 | 0.11047  | 0.96271  | 0.65518 | 1.0665  | 0.18429  | 0.66711  | 0.69971 | 0.97965 | 0.28589 | 0.94839 | 0.42392 | 1.0678  | 0.072962  | 0.23054  | 0.70399 |         |
| 6 | 138469061 | rs78932176  | 5 | 0.5286 | 1.0362 | 0.9933 | 1.0982  | 0.28743 | 0.52116  | 0.48735 | 0.99557 | 0.11142  | 0.97734  | 0.62953 | 1.0335  | 0.18732  | 0.87409  | 0.67499 | 0.99401 | 0.29242 | 0.92248 | 0.41008 | 1.0538  | 0.074138  | 0.36887  | 0.68401 |         |
| 6 | 138469140 | rs138987397 | 3 | 0.7237 | 0.7754 | 0.8884 | 0.6676  | 1.7458  | 0.42395  | 0.31769 | --      | --       | --       | --      | --      | 0.40844  | 1.6136   | 0.25568 | 0.40461 | 0.98791 | 0.90568 | 0.94394 | 0.98791 | 0.90568   | 0.94394  | 0.98791 |         |
| 6 | 138469205 | rs35349863  | 5 | 0.7998 | 0.9911 | 0.9955 | 1.018   | 0.15475 | 0.9784   | 0.64773 | 0.97218 | 0.069117 | 0.55746  | 0.67242 | 0.97149 | 0.10496  | 0.65536  | 0.73705 | 1.0133  | 0.18706 | 0.89606 | 0.39214 | 1.0004  | 0.04752   | 0.95281  | 0.71097 |         |
| 6 | 138469237 | rs113366516 | 2 | 0.9086 | 0.9613 | 0.714  | --      | --      | --       | --      | --      | --       | --       | 1.3304  | 0.95084 | 0.36634  | 0.30855  | --      | --      | --      | --      | 0.91545 | 0.36879 | 0.4691    | 0.35967  |         |         |
| 6 | 138469351 | rs74777029  | 3 | 0.9226 | 0.9642 | 0.9891 | 0.96787 | 1.1493  | 0.49744  | 0.3364  | --      | --       | --       | --      | --      | --       | --       | --      | 0.84506 | 0.97148 | 0.60087 | 0.31775 | 0.98952 | 0.43507   | 0.95252  | 0.32192 |         |
| 6 | 138469798 | rs12524453  | 5 | 0.4219 | 1.045  | 0.9776 | 1.1382  | 0.26868 | 0.37503  | 0.52907 | 0.99252 | 0.10857  | 0.94306  | 0.67366 | 1.0492  | 0.1829   | 0.77468  | 0.71424 | 0.98019 | 0.28162 | 0.83543 | 0.43573 | 1.0662  | 0.072114  | 0.25093  | 0.71865 |         |
| 6 | 138469843 | rs187544733 | 2 | 0.8199 | 0.9049 | 0.9238 | --      | --      | --       | --      | 0.84269 | 0.86431  | 0.50478  | 0.30742 | --      | --       | --       | --      | --      | --      | --      | --      | 0.92756 | 0.51002   | 0.4981   | 0.36645 |         |
| 6 | 138469889 | rs7769985   | 5 | 0.4224 | 0.9741 | 0.8207 | 1.0148  | 0.14598 | 0.9293   | 0.67751 | 0.92146 | 0.064807 | 0.079858 | 0.70721 | 1.0559  | 0.099133 | 0.59735  | 0.75454 | 1.0138  | 0.17492 | 0.89538 | 0.40505 | 0.97745 | 0.044186  | 0.64541  | 0.74027 |         |
| 6 | 138469932 | rs12527923  | 5 | 0.4291 | 1.0442 | 0.9973 | 1.1375  | 0.26817 | 0.37615  | 0.53039 | 0.99175 | 0.10852  | 0.93467  | 0.67158 | 1.0492  | 0.18292  | 0.77473  | 0.71332 | 0.97827 | 0.28111 | 0.8223  | 0.43595 | 1.0655  | 0.072114  | 0.26054  | 0.71705 |         |
| 6 | 138470130 | rs12527958  | 5 | 0.7633 | 0.9895 | 0.9340 | 1.0164  | 0.15445 | 0.99613  | 0.64988 | 0.9703  | 0.068765 | 0.53204  | 0.67811 | 0.97132 | 0.10457  | 0.65193  | 0.73991 | 1.015   | 0.18646 | 0.87863 | 0.39442 | 0.99845 | 0.04739   | 0.90931  | 0.71397 |         |
| 6 | 138470288 | rs72986814  | 5 | 0.5405 | 1.0666 | 0.6712 | 1.2739  | 0.57325 | 0.31248  | 0.48617 | 0.82447 | 0.20318  | 0.11515  | 0.59502 | 1.0235  | 0.40665  | 0.96505  | 0.58792 | 1.0949  | 0.59917 | 0.6982  | 0.36733 | 1.1891  | 0.13606   | 0.024578 | 0.66357 |         |
| 6 | 138470335 | rs150398673 | 4 | 0.5941 | 1.164  | 0.9594 | --      | --      | --       | --      | 1.3021  | 0.43731  | 0.21419  | 0.47731 | 1.2318  | 1.2355   | 0.80096  | 0.30585 | 1.525   | 0.96882 | 0.30709 | 0.44377 | 0.98028 | 0.43362   | 0.80703  | 0.68719 |         |
| 6 | 138470340 | rs182664641 | 4 | 0.6302 | 1.1367 | 0.9205 | 2.0692  | 1.1042  | 0.008768 | 0.4998  | 1.0215  | 0.59271  | 0.87957  | 0.35443 | 1.4021  | 0.64385  | 0.2692   | 0.45667 | --      | --      | --      | --      | 1.0428  | 0.35277   | 0.84422  | 0.39238 |         |
| 6 | 138470342 | rs4896321   | 5 | 0.2245 | 0.9371 | 0.7694 | 0.92747 | 0.22618 | 0.73538  | 0.67242 | 0.90542 | 0.10555  | 0.17562  | 0.68776 | 0.85858 | 0.15927  | 0.19733  | 0.76316 | 1.2946  | 0.27569 | 0.00474 | 0.3295  | 0.94955 | 0.073094  | 0.25132  | 0.73777 |         |
| 6 | 138470602 | rs35634645  | 4 | 0.4617 | 0.9457 | 0.1948 | 0.91355 | 0.28743 | 0.87837  | 0.72879 | 0.8843  | 0.10433  | 0.17056  | 0.81348 | 1.241   | 0.14591  | 0.13322  | 0.89299 | --      | --      | --      | --      | 0.88233 | 0.069672  | 0.09093  | 0.88326 |         |
| 6 | 138470632 | rs115757396 | 4 | 0.2613 | 1.0494 | 0.7859 | 1.082   | 0.21838 | 0.24907  | 0.46517 | 1.1356  | 0.091687 | 0.013903 | 0.56647 | 1.0502  | 0.1      |          |         |         |         |         |         |         |           |          |         |         |

|   |           |                 |   |        |        |        |         |         |          |         |         |          |          |         |         |         |          |         |         |         |         |         |         |          |          |         |
|---|-----------|-----------------|---|--------|--------|--------|---------|---------|----------|---------|---------|----------|----------|---------|---------|---------|----------|---------|---------|---------|---------|---------|---------|----------|----------|---------|
| 6 | 138479488 | rs116947725     | 4 | 0.7212 | 1.0333 | 0.3824 | 0.61728 | 0.39805 | 0.097794 | 0.58122 | 0.90055 | 0.18704  | 0.41396  | 0.67742 | 0.99591 | 0.28542 | 0.81977  | 0.75698 | --      | --      | --      | --      | 1.1458  | 0.11349  | 0.18252  | 0.7854  |
| 6 | 138479683 | rs9494947       | 5 | 0.4155 | 1.0468 | 0.9798 | 1.1443  | 0.27727 | 0.33618  | 0.50874 | 1.0077  | 0.11096  | 0.89862  | 0.64893 | 1.0212  | 0.1861  | 0.94146  | 0.69335 | 0.94764 | 0.29433 | 0.62406 | 0.41004 | 1.0687  | 0.073953 | 0.2193   | 0.70237 |
| 6 | 138479807 | rs1334707       | 5 | 0.8586 | 0.9925 | 0.9422 | 1.0321  | 0.19732 | 0.67835  | 0.5712  | 0.95637 | 0.083545 | 0.44098  | 0.66737 | 0.9526  | 0.12838 | 0.55722  | 0.72334 | 1.1421  | 0.22791 | 0.09816 | 0.31457 | 1.0056  | 0.056561 | 0.99544  | 0.70814 |
| 6 | 138480019 | rs75978446      | 5 | 0.4211 | 1.0453 | 0.9742 | 1.1724  | 0.27134 | 0.24404  | 0.51084 | 1.0083  | 0.11003  | 0.88482  | 0.64065 | 0.98731 | 0.17949 | 0.82294  | 0.70157 | 0.9955  | 0.28292 | 0.93244 | 0.41556 | 1.0663  | 0.072447 | 0.22388  | 0.6966  |
| 6 | 138480084 | rs111543149     | 5 | 0.4205 | 1.0446 | 0.9766 | 1.1815  | 0.26881 | 0.2272   | 0.52462 | 1.0007  | 0.10822  | 0.9674   | 0.65665 | 1.0194  | 0.17909 | 0.96893  | 0.7196  | 0.99859 | 0.28017 | 0.95587 | 0.42477 | 1.0623  | 0.07124  | 0.26984  | 0.72187 |
| 6 | 138480415 | rs77098998      | 5 | 0.6772 | 1.1025 | 0.9379 | 2.6544  | 1.5554  | 1.93E-05 | 0.38271 | 0.94205 | 0.3877   | 0.8023   | 0.62456 | 0.83332 | 1.0449  | 0.5238   | 0.35188 | 0.81665 | 1.0229  | 0.54355 | 0.30255 | 1.2585  | 0.32855  | 0.65757  | 0.47927 |
| 6 | 138480597 | rs77085298      | 2 | 0.8913 | 1.038  | 0.9291 | --      | --      | --       | --      | 1.0795  | 0.51829  | 0.66428  | 0.30941 | --      | --      | --       | --      | --      | --      | --      | --      | 1.0225  | 0.32079  | 0.94123  | 0.33086 |
| 6 | 138480663 | rs117258298     | 2 | 0.7413 | 1.0701 | 0.6796 | --      | --      | --       | --      | 0.95974 | 0.33416  | 0.66992  | 0.34476 | --      | --      | --       | --      | --      | --      | --      | --      | 1.1432  | 0.26025  | 0.060827 | 0.35092 |
| 6 | 138481591 | rs1474664       | 5 | 0.4418 | 1.0567 | 0.8824 | 0.81142 | 0.43171 | 0.57749  | 0.42321 | 1.1579  | 0.14334  | 0.10544  | 0.65286 | 1.1389  | 0.20939 | 0.44202  | 0.68876 | 0.8925  | 0.48384 | 0.48433 | 0.30505 | 1.0199  | 0.09384  | 0.5961   | 0.69565 |
| 6 | 138481846 | rs1334708       | 5 | 0.4353 | 1.044  | 0.9673 | 1.1334  | 0.26904 | 0.42777  | 0.49114 | 0.98405 | 0.11019  | 0.83728  | 0.60563 | 1.0619  | 0.18138 | 0.70212  | 0.67334 | 0.96413 | 0.28457 | 0.71806 | 0.40787 | 1.0673  | 0.072581 | 0.24748  | 0.67449 |
| 6 | 138482012 | rs9402955       | 5 | 0.7247 | 0.9813 | 0.8071 | 0.99164 | 0.23939 | 0.94813  | 0.52924 | 0.92823 | 0.10597  | 0.20475  | 0.56782 | 0.8956  | 0.16766 | 0.26119  | 0.64882 | 1.2654  | 0.26274 | 0.00562 | 0.31954 | 1.0039  | 0.072606 | 0.98977  | 0.62294 |
| 6 | 138482117 | rs57216170      | 3 | 0.9902 | 0.9957 | 0.9119 | 1.3162  | 1.379   | 0.27993  | 0.31159 | 0.92248 | 0.39288  | 0.64083  | 0.41437 | --      | --      | --       | --      | 1.3493  | 0.93436 | 0.35665 | 0.36225 | --      | --       | --       | --      |
| 6 | 138482931 | rs184608149     | 4 | 0.6843 | 1.0573 | 0.9912 | 1.0627  | 0.69844 | 0.66311  | 0.37541 | 1.1354  | 0.27221  | 0.39184  | 0.51988 | 1.0545  | 0.35651 | 0.80333  | 0.60265 | --      | --      | --      | --      | 1.0241  | 0.18335  | 0.37021  | 0.52235 |
| 6 | 138483056 | rs189172668     | 4 | 0.8729 | 1.0266 | 0.9823 | 0.95402 | 0.7188  | 0.71952  | 0.34432 | 1.0699  | 0.31838  | 0.56703  | 0.35854 | 0.88588 | 0.41666 | 0.58522  | 0.50101 | --      | --      | --      | --      | 1.058   | 0.2269   | 0.62472  | 0.36432 |
| 6 | 138483373 | rs118044713     | 4 | 0.9661 | 1.0061 | 0.73   | 1.1002  | 0.58493 | 0.98147  | 0.30024 | 0.782   | 0.29871  | 0.043615 | 0.40923 | 1.3895  | 0.44222 | 0.075568 | 0.39234 | --      | --      | --      | --      | 1.038   | 0.18496  | 0.56803  | 0.39171 |
| 6 | 138483911 | rs181885905     | 3 | 0.5661 | 0.795  | 0.8519 | --      | --      | --       | --      | 0.89637 | 0.94555  | 0.88082  | 0.69578 | 0.40854 | 1.2467  | 0.26954  | 0.83068 | --      | --      | --      | --      | 0.84873 | 0.47186  | 0.7913   | 0.78242 |
| 6 | 138484007 | rs112402381     | 4 | 0.8172 | 1.0341 | 0.6998 | 1.1946  | 0.61765 | 0.72856  | 0.30985 | 0.8107  | 0.30428  | 0.097771 | 0.41767 | 1.5067  | 0.44154 | 0.036944 | 0.40116 | --      | --      | --      | --      | 1.0457  | 0.18615  | 0.52037  | 0.40008 |
| 6 | 138484062 | rs1931868       | 4 | 0.4035 | 0.9466 | 0.9761 | 0.95669 | 0.26311 | 0.84052  | 0.54106 | 0.90587 | 0.1272   | 0.14603  | 0.54829 | 1.0009  | 0.20091 | 0.98406  | 0.61778 | --      | --      | --      | --      | 0.95527 | 0.087336 | 0.31981  | 0.60136 |
| 6 | 138484125 | rs72986828      | 5 | 0.7988 | 1.0193 | 0.9453 | 1.2491  | 0.37384 | 0.086609 | 0.34241 | 0.92977 | 0.14825  | 0.2065   | 0.39516 | 1.0612  | 0.25871 | 0.66197  | 0.39021 | 1.0208  | 0.33798 | 0.85873 | 0.31031 | 1.0405  | 0.098878 | 0.27664  | 0.42585 |
| 6 | 138484242 | chr6:138484242i | 5 | 0.8028 | 1.0212 | 0.8904 | 1.3423  | 0.43035 | 0.031004 | 0.32993 | 0.90984 | 0.16663  | 0.17584  | 0.42333 | 1.1262  | 0.28799 | 0.3177   | 0.38774 | 0.92467 | 0.38542 | 0.54147 | 0.31992 | 1.049   | 0.1111   | 0.27568  | 0.42324 |
| 6 | 138484293 | rs140289353     | 3 | 0.7677 | 1.1523 | 0.9381 | --      | --      | --       | --      | 1.3421  | 1.0507   | 0.32774  | 0.30411 | 1.8212  | 1.6562  | 0.40181  | 0.32594 | --      | --      | --      | --      | 1.0433  | 0.57093  | 0.41628  | 0.51095 |
| 6 | 138484764 | rs6907714       | 5 | 0.8154 | 1.0177 | 0.9331 | 1.2375  | 0.37767 | 0.11617  | 0.33798 | 0.92016 | 0.14887  | 0.15627  | 0.3979  | 1.0693  | 0.25995 | 0.60829  | 0.39185 | 0.9905  | 0.34318 | 0.92507 | 0.30773 | 1.045   | 0.099425 | 0.24053  | 0.428   |
| 6 | 138484929 | rs4896325       | 4 | 0.6912 | 0.9793 | 0.8359 | 1.1092  | 0.23609 | 0.36101  | 0.41116 | 0.91317 | 0.10114  | 0.052602 | 0.46757 | 1.016   | 0.16459 | 0.92292  | 0.51642 | --      | --      | --      | --      | 0.99468 | 0.069357 | 0.8852   | 0.50278 |
| 6 | 138485143 | rs118170540     | 4 | 0.7741 | 1.0424 | 0.7215 | 1.1862  | 0.61409 | 0.75761  | 0.30691 | 0.82196 | 0.30348  | 0.11504  | 0.41203 | 1.497   | 0.44224 | 0.038702 | 0.39906 | --      | --      | --      | --      | 1.0564  | 0.18543  | 0.39113  | 0.4002  |
| 6 | 138485243 | rs117114474     | 3 | 0.6278 | 1.1058 | 0.9578 | --      | --      | --       | --      | 1.1976  | 0.35673  | 0.20863  | 0.42366 | 1.1307  | 0.66014 | 0.77531  | 0.441   | --      | --      | --      | --      | 1.05    | 0.27646  | 0.70231  | 0.42549 |
| 6 | 138485365 | chr6:138485365i | 4 | 0.6719 | 0.978  | 0.8351 | 1.1176  | 0.23746 | 0.3128   | 0.40489 | 0.9144  | 0.10085  | 0.055058 | 0.46472 | 1.0196  | 0.1636  | 0.88945  | 0.51224 | --      | --      | --      | --      | 0.99066 | 0.069195 | 0.80945  | 0.49803 |
| 6 | 138485630 | rs146977174     | 2 | 0.8347 | 1.1156 | 0.6438 | --      | --      | --       | --      | --      | --       | --       | --      | 1.4697  | 0.79386 | 0.42712  | 0.41364 | 0.90134 | 0.69834 | 0.72972 | 0.50095 | --      | --       | --       | --      |
| 6 | 138485709 | rs80001578      | 2 | 0.3627 | 0.4088 | 0.5778 | 0.33572 | 1.0445  | 0.12908  | 0.30654 | --      | --       | --       | --      | --      | --      | --       | --      | --      | --      | --      | --      | 1.8691  | 2.9024   | 0.15162  | 0.374   |
| 6 | 138485905 | rs77212912      | 5 | 0.6467 | 1.0541 | 0.9617 | 1.2196  | 0.61535 | 0.32755  | 0.41564 | 0.91771 | 0.23062  | 0.43722  | 0.489   | 0.97432 | 0.44406 | 0.81575  | 0.46413 | 1.0304  | 0.51836 | 0.90314 | 0.38728 | 1.119   | 0.14856  | 0.11022  | 0.5556  |
| 6 | 138486268 | rs74534234      | 4 | 0.8798 | 0.9697 | 0.7687 | 0.53175 | 1.0444  | 0.24084  | 0.32386 | 1.3322  | 0.39159  | 0.15011  | 0.47289 | 0.84558 | 0.56336 | 0.44251  | 0.57178 | --      | --      | --      | --      | 0.89528 | 0.2709   | 0.41725  | 0.48801 |
| 6 | 138486306 | rs147459533     | 5 | 0.5738 | 1.1561 | 0.9817 | 0.82948 | 1.0015  | 0.68375  | 0.38259 | 1.0162  | 0.54811  | 0.92023  | 0.34909 | 1.2038  | 0.94665 | 0.45314  | 0.35109 | 0.82322 | 1.006   | 0.64234 | 0.40736 | 1.3061  | 0.34081  | 0.012732 | 0.4195  |
| 6 | 138486339 | rs72986831      | 5 | 0.8371 | 1.0169 | 0.9533 | 1.2688  | 0.40586 | 0.095564 | 0.32377 | 0.93385 | 0.16037  | 0.27806  | 0.40015 | 1.1063  | 0.28627 | 0.37312  | 0.37021 | 0.99674 | 0.35435 | 0.9744  | 0.32845 | 1.0302  | 0.10849  | 0.47255  | 0.41239 |
| 6 | 138486340 | rs9484119       | 2 | 0.9372 | 1.0186 | 0.8298 | --      | --      | --       | --      | --      | --       | --       | 0.88564 | 0.69142 | 0.38976 | 0.34061  | --      | --      | --      | --      | 1.0372  | 0.24867 | 0.52973  | 0.36396  |         |
| 6 | 138486368 | rs72986833      | 5 | 0.765  | 1.0342 | 0.9573 | 1.1377  | 0.57626 | 0.49009  | 0.39583 | 0.89766 | 0.21926  | 0.28711  | 0.46647 | 0.98945 | 0.44221 | 0.84864  | 0.41896 | 1.0073  | 0.49801 | 0.99667 | 0.3855  | 1.1032  | 0.14704  | 0.12441  | 0.5191  |
| 6 | 138486391 | rs72986835      | 5 | 0.8546 | 1.0154 | 0.914  | 1.2984  | 0.41536 | 0.066104 | 0.33022 | 0.91309 | 0.16637  | 0.18306  | 0.4144  | 1.1234  | 0.28641 | 0.31692  | 0.3822  | 0.93081 | 0.38368 | 0.56333 | 0.31136 | 1.0376  | 0.11033  | 0.38402  | 0.42096 |
| 6 | 138486504 | rs185803685     | 3 | 0.5811 | 1.4232 | 0.9888 | --      | --      | --       | --      | 1.4474  | 1.4294   | 0.39139  | 0.30794 | 1.182   | 1.4907  | 0.92087  | 0.35432 | --      | --      | --      | --      | 1.5092  | 0.82994  | 0.27418  | 0.40489 |
| 6 | 138486677 | rs36051223      | 4 | 0.4688 | 0.9472 | 0.5232 | 0.97387 | 0.43291 | 0.81038  | 0.55112 | 0.91699 | 0.14627  | 0.41624  | 0.67057 | 1.2396  | 1.09638 | 0.15463  | 0.71232 | --      | --      | --      | --      | 0.8956  | 0.099893 | 0.14215  | 0.67591 |
| 6 | 138486983 | rs6931276       | 5 | 0.7619 | 1.0346 | 0.9587 | 1.1334  | 0.57589 | 0.50399  | 0.3955  | 0.89817 | 0.21932  | 0.28961  | 0.46634 | 0.99127 | 0.44207 | 0.85676  | 0.41907 | 1.0201  | 0.49861 | 0.93945 | 0.38382 | 1.1027  | 0.14715  | 0.12478  | 0.51902 |
| 6 | 138487465 | rs9484121       | 4 | 0.8544 | 1.0142 | 0.8818 | 1.1967  | 0.36366 | 0.20337  | 0.33917 | 0.92479 | 0.14916  | 0.17228  | 0.38873 | 1.0519  | 0.25934 | 0.71181  | 0.38394 | --      | --      | --      | --      | 1.0377  | 0.098717 | 0.30578  | 0.42198 |
| 6 | 138487747 | rs77342458      | 3 | 0.8212 | 1.0341 | 0.4996 | --      | --      | --       | --      | 0.81755 | 0.30169  | 0.08689  | 0.39183 | 1.5193  | 0.43855 | 0.028223 | 0.38588 | --      | --      | --      | --      | 1.0549  | 0.18504  | 0.40262  | 0.38374 |
| 6 | 138487933 | rs117576393     | 5 | 0.8707 | 1.0145 | 0.9726 | 0.78847 | 0.42633 | 0.38932  | 0.5375  | 1.0202  | 0.17598  | 0.83894  | 0.65146 | 0.93168 | 0.2872  | 0.78926  | 0.67366 | 1.0908  | 0.53481 | 0.68871 | 0.3862  | 1.0417  | 0.11555  | 0.77977  | 0.67603 |
| 6 | 138488146 | rs73774676      | 5 | 0.7584 | 1.0352 | 0.9576 | 1.1329  | 0.57639 | 0.5212   | 0.39665 | 0.89687 | 0.21979  | 0.28563  | 0.46783 | 0.99443 | 0.44229 | 0.87253  | 0.41962 | 1.0238  | 0.49898 | 0.92386 | 0.38473 | 1.1035  | 0.14721  | 0.1236   | 0.51911 |
| 6 | 138488247 | rs12528094      | 5 | 0.9808 | 0.9978 | 0.9796 | 0.79084 | 0.44841 | 0.41907  | 0.51986 | 1.0158  | 0.18975  | 0.87244  | 0.62319 | 0.91056 | 0.30195 | 0.71111  | 0.65379 | 1.1284  | 0.6318  |         |         |         |          |          |         |

|   |           |                  |   |        |        |        |         |         |         |         |         |          |          |         |         |          |         |         |         |         |         |         |         |          |         |         |
|---|-----------|------------------|---|--------|--------|--------|---------|---------|---------|---------|---------|----------|----------|---------|---------|----------|---------|---------|---------|---------|---------|---------|---------|----------|---------|---------|
| 6 | 138493890 | rs78583725       | 3 | 0.8538 | 0.9783 | 0.916  | --      | --      | --      | 0.92305 | 0.23645 | 0.30625  | 0.34151  | 1.0987  | 0.34246 | 0.43614  | 0.35112 | --      | --      | --      | --      | 0.97943 | 0.15033 | 0.6457   | 0.33181 |         |
| 6 | 138493904 | rs189439951      | 2 | 0.9908 | 1.0055 | 0.4505 | --      | --      | --      | 0.83409 | 0.53486 | 0.52883  | 0.62194  | --      | --      | --       | --      | 1.9944  | 1.024   | 0.3088  | 0.65689 | --      | --      | --       | --      |         |
| 6 | 138494011 | rs148126262      | 3 | 0.7056 | 1.2058 | 0.6932 | --      | --      | --      | 1.0103  | 0.89463 | 0.97935  | 0.38471  | 0.45346 | 1.4154  | 0.17066  | 0.46313 | --      | --      | --      | --      | 1.636   | 0.65584 | 0.069232 | 0.36416 |         |
| 6 | 138494059 | rs74443731       | 2 | 0.9429 | 0.9788 | 0.724  | --      | --      | --      | 1.0538  | 0.36517 | 0.65255  | 0.31295  | 0.84132 | 0.52274 | 0.29434  | 0.35493 | --      | --      | --      | --      | --      | --      | --       | --      |         |
| 6 | 138494177 | rs77006579       | 3 | 0.8526 | 0.9781 | 0.9147 | --      | --      | --      | 0.9225  | 0.23642 | 0.3041   | 0.34249  | 1.0996  | 0.34232 | 0.43332  | 0.35235 | --      | --      | --      | --      | 0.97923 | 0.15035 | 0.64973  | 0.3329  |         |
| 6 | 138494188 | rs12191707       | 4 | 0.9086 | 0.9954 | 0.9894 | 1.0589  | 0.19784 | 0.16717 | 0.38446 | 0.98819 | 0.081028 | 0.80689  | 0.48162 | 1.0064  | 0.11603  | 0.77137 | 0.5534  | --      | --      | --      | --      | 0.99181 | 0.052619 | 0.7477  | 0.5415  |
| 6 | 138494248 | rs74540249       | 3 | 0.8486 | 0.9775 | 0.9213 | --      | --      | --      | 0.92248 | 0.23643 | 0.30373  | 0.34237  | 1.0916  | 0.34299 | 0.46962  | 0.35168 | --      | --      | --      | --      | 0.97972 | 0.15034 | 0.65134  | 0.33245 |         |
| 6 | 138494287 | chr6:138494287:D | 3 | 0.8666 | 0.9834 | 0.8492 | --      | --      | --      | 0.94376 | 0.20038 | 0.39048  | 0.34969  | 1.131   | 0.26843 | 0.28653  | 0.38971 | --      | --      | --      | --      | 0.96915 | 0.12655 | 0.73514  | 0.36874 |         |
| 6 | 138494319 | rs7766692        | 3 | 0.8526 | 0.9781 | 0.9147 | --      | --      | --      | 0.9225  | 0.23642 | 0.30409  | 0.34249  | 1.0996  | 0.34232 | 0.43332  | 0.35235 | --      | --      | --      | --      | 0.97923 | 0.15035 | 0.64976  | 0.3329  |         |
| 6 | 138494395 | rs140985476      | 2 | 0.9316 | 0.9747 | 0.726  | --      | --      | --      | 1.0485  | 0.36462 | 0.68056  | 0.31052  | 0.83842 | 0.52354 | 0.28242  | 0.35354 | --      | --      | --      | --      | --      | --      | --       | --      |         |
| 6 | 138494420 | chr6:138494420:D | 3 | 0.8811 | 1.0215 | 0.6037 | --      | --      | --      | 0.83777 | 0.29777 | 0.094972 | 0.35847  | 1.4003  | 0.42171 | 0.039272 | 0.35428 | --      | --      | --      | --      | 1.0361  | 0.17518 | 0.46455  | 0.35999 |         |
| 6 | 138494455 | rs150196417      | 2 | 0.6119 | 0.6698 | 0.2244 | --      | --      | --      | 1.899   | 1.1297  | 0.11956  | 0.35482  | --      | --      | --       | --      | --      | --      | --      | --      | 0.36791 | 0.74094 | 0.059995 | 0.48788 |         |
| 6 | 138494601 | rs183832633      | 3 | 0.8527 | 0.9782 | 0.9147 | --      | --      | --      | 0.92252 | 0.23642 | 0.30419  | 0.34248  | 1.0996  | 0.34232 | 0.43344  | 0.35235 | --      | --      | --      | --      | 0.97924 | 0.15035 | 0.64983  | 0.3329  |         |
| 6 | 138494604 | chr6:138494604:D | 3 | 0.8527 | 0.9782 | 0.9147 | --      | --      | --      | 0.92252 | 0.23642 | 0.30419  | 0.34248  | 1.0996  | 0.34232 | 0.43344  | 0.35235 | --      | --      | --      | --      | 0.97923 | 0.15035 | 0.64982  | 0.3329  |         |
| 6 | 138494750 | rs117022347      | 2 | 0.9429 | 0.9788 | 0.724  | --      | --      | --      | 1.0538  | 0.36518 | 0.65229  | 0.31293  | 0.84132 | 0.52274 | 0.29435  | 0.35493 | --      | --      | --      | --      | --      | --      | --       | --      |         |
| 6 | 138494760 | rs73563297       | 2 | 0.4482 | 1.8968 | 0.5843 | 1.2719  | 1.1164  | 0.84085 | 0.3763  | --      | --       | --       | --      | --      | --       | --      | 3.2346  | 1.2901  | 0.01632 | 0.40212 | --      | --      | --       | --      |         |
| 6 | 138494969 | rs181432793      | 2 | 0.9574 | 1.0446 | 0.3653 | --      | --      | --      | --      | --      | --       | --       | 0.25922 | 1.743   | 0.056833 | 0.37985 | --      | --      | --      | --      | 1.5472  | 0.92538 | 0.11003  | 0.38343 |         |
| 6 | 138495216 | rs76259268       | 3 | 0.8547 | 0.9783 | 0.9372 | --      | --      | --      | 0.92826 | 0.2382  | 0.35032  | 0.34824  | 1.0794  | 0.34558 | 0.52194  | 0.35272 | --      | --      | --      | --      | 0.9806  | 0.15111 | 0.66198  | 0.33368 |         |
| 6 | 138495587 | rs75806552       | 3 | 0.8536 | 0.9783 | 0.9173 | --      | --      | --      | 0.92333 | 0.23643 | 0.30809  | 0.34157  | 1.0976  | 0.34255 | 0.44132  | 0.35097 | --      | --      | --      | --      | 0.97946 | 0.15035 | 0.65035  | 0.3321  |         |
| 6 | 138495803 | rs182365637      | 2 | 0.8356 | 1.2767 | 0.8403 | 1.8161  | 2.1085  | 0.85895 | 0.51308 | --      | --       | --       | --      | --      | --       | --      | 1.0884  | 1.4188  | 0.86043 | 0.38091 | --      | --      | --       | --      |         |
| 6 | 138495819 | rs187416476      | 2 | 0.8112 | 1.2675 | 0.8838 | 1.7968  | 2.5847  | 0.35628 | 0.51746 | --      | --       | --       | --      | --      | --       | --      | 1.1933  | 1.0749  | 0.32002 | 0.32544 | --      | --      | --       | --      |         |
| 6 | 138495932 | rs2179414        | 4 | 0.4741 | 0.9595 | 0.9238 | 1.0521  | 0.24812 | 0.80193 | 0.37808 | 0.91332 | 0.11221  | 0.06368  | 0.44149 | 1.0264  | 0.17649  | 0.83036 | 0.48102 | --      | --      | --      | --      | 0.96101 | 0.076098 | 0.25049 | 0.47261 |
| 6 | 138495994 | rs78892858       | 3 | 0.8519 | 0.978  | 0.9154 | --      | --      | --      | 0.92255 | 0.23642 | 0.30442  | 0.34247  | 1.0988  | 0.34241 | 0.43672  | 0.35245 | --      | --      | --      | --      | 0.97918 | 0.15034 | 0.64866  | 0.33291 |         |
| 6 | 138496189 | rs9484124        | 3 | 0.6658 | 0.9552 | 0.8825 | --      | --      | --      | 0.89681 | 0.20089 | 0.075885 | 0.3089   | 1.0832  | 0.32603 | 0.45463  | 0.31436 | --      | --      | --      | --      | 0.96188 | 0.13524 | 0.35228  | 0.31313 |         |
| 6 | 138496612 | rs77120093       | 3 | 0.8519 | 0.978  | 0.9155 | --      | --      | --      | 0.92257 | 0.23643 | 0.30452  | 0.34247  | 1.0988  | 0.34242 | 0.43688  | 0.35243 | --      | --      | --      | --      | 0.97918 | 0.15035 | 0.64855  | 0.3329  |         |
| 6 | 138496694 | rs1013054        | 4 | 0.4762 | 0.9594 | 0.9348 | 1.0493  | 0.25255 | 0.74393 | 0.37437 | 0.91369 | 0.11299  | 0.066655 | 0.44184 | 1.0181  | 0.17754  | 0.89972 | 0.48315 | --      | --      | --      | --      | 0.96247 | 0.076672 | 0.27568 | 0.47258 |
| 6 | 138496761 | rs76900055       | 2 | 0.9429 | 0.9788 | 0.724  | --      | --      | --      | 1.0538  | 0.3652  | 0.6524   | 0.31291  | 0.84135 | 0.52274 | 0.29443  | 0.35493 | --      | --      | --      | --      | --      | --      | --       | --      |         |
| 6 | 138496850 | rs188603037      | 2 | 0.9544 | 0.9334 | 0.922  | 0.7895  | 2.0926  | 0.65097 | 0.60668 | --      | --       | --       | --      | --      | --       | --      | 1.0145  | 1.4758  | 0.98101 | 0.34624 | --      | --      | --       | --      |         |
| 6 | 138496901 | rs74958039       | 3 | 0.869  | 0.9805 | 0.9049 | --      | --      | --      | 0.92256 | 0.23652 | 0.30452  | 0.34255  | 1.1125  | 0.34576 | 0.3888   | 0.3498  | --      | --      | --      | --      | 0.98122 | 0.151   | 0.67861  | 0.33243 |         |
| 6 | 138496935 | rs78060281       | 3 | 0.8518 | 0.978  | 0.9154 | --      | --      | --      | 0.92254 | 0.23643 | 0.3043   | 0.34245  | 1.0988  | 0.34242 | 0.43688  | 0.35243 | --      | --      | --      | --      | 0.97917 | 0.15035 | 0.64837  | 0.3329  |         |
| 6 | 138496991 | rs76957951       | 3 | 0.9157 | 1.0154 | 0.6364 | --      | --      | --      | 0.83036 | 0.301   | 0.091677 | 0.36869  | 1.3534  | 0.43185 | 0.065437 | 0.35886 | --      | --      | --      | --      | 1.0374  | 0.17764 | 0.50827  | 0.36607 |         |
| 6 | 138497217 | rs75853286       | 3 | 0.8518 | 0.978  | 0.9154 | --      | --      | --      | 0.92252 | 0.23643 | 0.3042   | 0.34246  | 1.0988  | 0.34243 | 0.43676  | 0.35242 | --      | --      | --      | --      | 0.97918 | 0.15035 | 0.64842  | 0.33289 |         |
| 6 | 138497446 | rs6930473        | 3 | 0.946  | 0.9922 | 0.8885 | --      | --      | --      | 0.91041 | 0.23465 | 0.21346  | 0.33091  | 1.0987  | 0.33399 | 0.41453  | 0.34508 | --      | --      | --      | --      | 1.0057  | 0.1442  | 0.67739  | 0.33432 |         |
| 6 | 138497468 | rs116238347      | 3 | 0.8519 | 0.978  | 0.9154 | --      | --      | --      | 0.92254 | 0.23643 | 0.3043   | 0.34245  | 1.0989  | 0.34243 | 0.43657  | 0.35242 | --      | --      | --      | --      | 0.97916 | 0.15035 | 0.64821  | 0.33288 |         |
| 6 | 138497540 | rs140545140      | 3 | 0.8519 | 0.978  | 0.9154 | --      | --      | --      | 0.92254 | 0.23643 | 0.3043   | 0.34245  | 1.0989  | 0.34243 | 0.43645  | 0.35242 | --      | --      | --      | --      | 0.97917 | 0.15035 | 0.64823  | 0.33288 |         |
| 6 | 138497543 | rs145625656      | 3 | 0.8529 | 0.9781 | 0.916  | --      | --      | --      | 0.92577 | 0.23739 | 0.32903  | 0.3438   | 1.1024  | 0.34276 | 0.42522  | 0.35439 | --      | --      | --      | --      | 0.97723 | 0.15044 | 0.61777  | 0.33452 |         |
| 6 | 138497553 | rs6930801        | 3 | 0.8531 | 0.9783 | 0.9278 | --      | --      | --      | 0.9303  | 0.23457 | 0.34336  | 0.33445  | 1.0926  | 0.34301 | 0.46239  | 0.34725 | --      | --      | --      | --      | 0.97774 | 0.14988 | 0.63185  | 0.3278  |         |
| 6 | 138497648 | rs12527896       | 4 | 0.507  | 1.325  | 0.715  | --      | --      | --      | 2.1564  | 0.76981 | 0.037486 | 0.47036  | 0.27837 | 1.6696  | 0.007613 | 0.45442 | 0.78602 | 1.8113  | 0.74518 | 0.39341 | 1.2832  | 0.55832 | 0.35133  | 0.40263 |         |
| 6 | 138497735 | rs188252817      | 3 | 0.491  | 1.3507 | 0.9509 | --      | --      | --      | 1.1595  | 0.65043 | 0.57957  | 0.40239  | 1.4778  | 1.8054  | 0.60986  | 0.30006 | --      | --      | --      | --      | 1.5371  | 0.62286 | 0.097325 | 0.35128 |         |
| 6 | 138497987 | rs191609468      | 2 | 0.9955 | 0.9959 | 0.7732 | --      | --      | --      | 1.1274  | 0.84302 | 0.68875  | 0.36576  | 0.70049 | 1.4203  | 0.33046  | 0.36214 | --      | --      | --      | --      | --      | --      | --       | --      |         |
| 6 | 138498011 | rs76207231       | 3 | 0.8519 | 0.978  | 0.9154 | --      | --      | --      | 0.92254 | 0.23643 | 0.30431  | 0.34244  | 1.0989  | 0.34243 | 0.43644  | 0.35242 | --      | --      | --      | --      | 0.97918 | 0.15035 | 0.64838  | 0.33287 |         |
| 6 | 138498325 | rs139537013      | 2 | 0.943  | 0.9788 | 0.7242 | --      | --      | --      | 1.0538  | 0.3652  | 0.65252  | 0.31291  | 0.84145 | 0.52278 | 0.29473  | 0.3549  | --      | --      | --      | --      | --      | --      | --       | --      |         |
| 6 | 138498392 | chr6:138498392:l | 3 | 0.8559 | 0.9787 | 0.9462 | --      | --      | --      | 0.9252  | 0.23637 | 0.31534  | 0.33856  | 1.058   | 0.34394 | 0.62817  | 0.34776 | --      | --      | --      | --      | 0.9863  | 0.14989 | 0.74603  | 0.33236 |         |
| 6 | 138498401 | rs190236810      | 2 | 0.943  | 0.9788 | 0.7242 | --      | --      | --      | 1.0538  | 0.3652  | 0.65252  | 0.31291  | 0.84145 | 0.52278 | 0.29473  | 0.3549  | --      | --      | --      | --      | --      | --      | --       | --      |         |
| 6 | 138498713 | rs6941550        | 4 | 0.4869 | 0.9555 | 0.9984 | 0.97385 | 0.27658 | 0.97961 | 0.51053 | 0.93897 | 0.12803  | 0.34744  | 0.54696 | 0.97398 | 0.19611  | 0.76005 | 0.60765 | --      | --      | --      | --      | 0.95777 | 0.086669 | 0.39982 | 0.59167 |
| 6 | 138498825 | rs76037364       | 3 | 0.8955 | 0.9845 | 0.9199 | --      | --      | --      | 0.9279  | 0.23642 | 0.33598  | 0.34006  | 1.0995  | 0.34262 | 0.43592  | 0.35241 | --      | --      | --      | --      | 0.98716 | 0.15    | 0.76086  | 0.33363 |         |
| 6 | 138499024 | rs76954471       | 3 | 0.8956 | 0.9845 | 0.9199 | --      | --      | --      | 0.92791 | 0.23642 | 0.33603  | 0.34006  | 1.0995  | 0.34262 | 0.43593  | 0.35241 | --      | --      | --      | --      | 0.98716 | 0.15    | 0.7609   | 0.33363 |         |
| 6 | 138499039 | rs189537988      | 3 | 0.9119 | 1.0524 | 0.8601 | 0.96587 | 1.8019  | 0.77975 | 0.52401 | 0.78421 | 0.7278   | 0.56251  | 0.58582 | --      | --       | --      | 1.3288  | 0.63306 | 0.3375  | 0.49779 | --      | --      | --       | --      |         |
| 6 | 138499127 | rs180761769      | 2 | 0.4663 | 2.5501 | 0.6519 | --      | --      | --      | --      | --      | --       | --       | 1.6218  | 1.6302  | 0.52357  | 0.42315 | 5.3583  | 2.0881  | 0.03647 | 0.4323  | --      | --      | --       | --      |         |
| 6 | 138499231 | rs75544721       | 3 | 0.8955 | 0.9845 | 0.9199 | --      | --      | --      | 0.92789 | 0.23643 | 0.3359   | 0.3      |         |         |          |         |         |         |         |         |         |         |          |         |         |
